# Supplementary material for: Synthesis of central spiro-bis-THF fragments of symbiospirols A–C
Source: Royal Society of Chemistry journal article supplement (doi:10.1039/d2nj02227c), 2022-01-01

Electronic Supplementary Information

**Synthesis of Central Spiro-*bis*-THF Fragments of  
Symbiospirols A–C**

Mahesh H. Shinde, Chandrababu N. Kona, Chepuri V. Ramana\*

Division of Organic Chemistry, CSIR-National Chemical Laboratory

Dr. Homi Bhabha Road, Pune 411 008, India

*Email: vr.chepuri@ncl.res.in*

**Table of Contents**

|    |                                                             |    |
|----|-------------------------------------------------------------|----|
| 1. | HPLC data comparison of <sup>13</sup> C NMR chemical shifts | S2 |
| 3. | NMR spectra's of compounds                                  | S3 |

## HPLC data of compounds 4a and 4b:

### Area % Report

Data File: E:\mahesh\New\inverse spiro mixt 11.rsl\inverse spiro mixt 11.dat  
 Method: C:\Enterprise\Method\007.met  
 Acquired: 25-11-2021 12:33:46 (GMT +05:30)  
 Printed: 25-11-2021 15:01:38 (GMT +05:30)

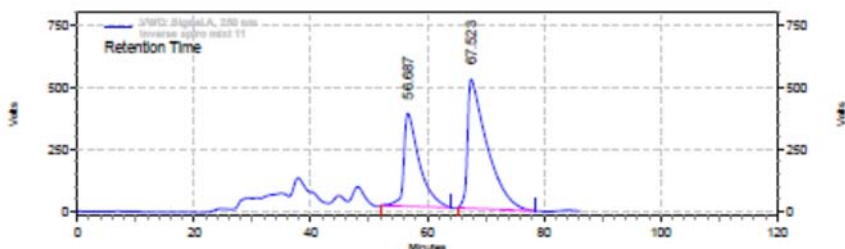

VWD: Signal A,  
250 nm Results

| Retention Time | Area       | Area % | Height  | Height % |
|----------------|------------|--------|---------|----------|
| 56.687         | 1169418050 | 36.48  | 6287479 | 41.84    |
| 67.523         | 2036555259 | 63.52  | 8739326 | 58.16    |

| Totals | Area       | Area % | Height   | Height % |
|--------|------------|--------|----------|----------|
|        | 3205973309 | 100.00 | 15026805 | 100.00   |

Column: YMC HPLC, Chiral Art (250 X 10.0 mm I.D), (S- 5  $\mu$ m)  
 Solvent: 25% IPA-n-Hexane  
 Flow rate: 0.5 ml/min  
 Run Time: 120 min  
 Wavelength: 250 nm

## HPLC data of compounds 4a' and 4b':

### Area % Report

Data File: E:\mahesh\New\normal spiro mixt 12.rsl\normal spiro mixt 12.dat  
 Method: C:\Enterprise\Method\007.met  
 Acquired: 25-11-2021 14:02:44 (GMT +05:30)  
 Printed: 25-11-2021 16:05:52 (GMT +05:30)

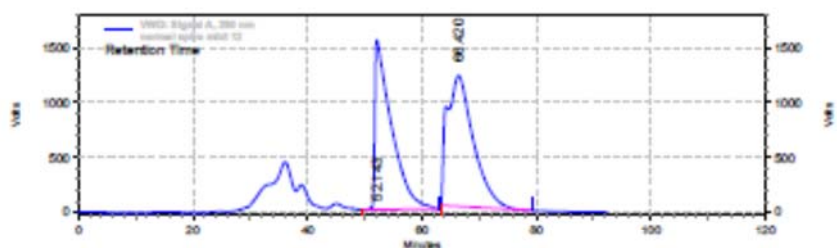

VWD: Signal A,  
250 nm Results

| Retention Time | Area       | Area % | Height   | Height % |
|----------------|------------|--------|----------|----------|
| 52.143         | 5220464684 | 45.01  | 25863531 | 56.43    |
| 66.420         | 6378399053 | 54.99  | 19967044 | 43.57    |

| Totals | Area        | Area % | Height   | Height % |
|--------|-------------|--------|----------|----------|
|        | 11598863737 | 100.00 | 45830575 | 100.00   |

Column: YMC HPLC, Chiral Art (250 X 10.0 mm I.D), (S-5  $\mu$ m)  
 Solvent: 25% IPA-n-Hexane  
 Flow rate: 0.5 ml/min  
 Run Time: 120 min  
 Wavelength: 250 nm

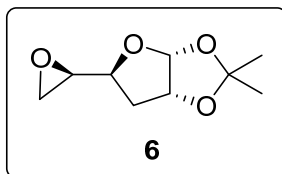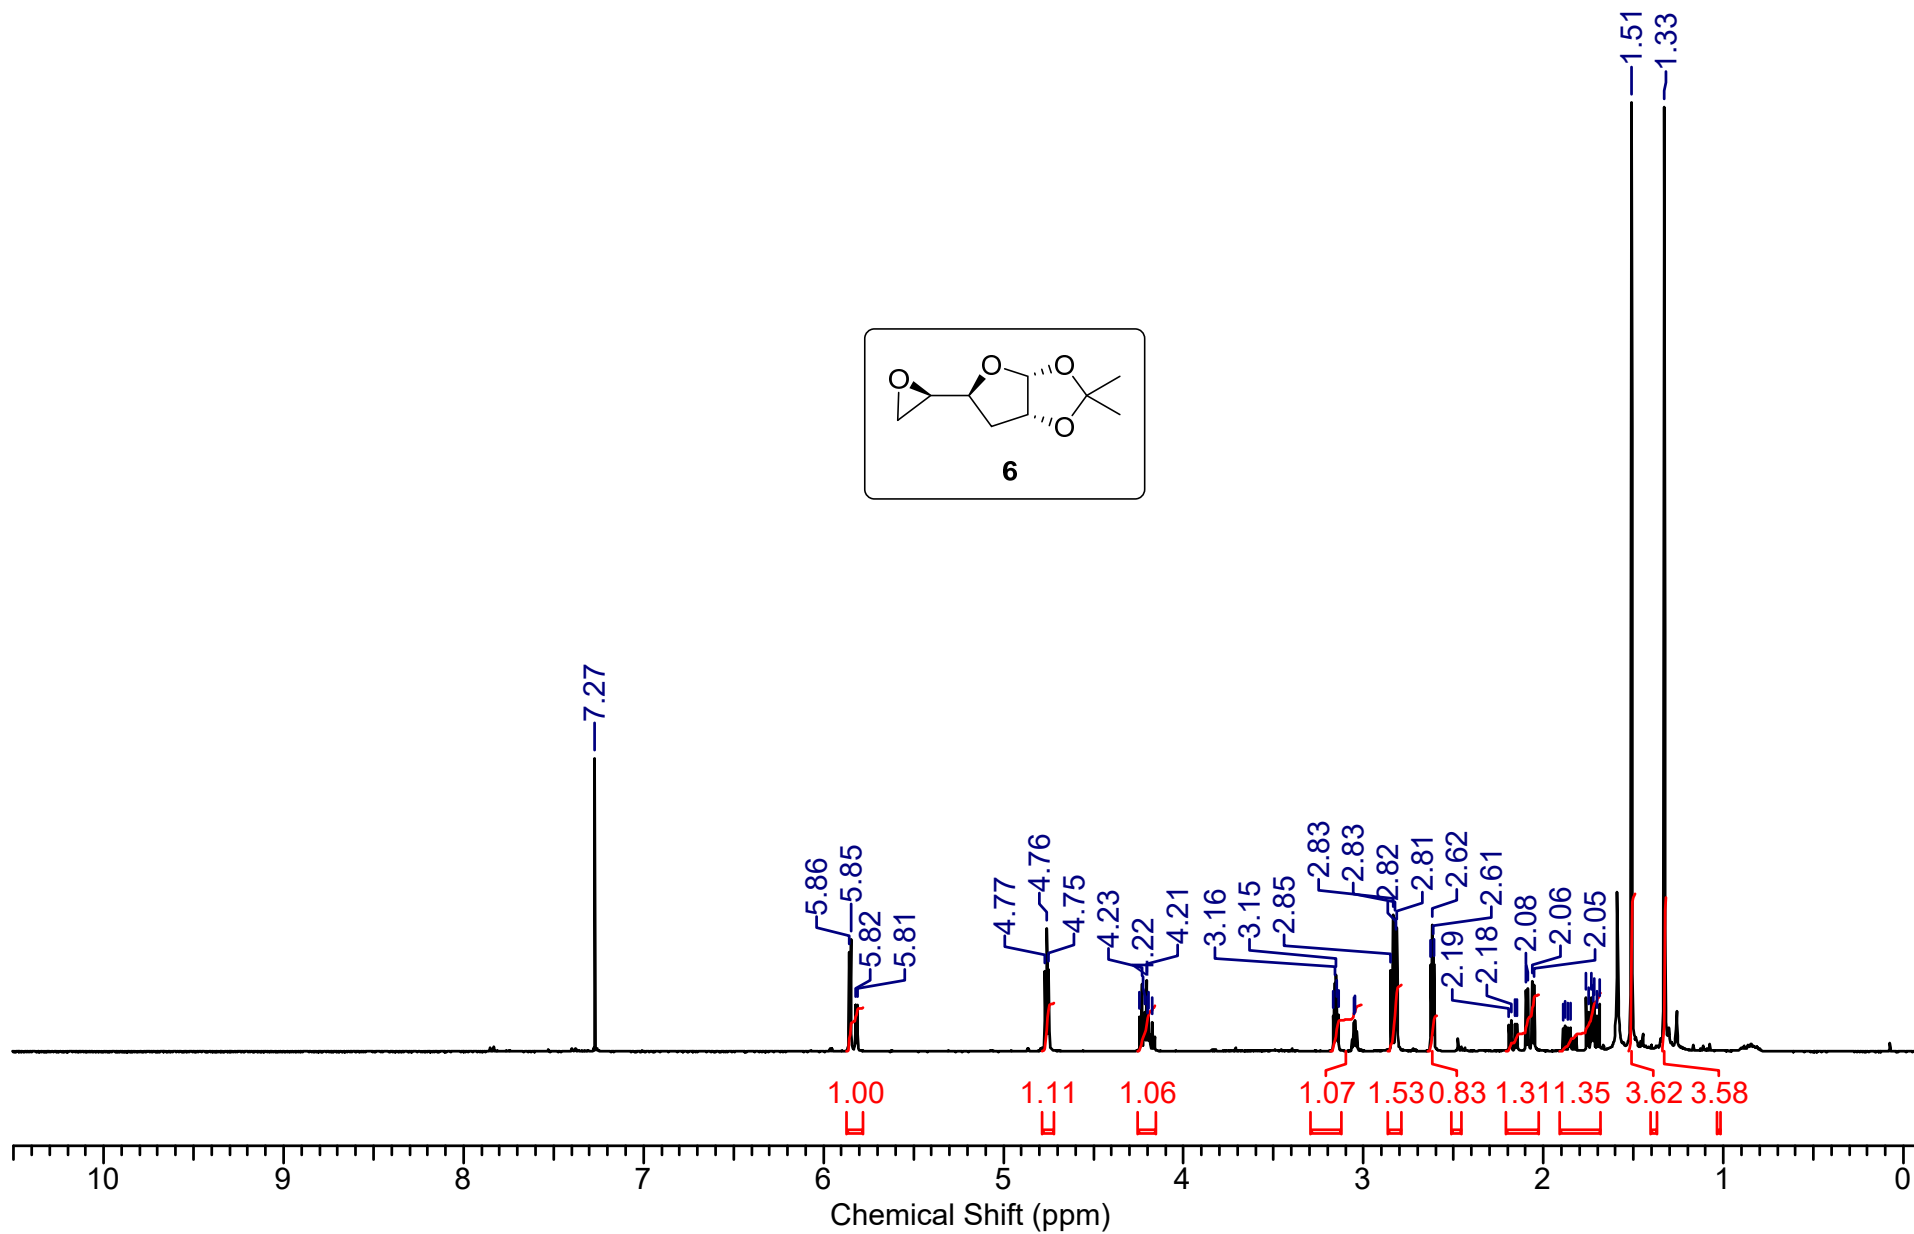

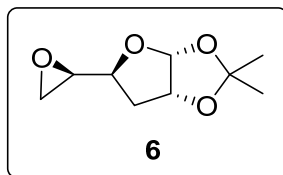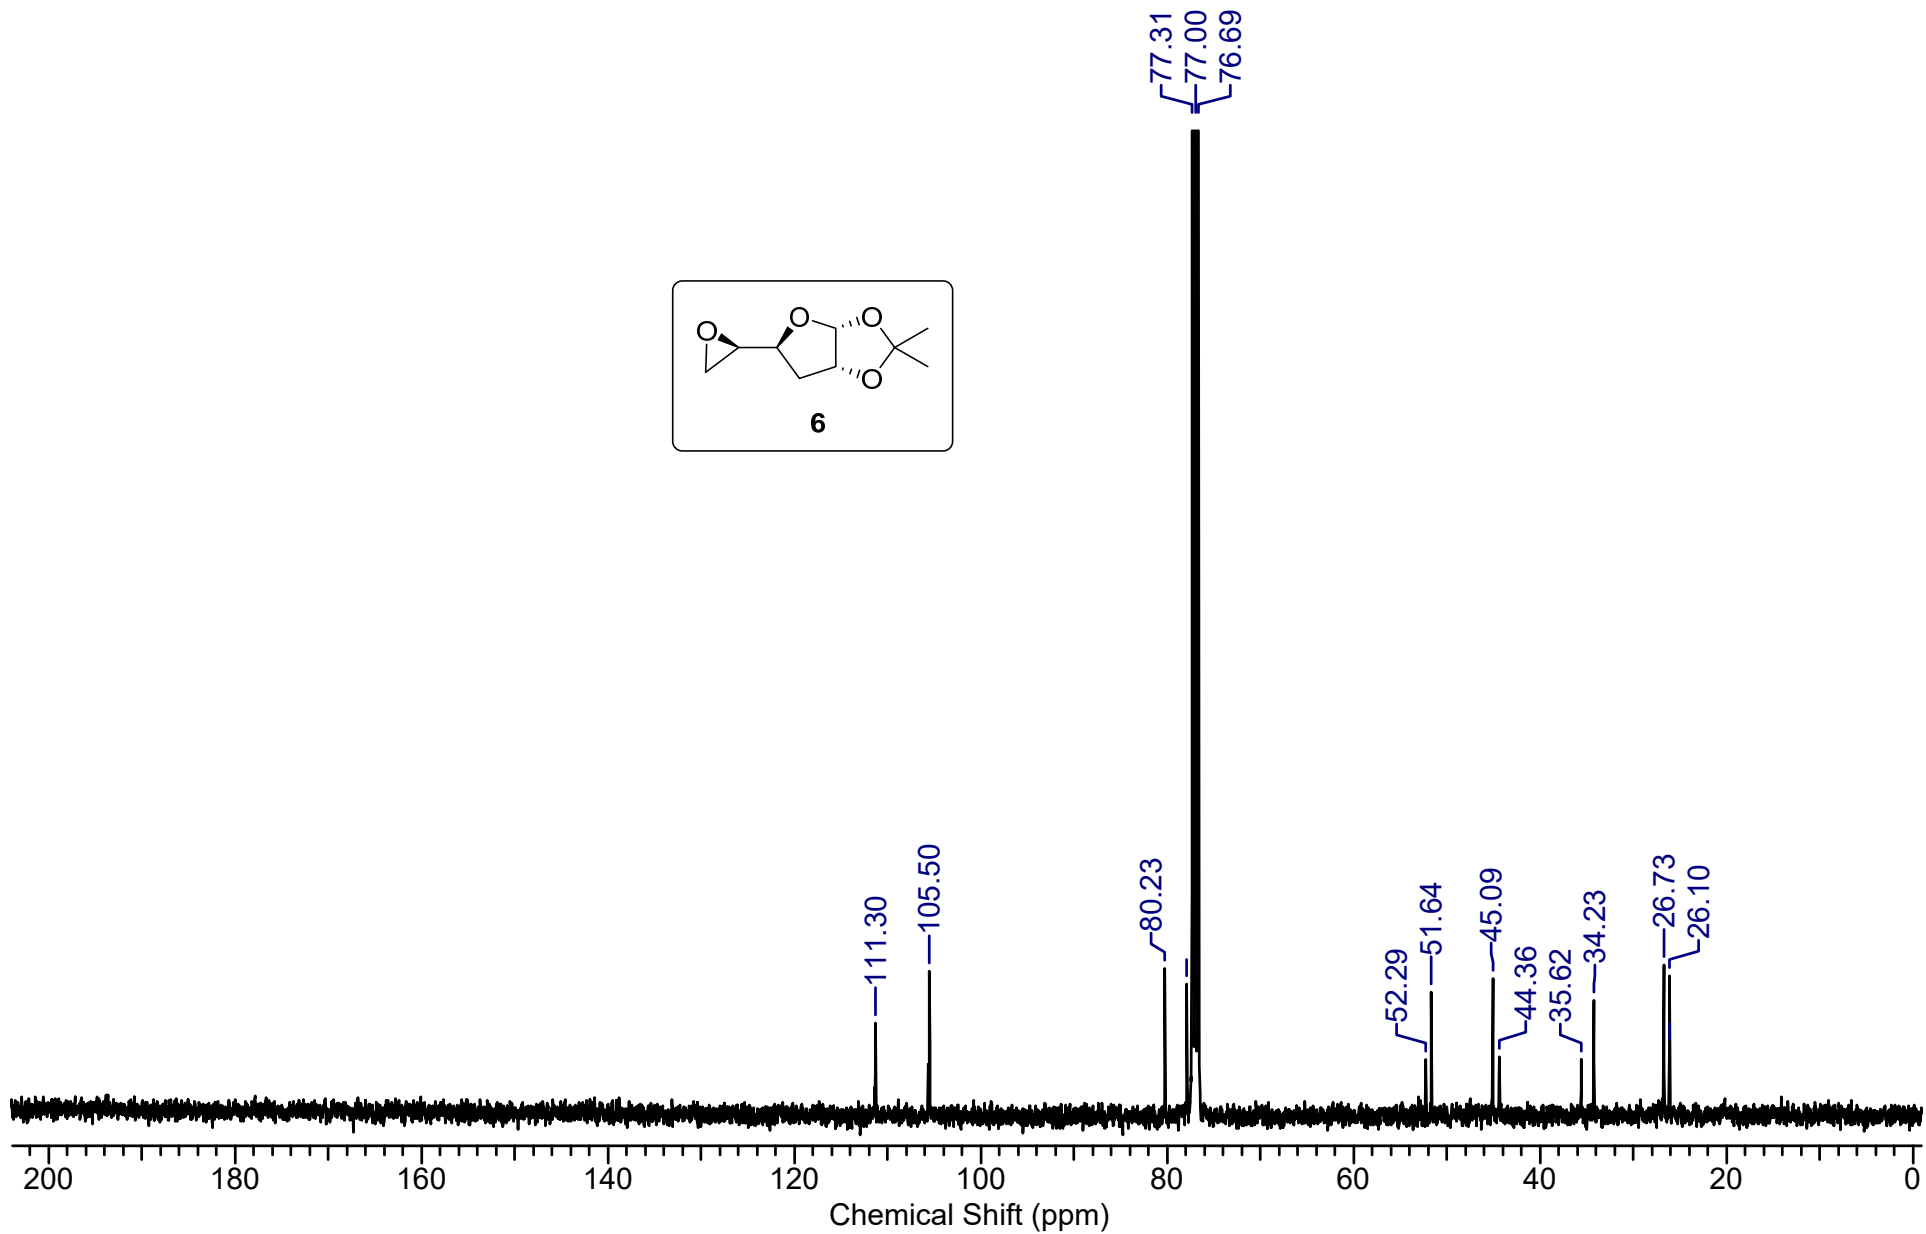

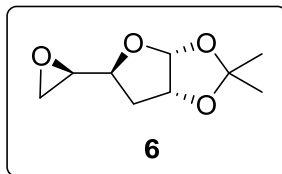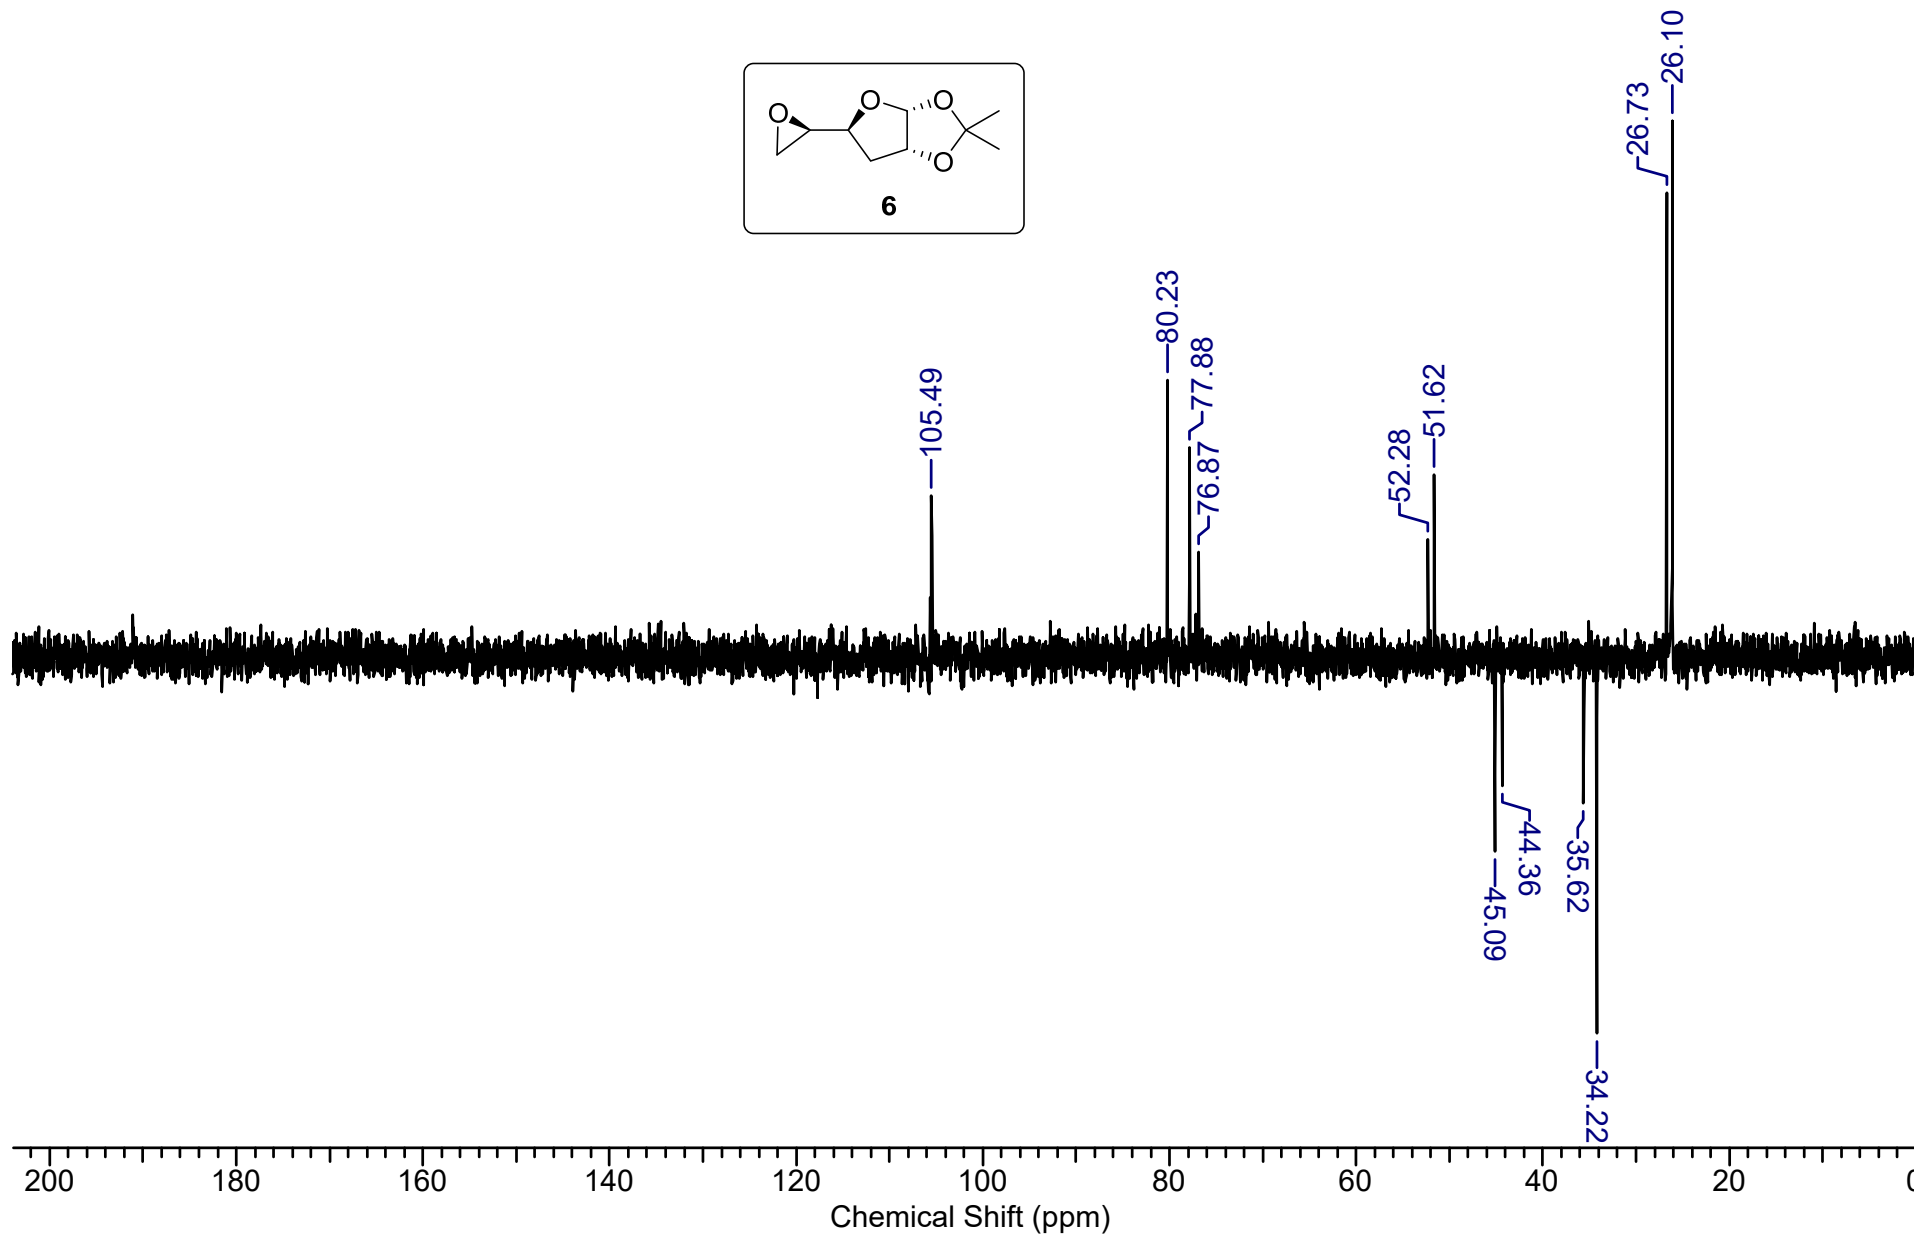

MS-5\_210108091236 #428 RT: 2.45 AV: 1 NL: 7.95E7  
T: FTMS + p ESI Full ms [100.0000-1500.0000]

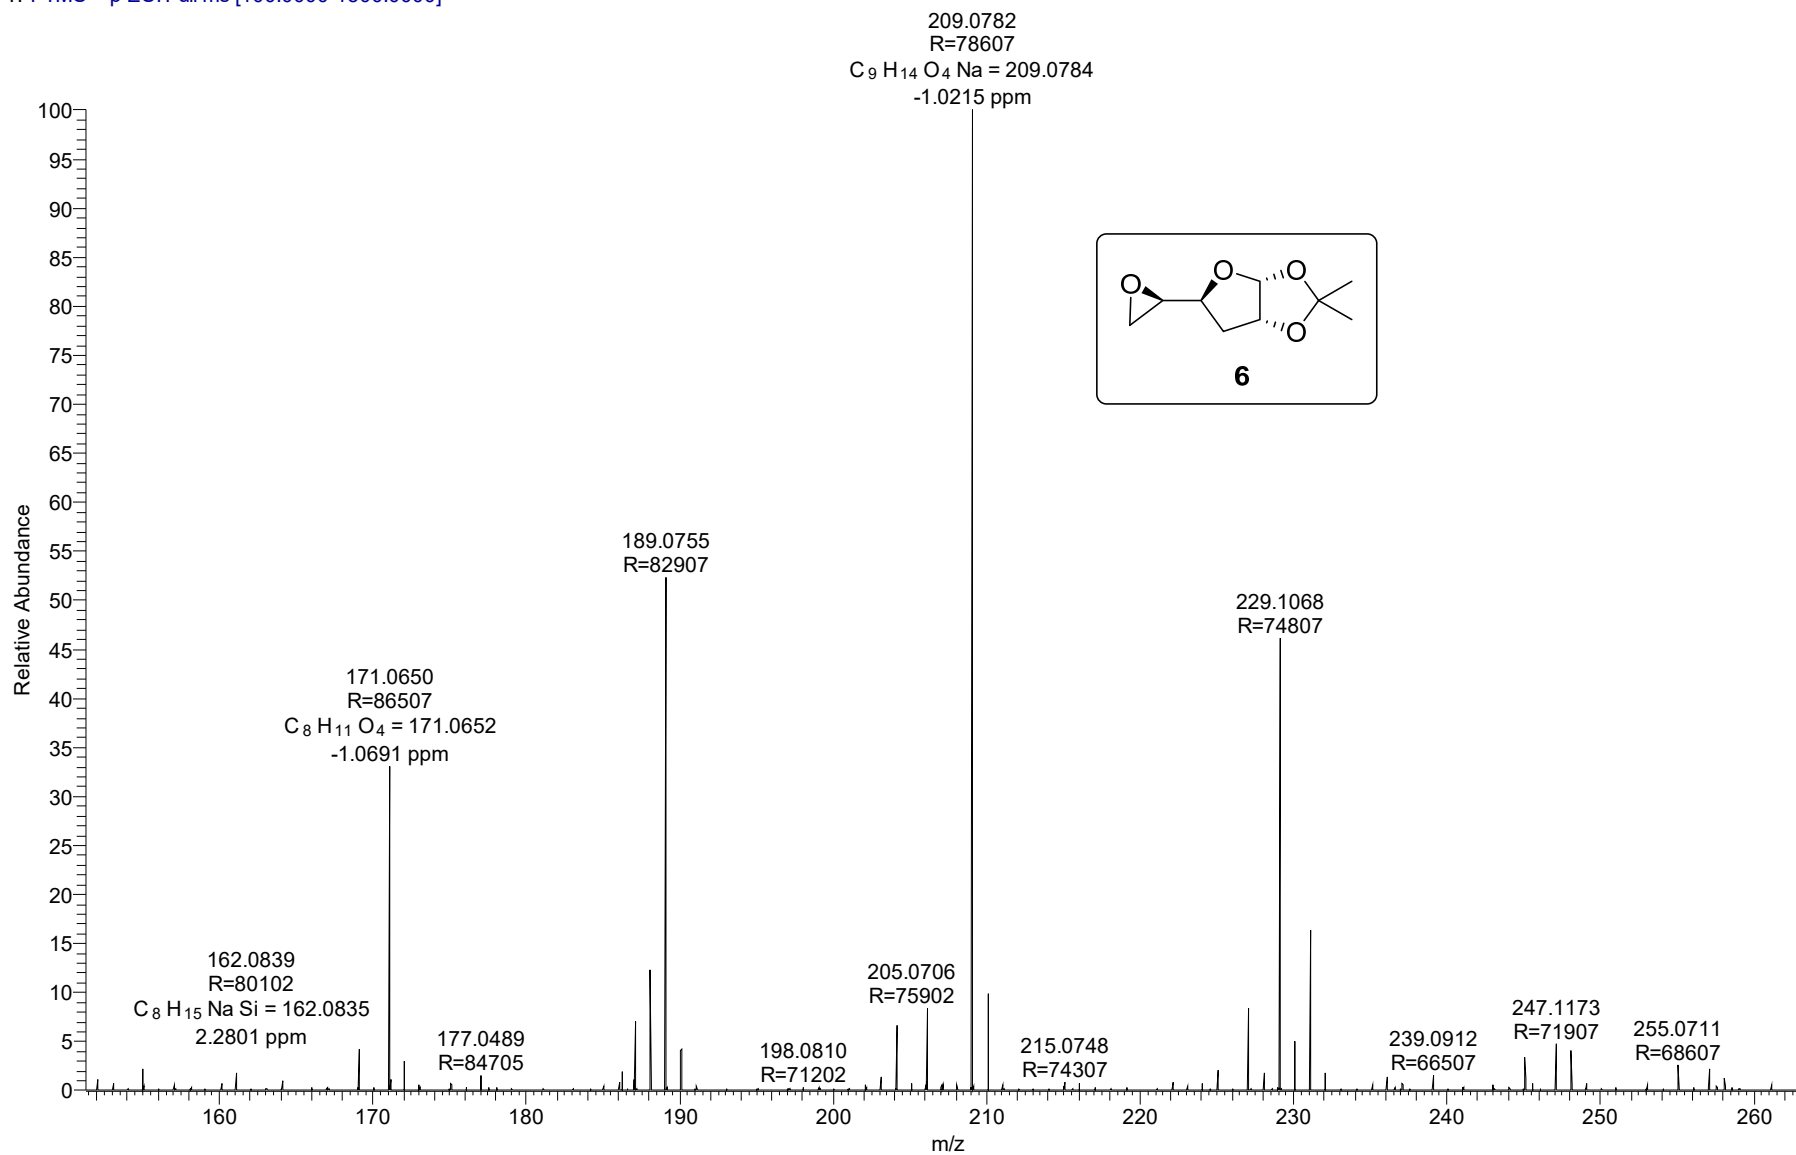

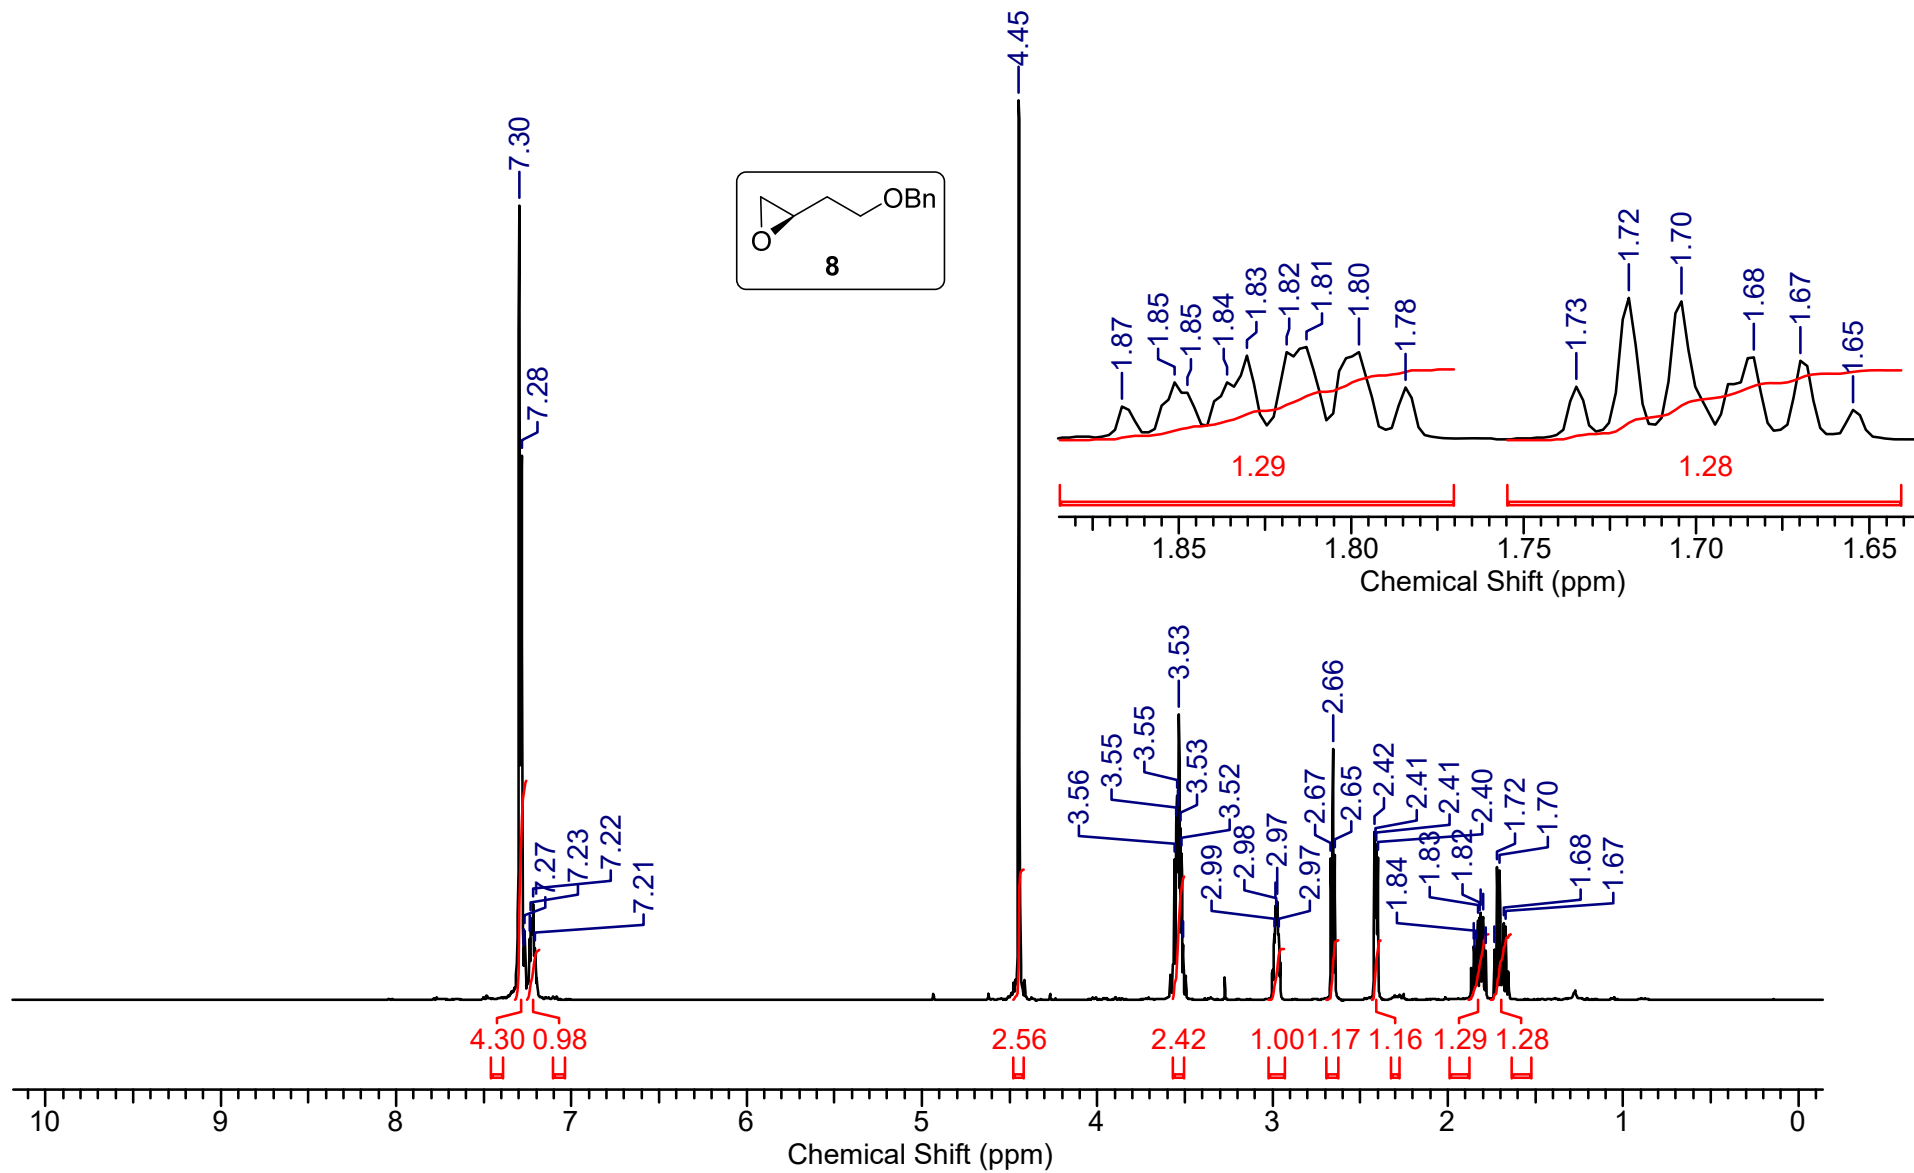

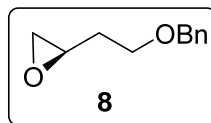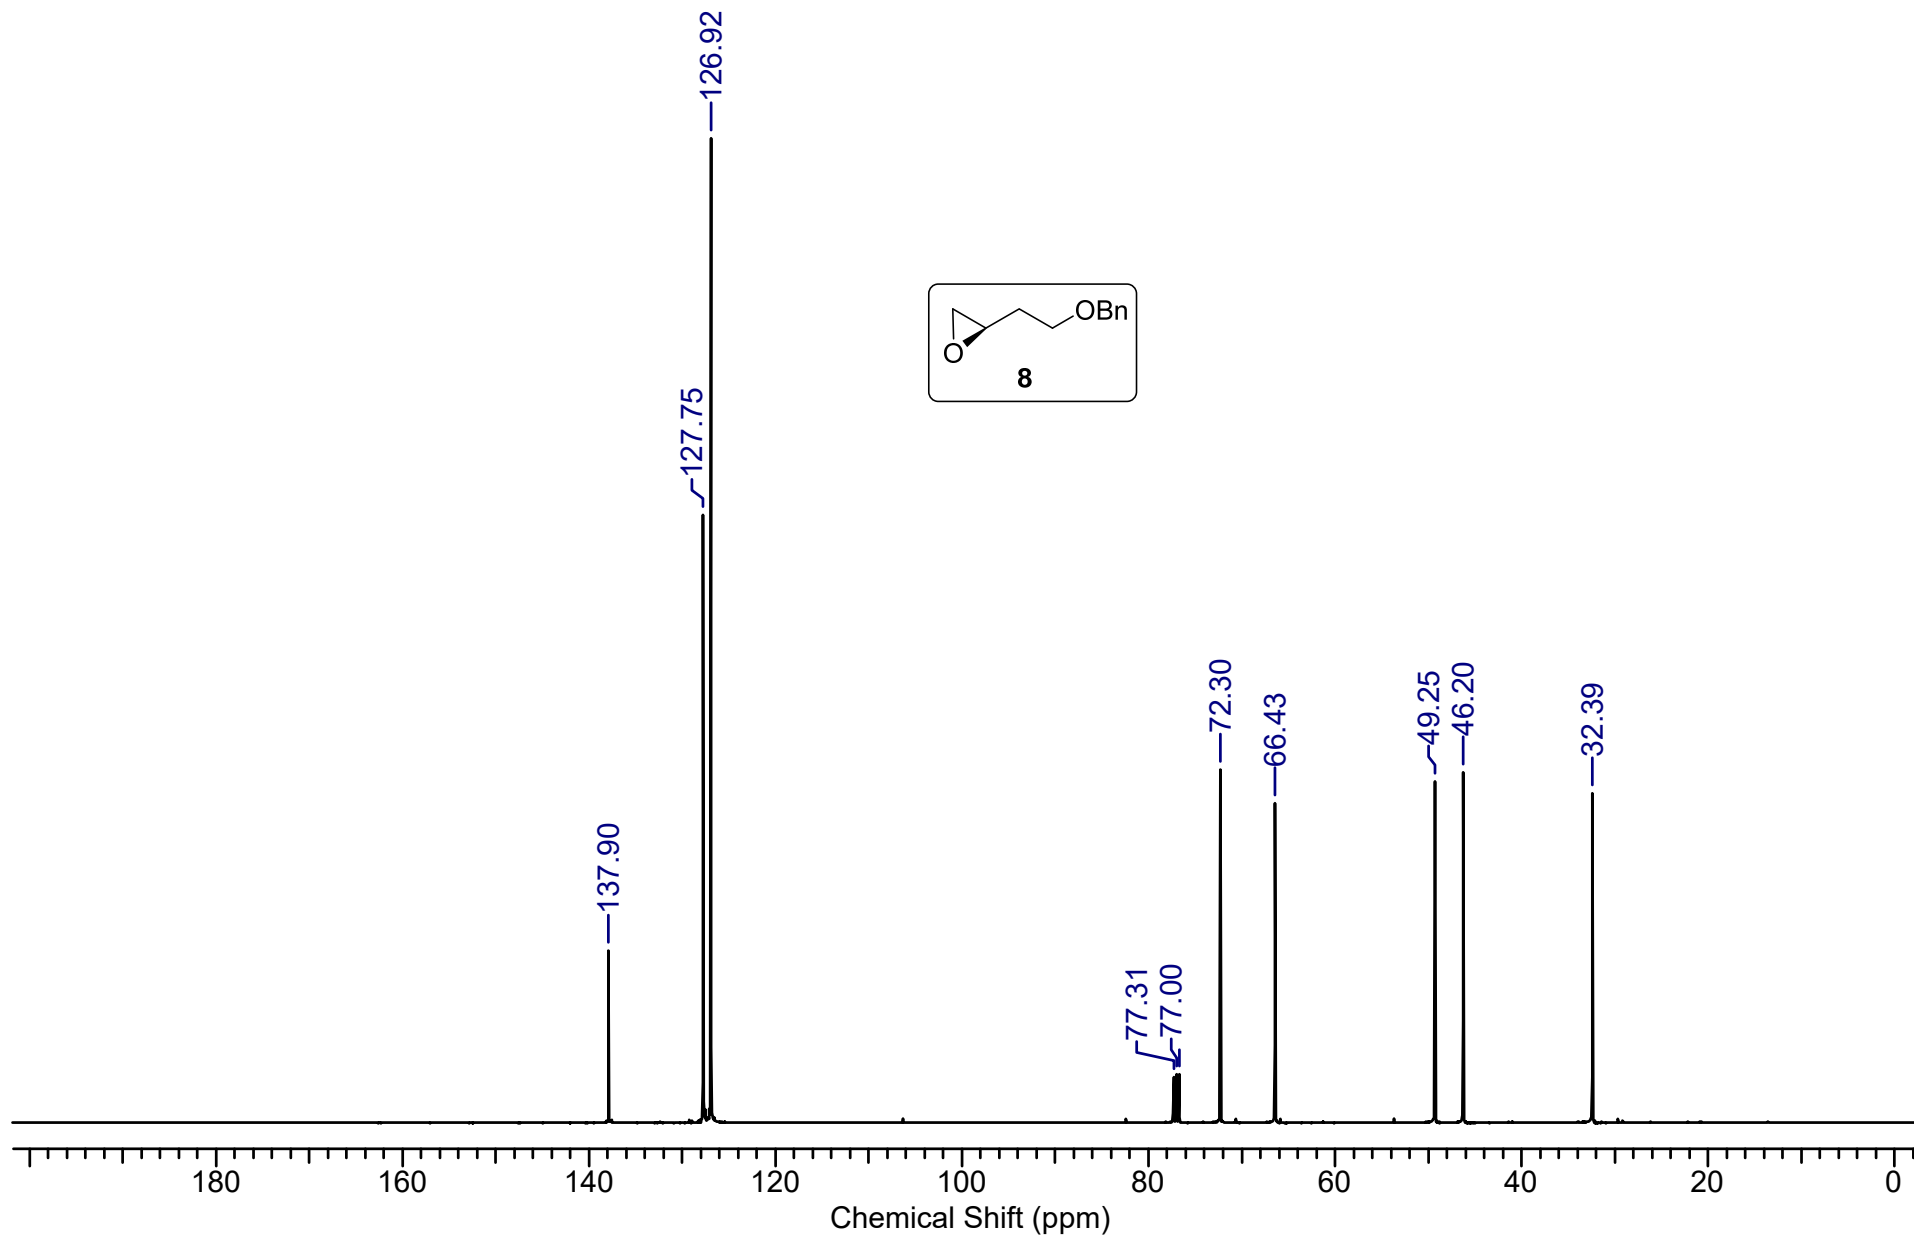



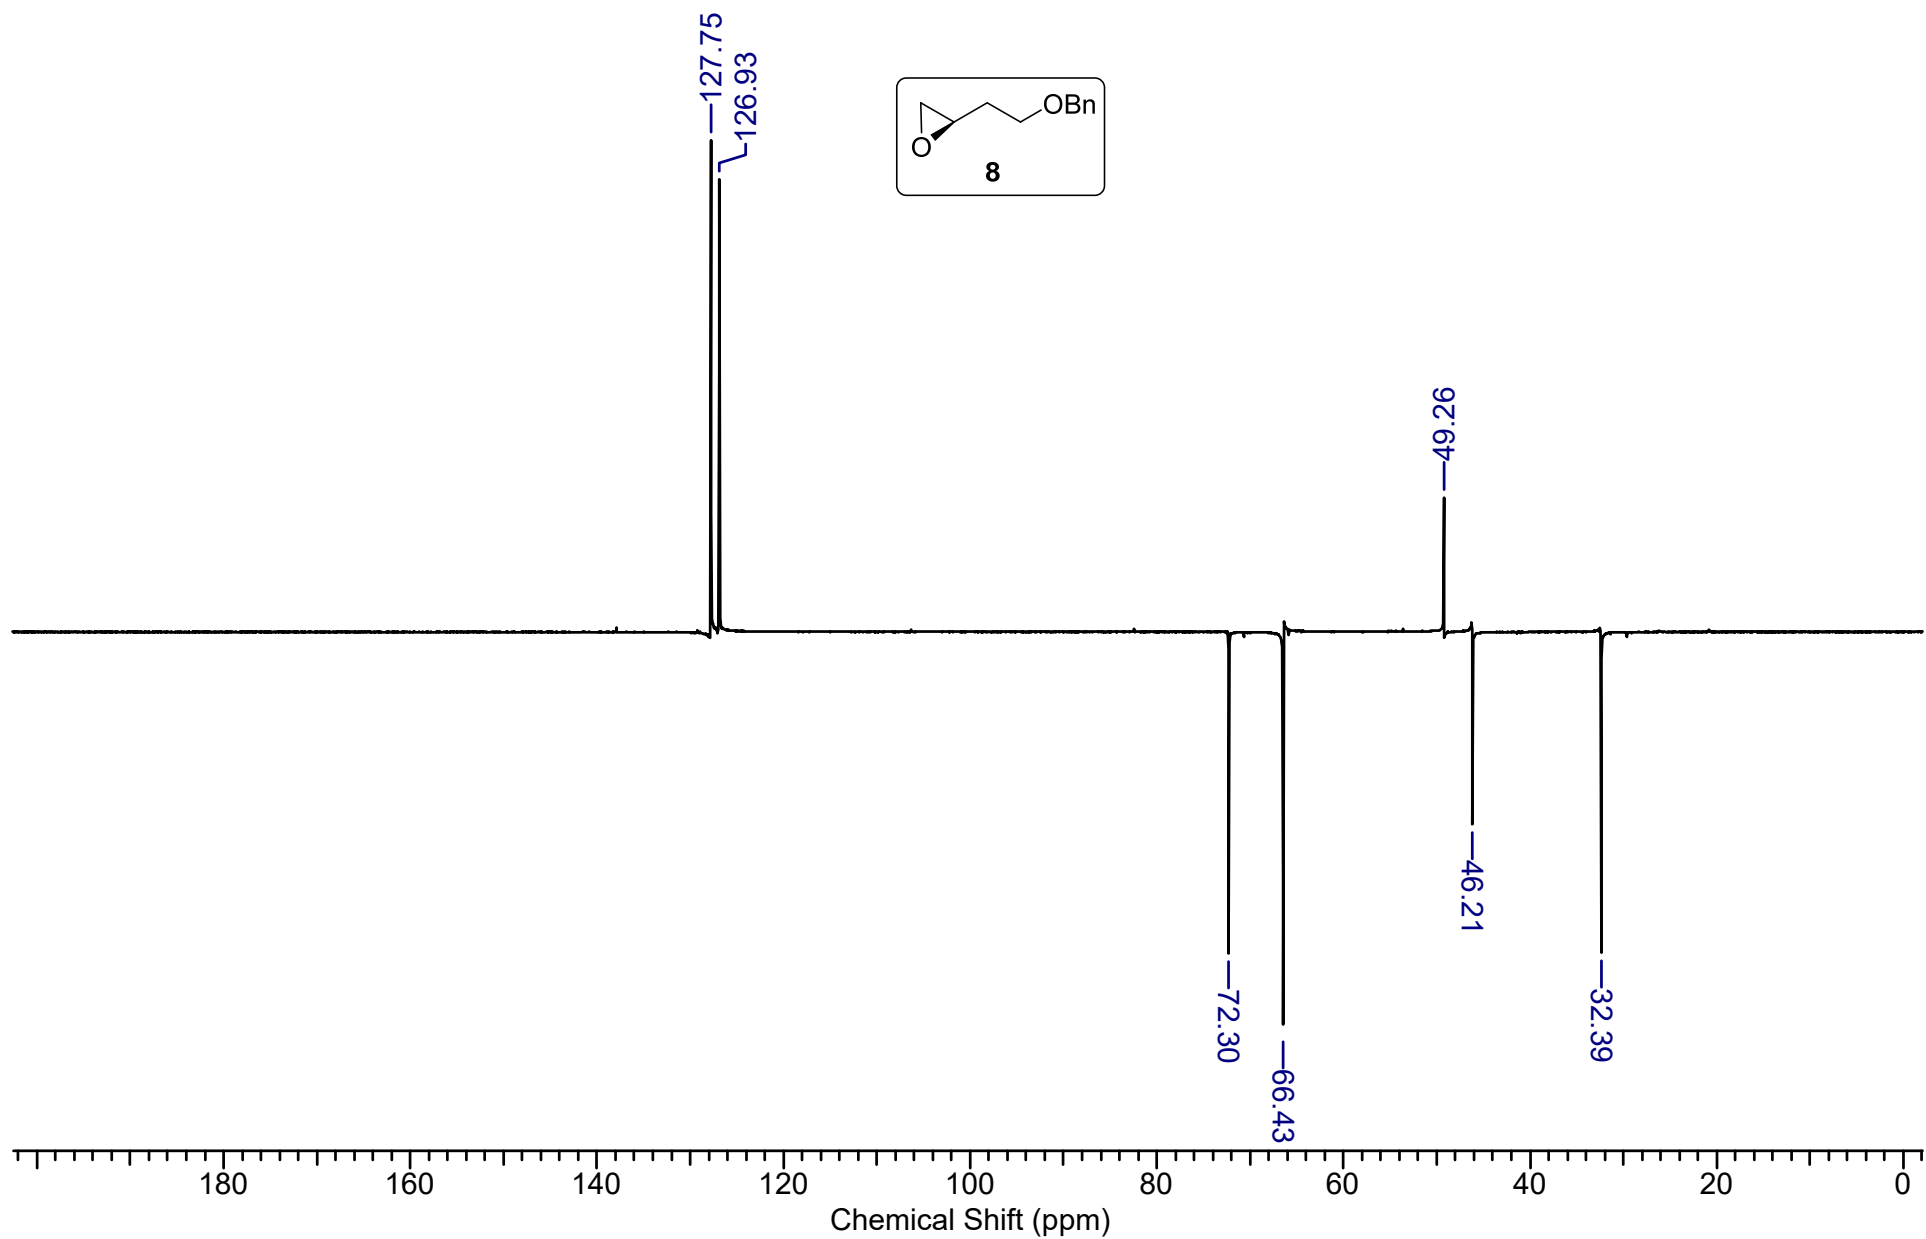

MSH-303 #318 RT: 1.74 AV: 1 NL: 8.11E8  
T: FTMS + p ESI Full ms [100.0000-1500.0000]

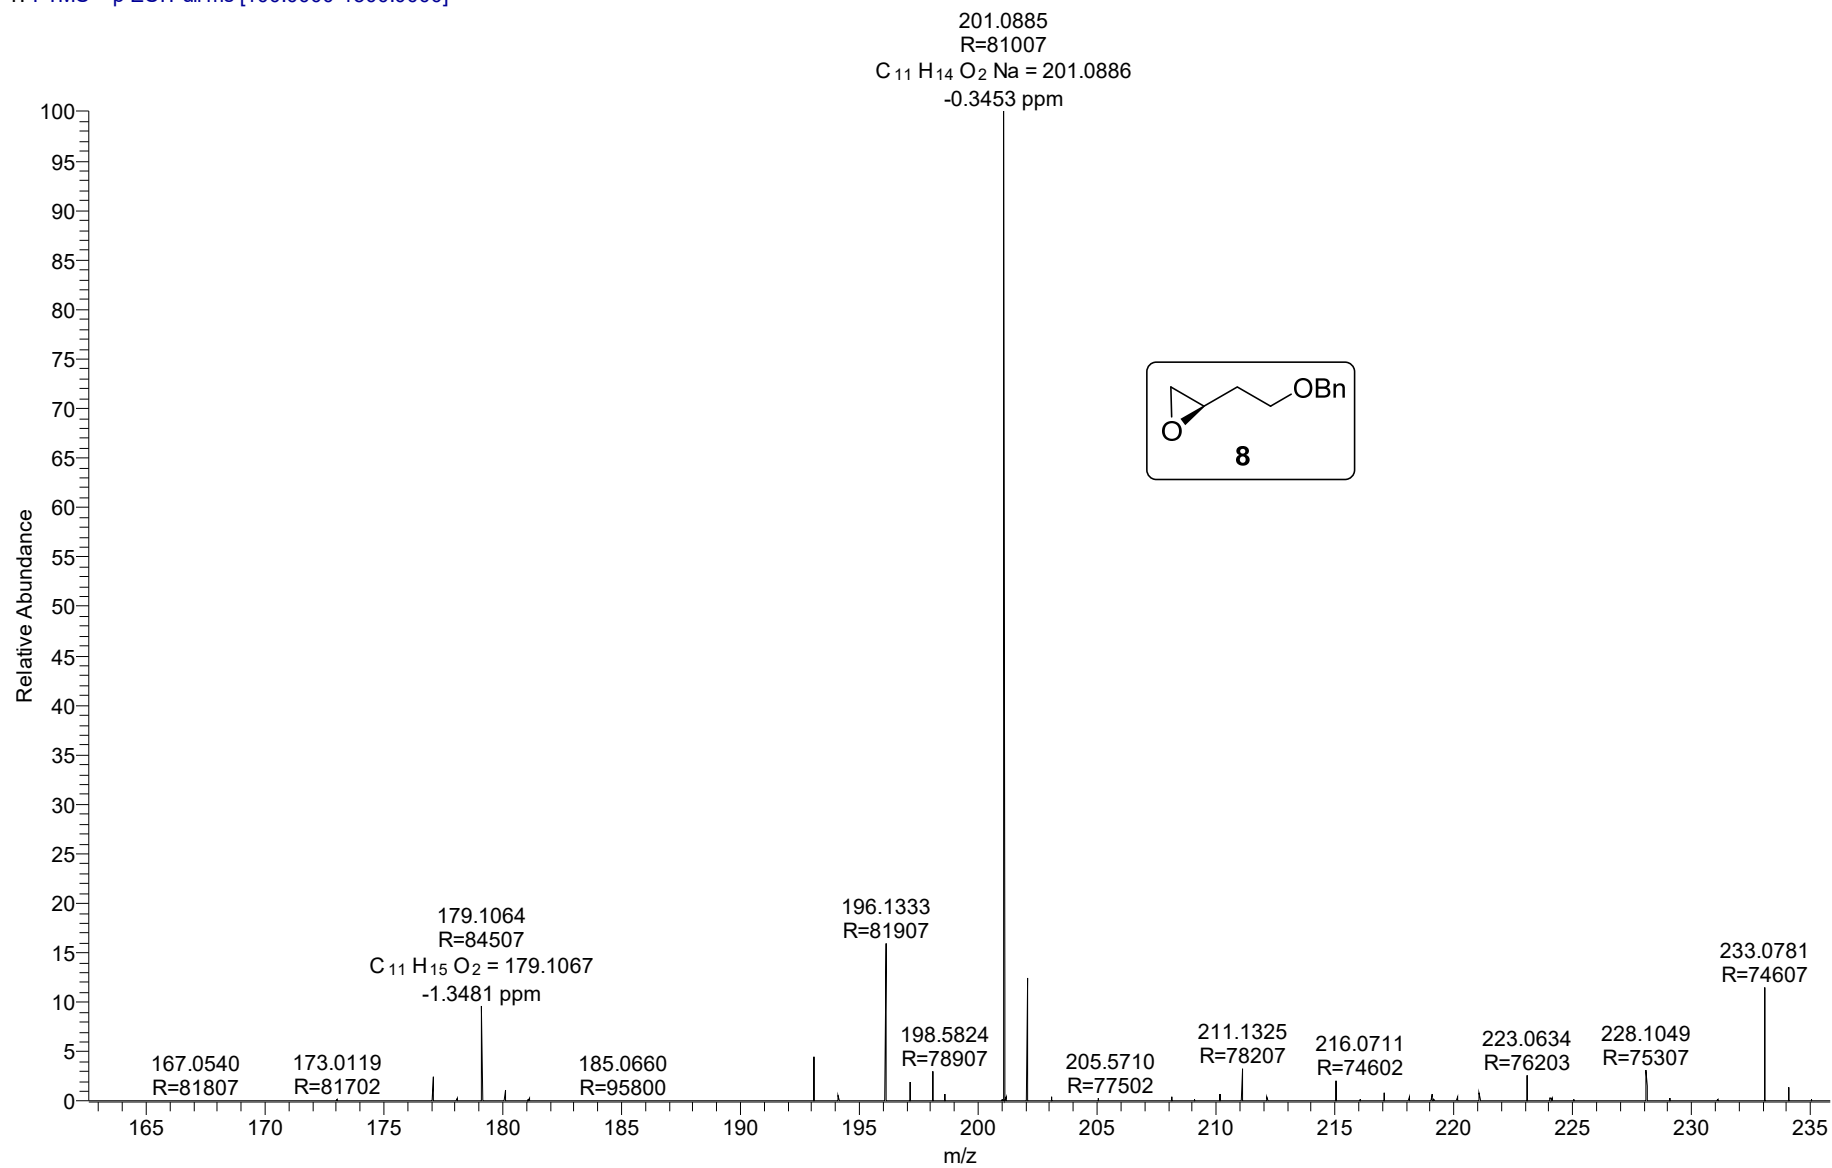

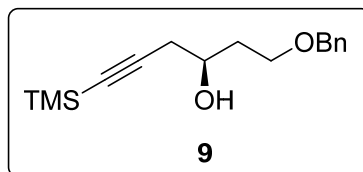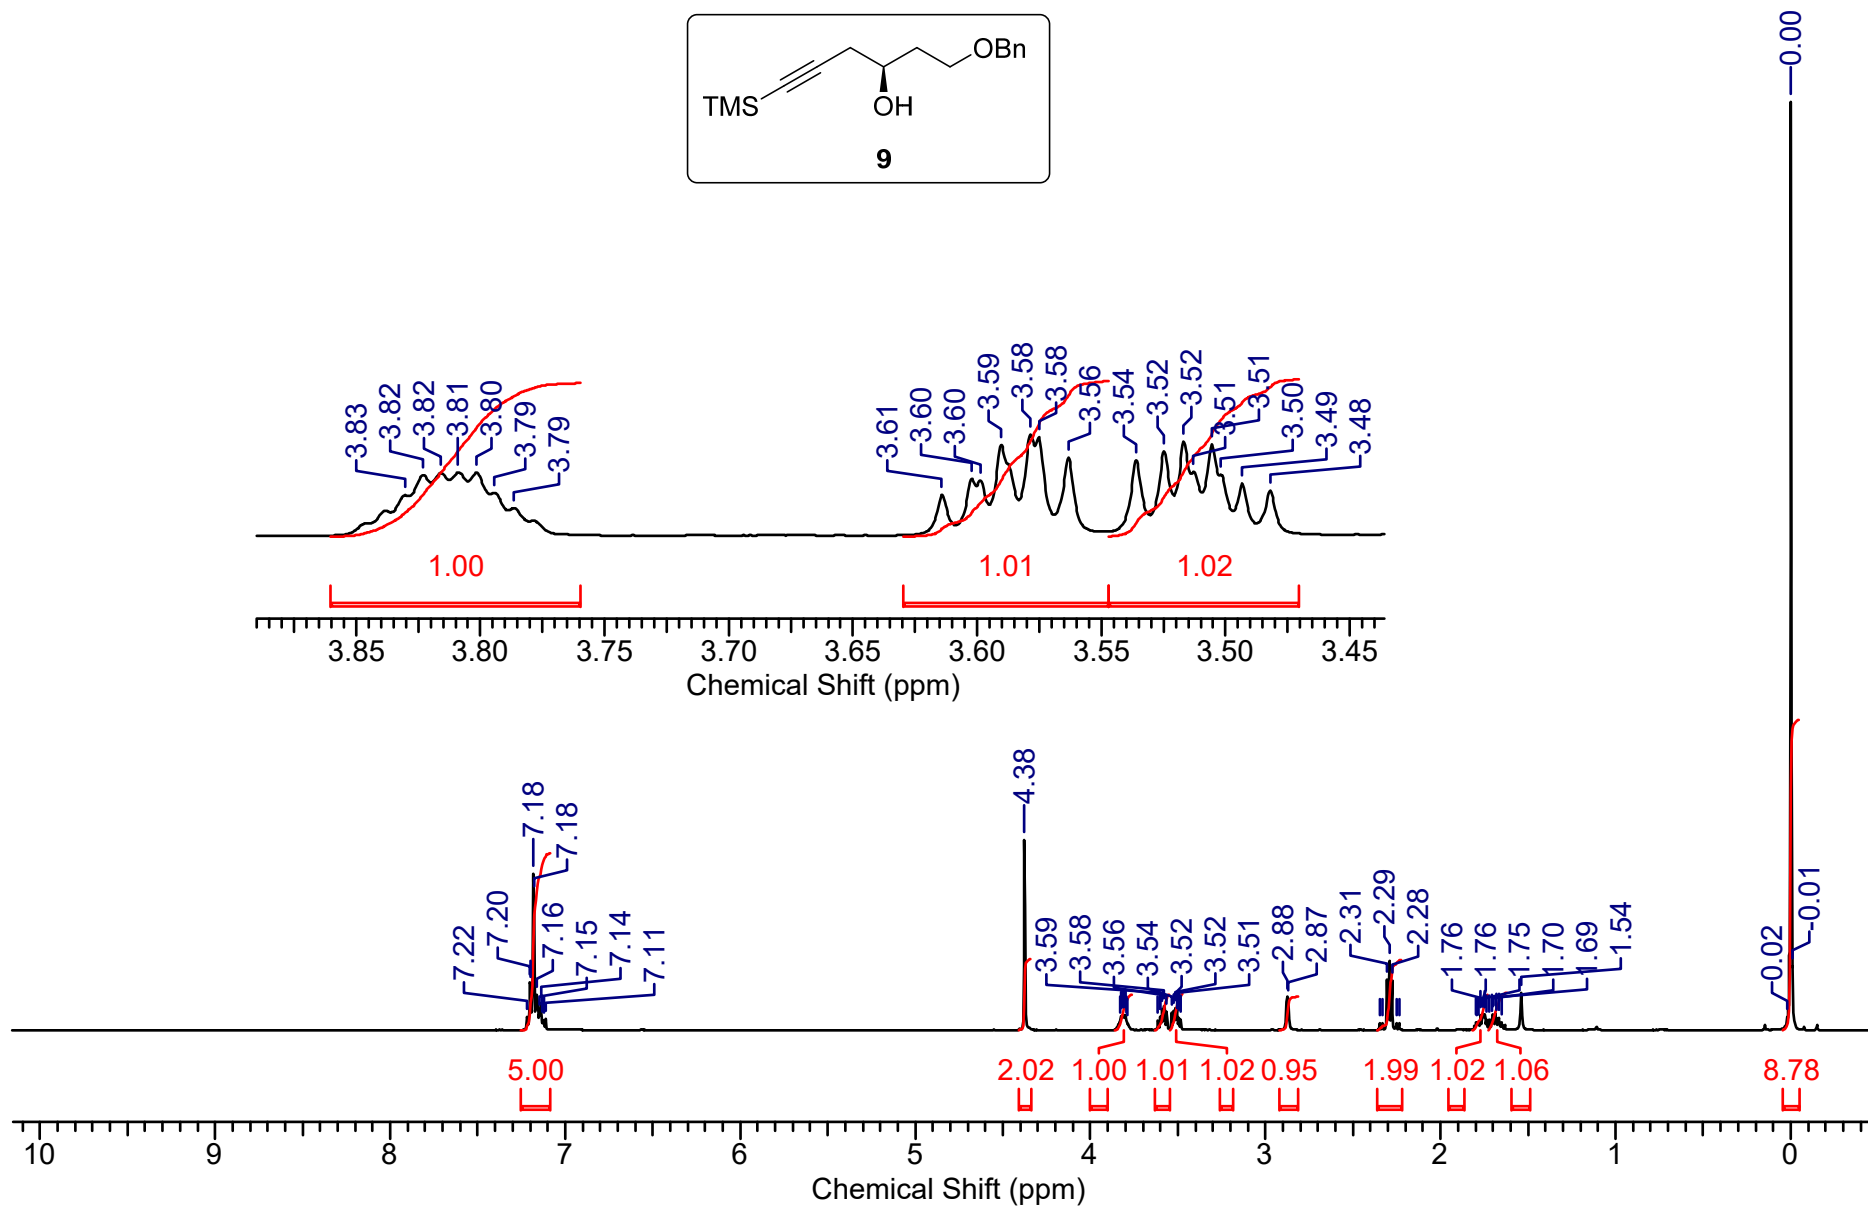

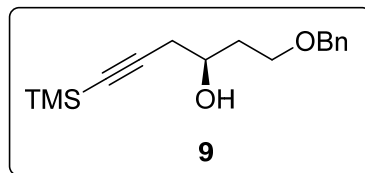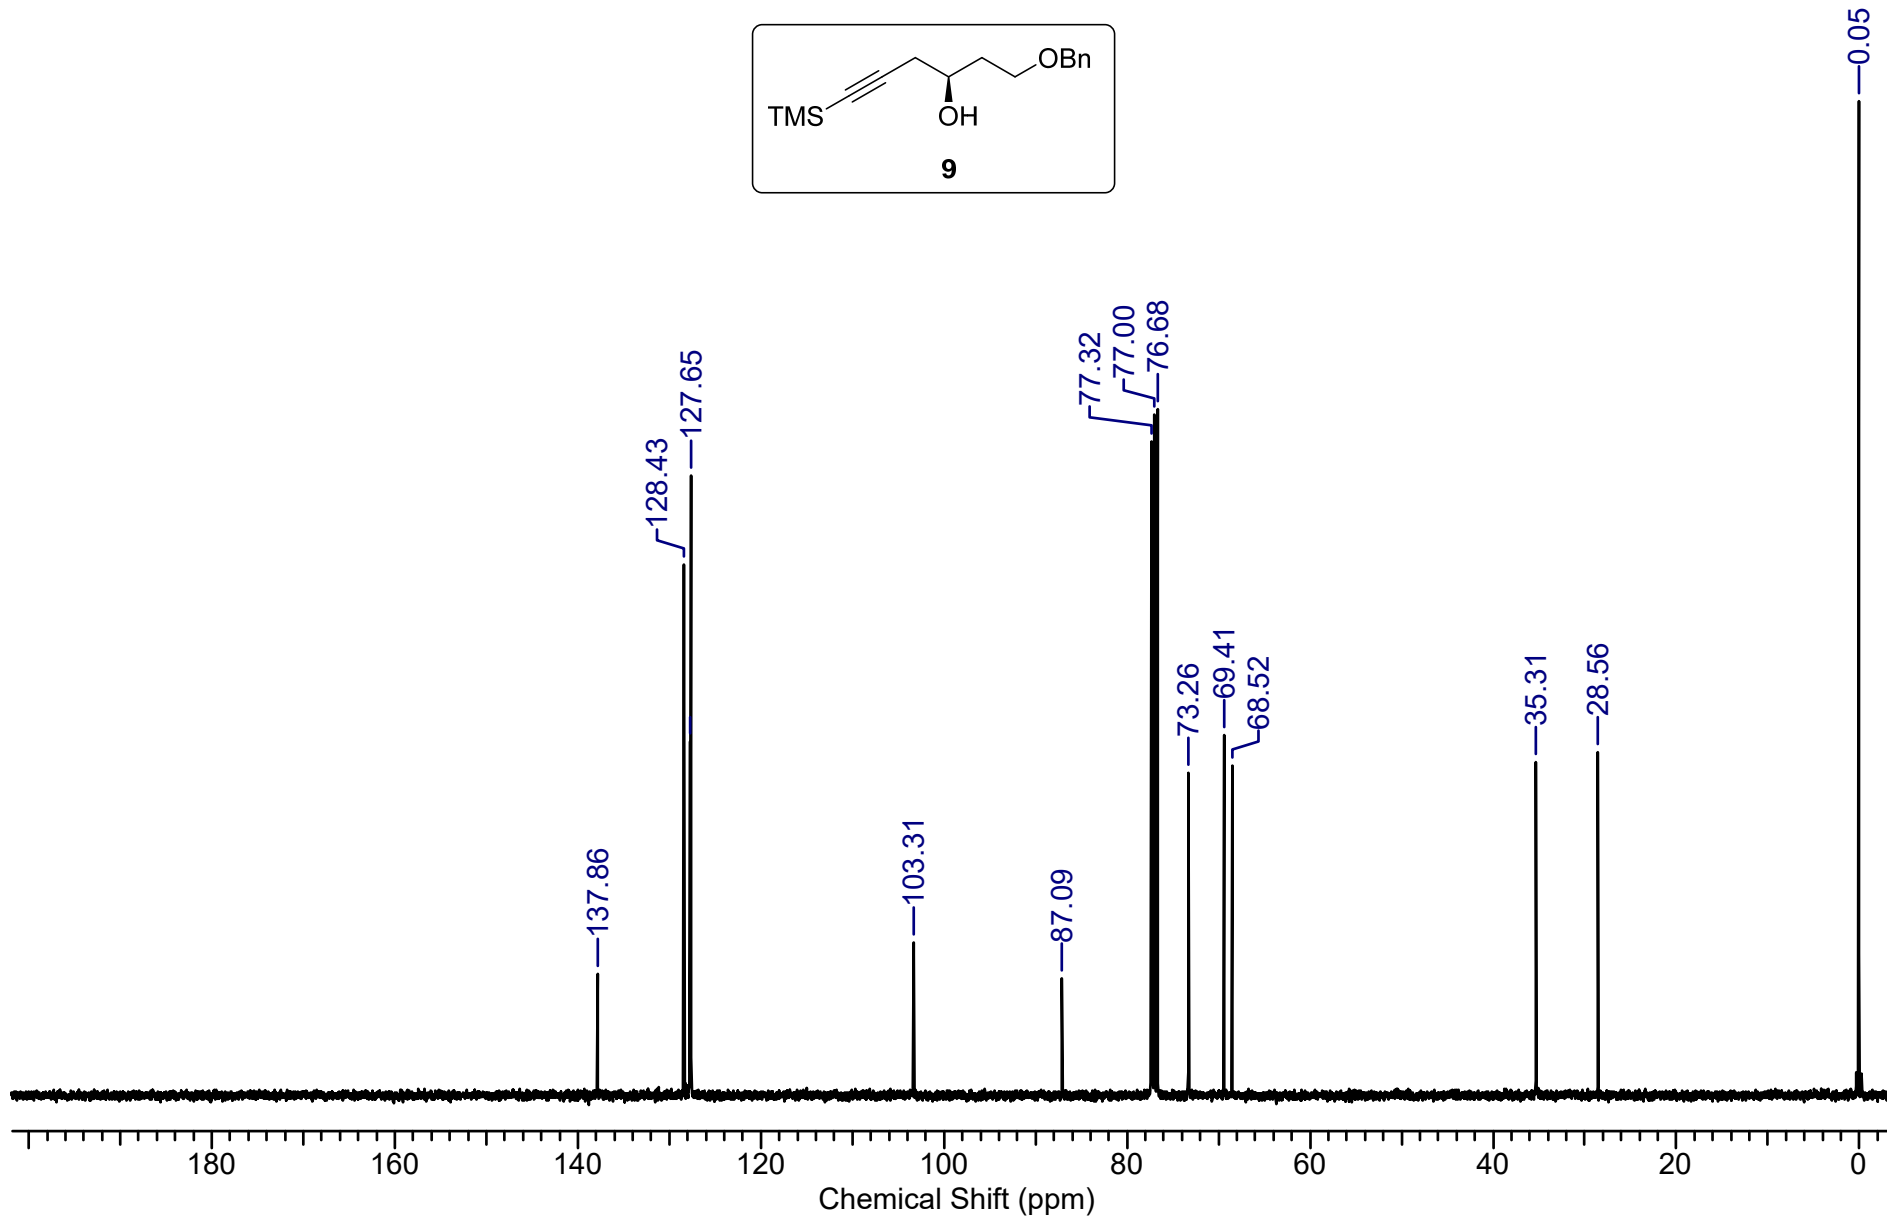

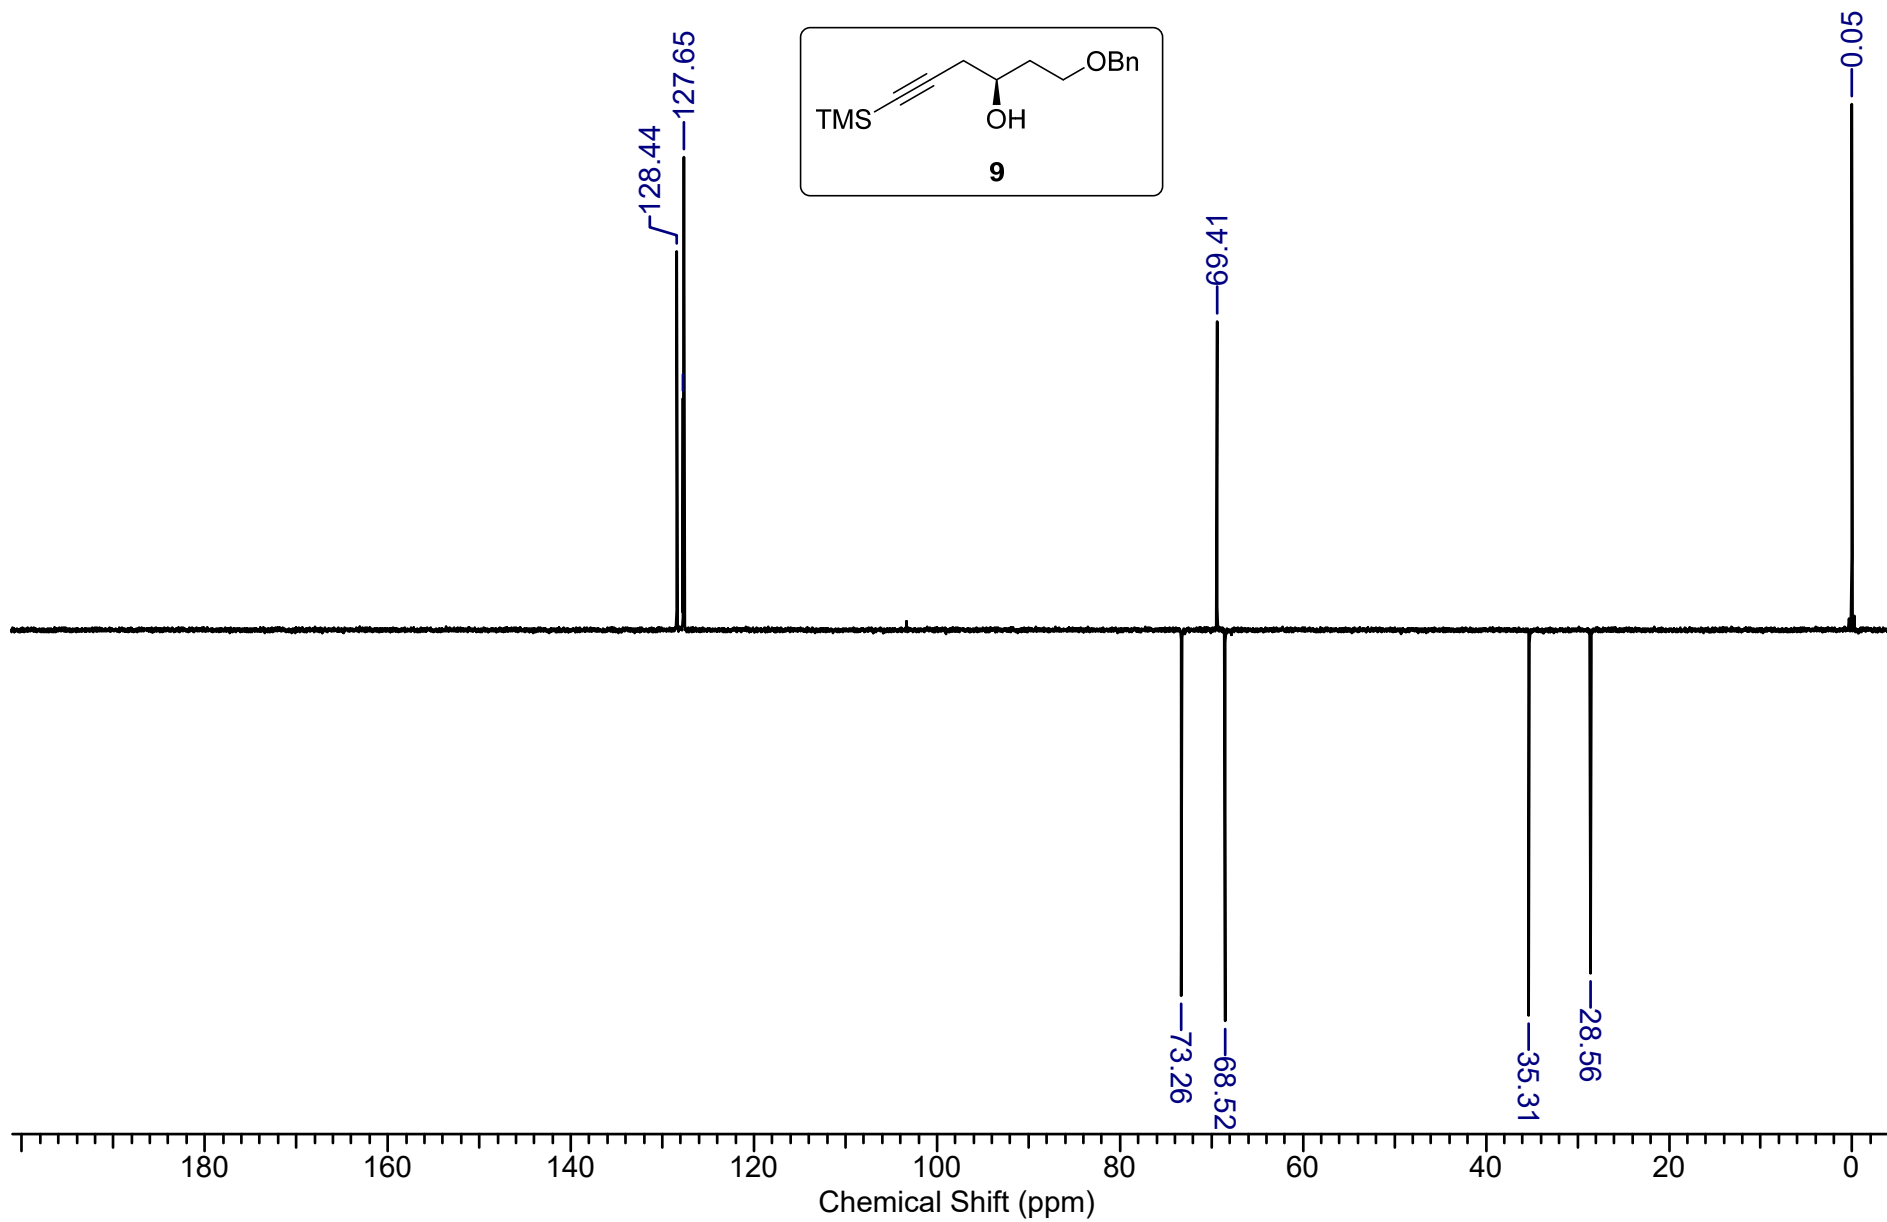

MS-2 #490 RT: 2.88 AV: 1 NL: 6.15E8  
T: FTMS + p ESI Full ms [100.0000-1500.0000]

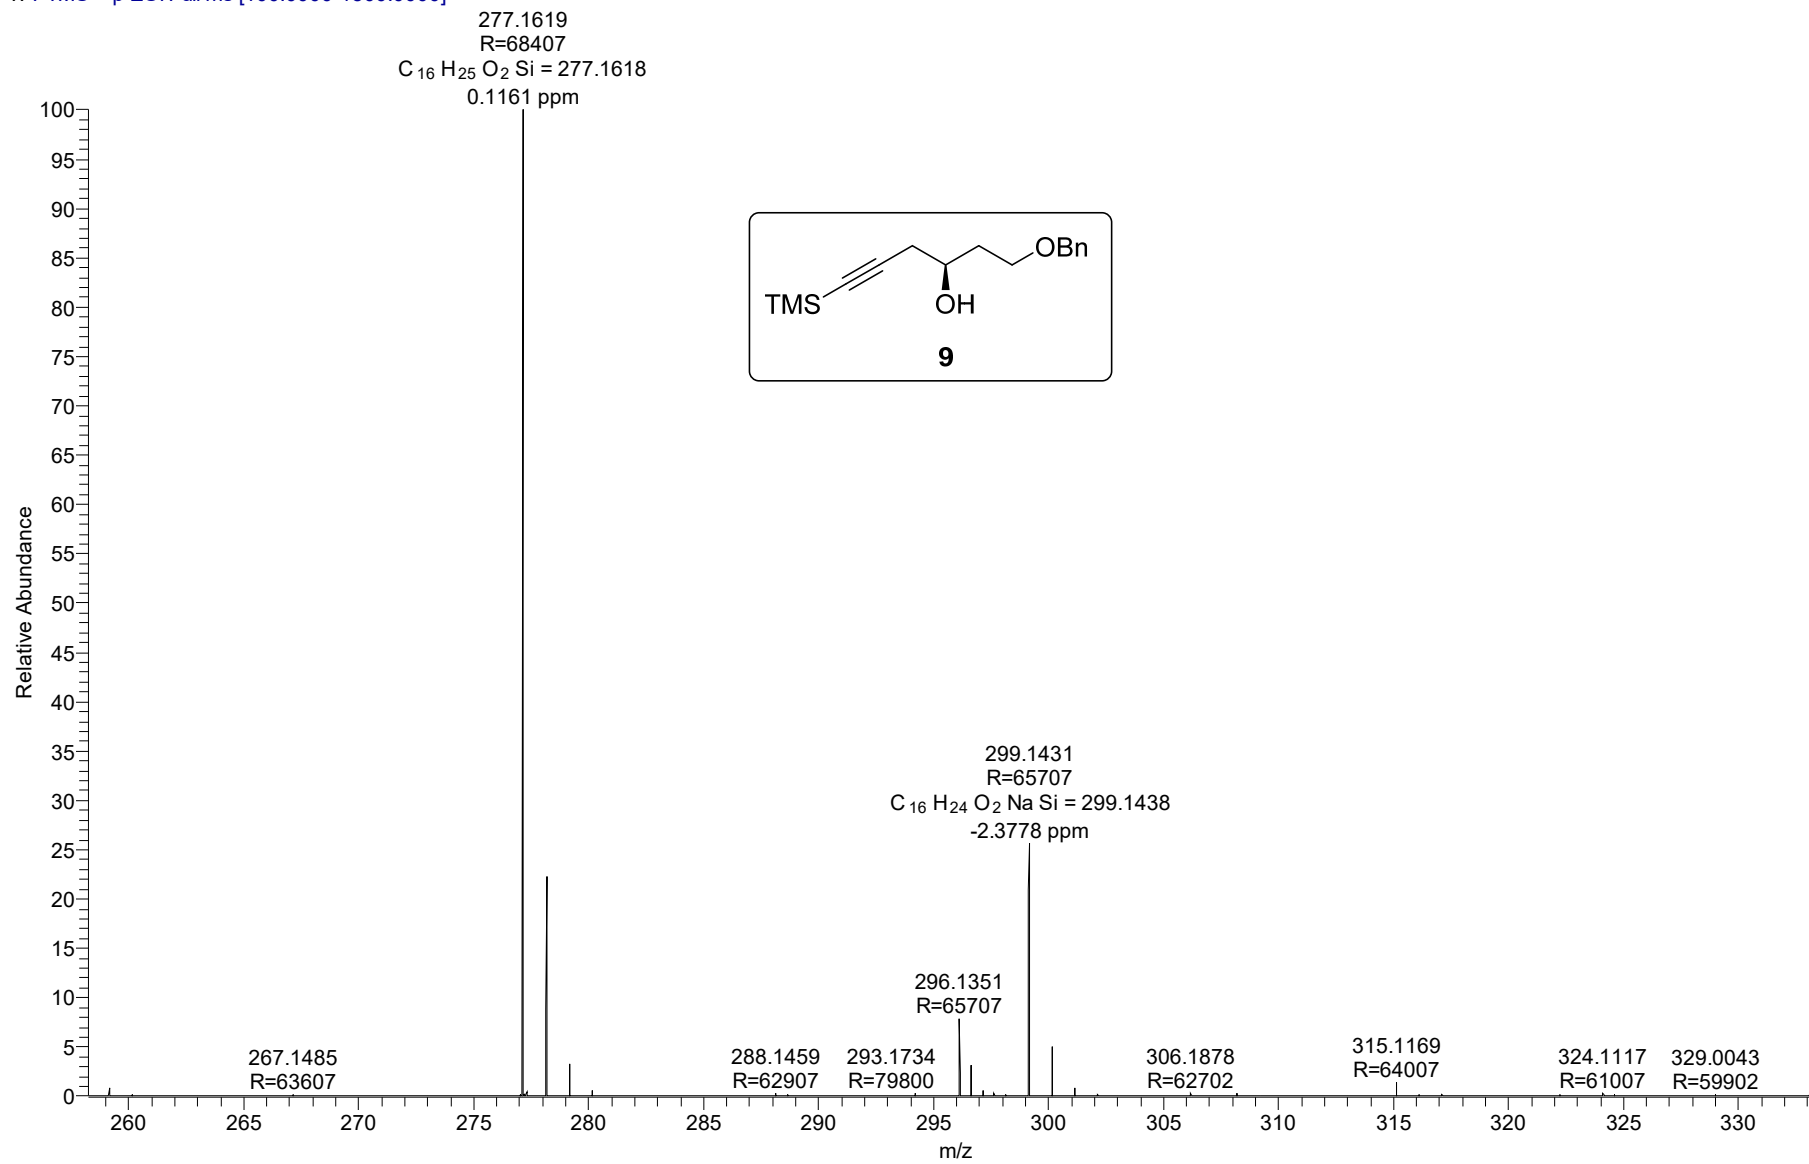

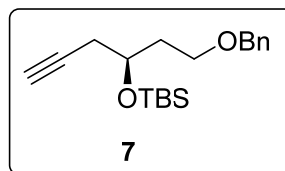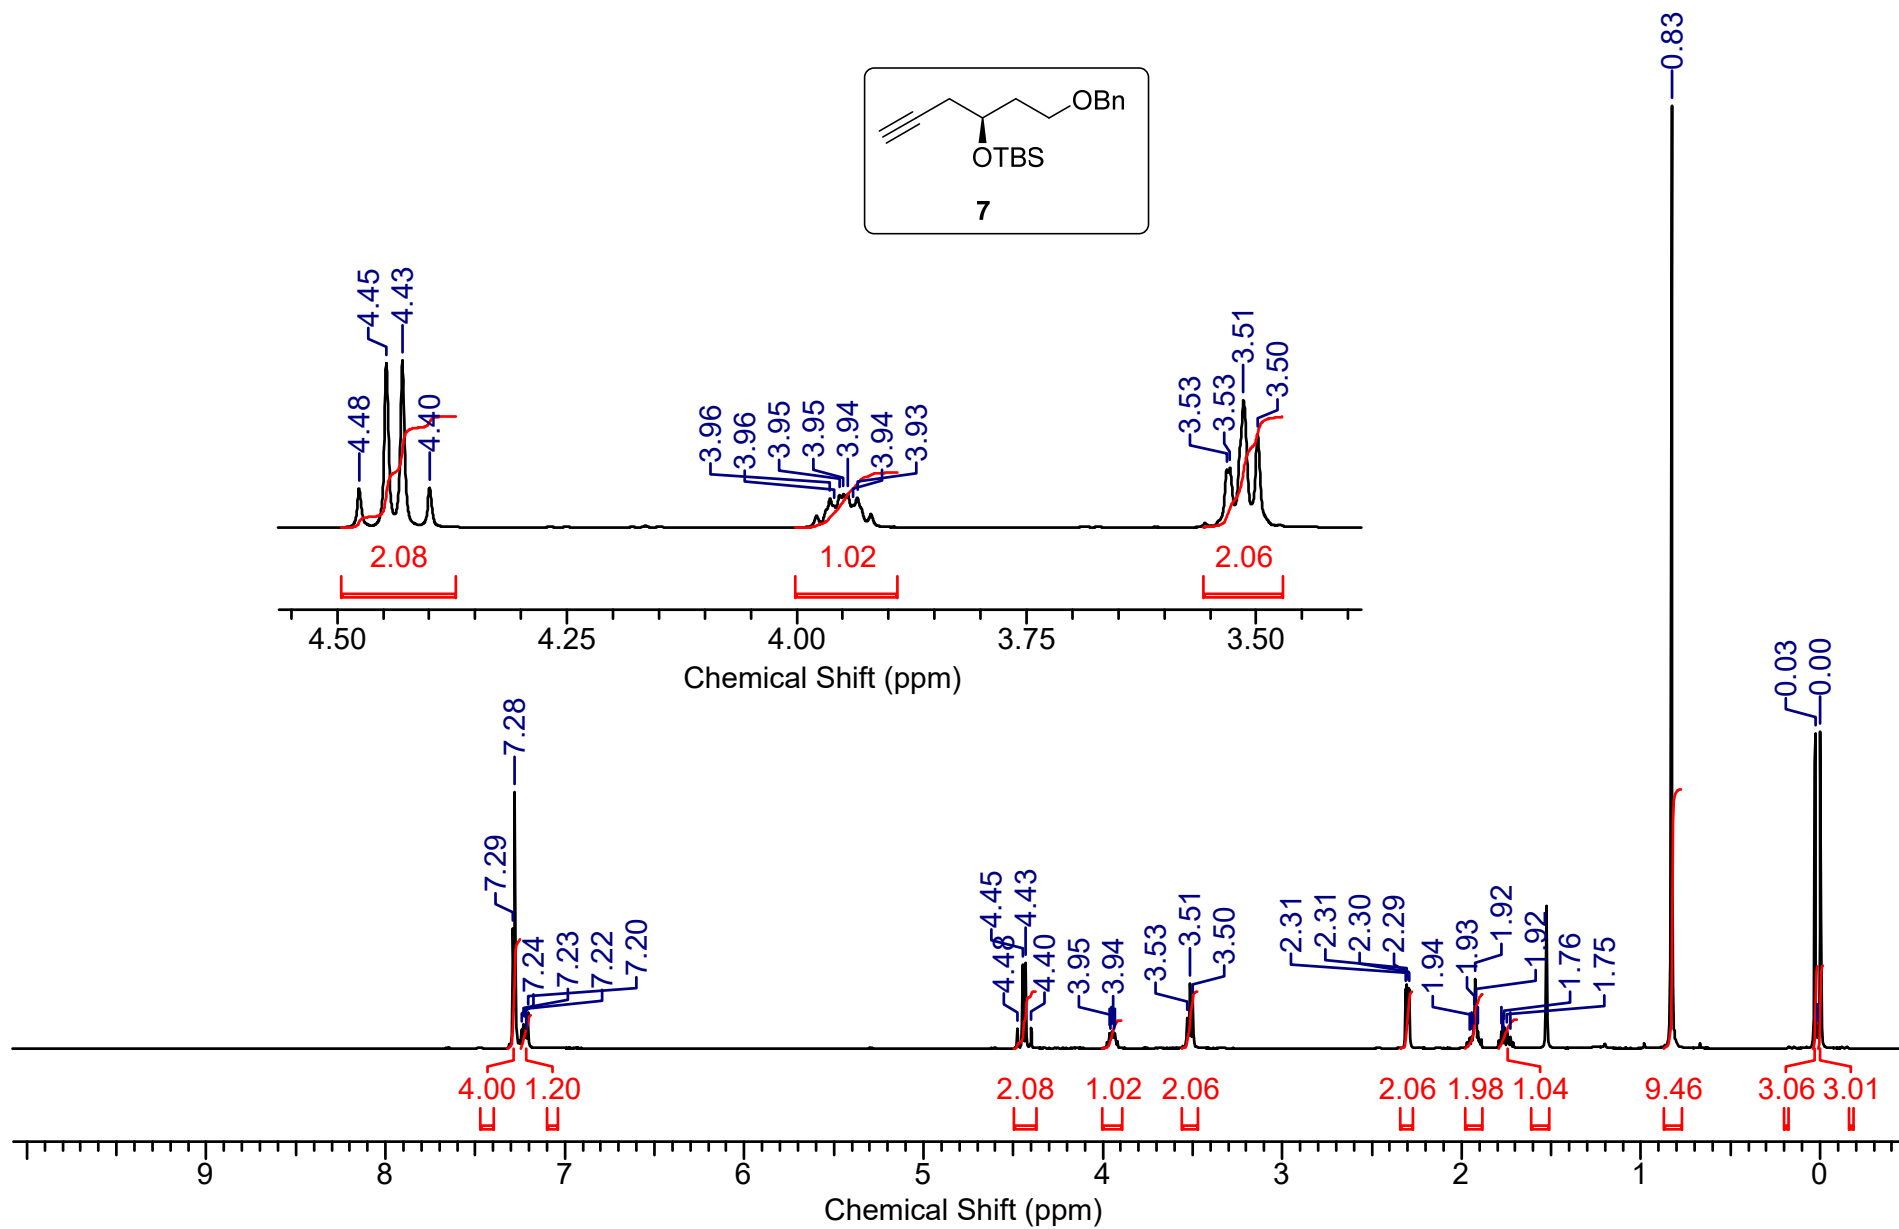

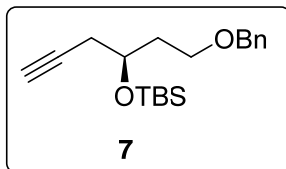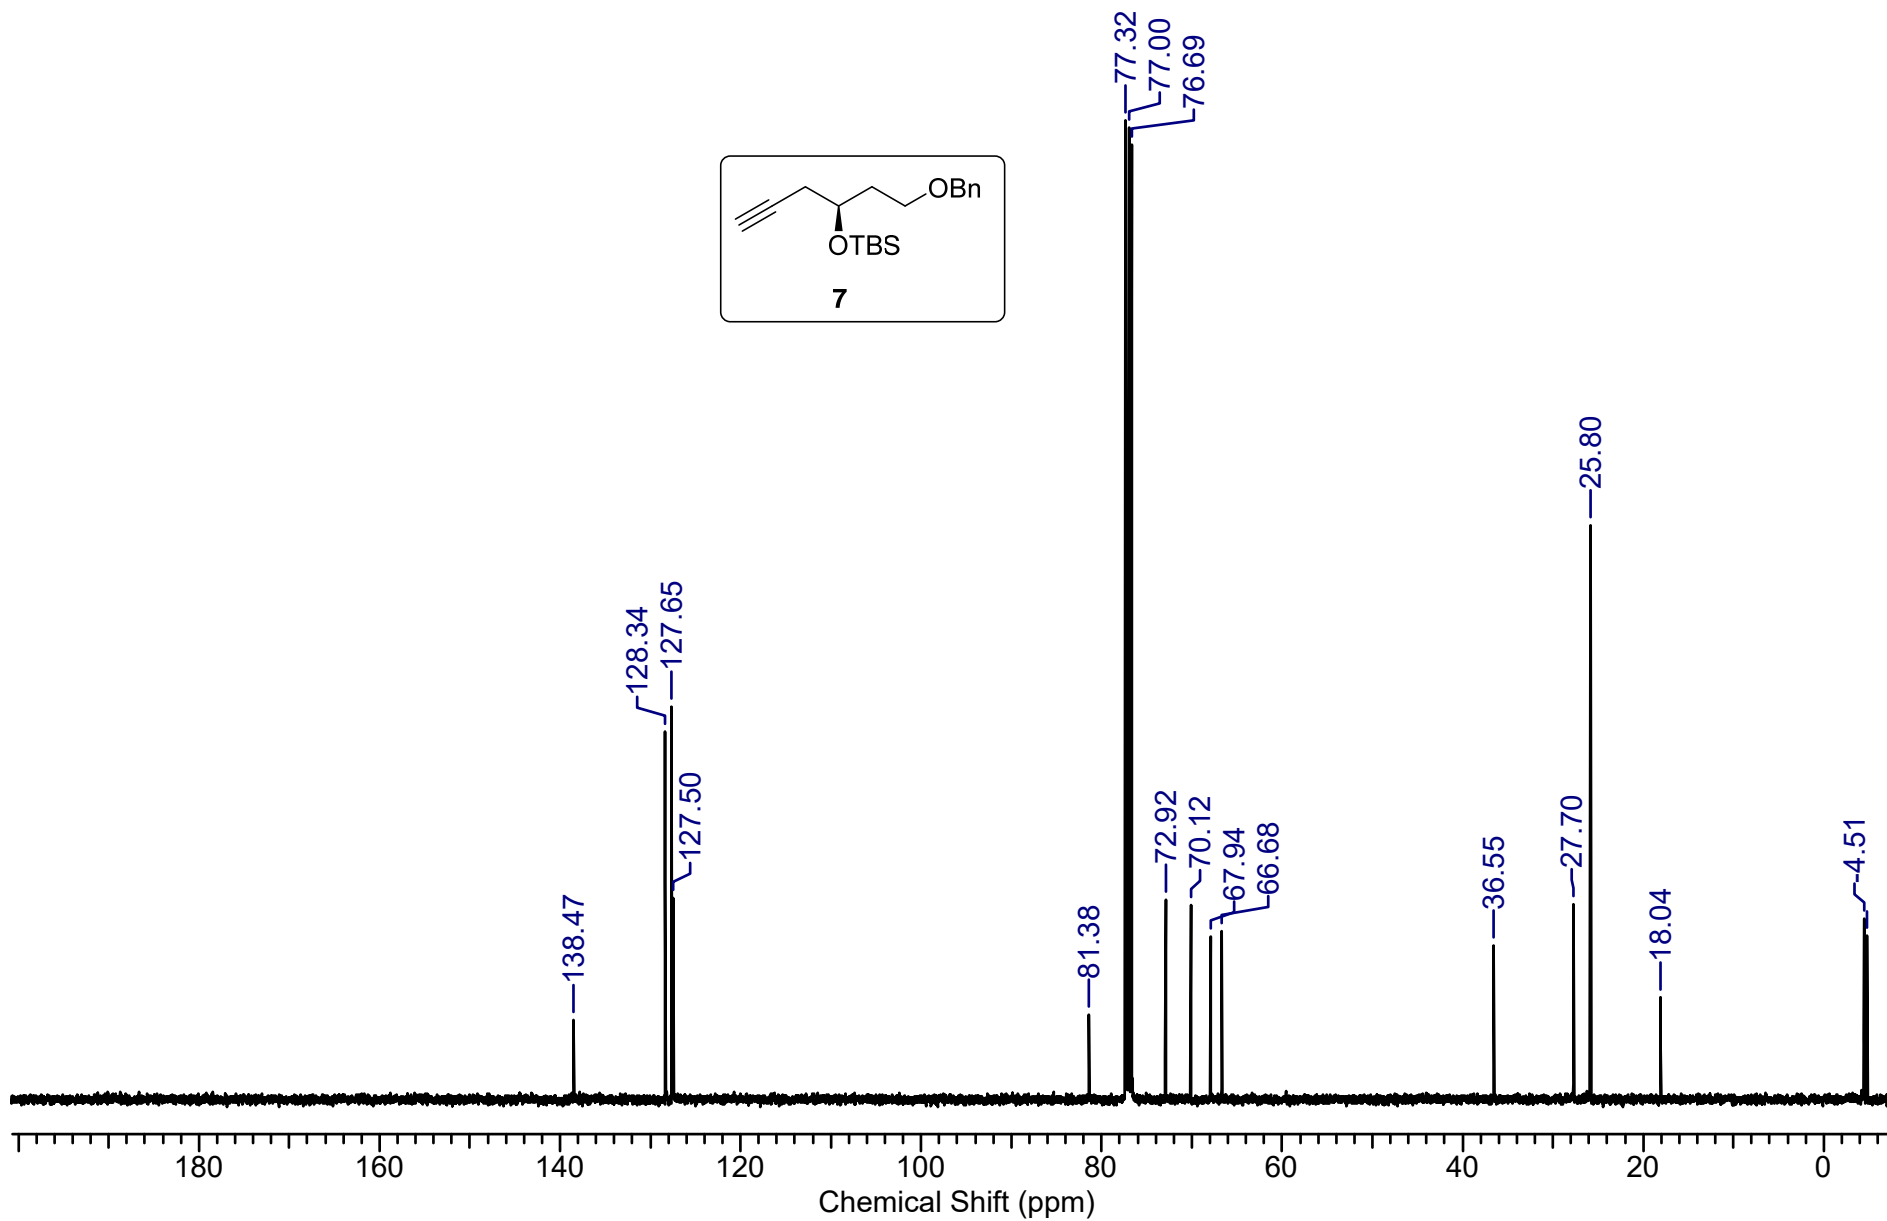



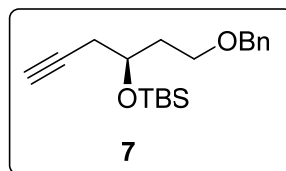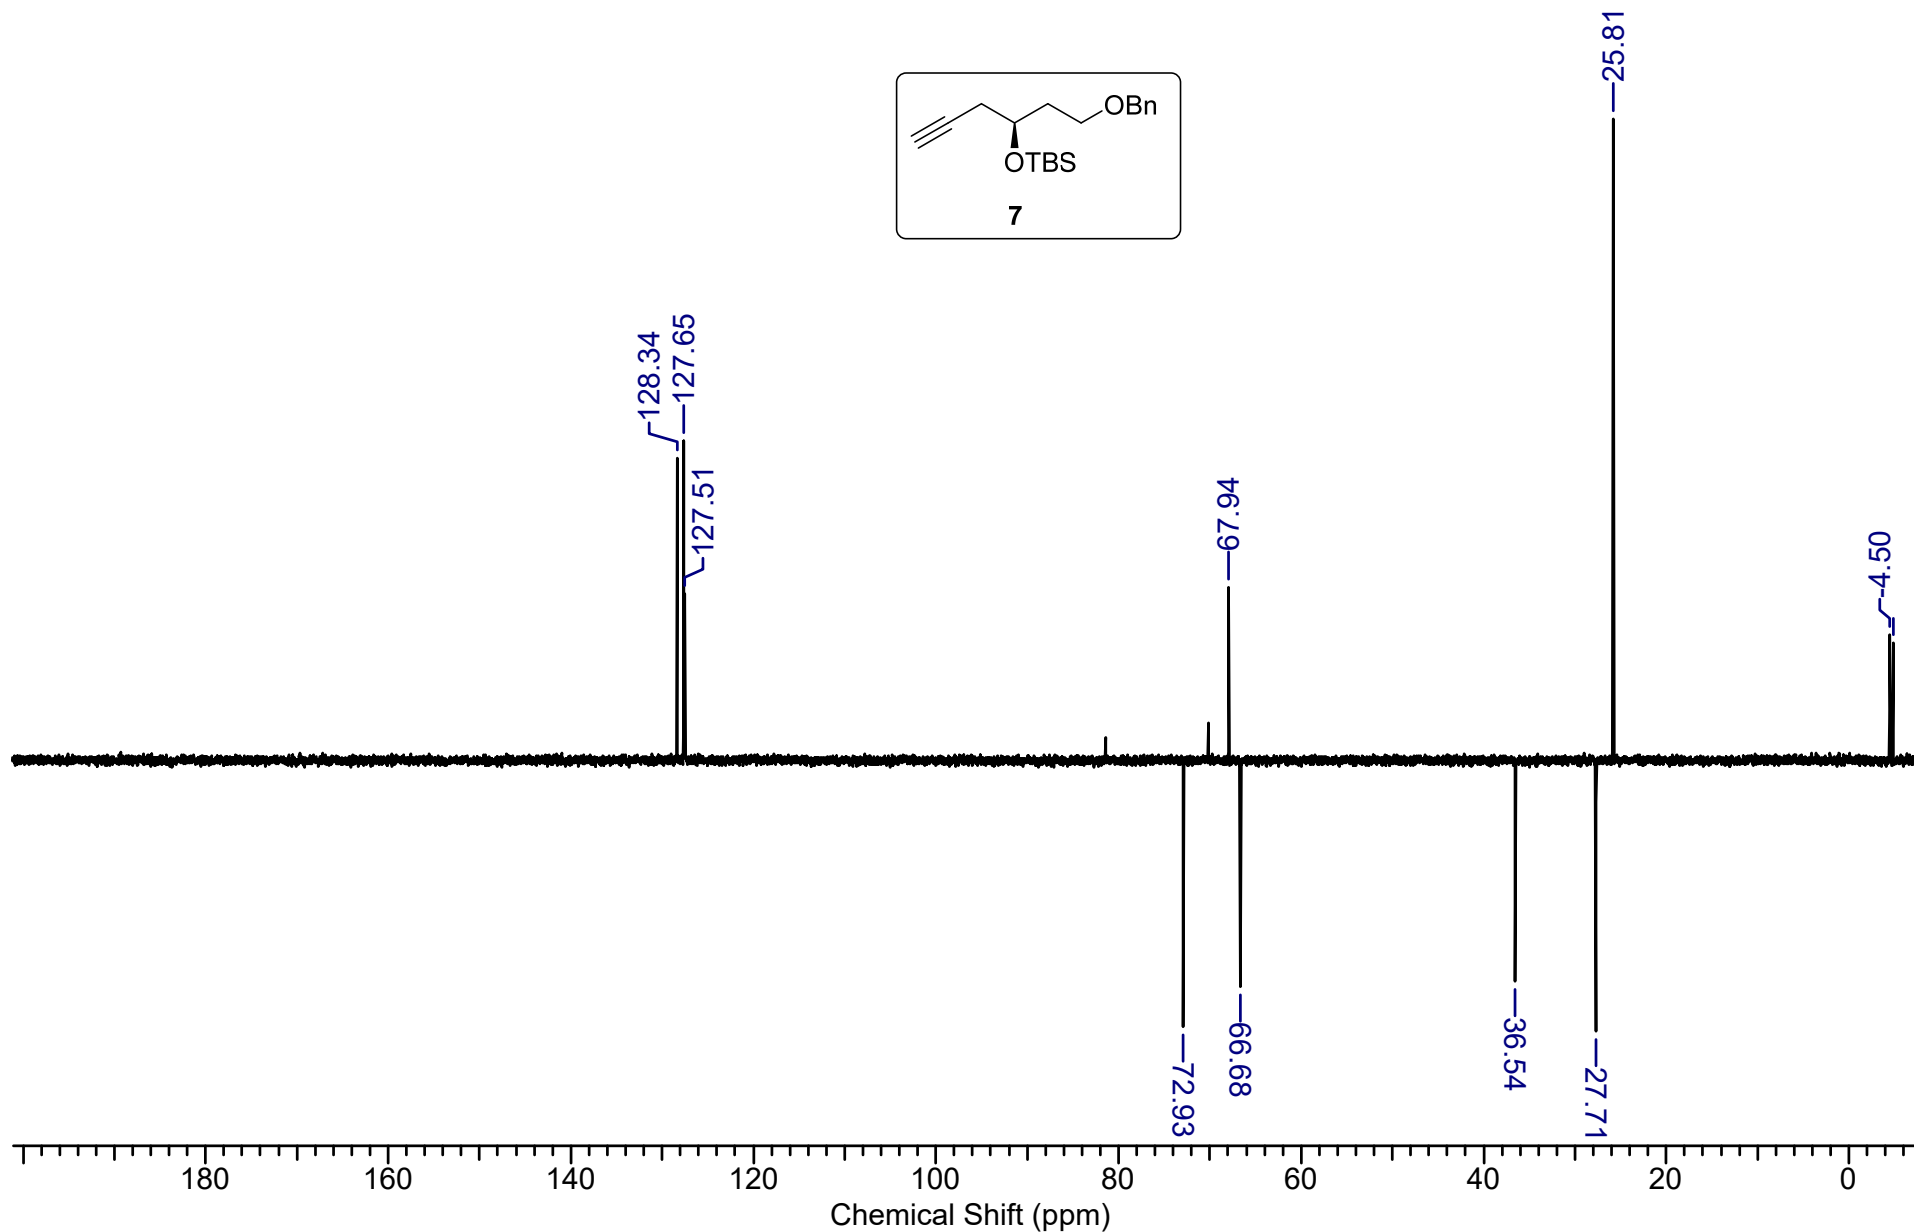

VVK 1 1 (0.052) AM2 (Ar,10000.0,556.28,0.00,LS 3); ABS; Sm (SG, 3x1.00)

1: TOF MS ES+  
1.52e4

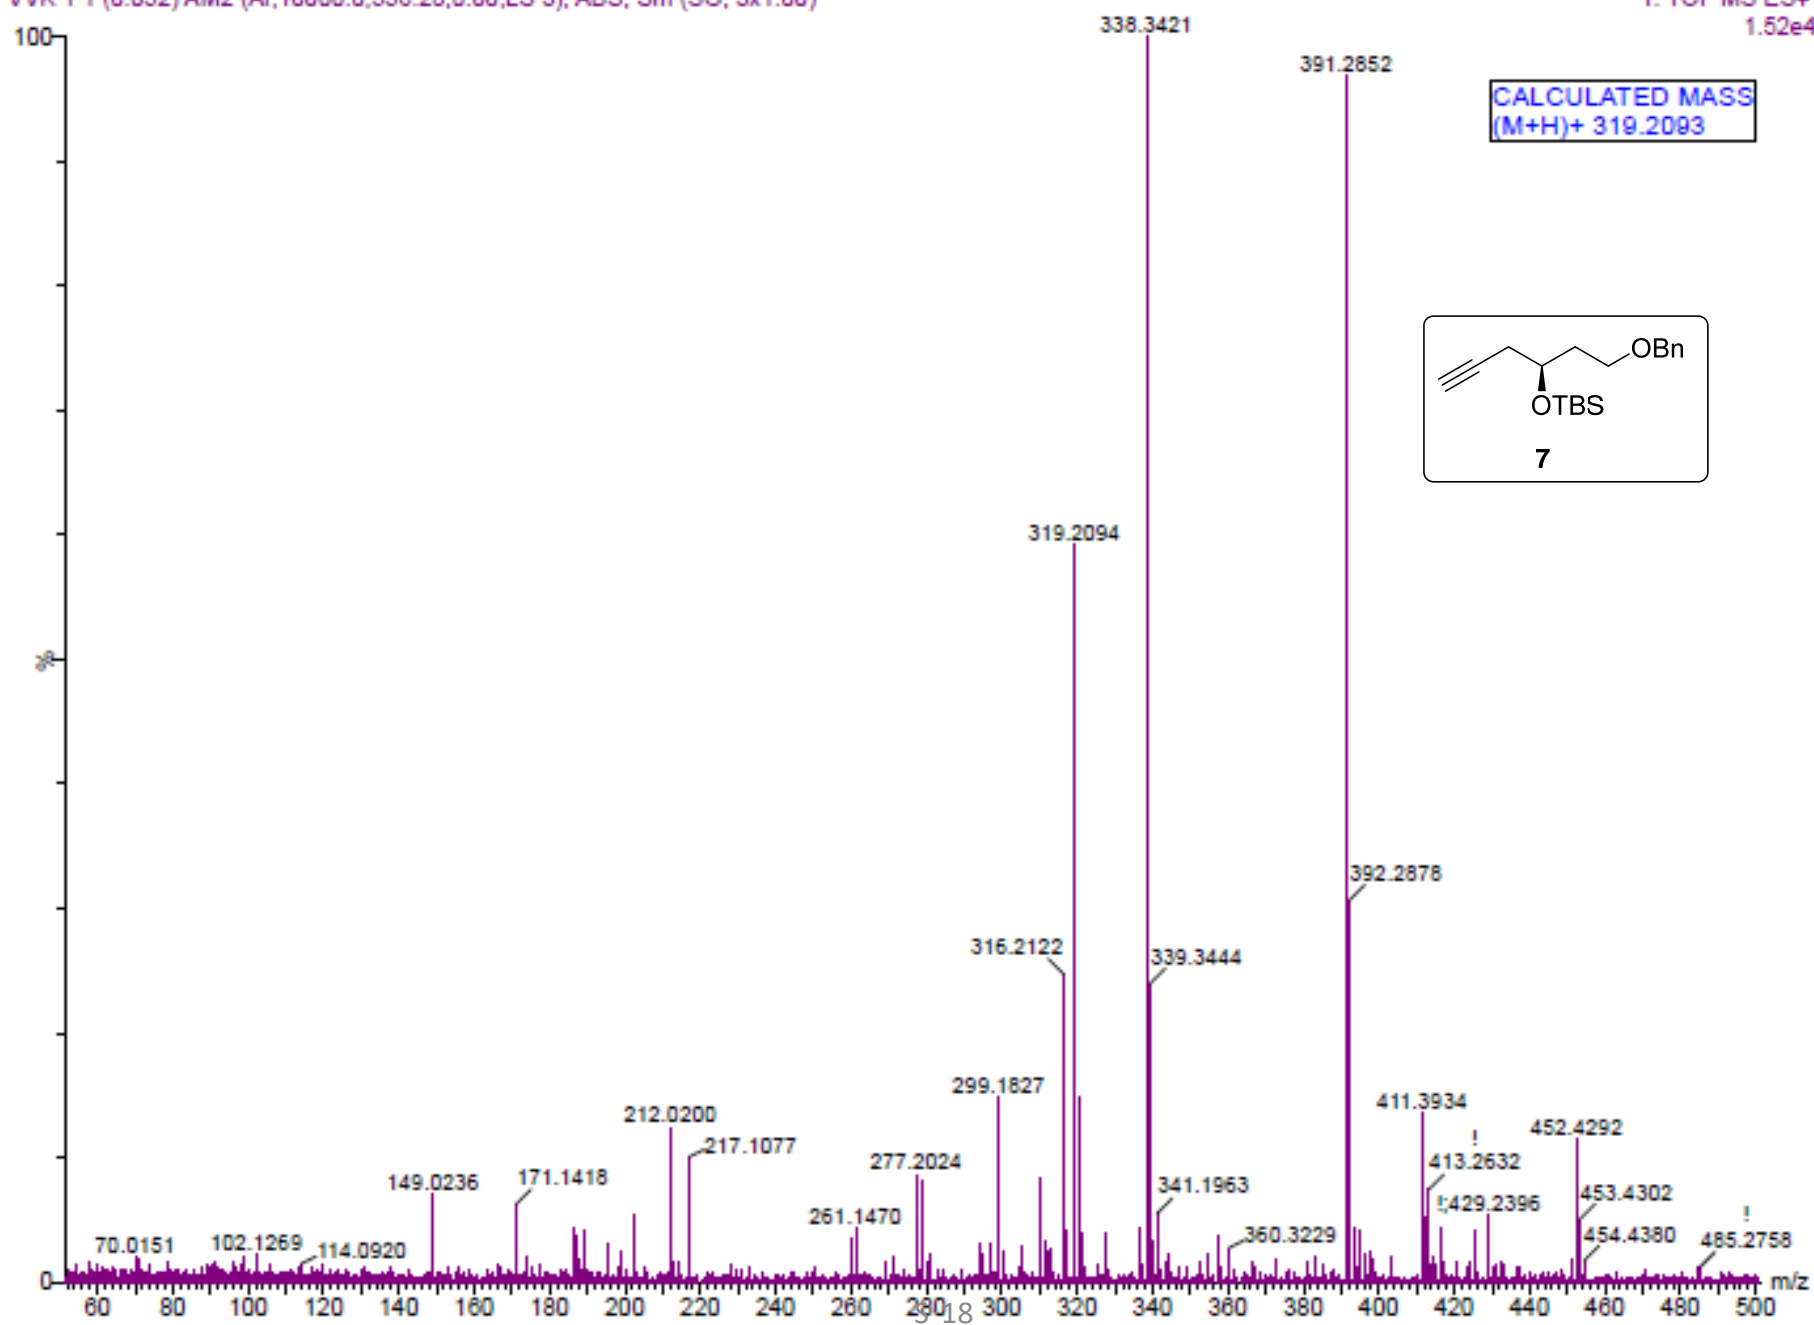

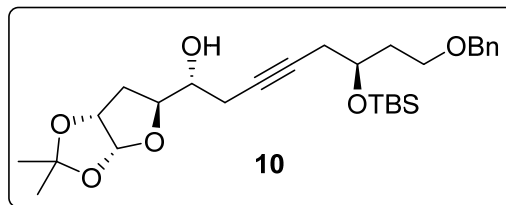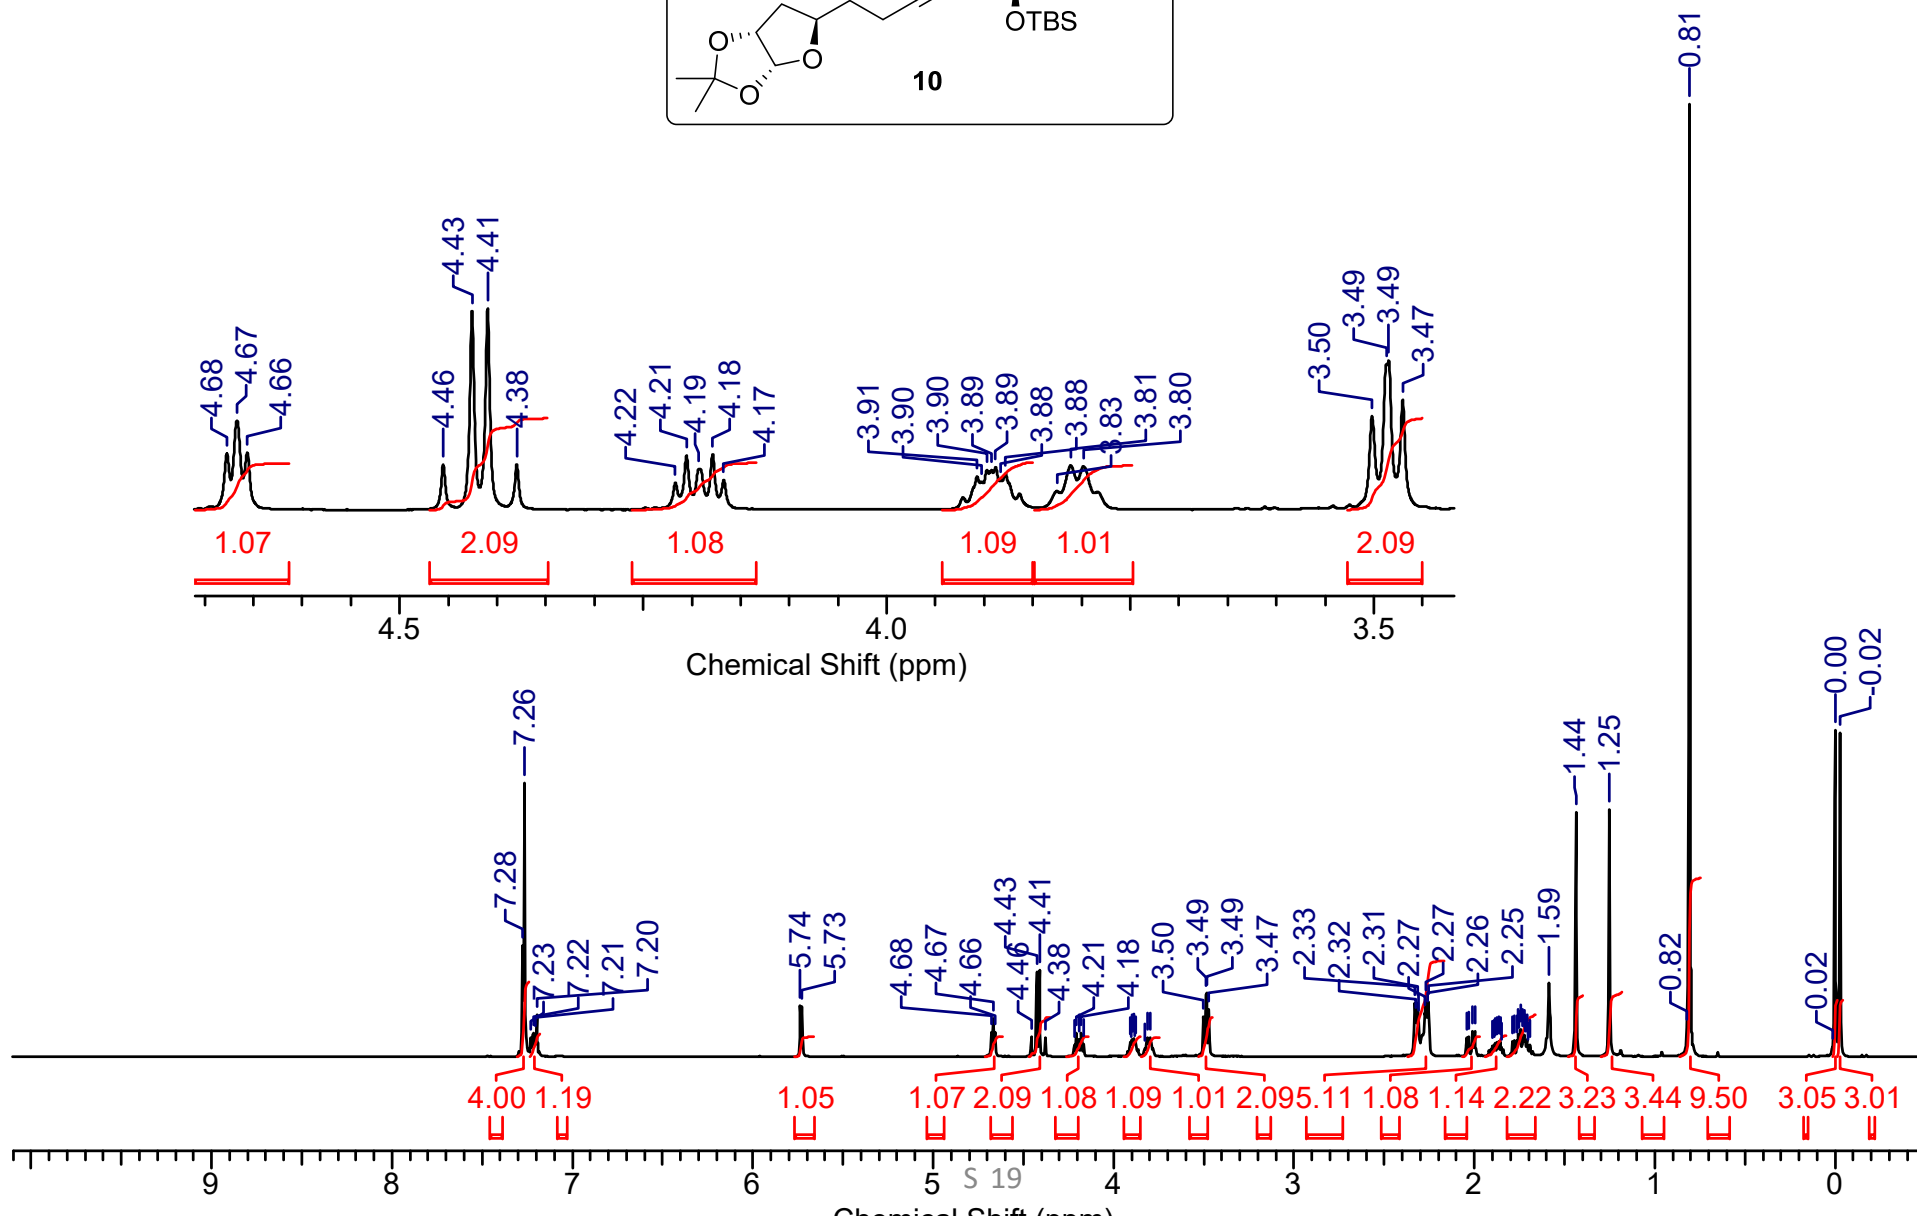

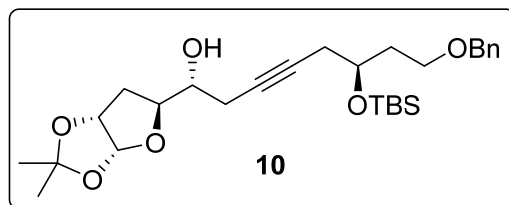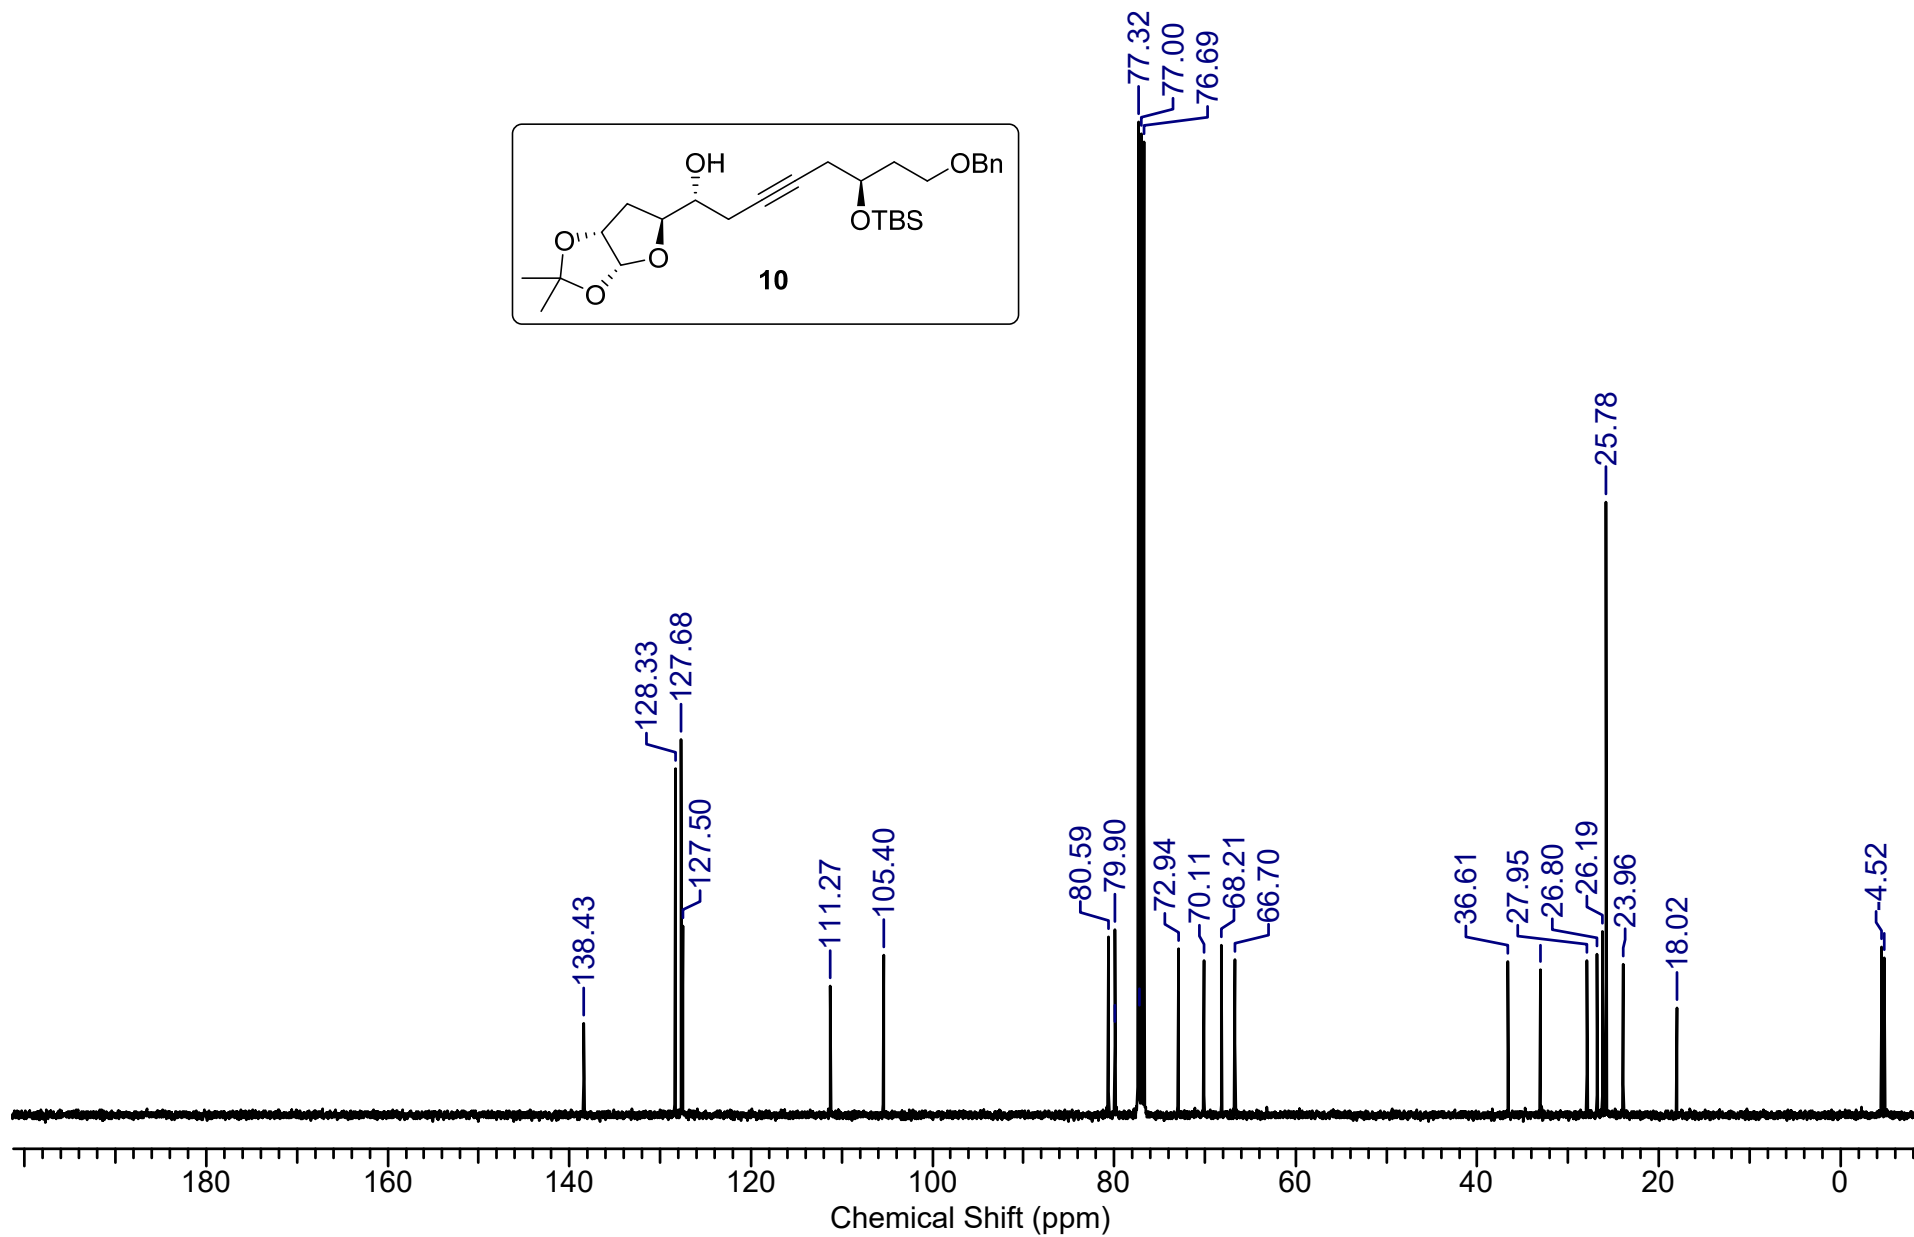

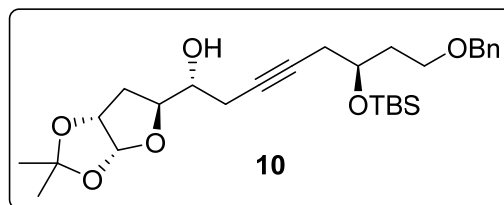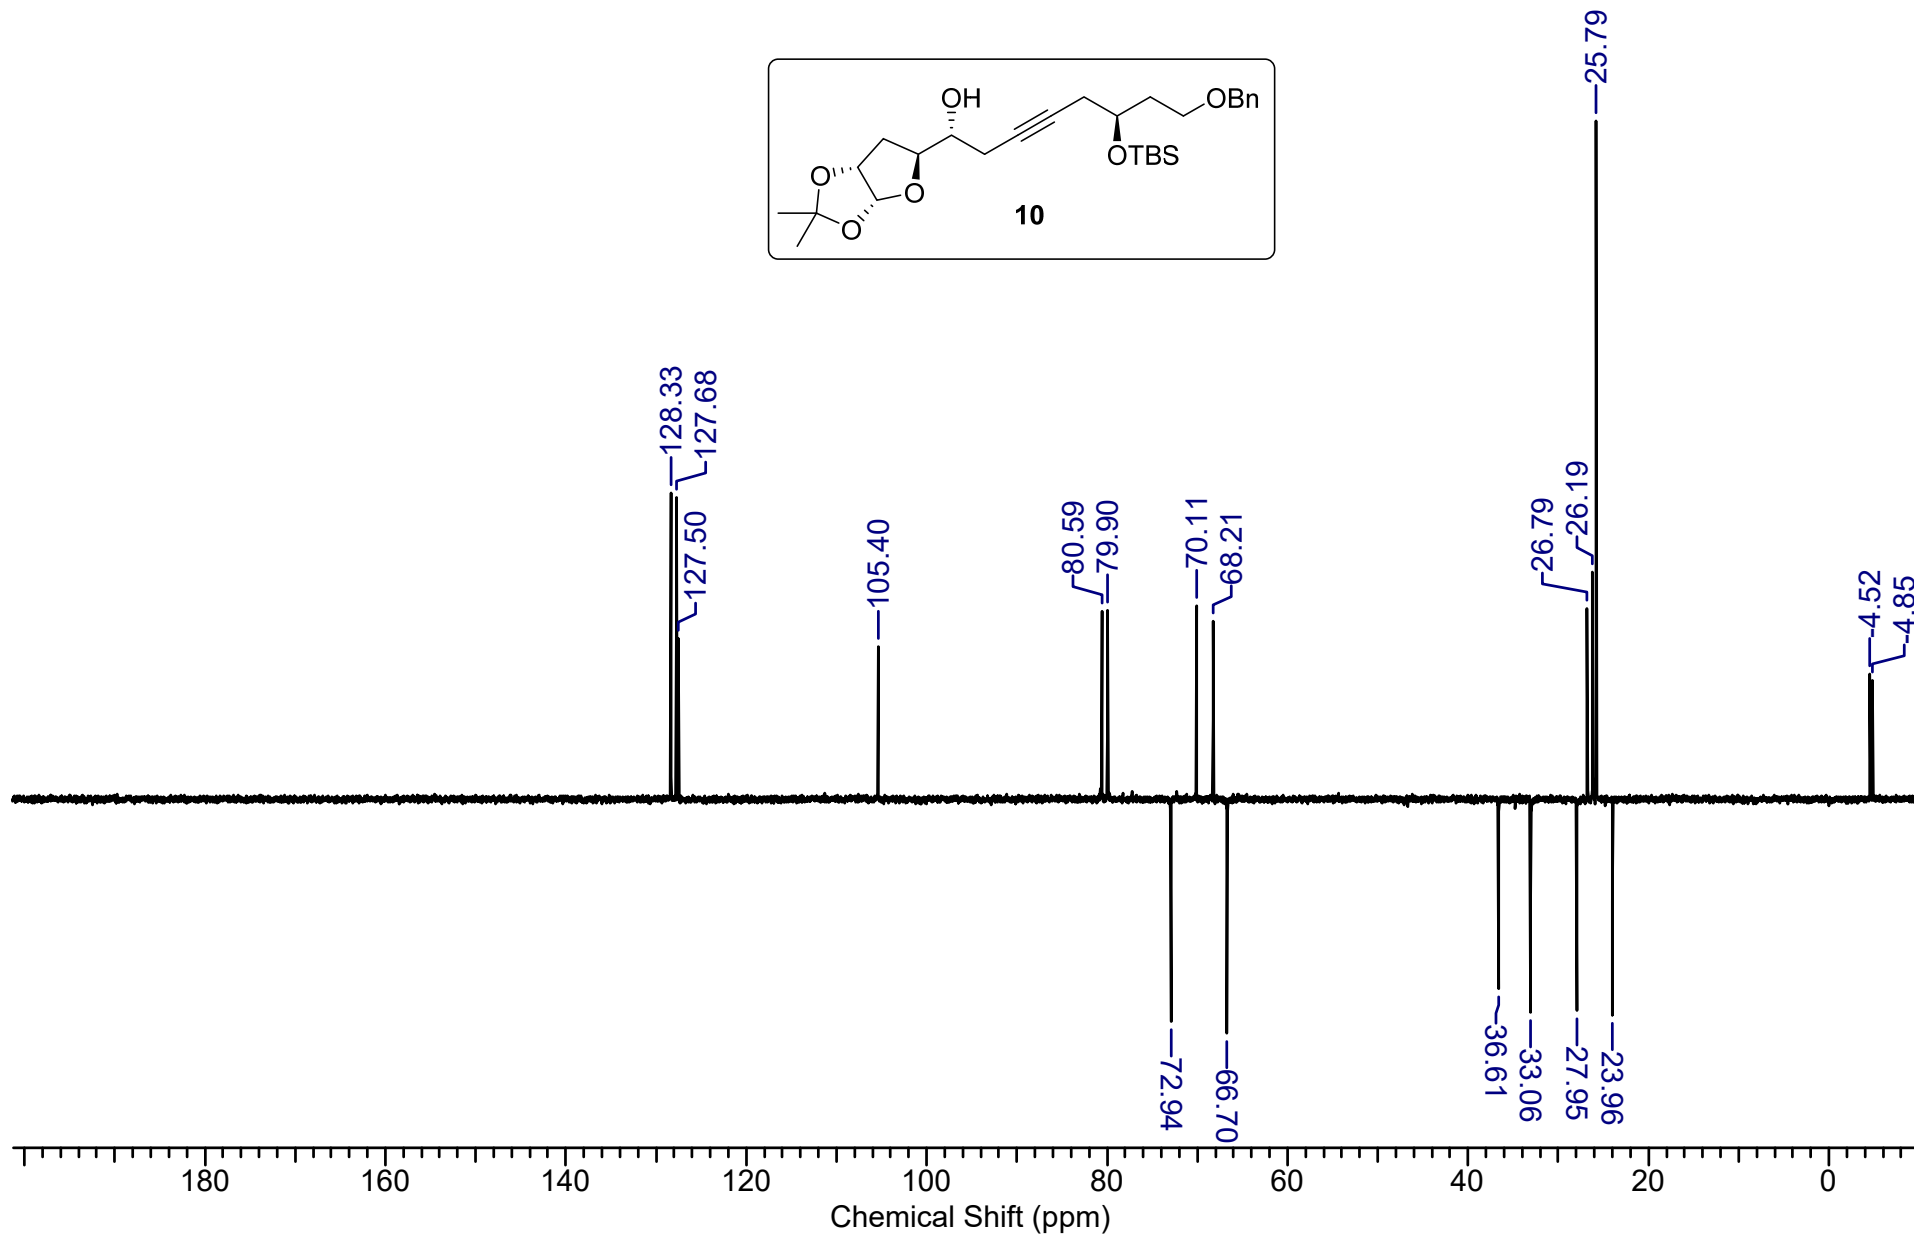

MS-6\_210107140423 #641 RT: 3.94 AV: 1 NL: 1.54E8  
T: FTMS + p ESI Full ms [100.0000-1500.0000]

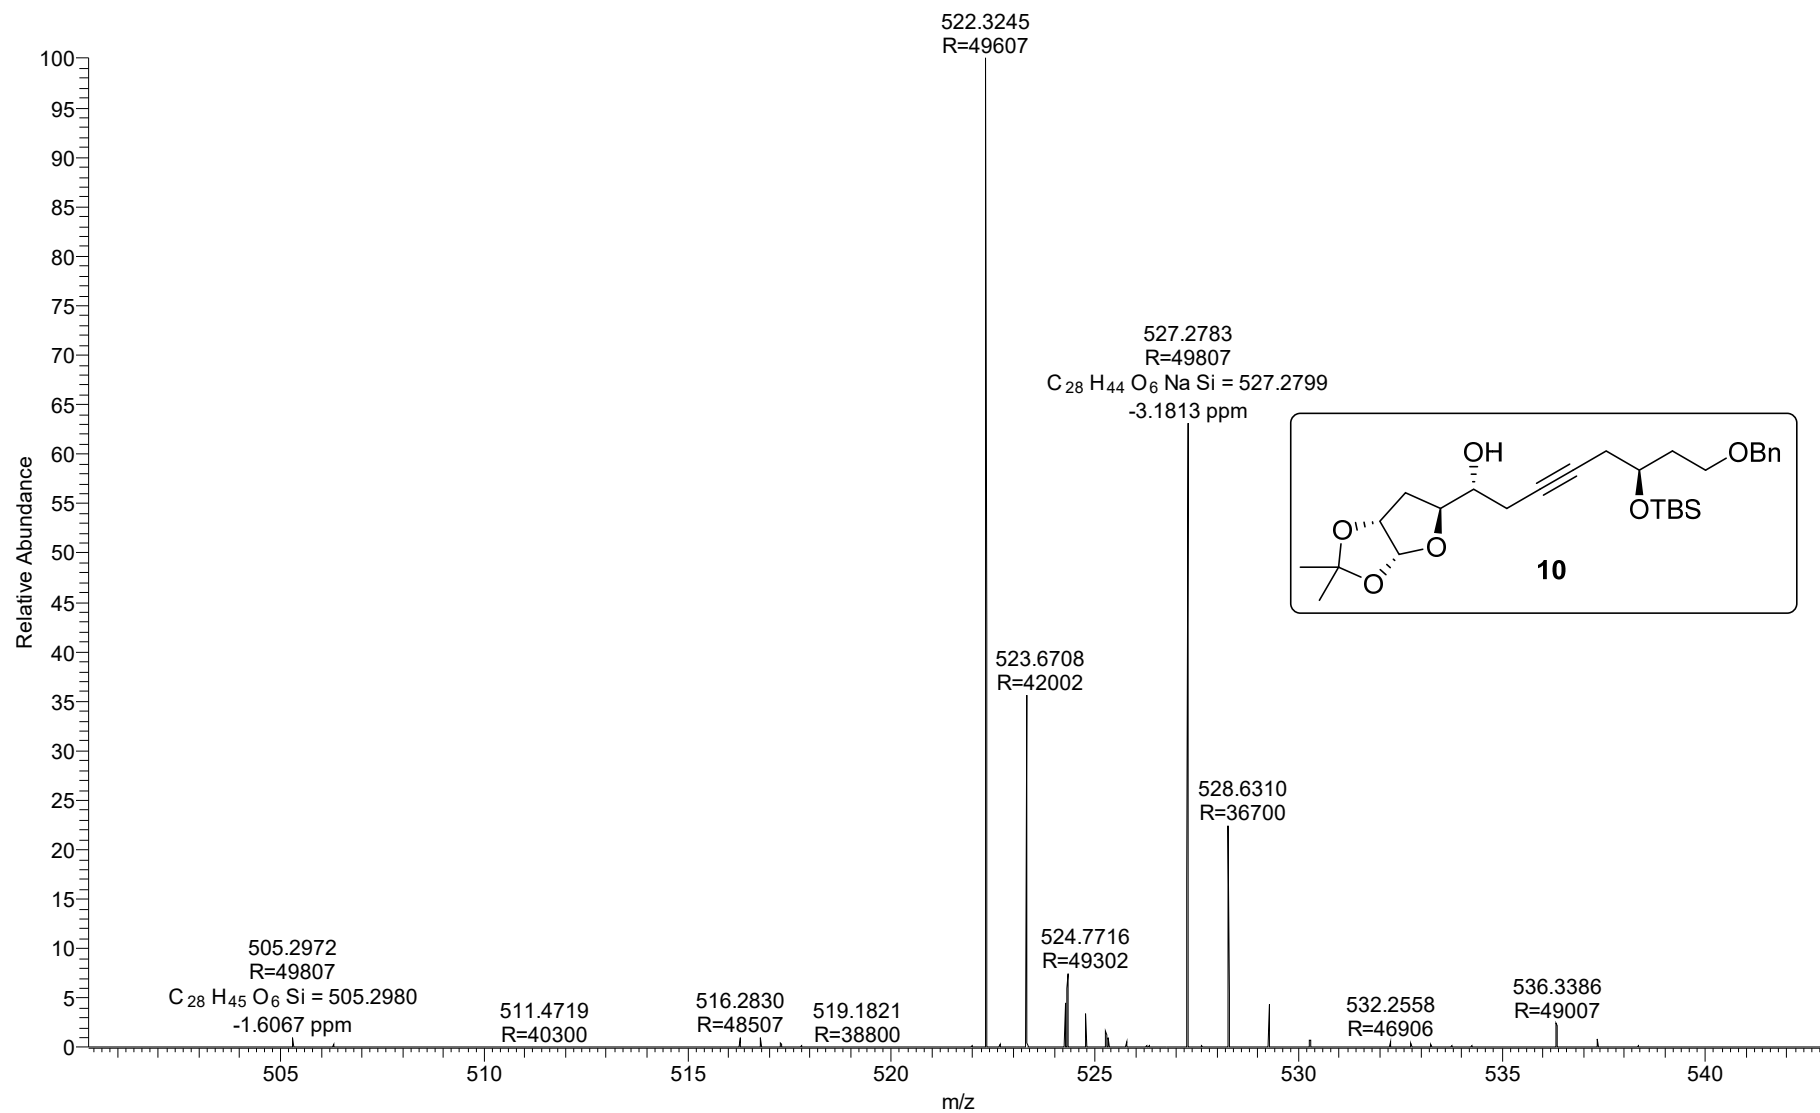

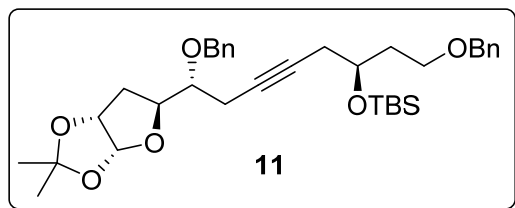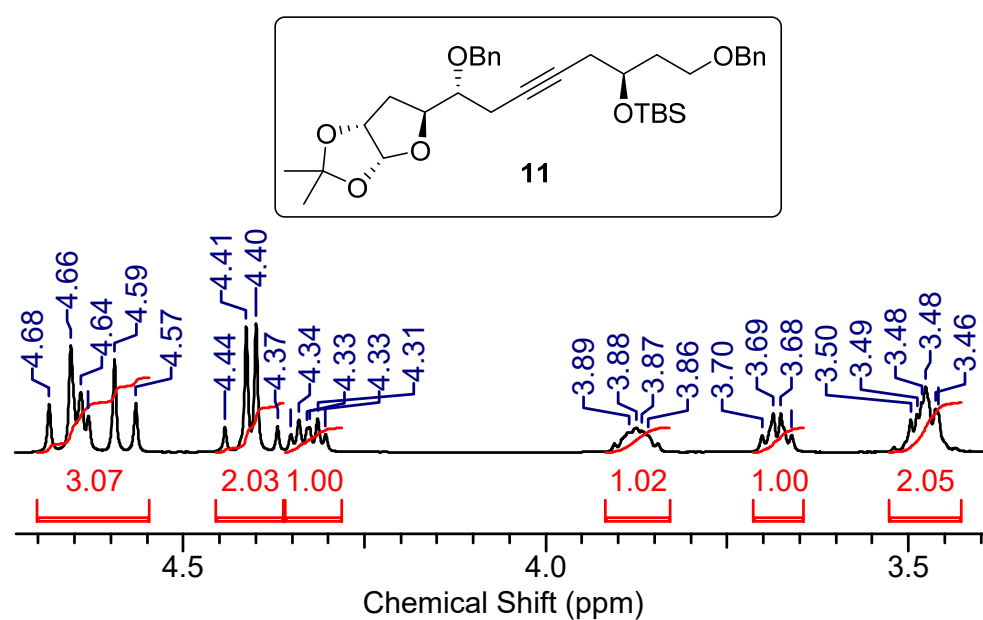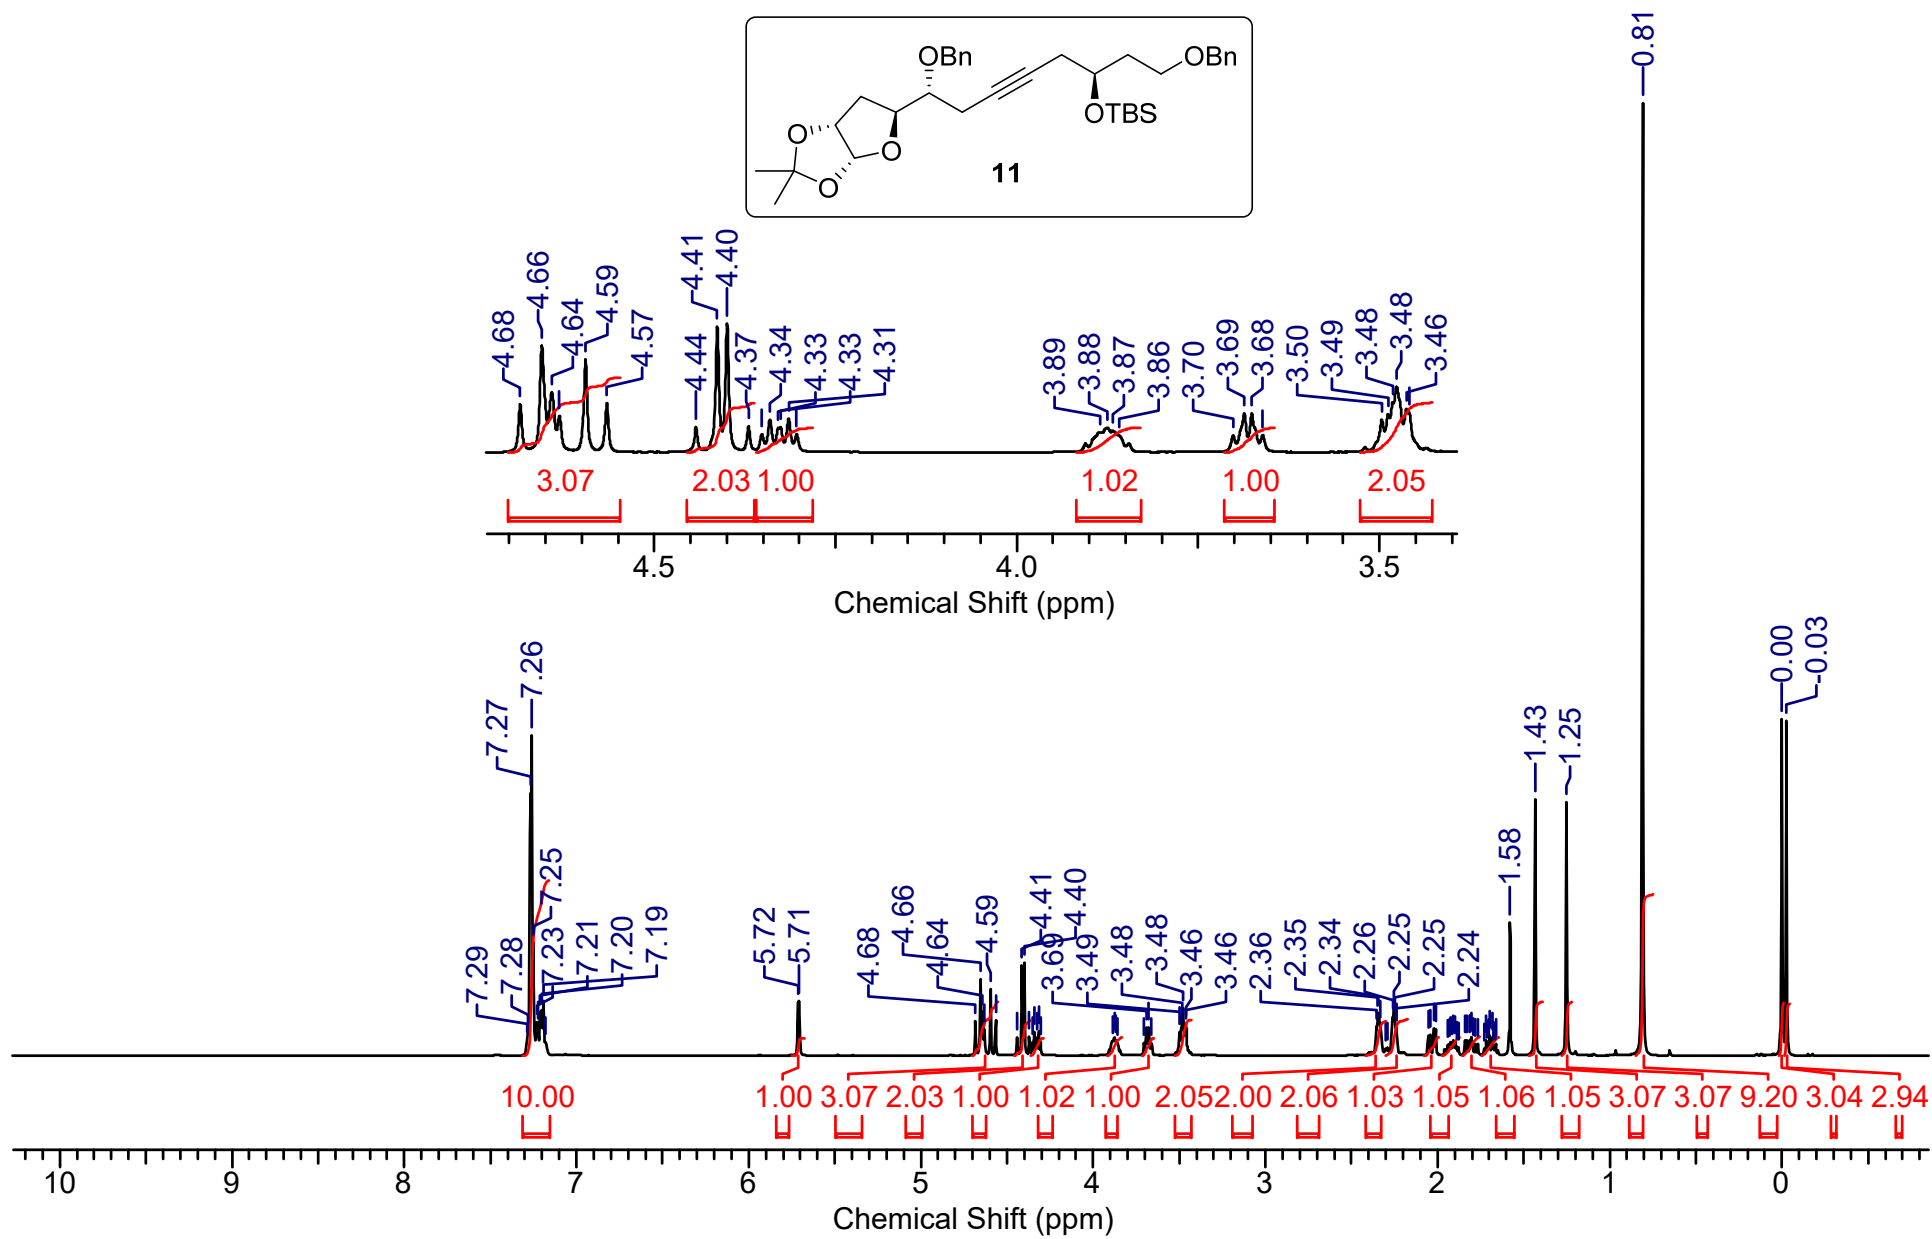

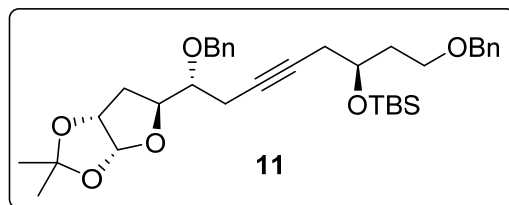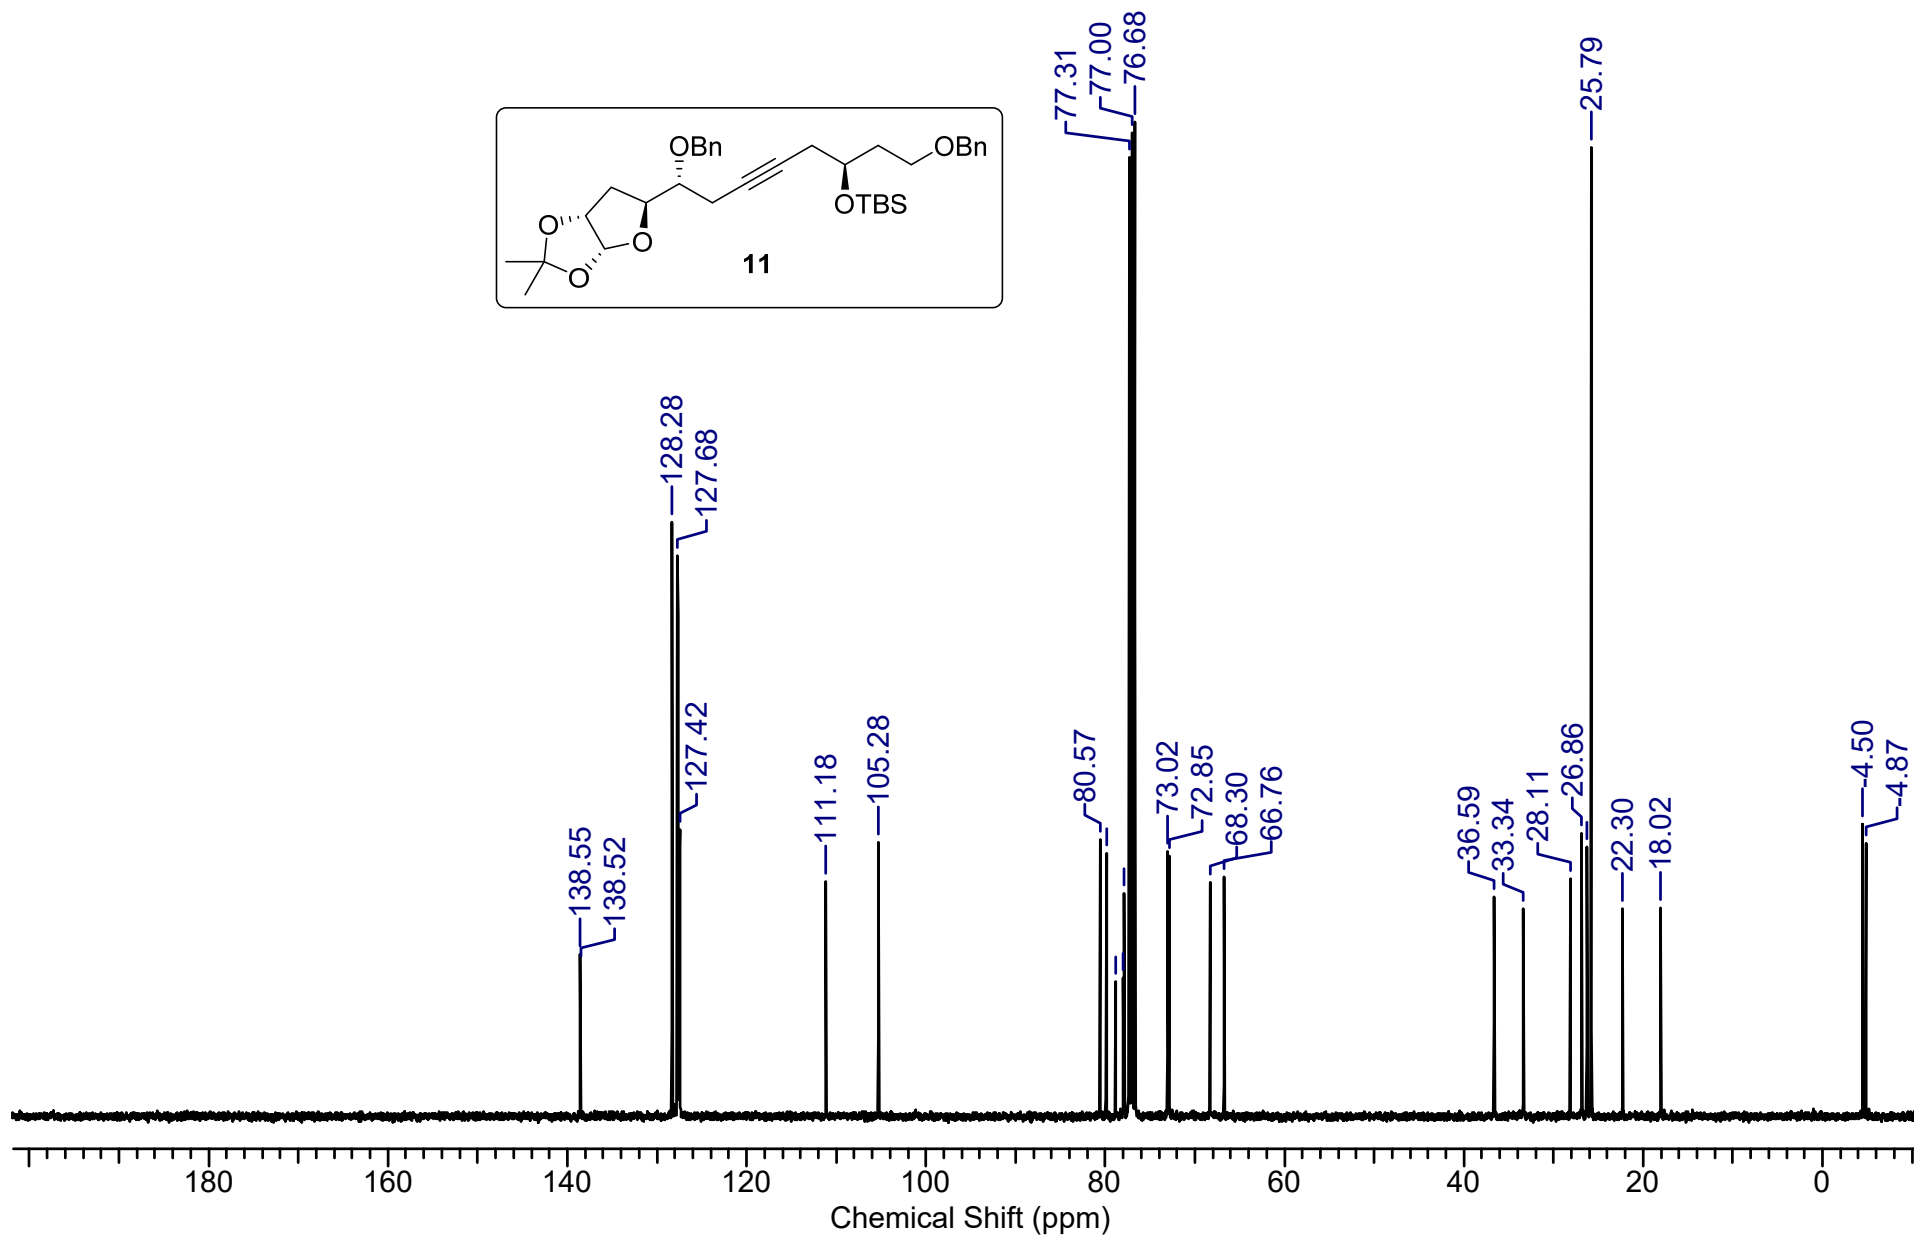



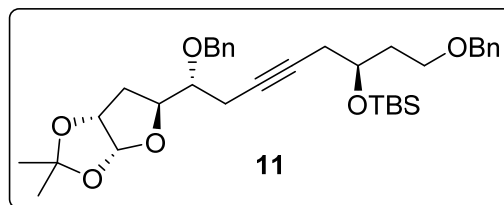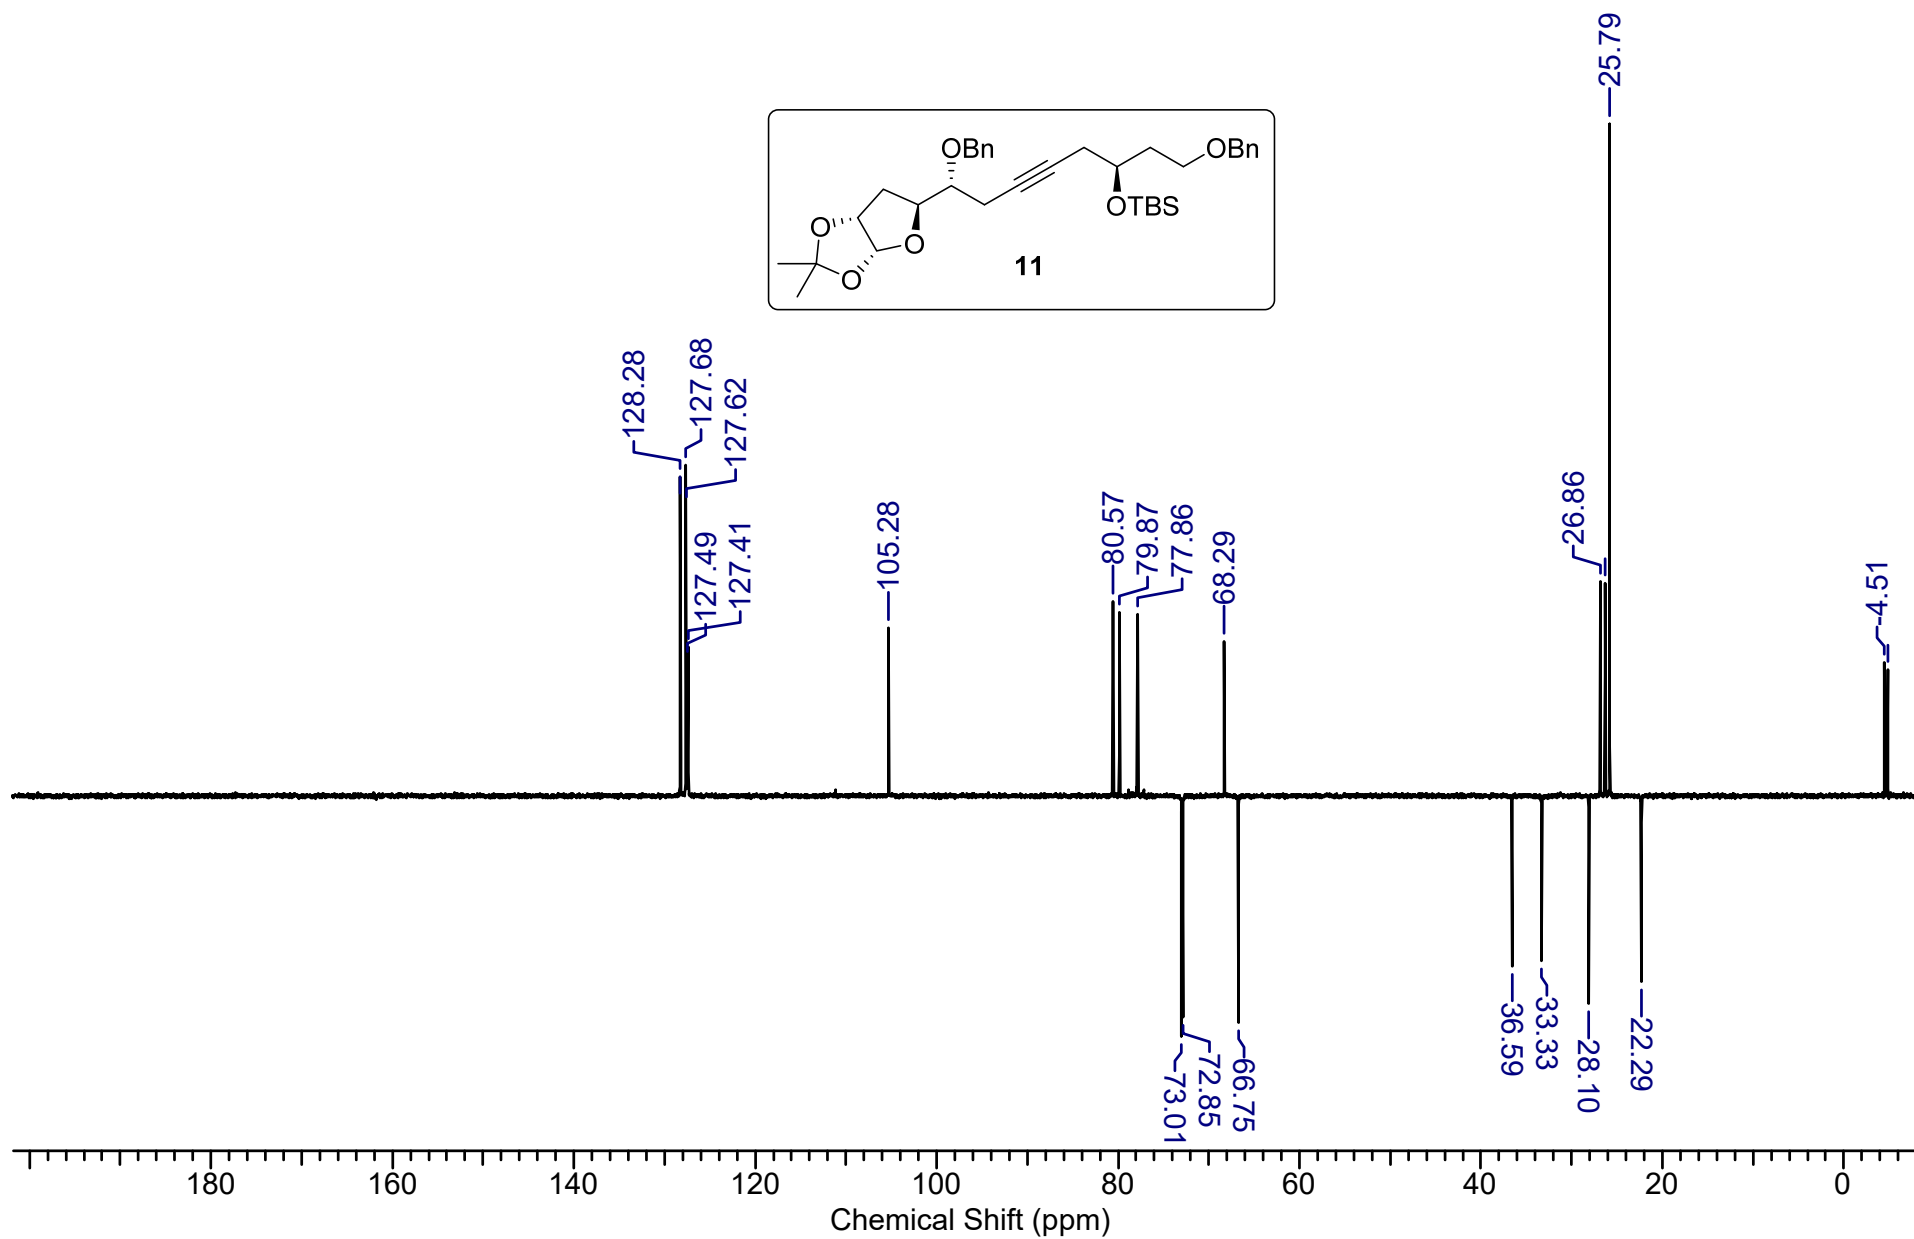

MS-7\_210108154312 #975 RT: 5.89 AV: 1 NL: 2.00E5  
T: FTMS + p ESI Full ms [100.0000-1500.0000]

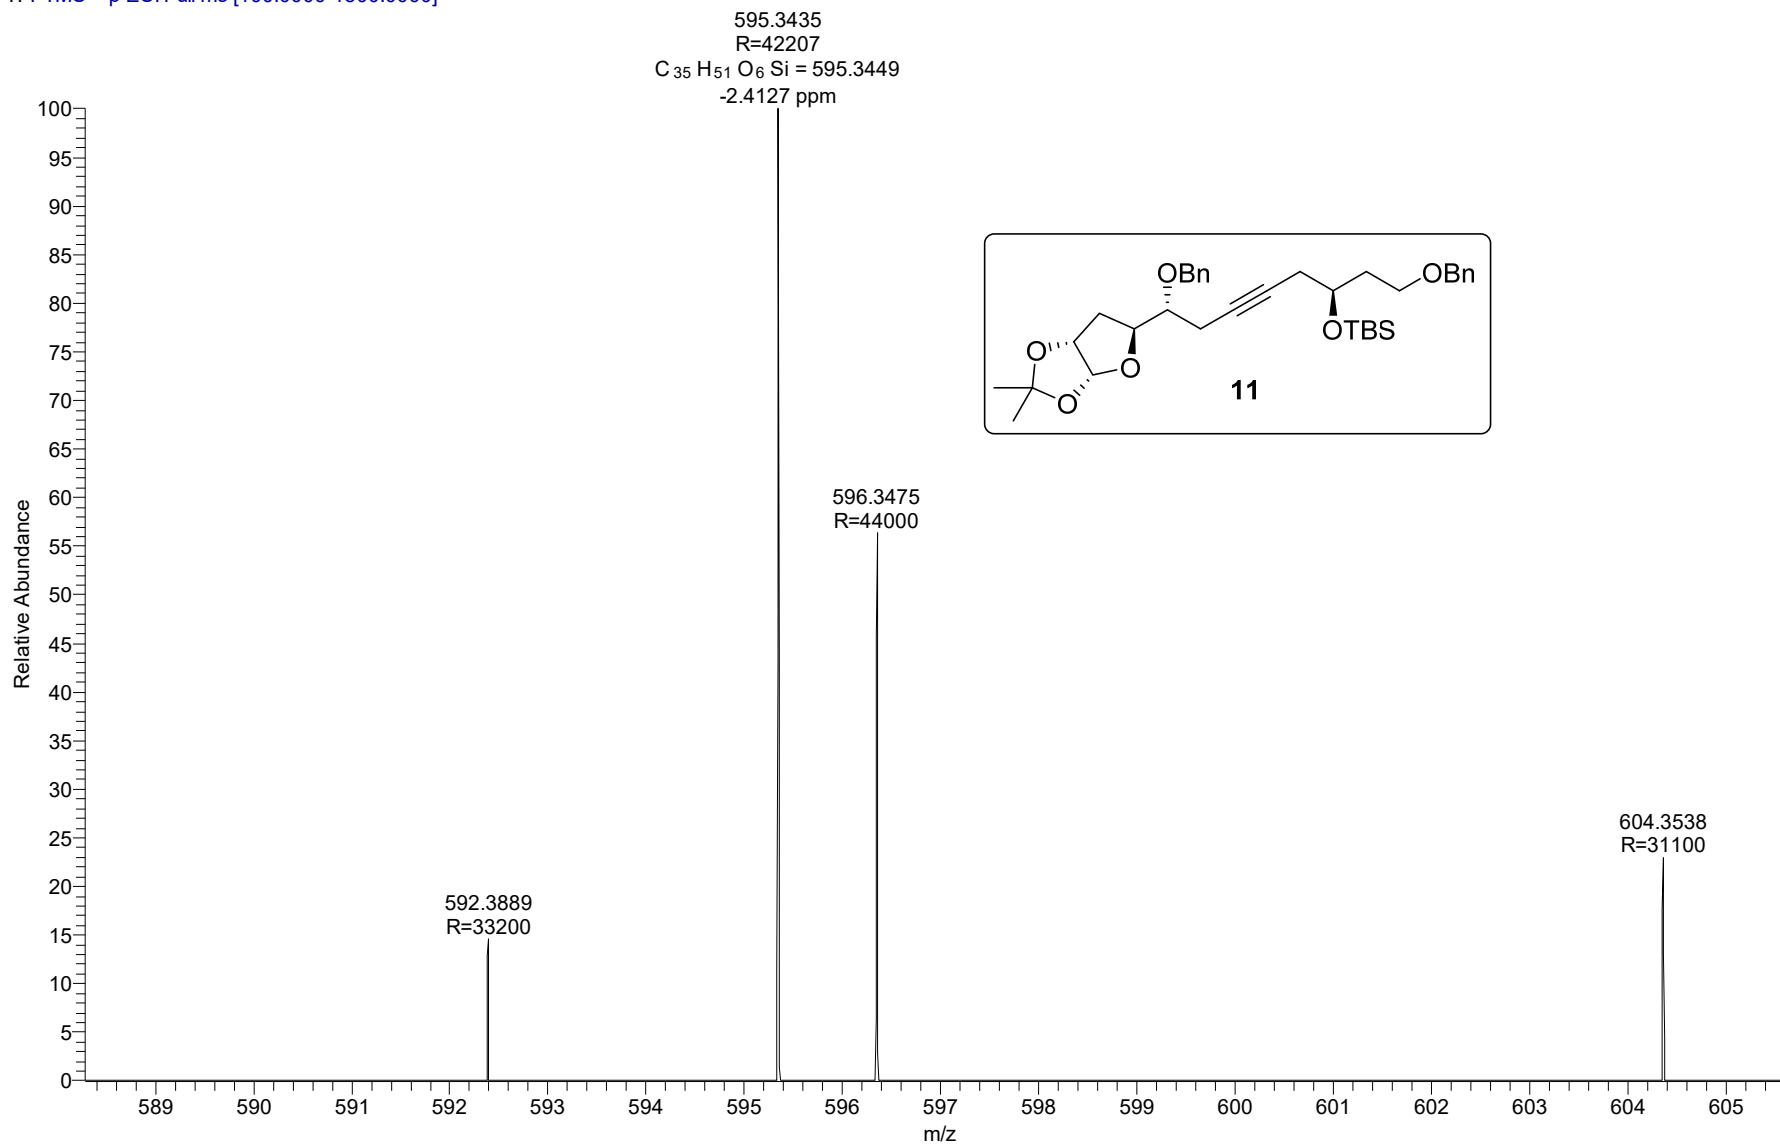

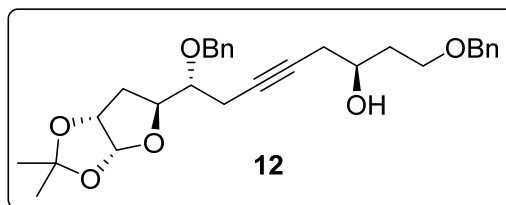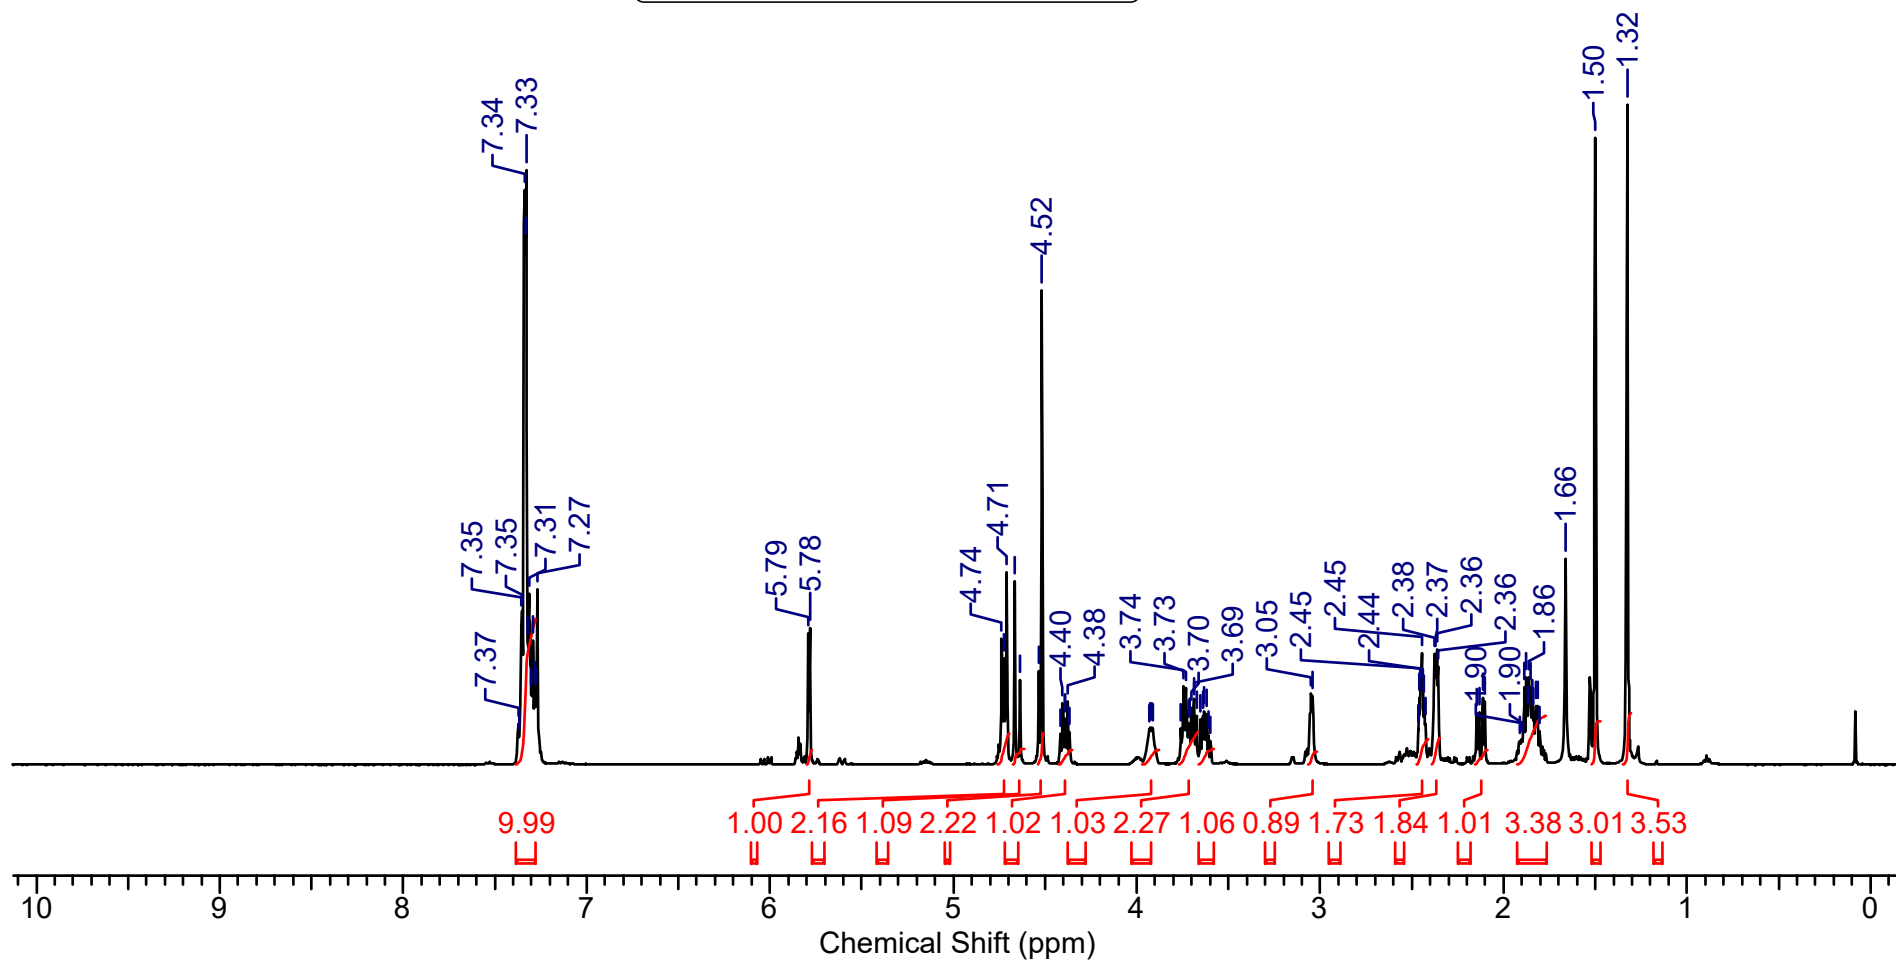

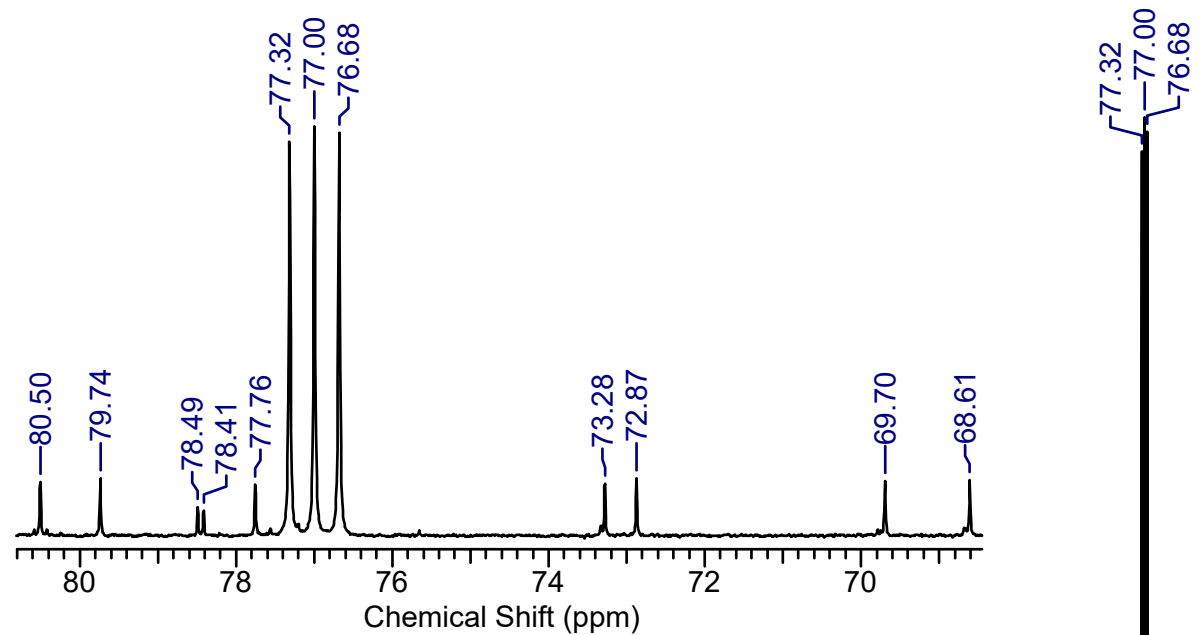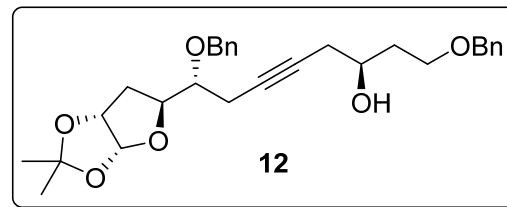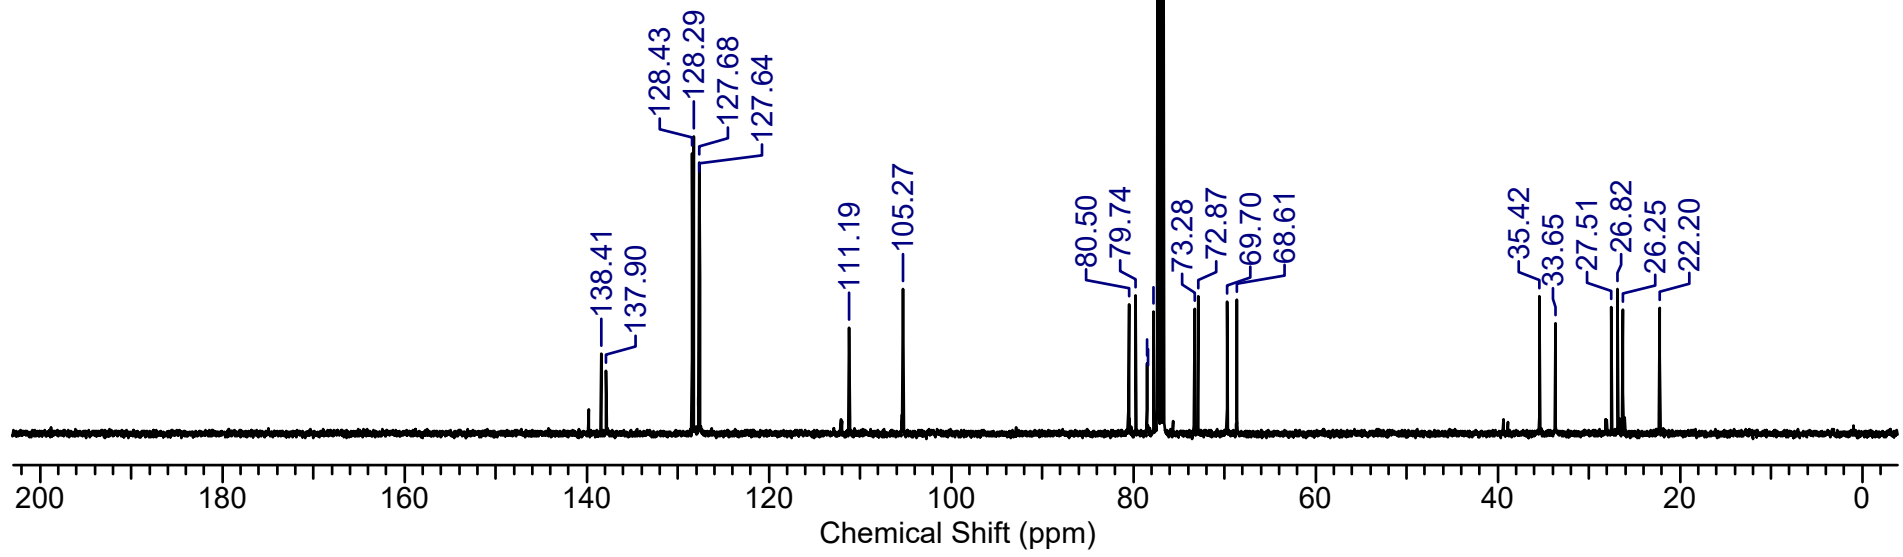

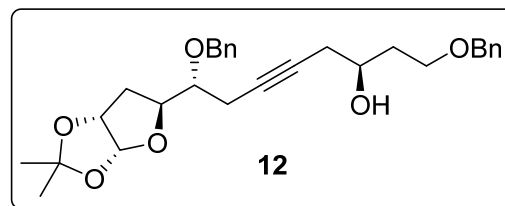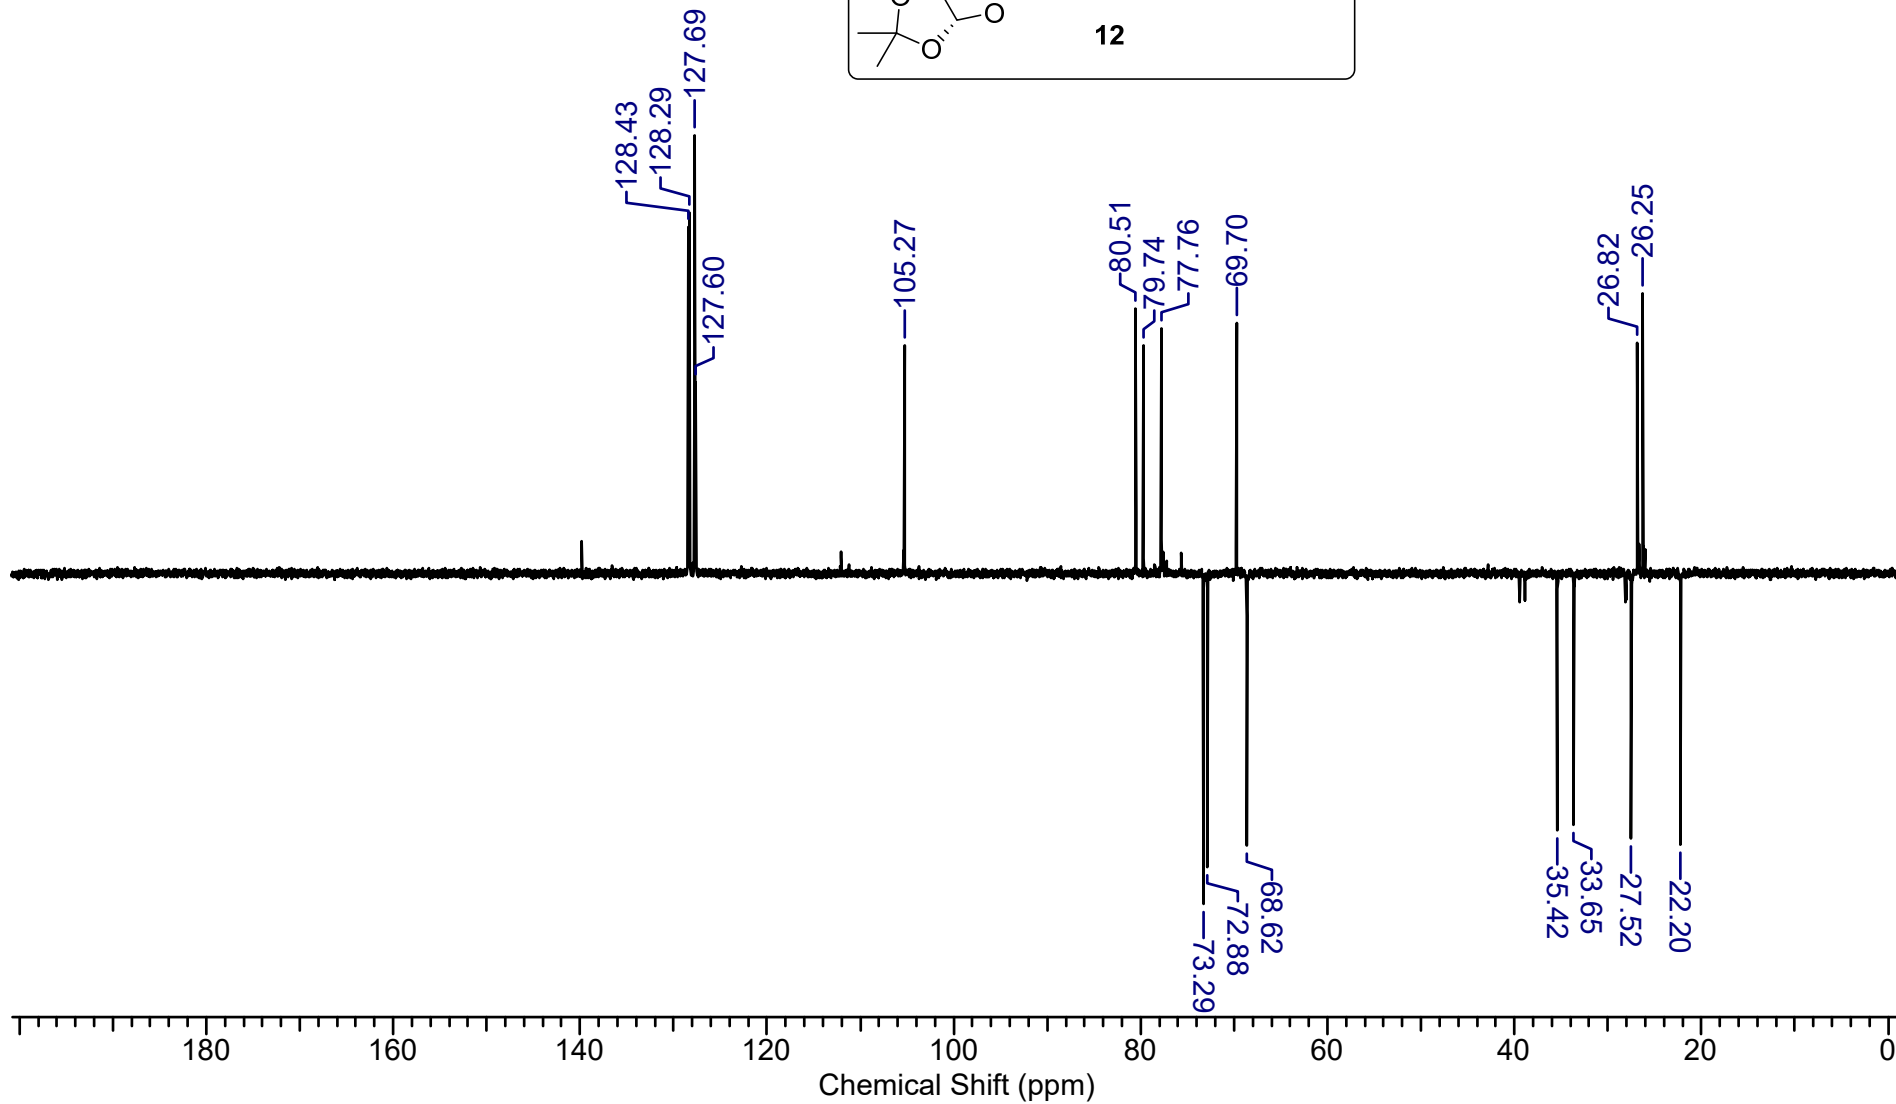

MSH-308 #348 RT: 1.91 AV: 1 NL: 1.00E7  
T: FTMS + p ESI Full ms [100.0000-1500.0000]

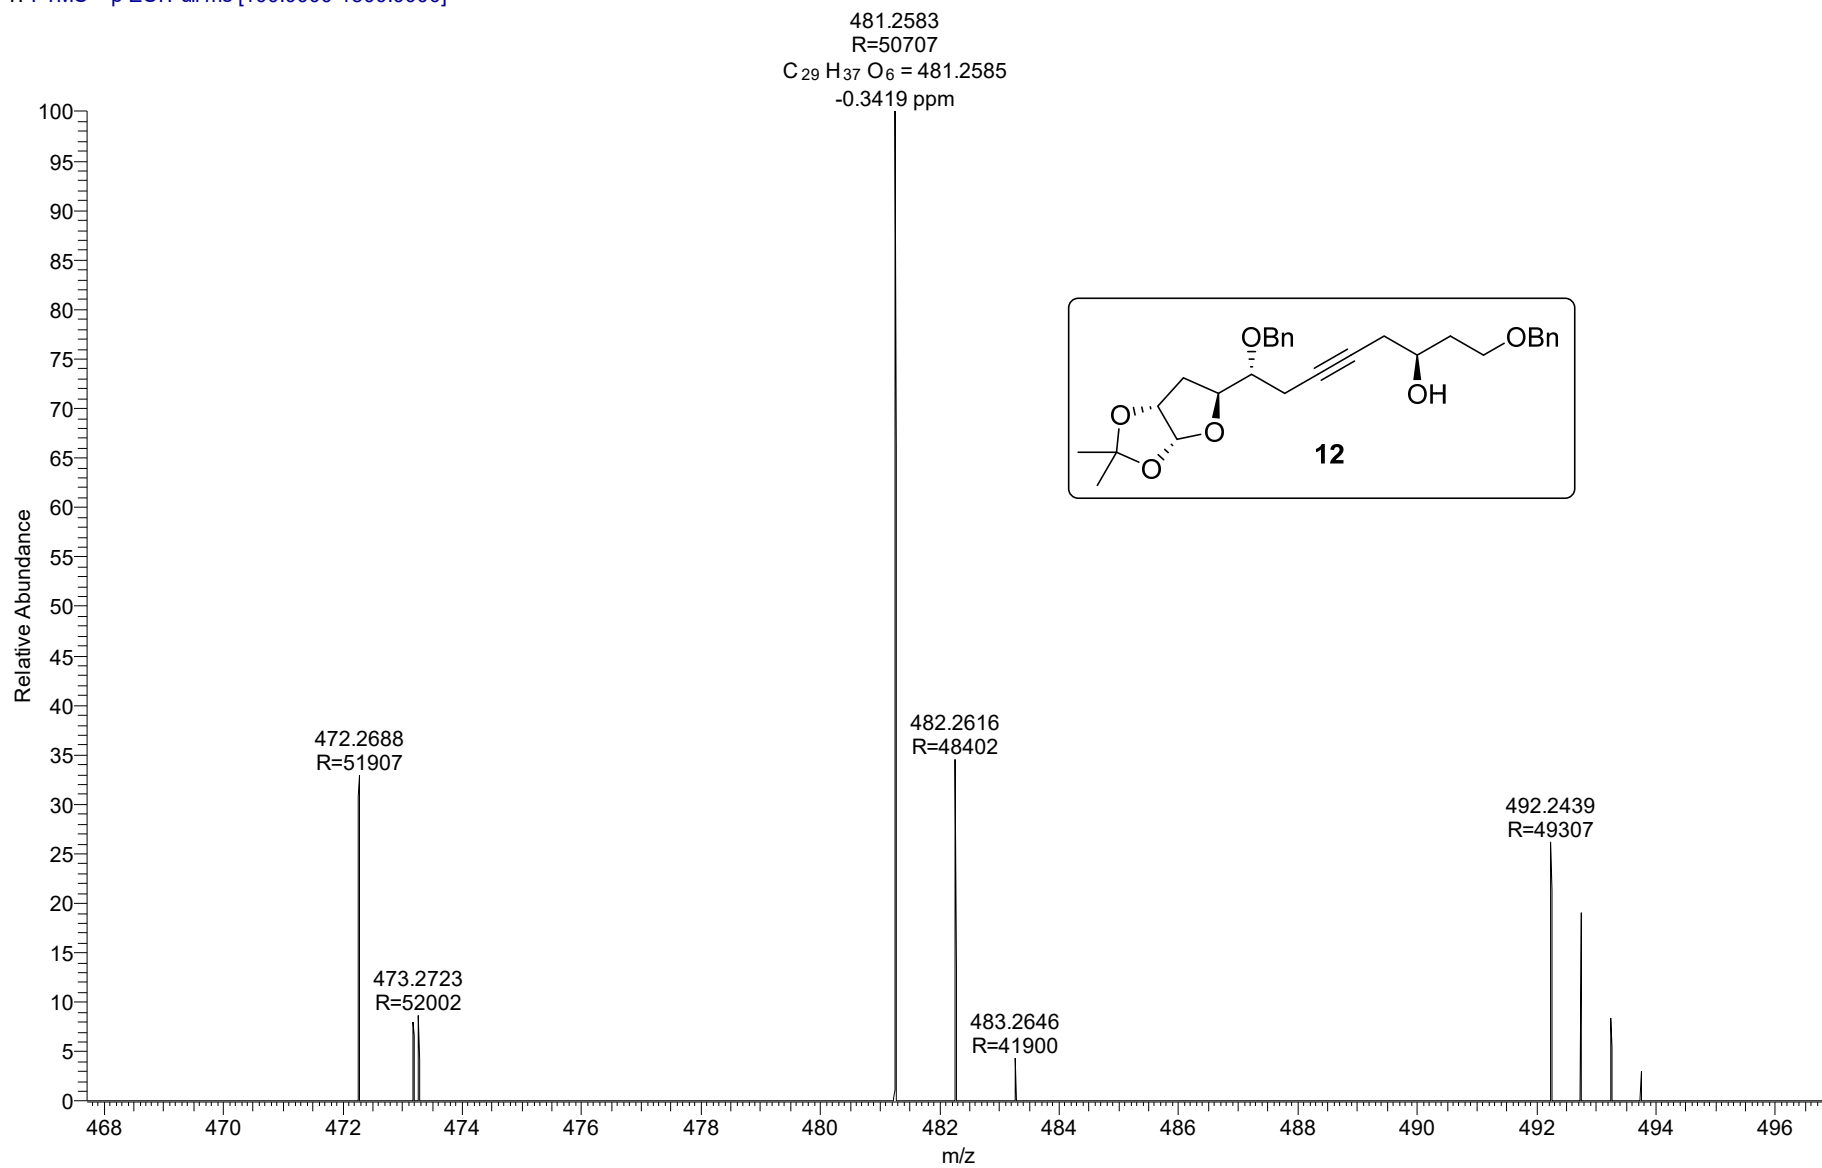

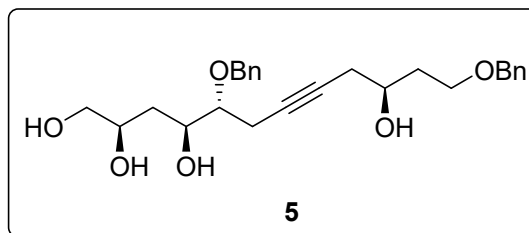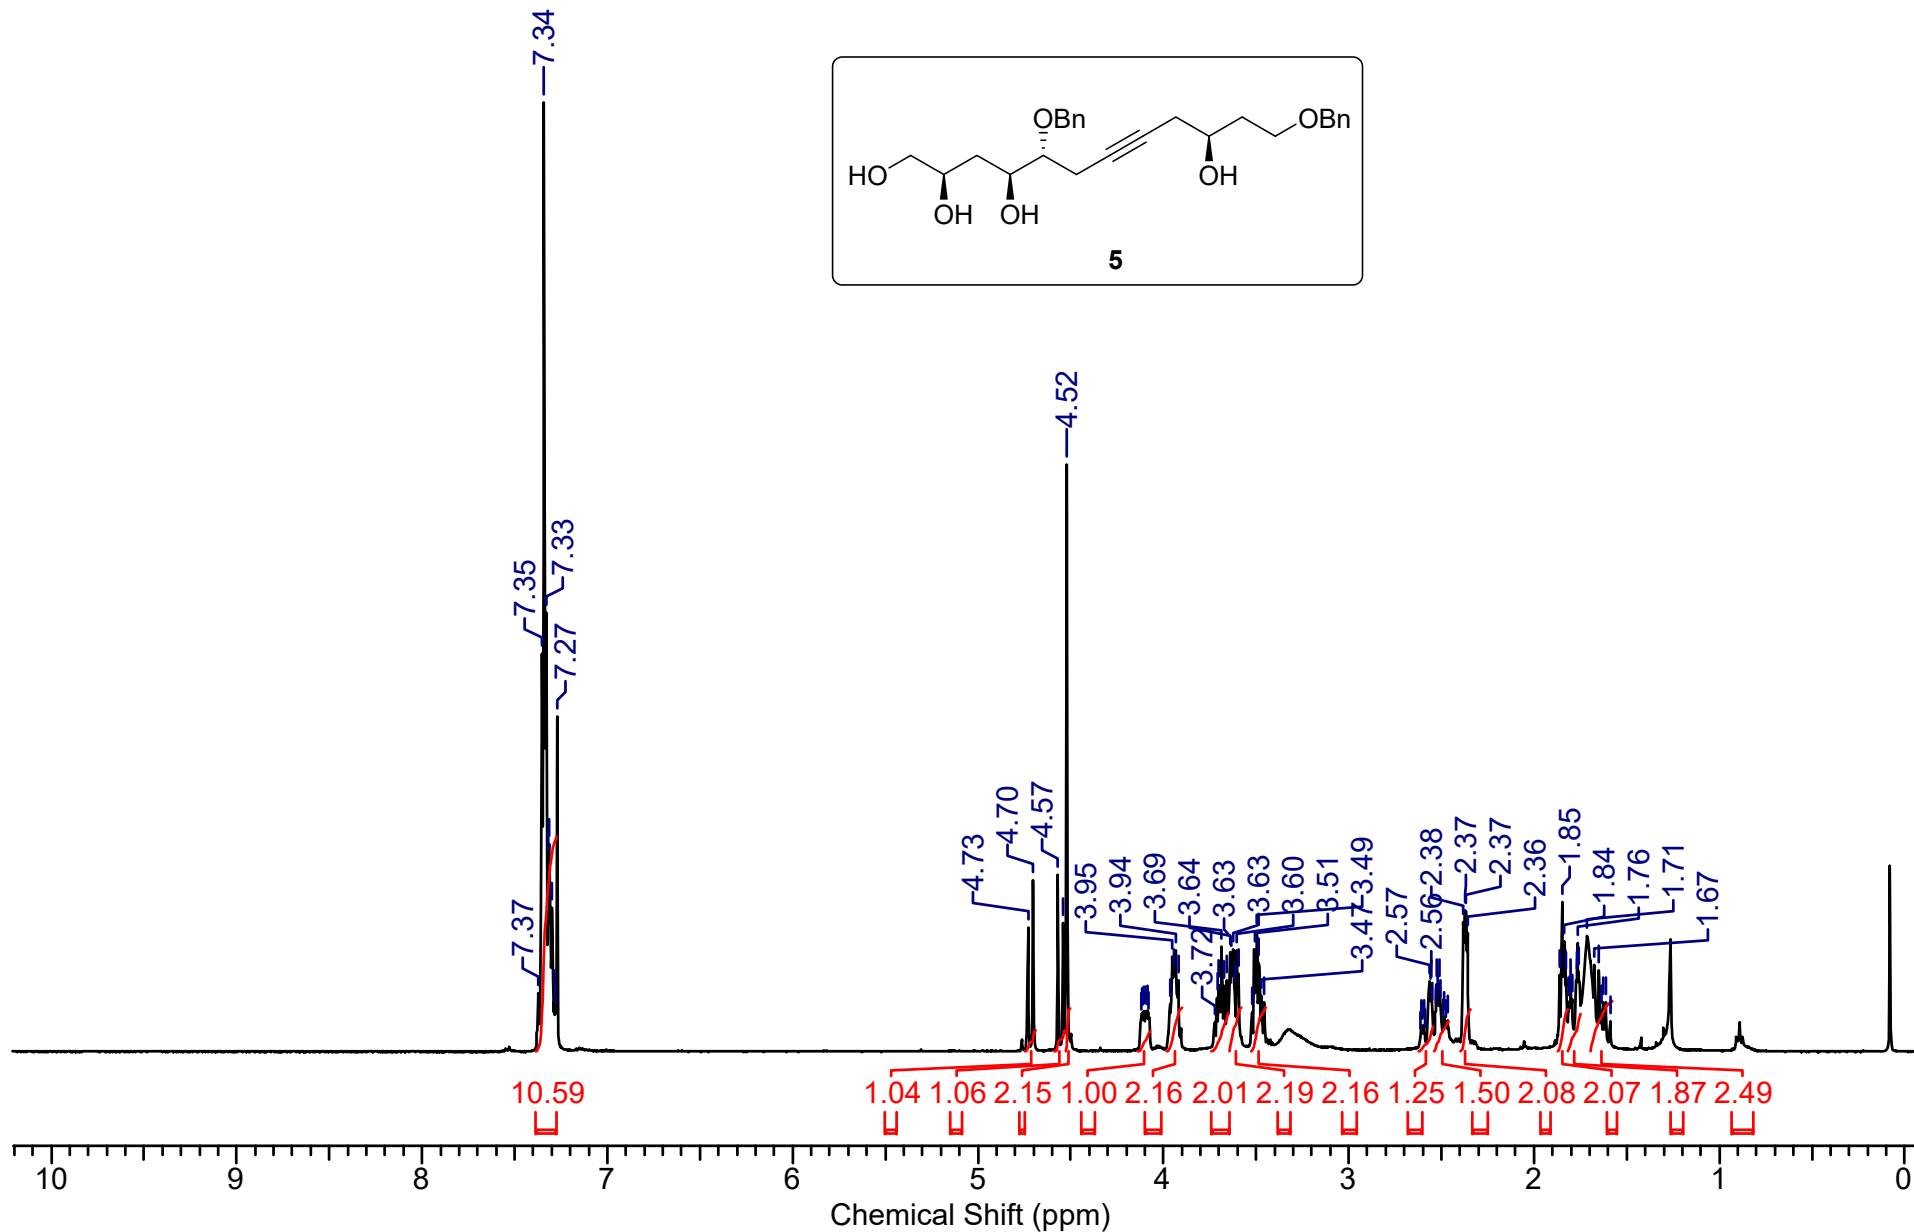

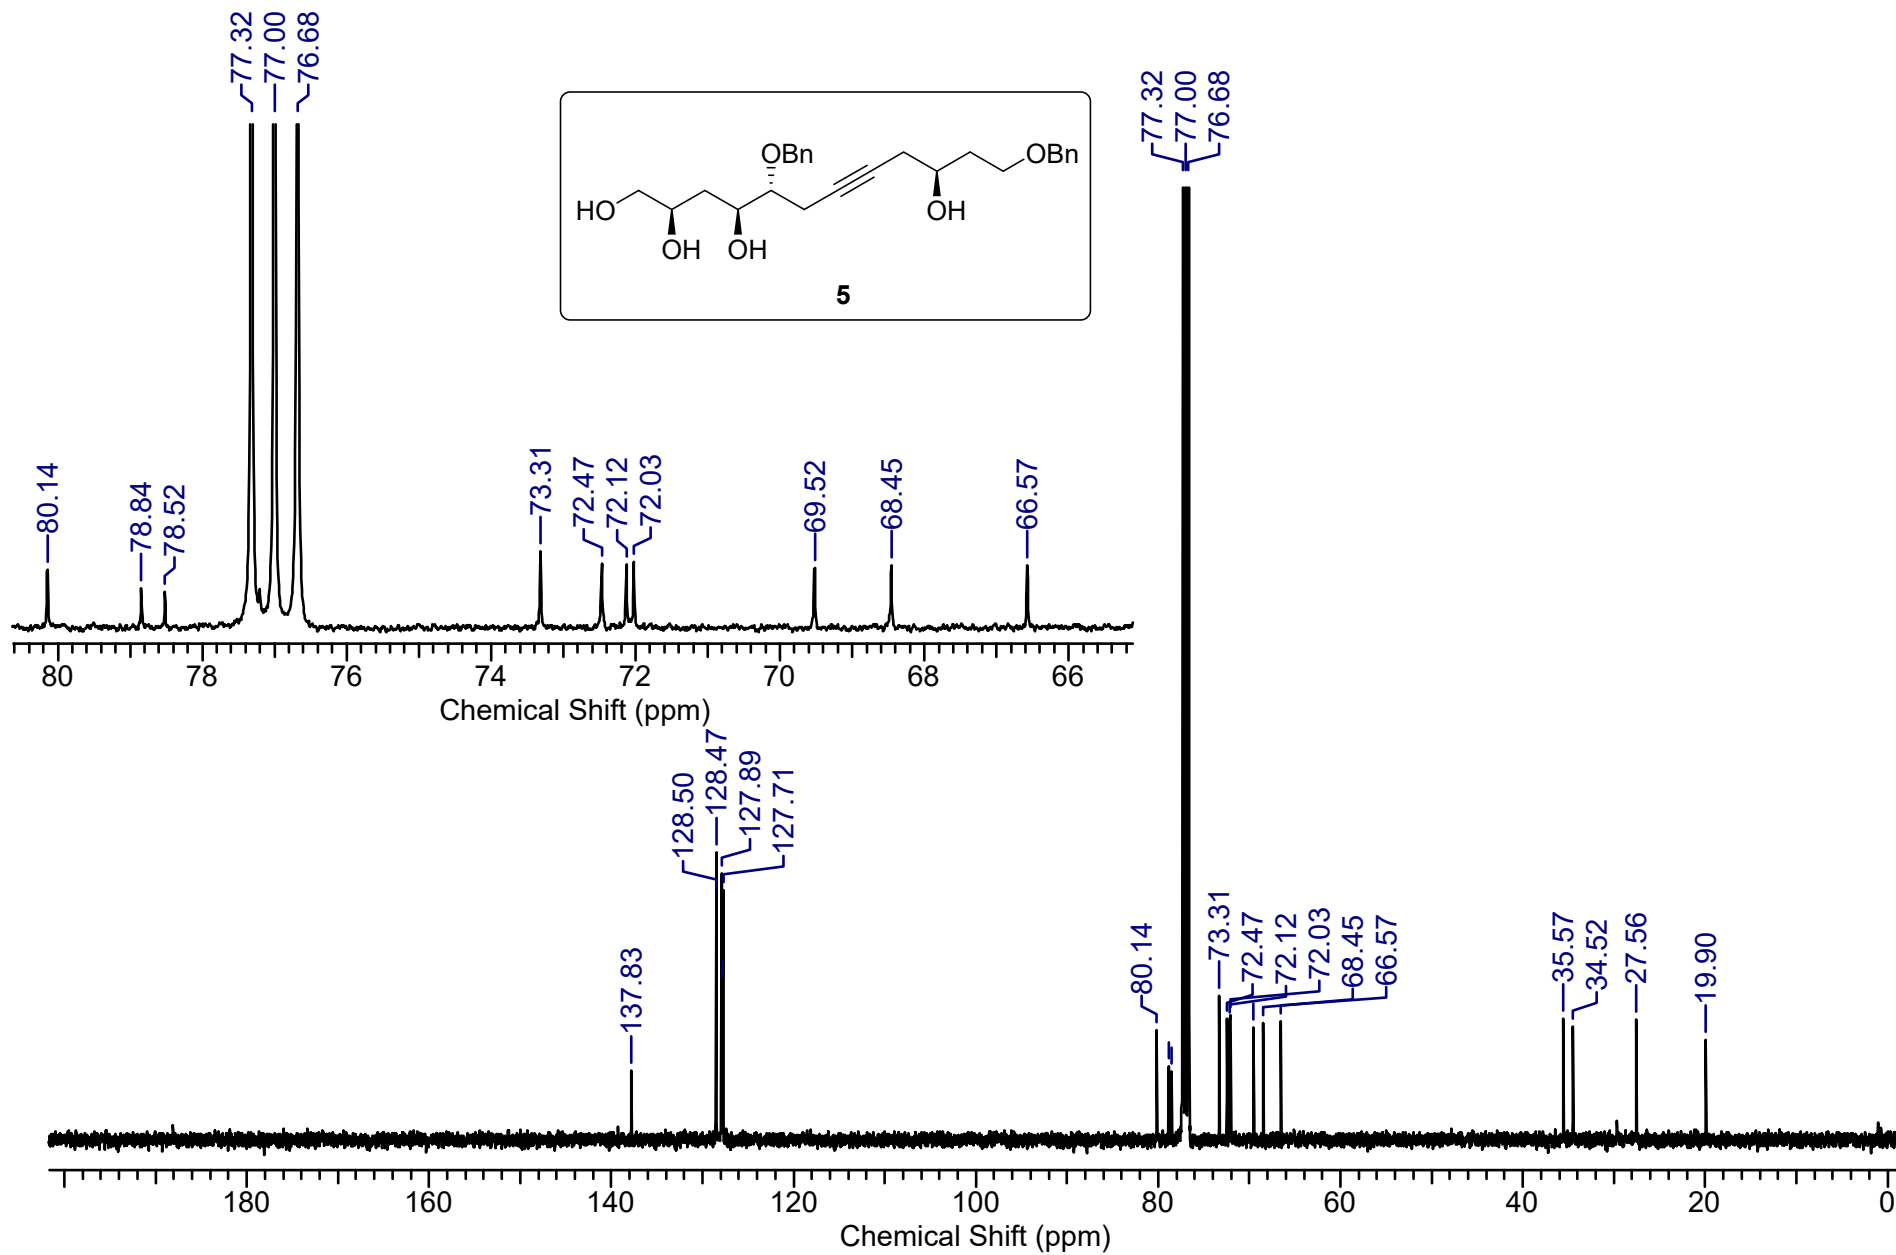



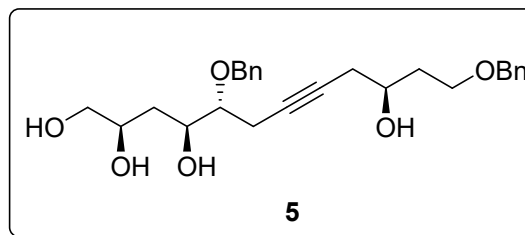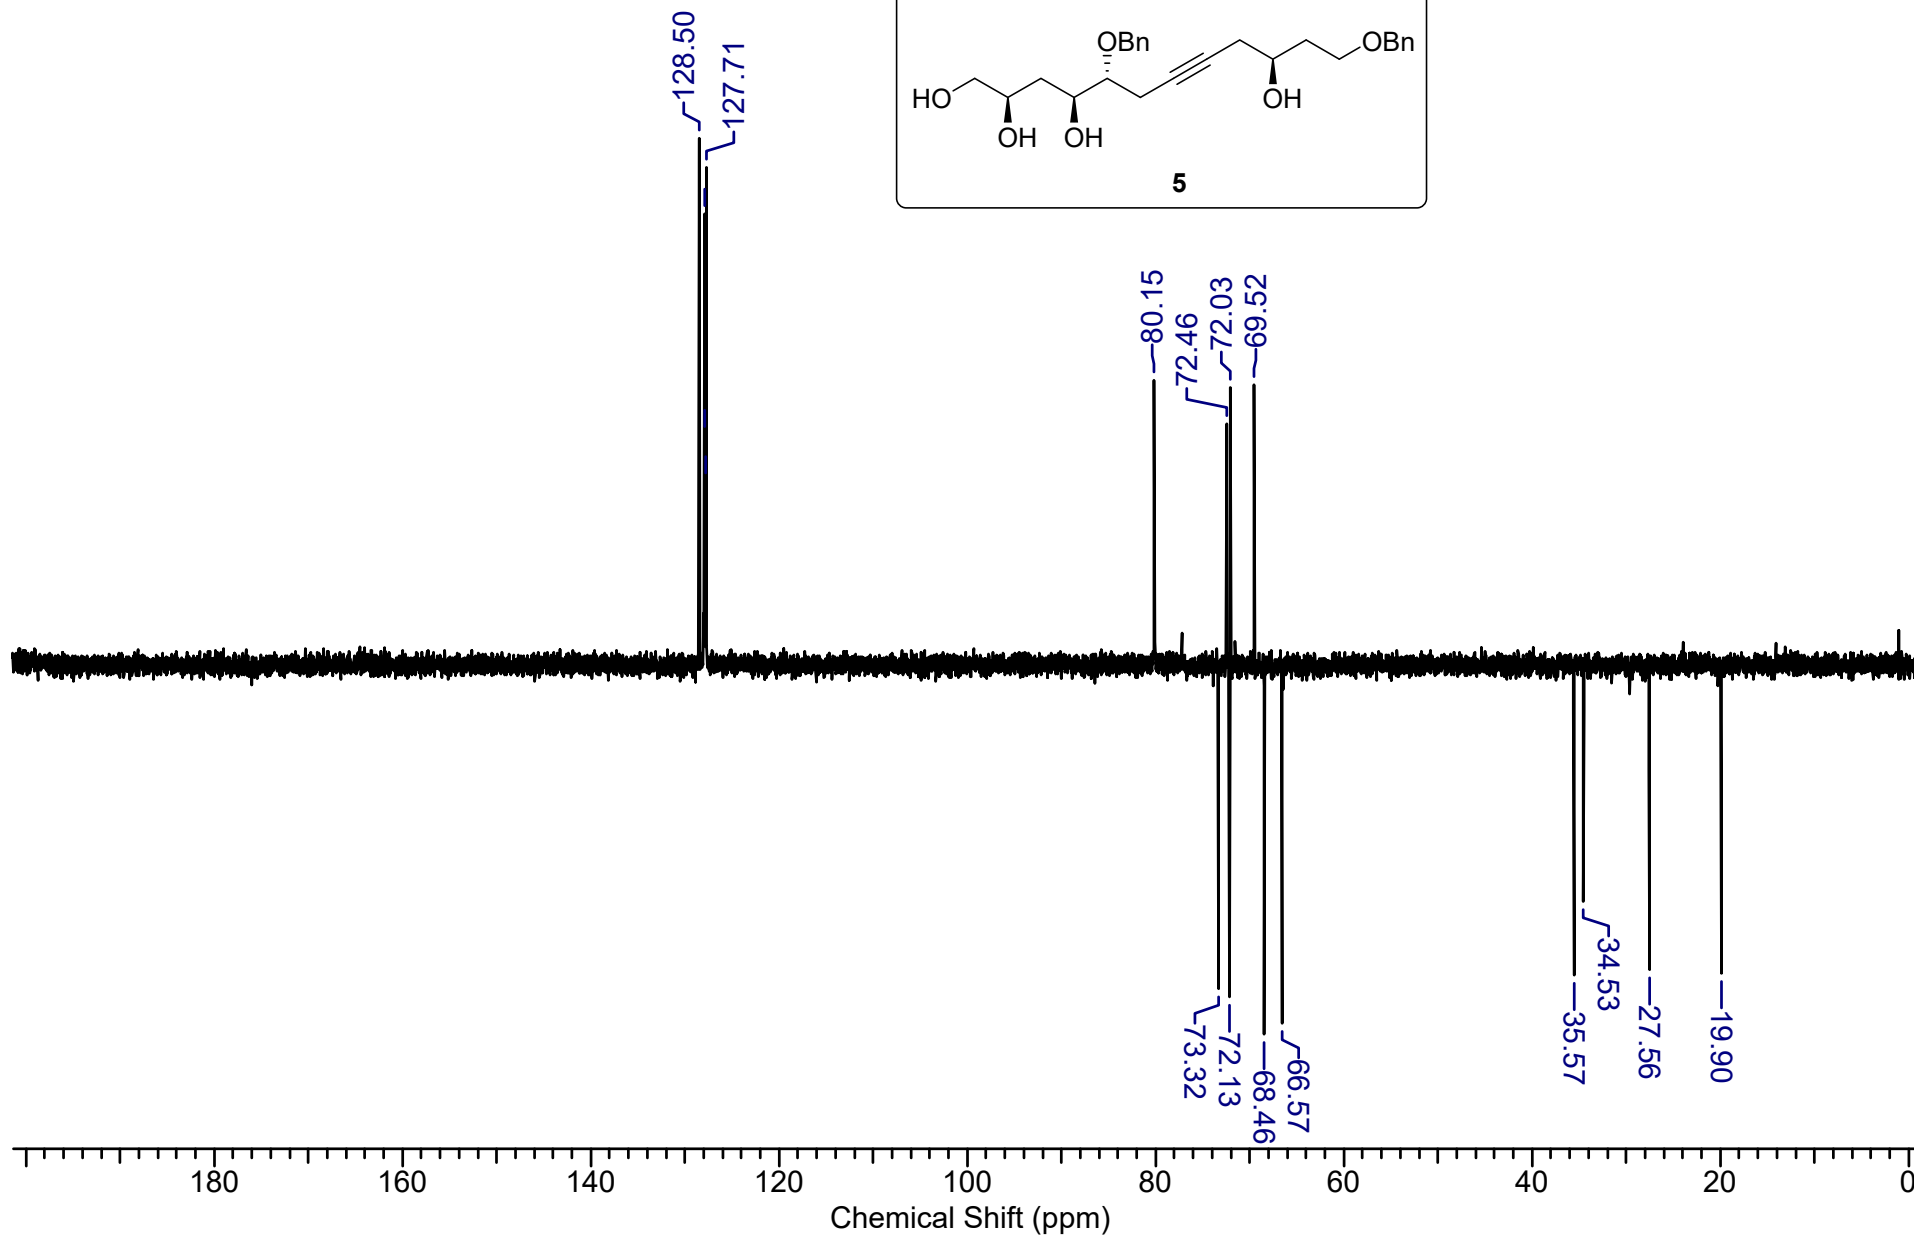

MS-9 #413 RT: 2.49 AV: 1 NL: 3.61E8  
T: FTMS + p ESI Full ms [100.0000-1500.0000]

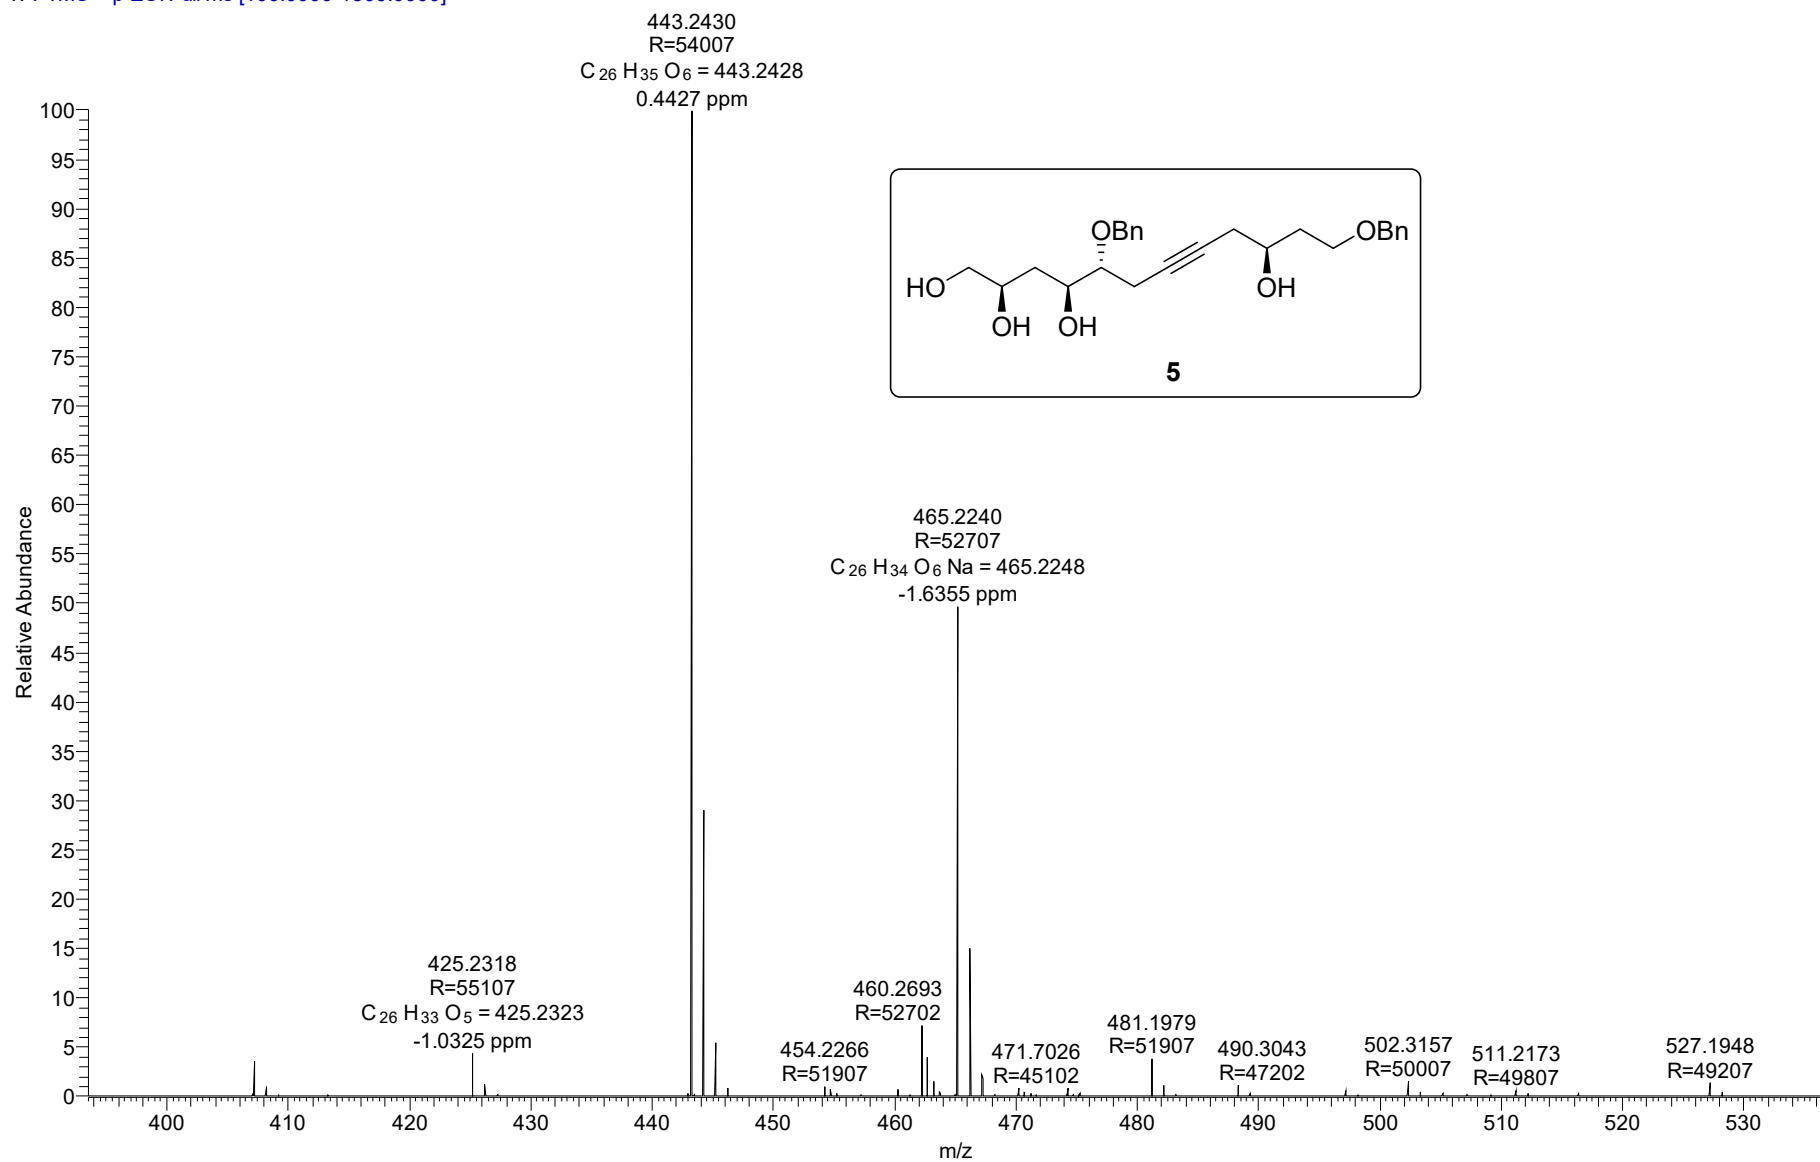

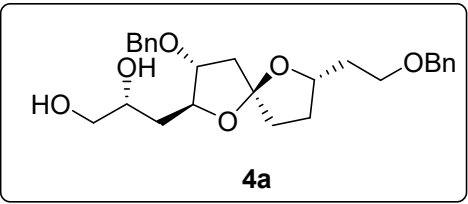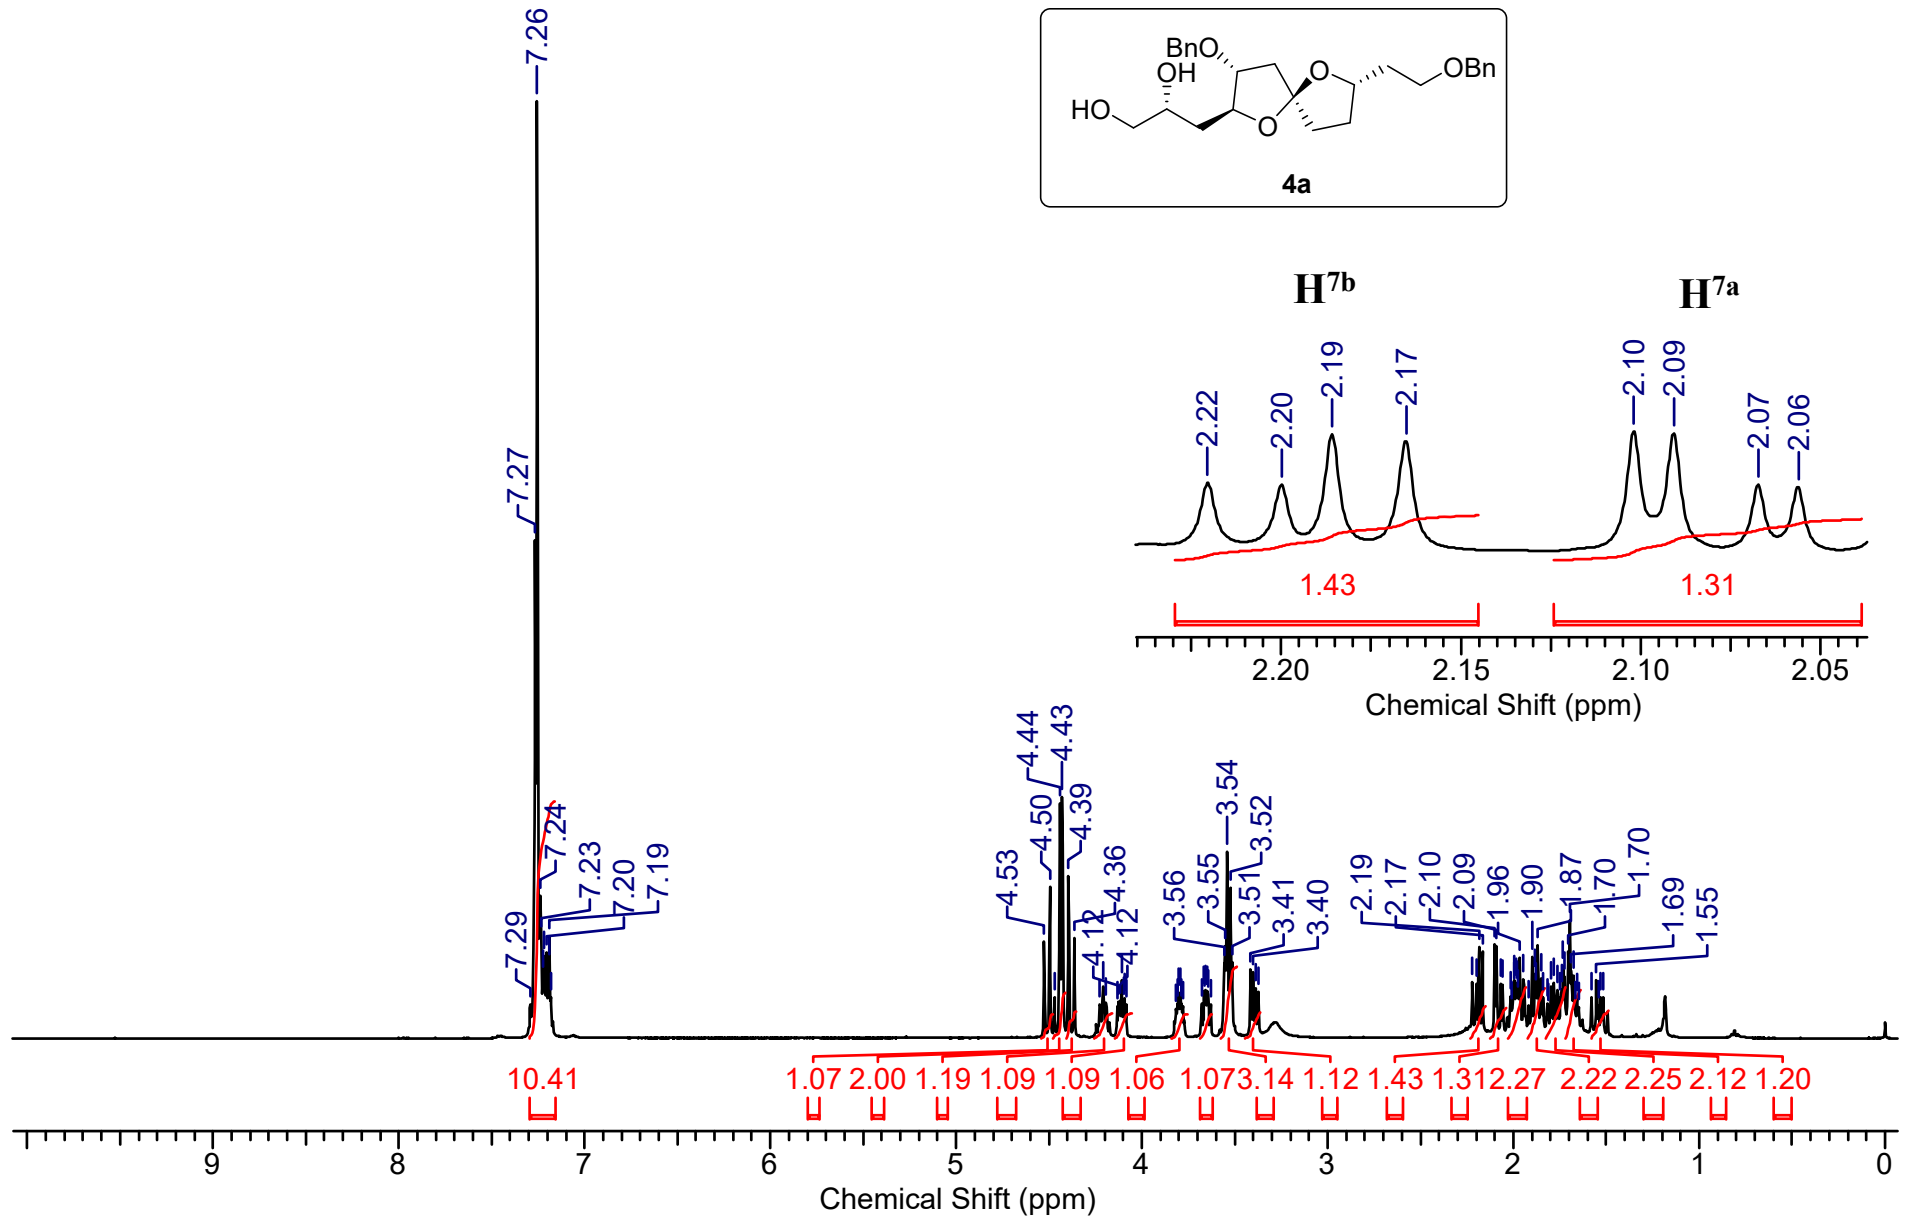

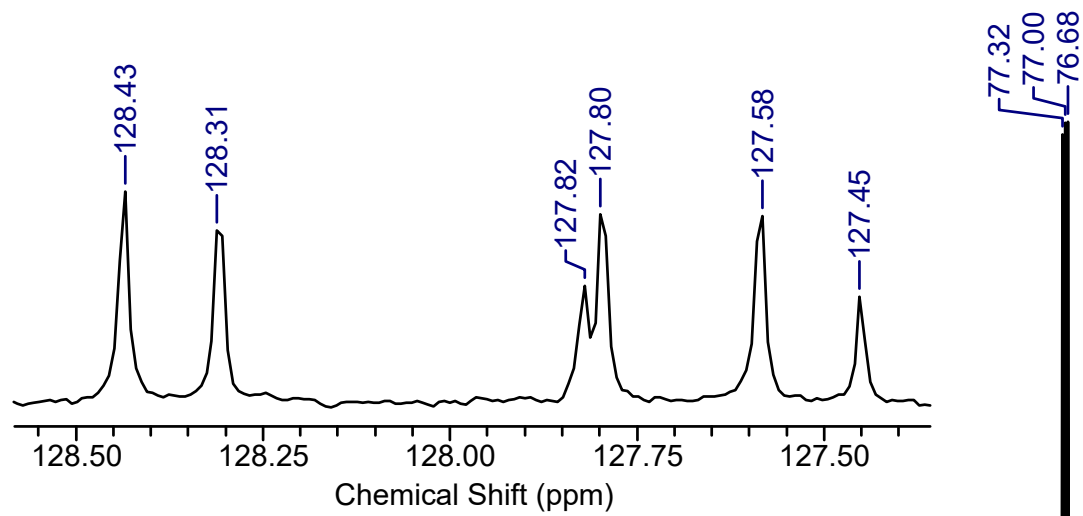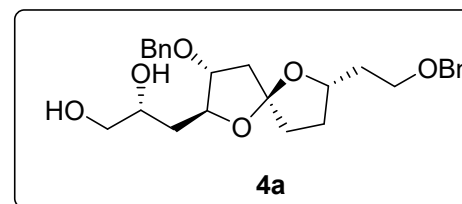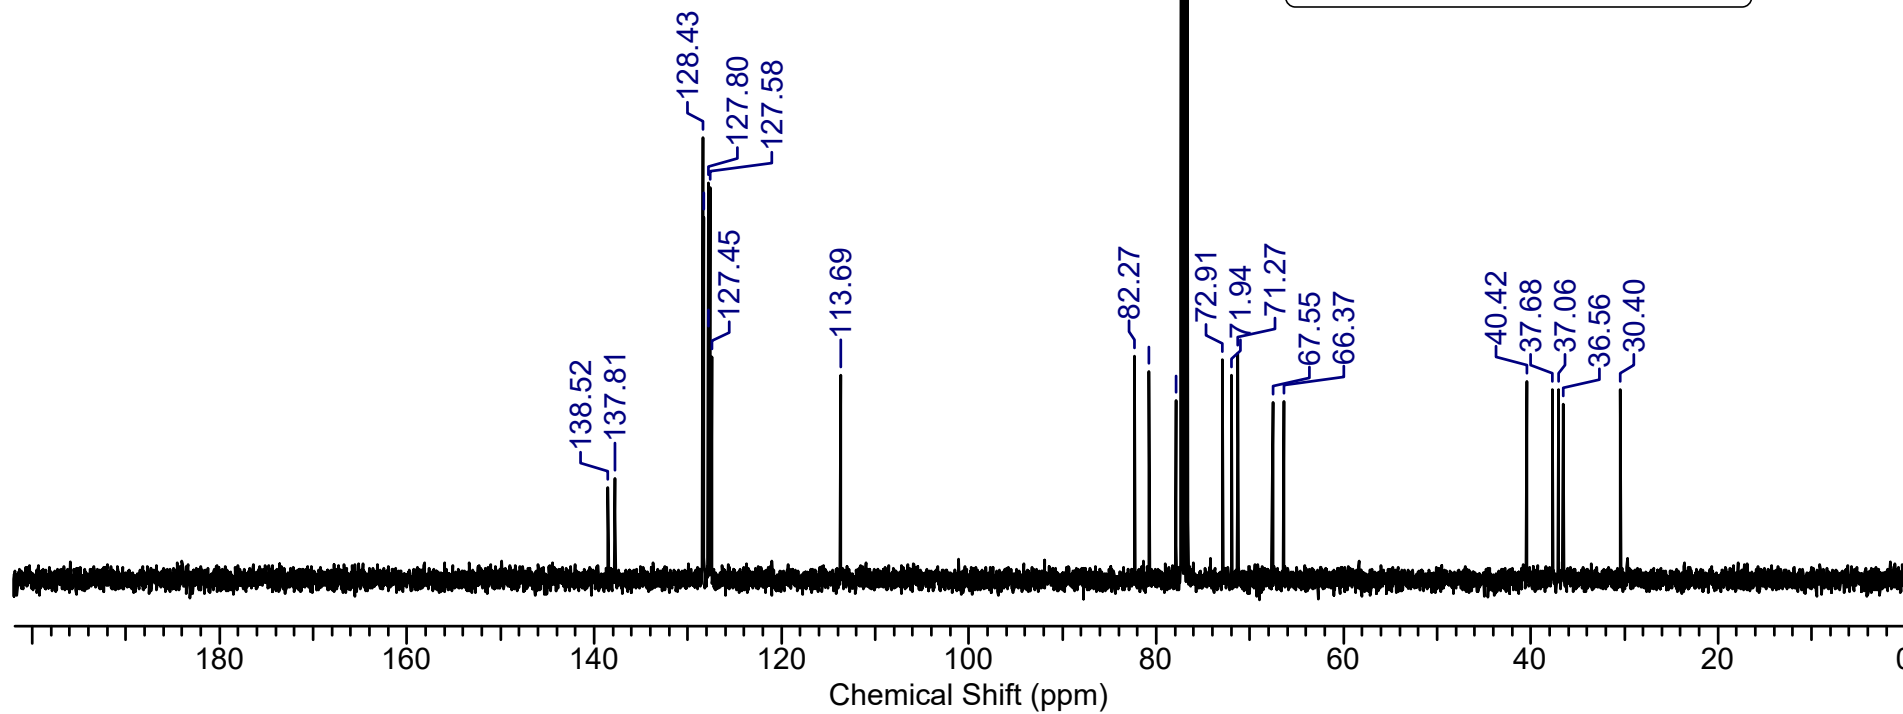

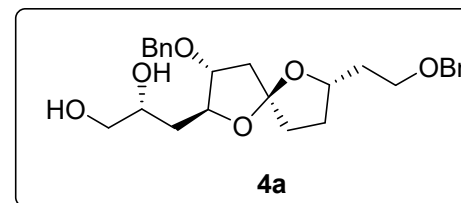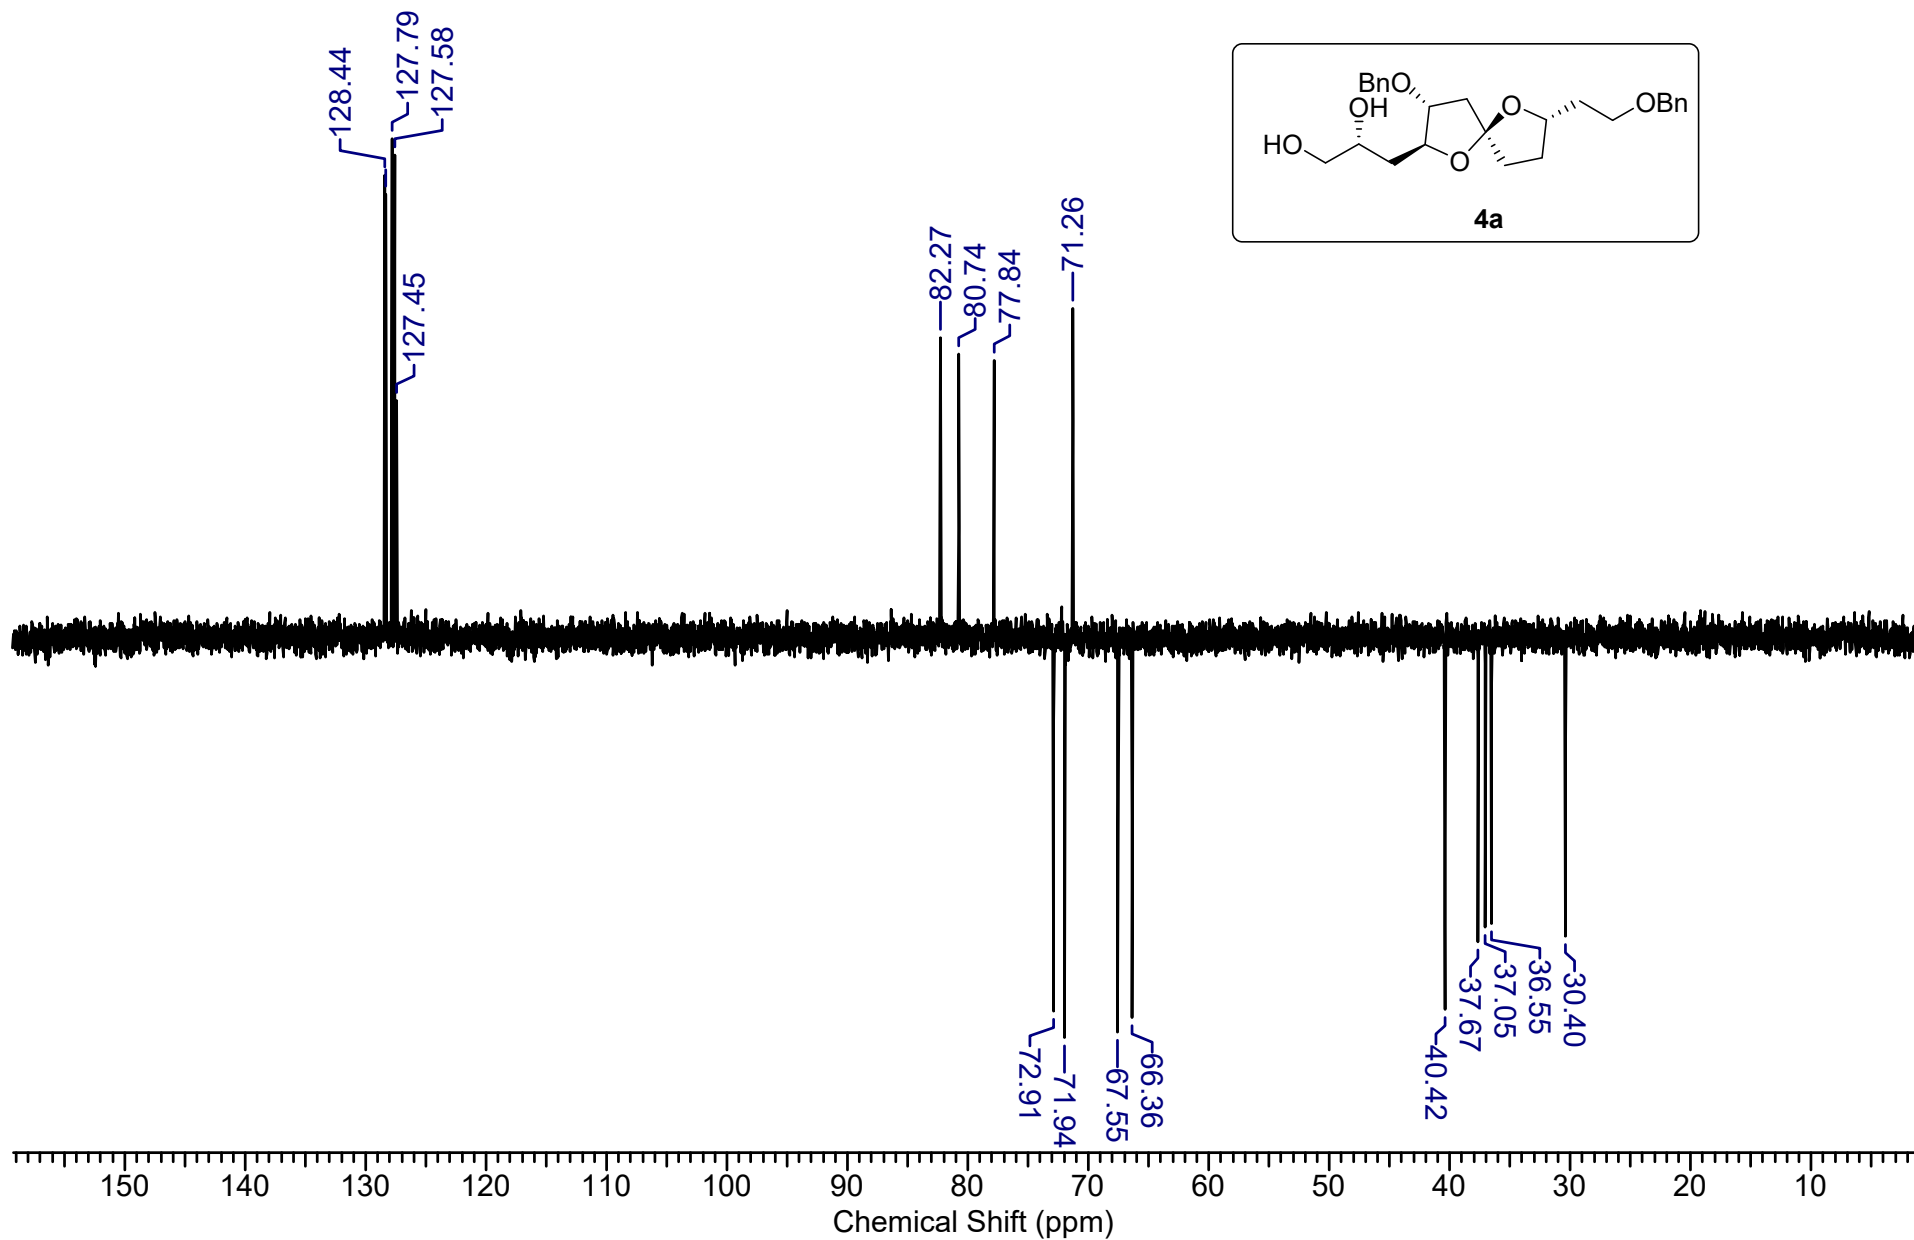

MSH-309-3 #376 RT: 2.06 AV: 1 NL: 1.36E8  
T: FTMS + p ESI Full ms [100.0000-1500.0000]

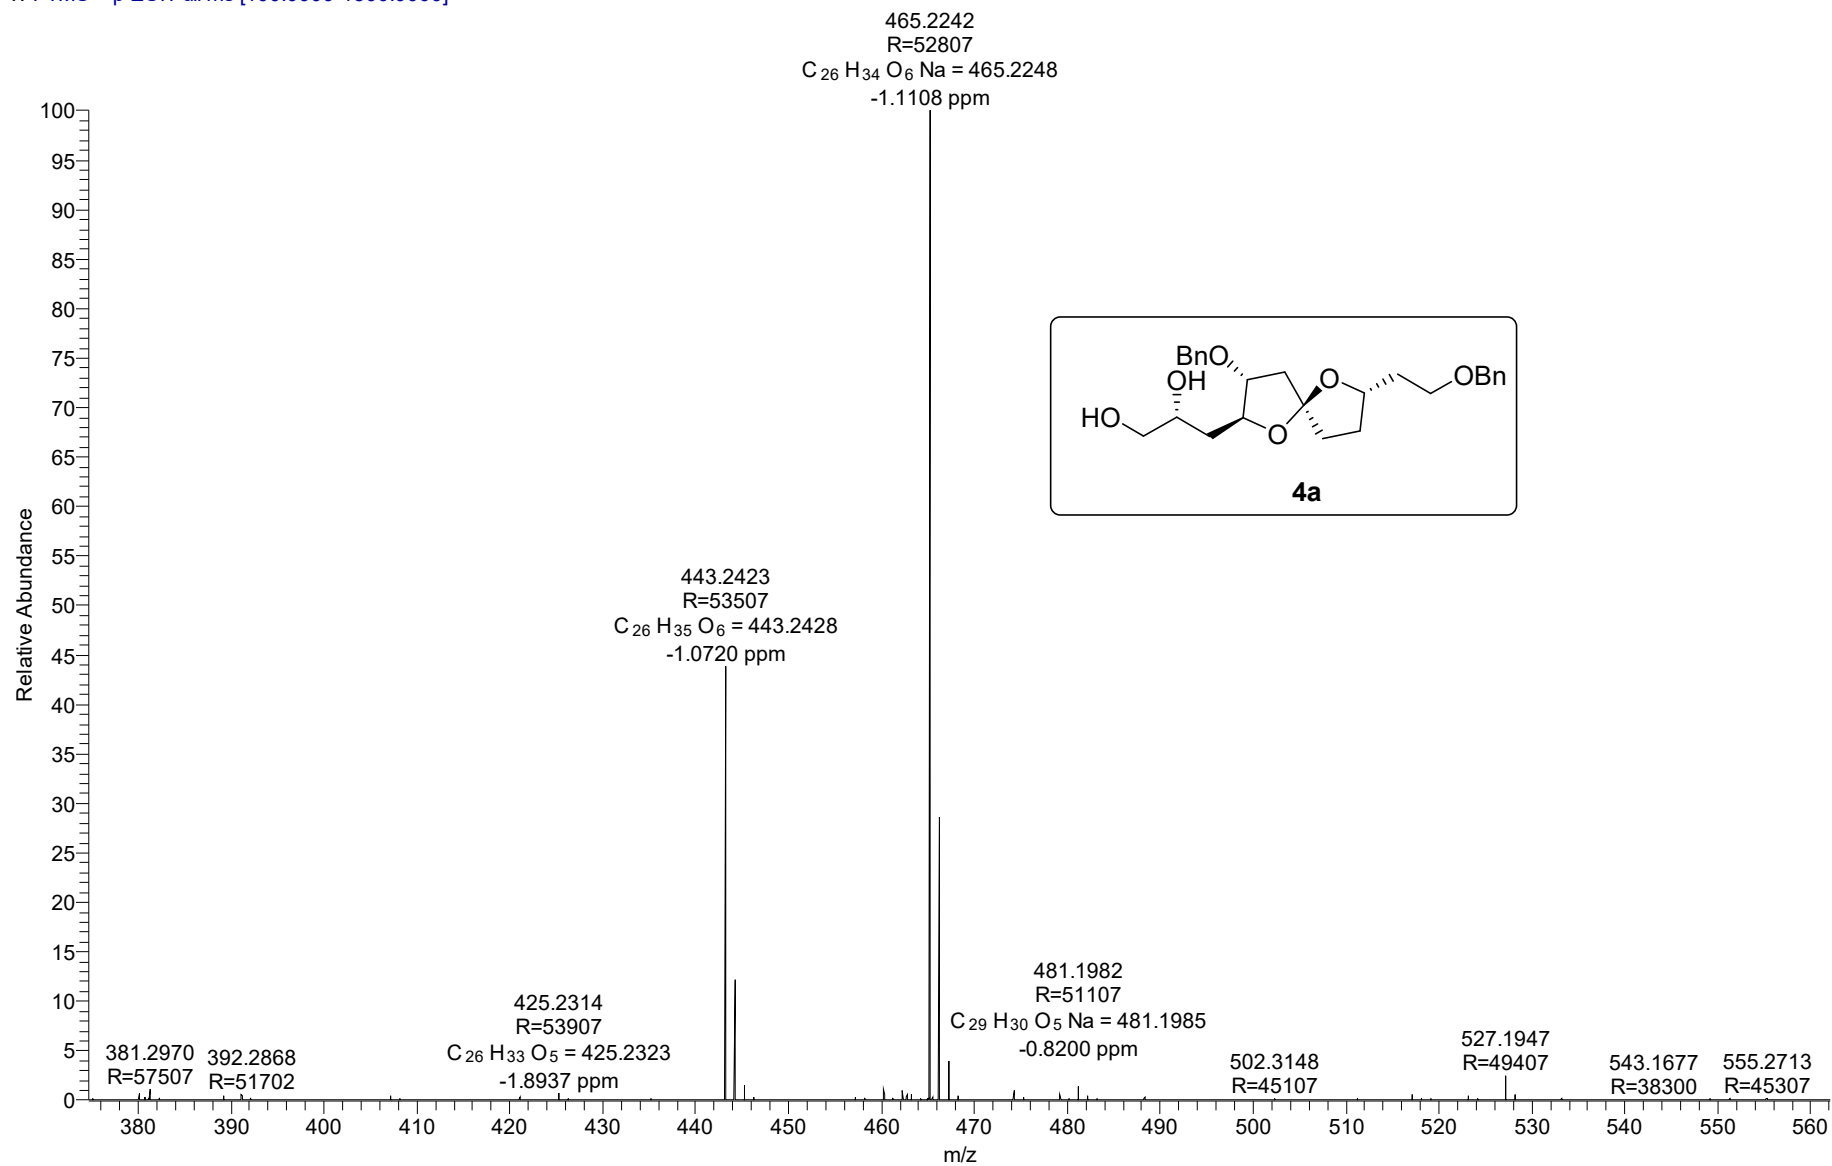

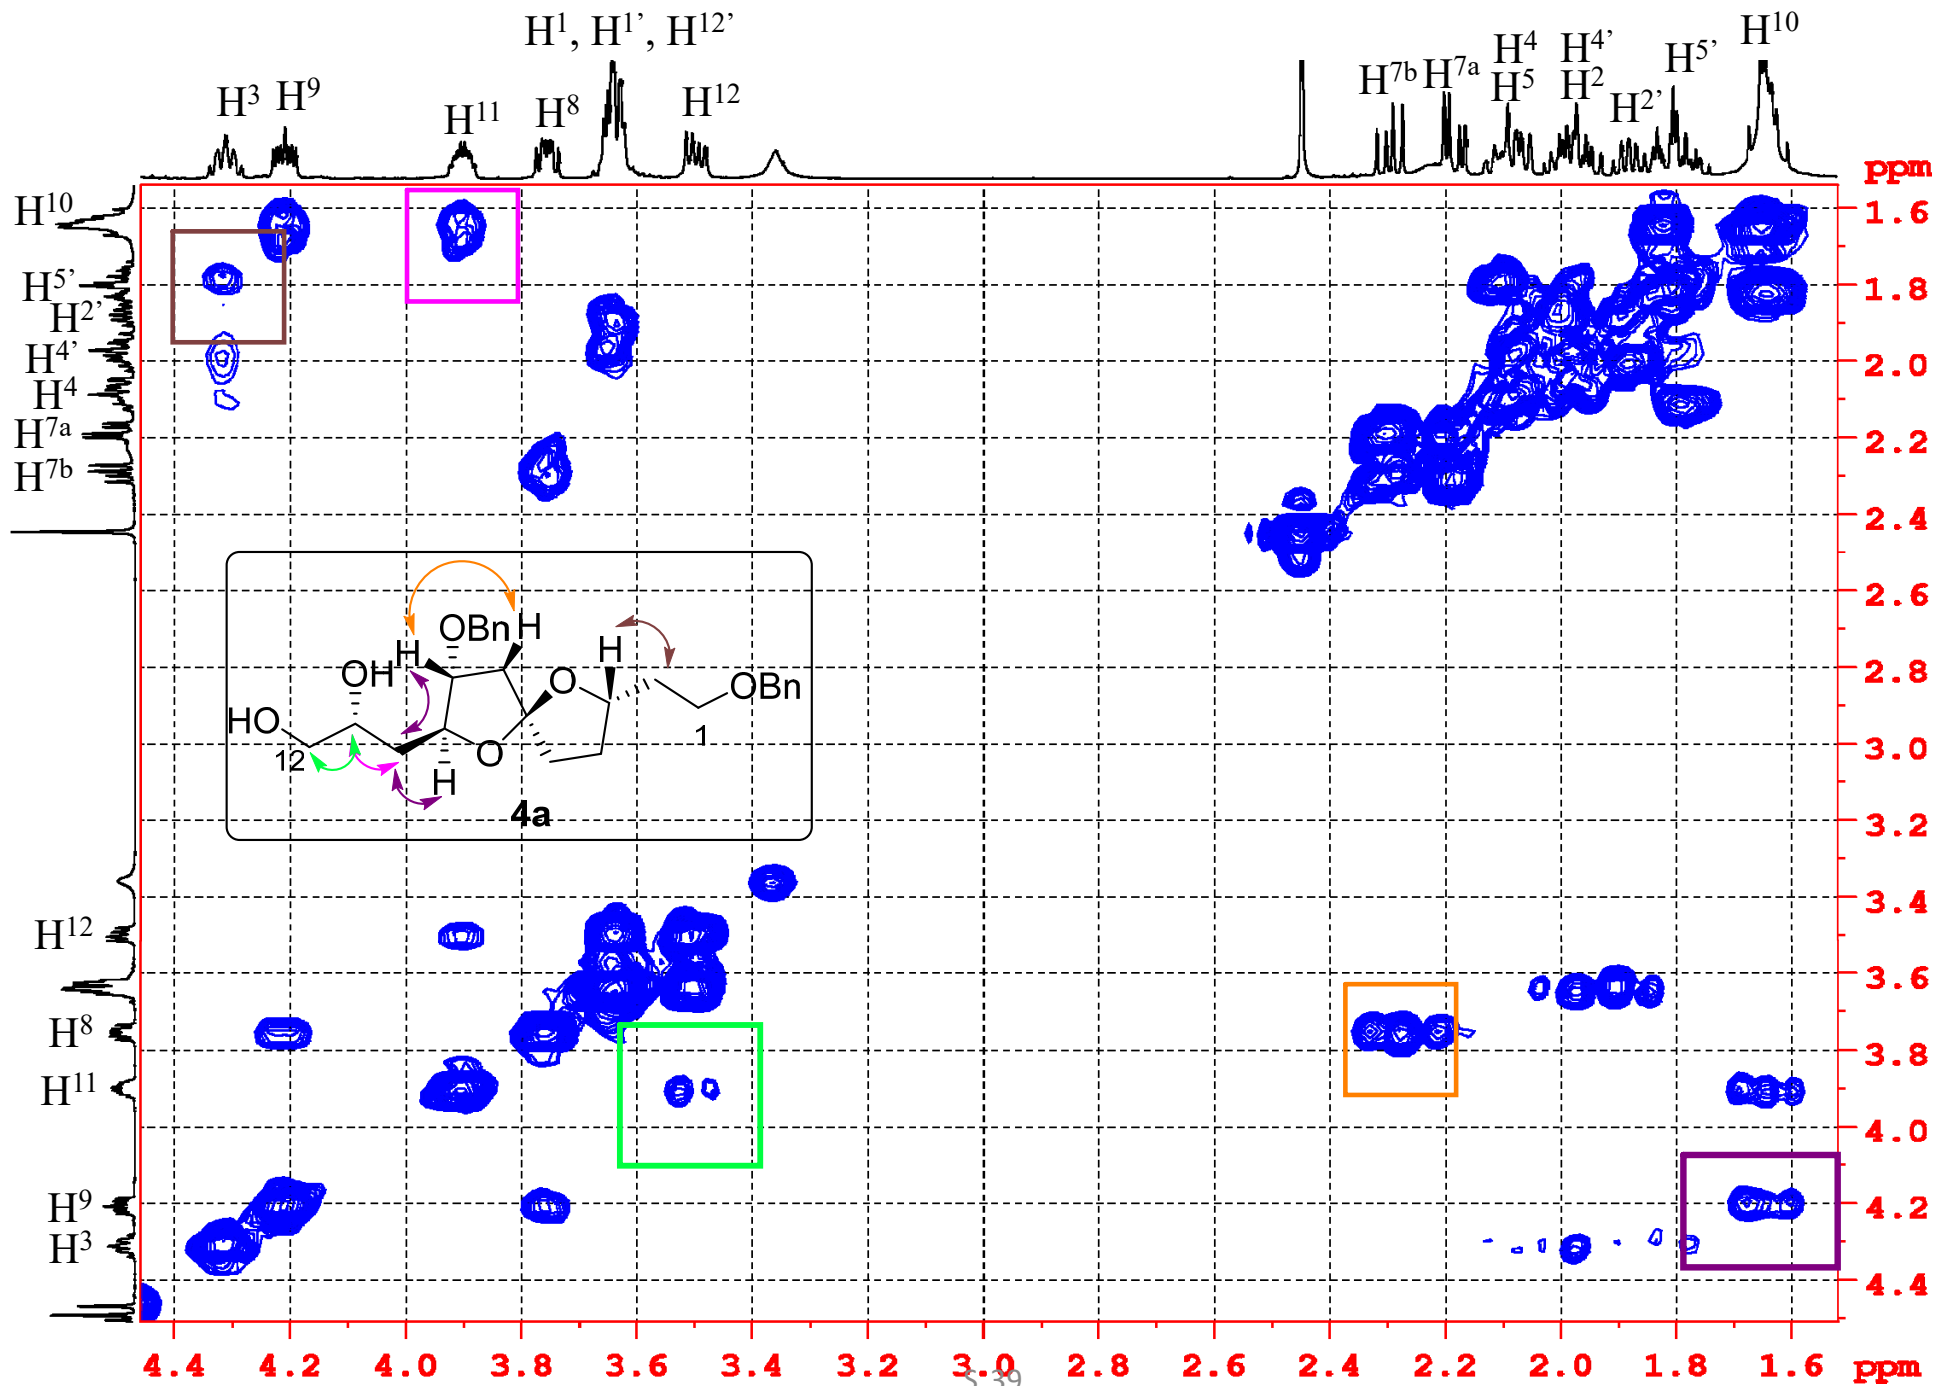

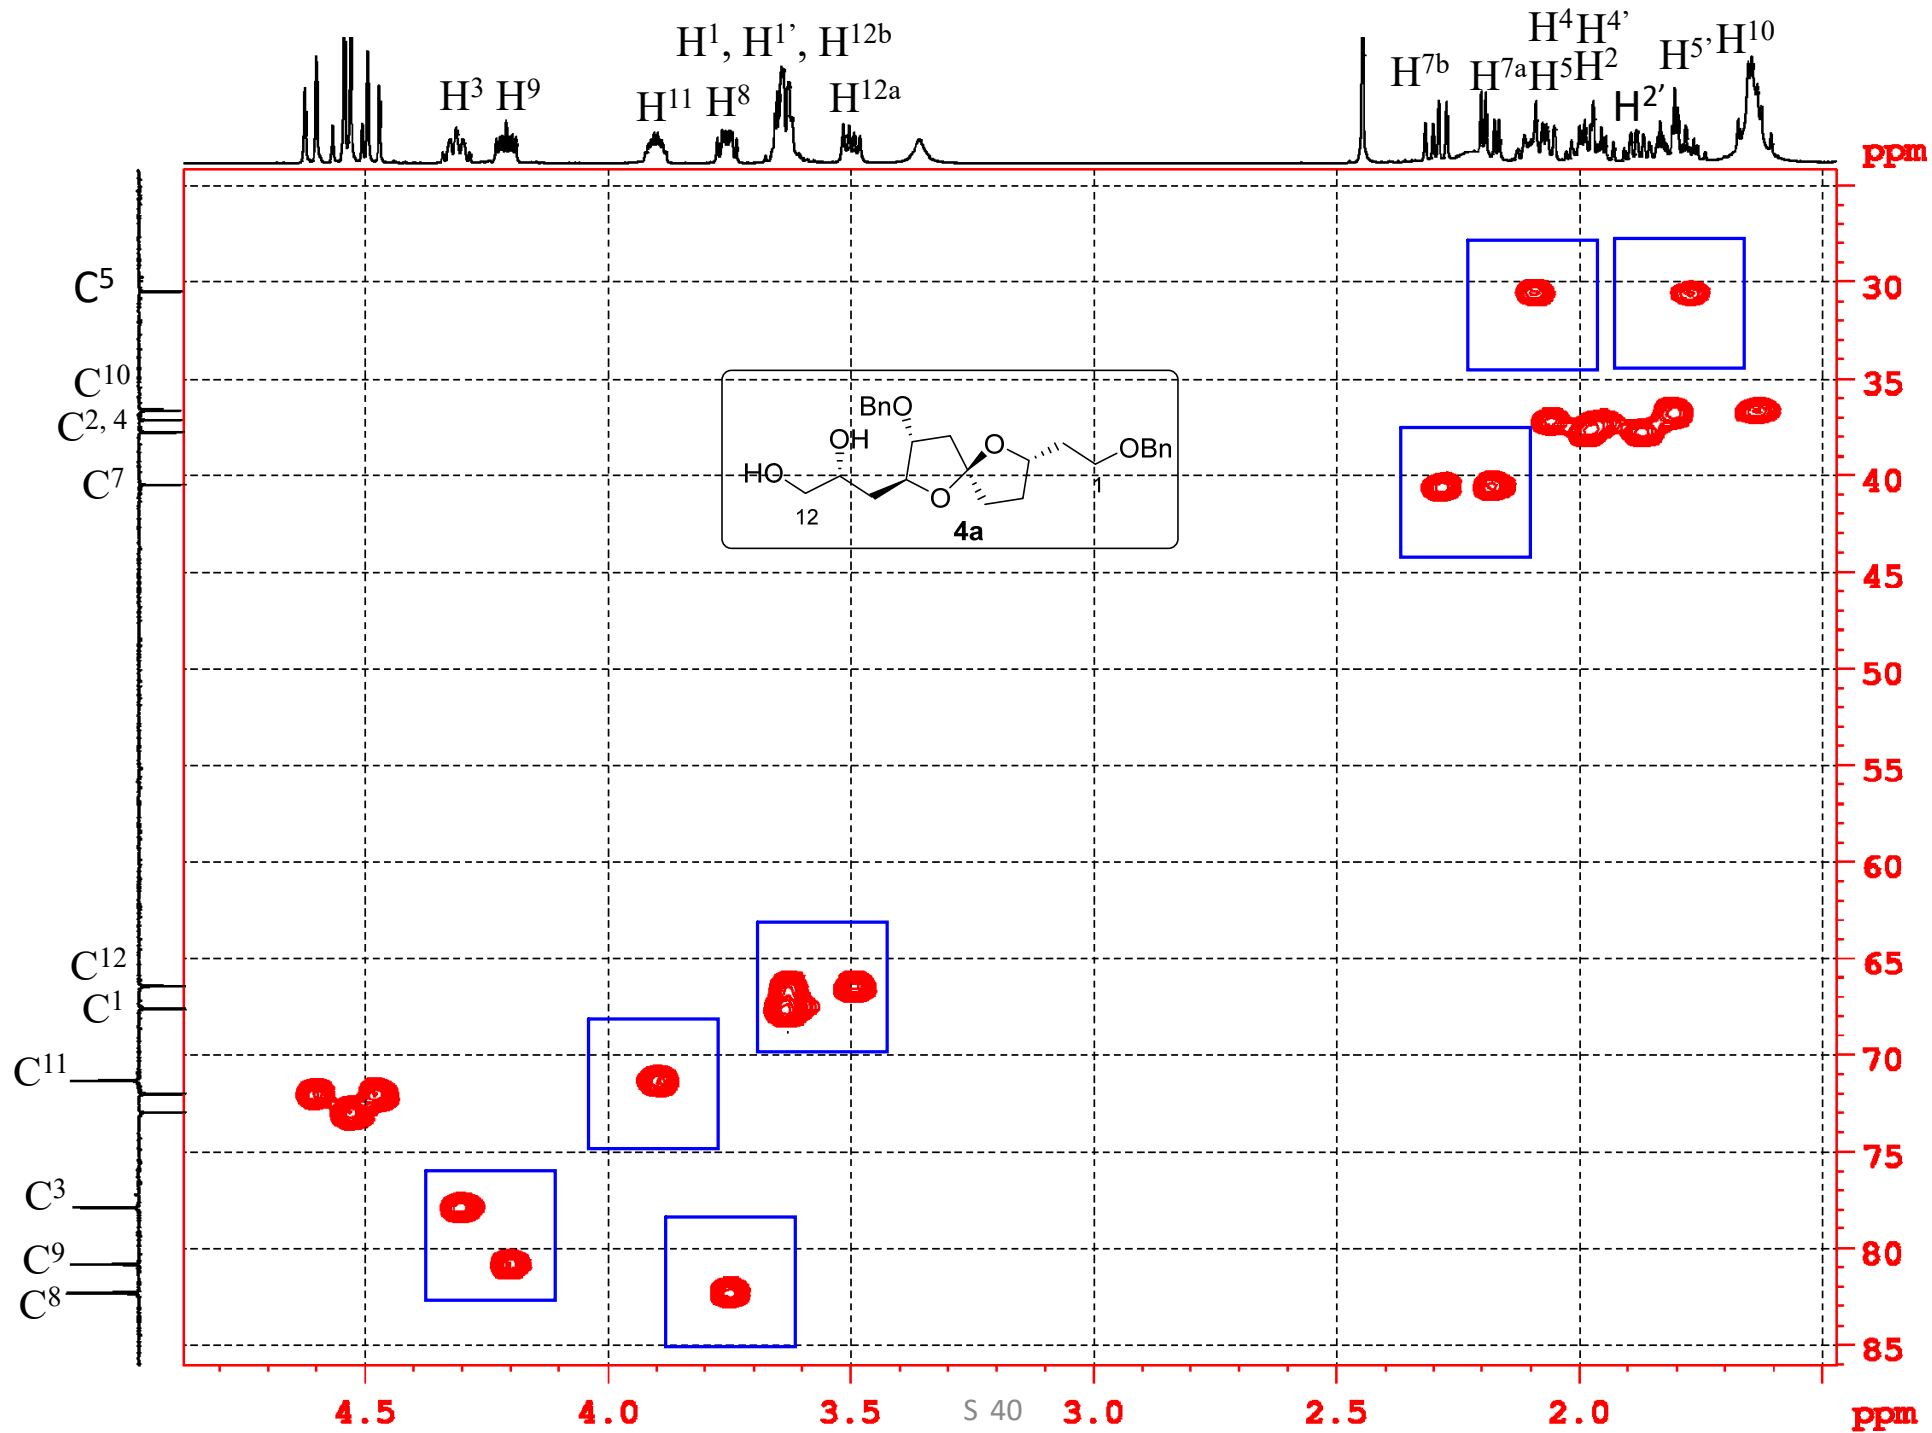



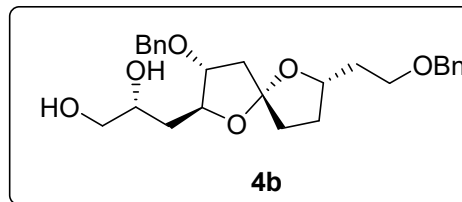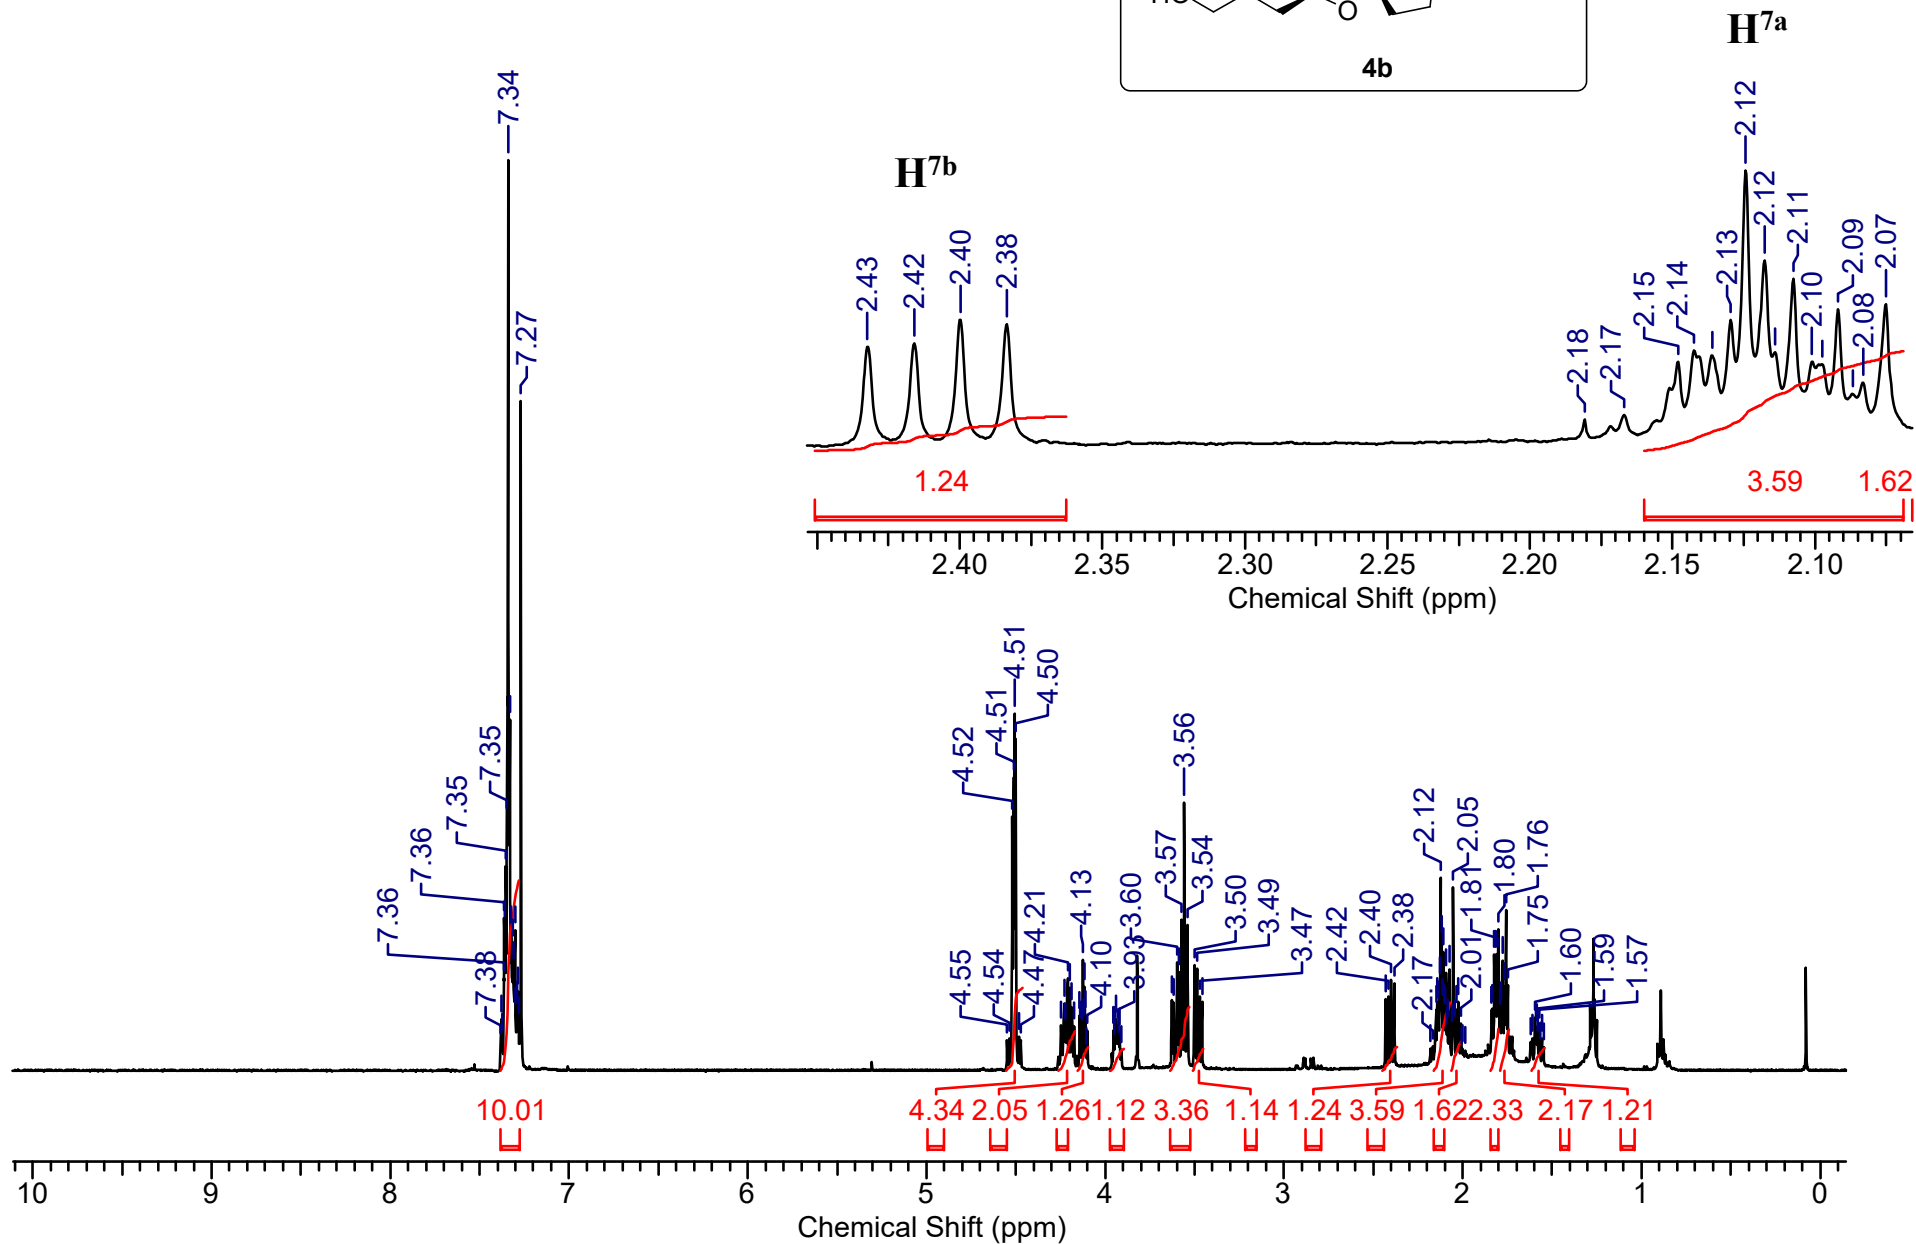

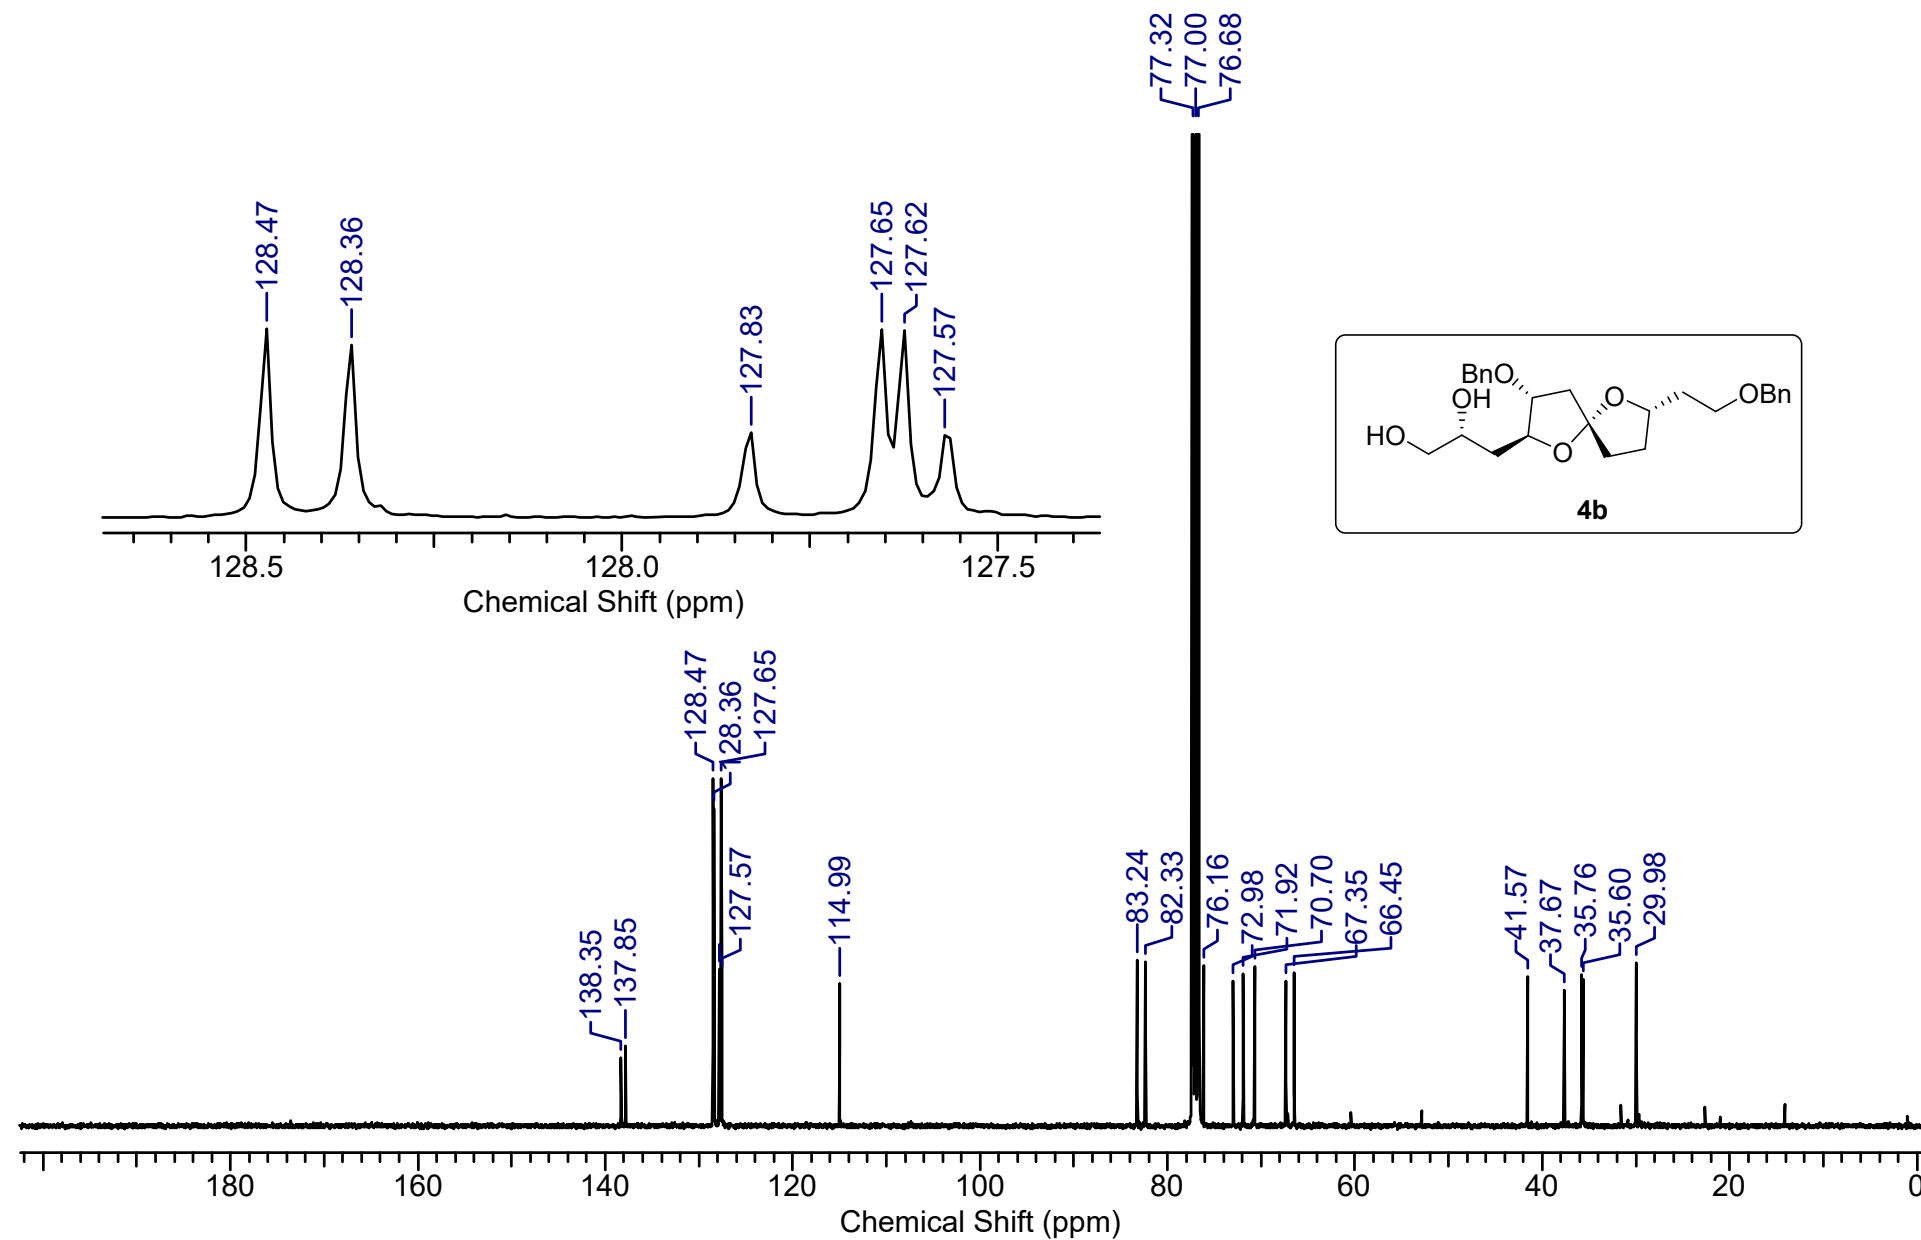

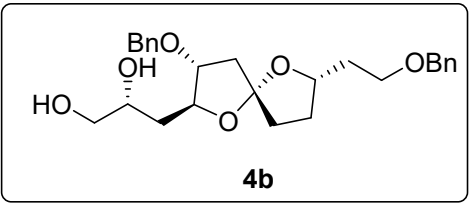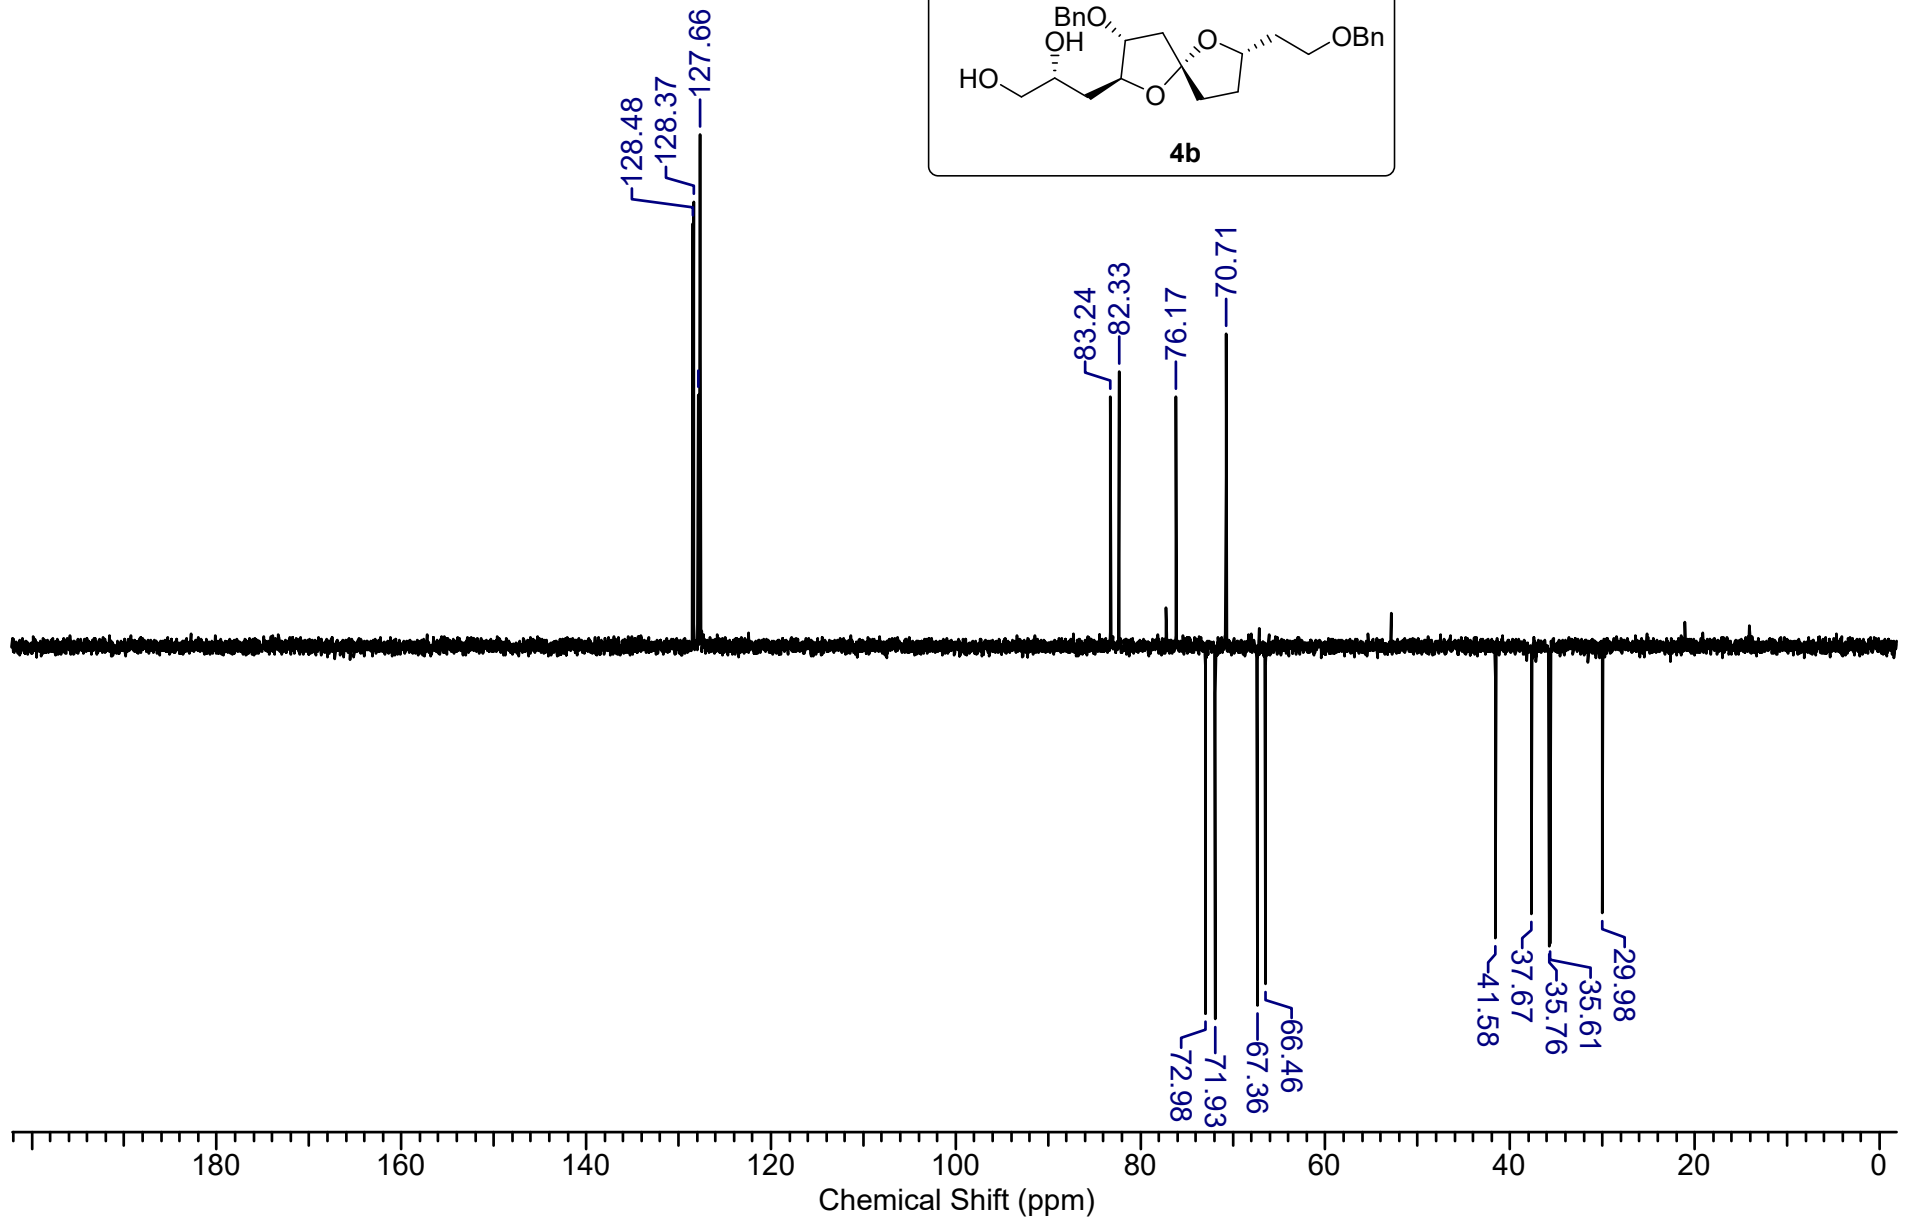

MSH-309-2 #289 RT: 1.60 AV: 1 NL: 1.38E8  
T: FTMS + p ESI Full ms [100.0000-1500.0000]

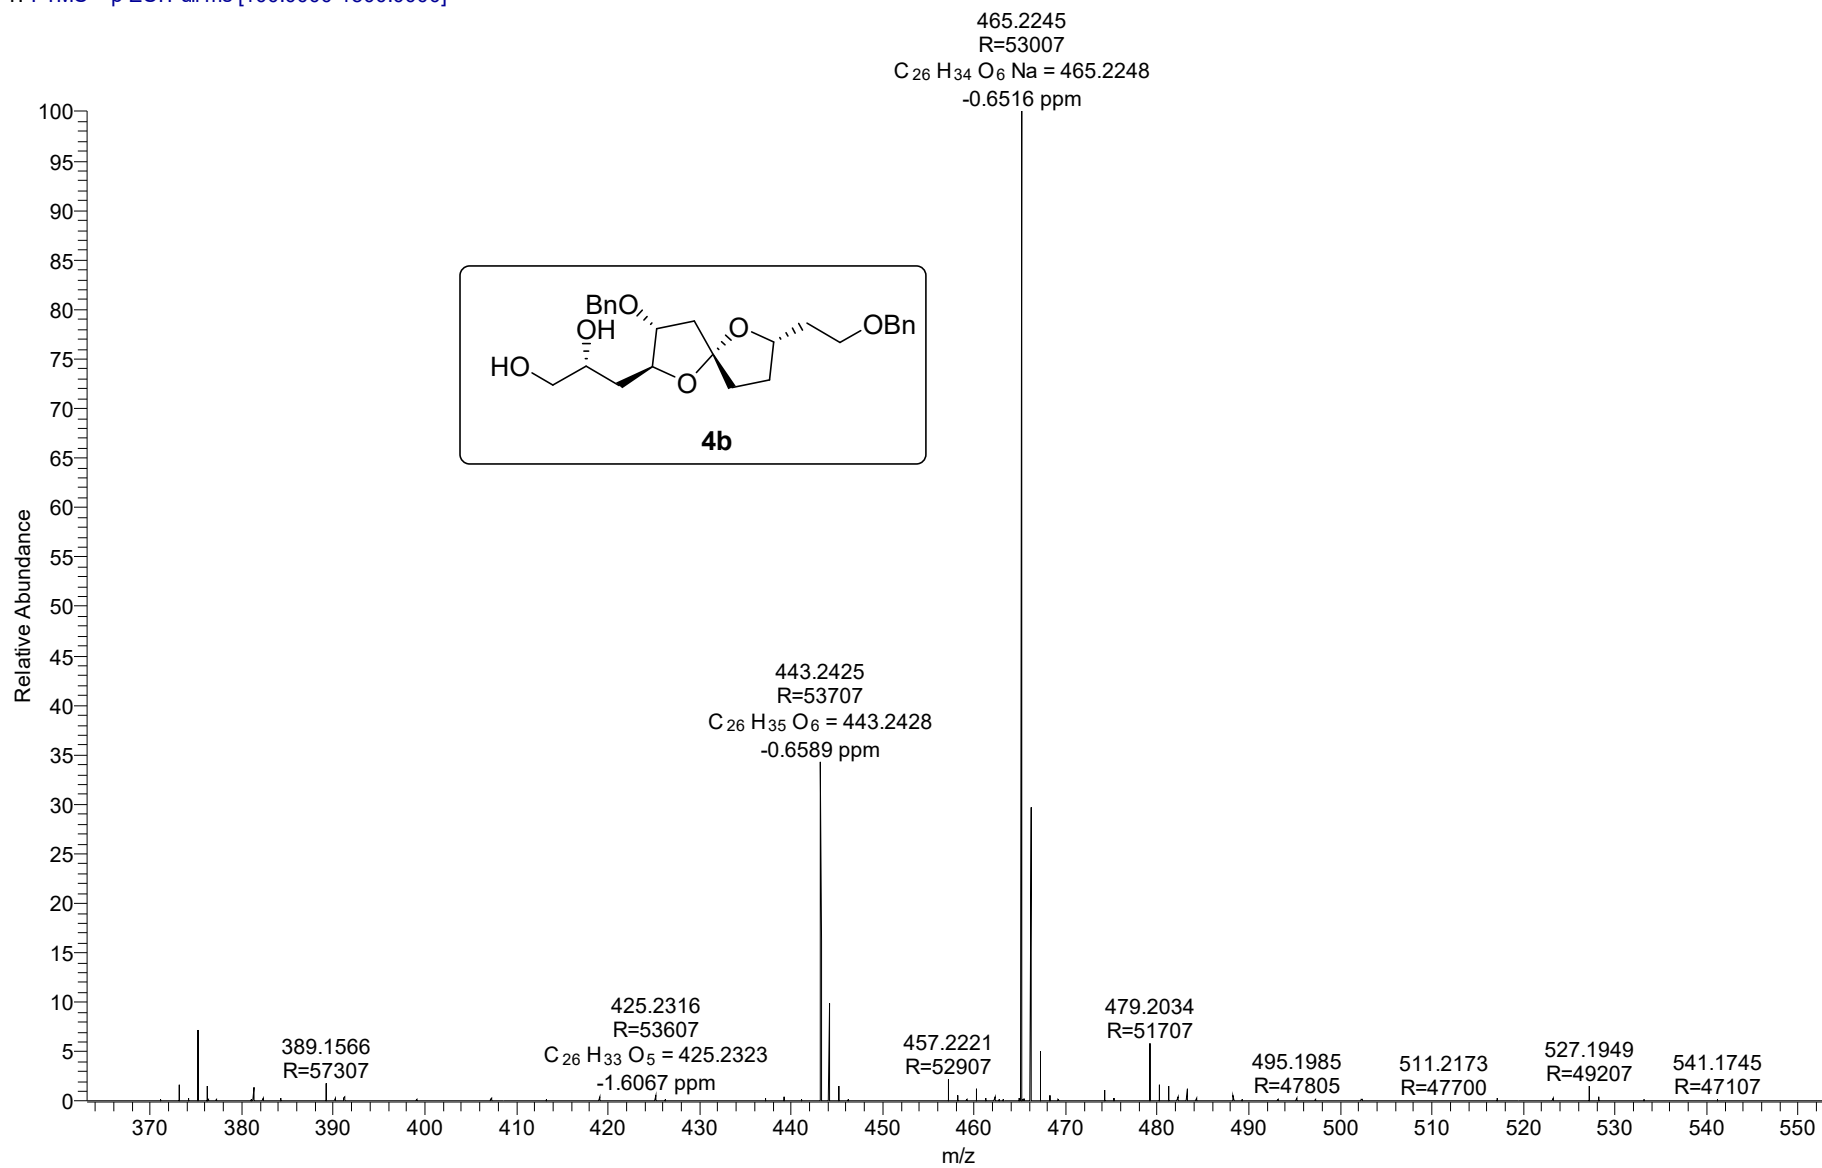

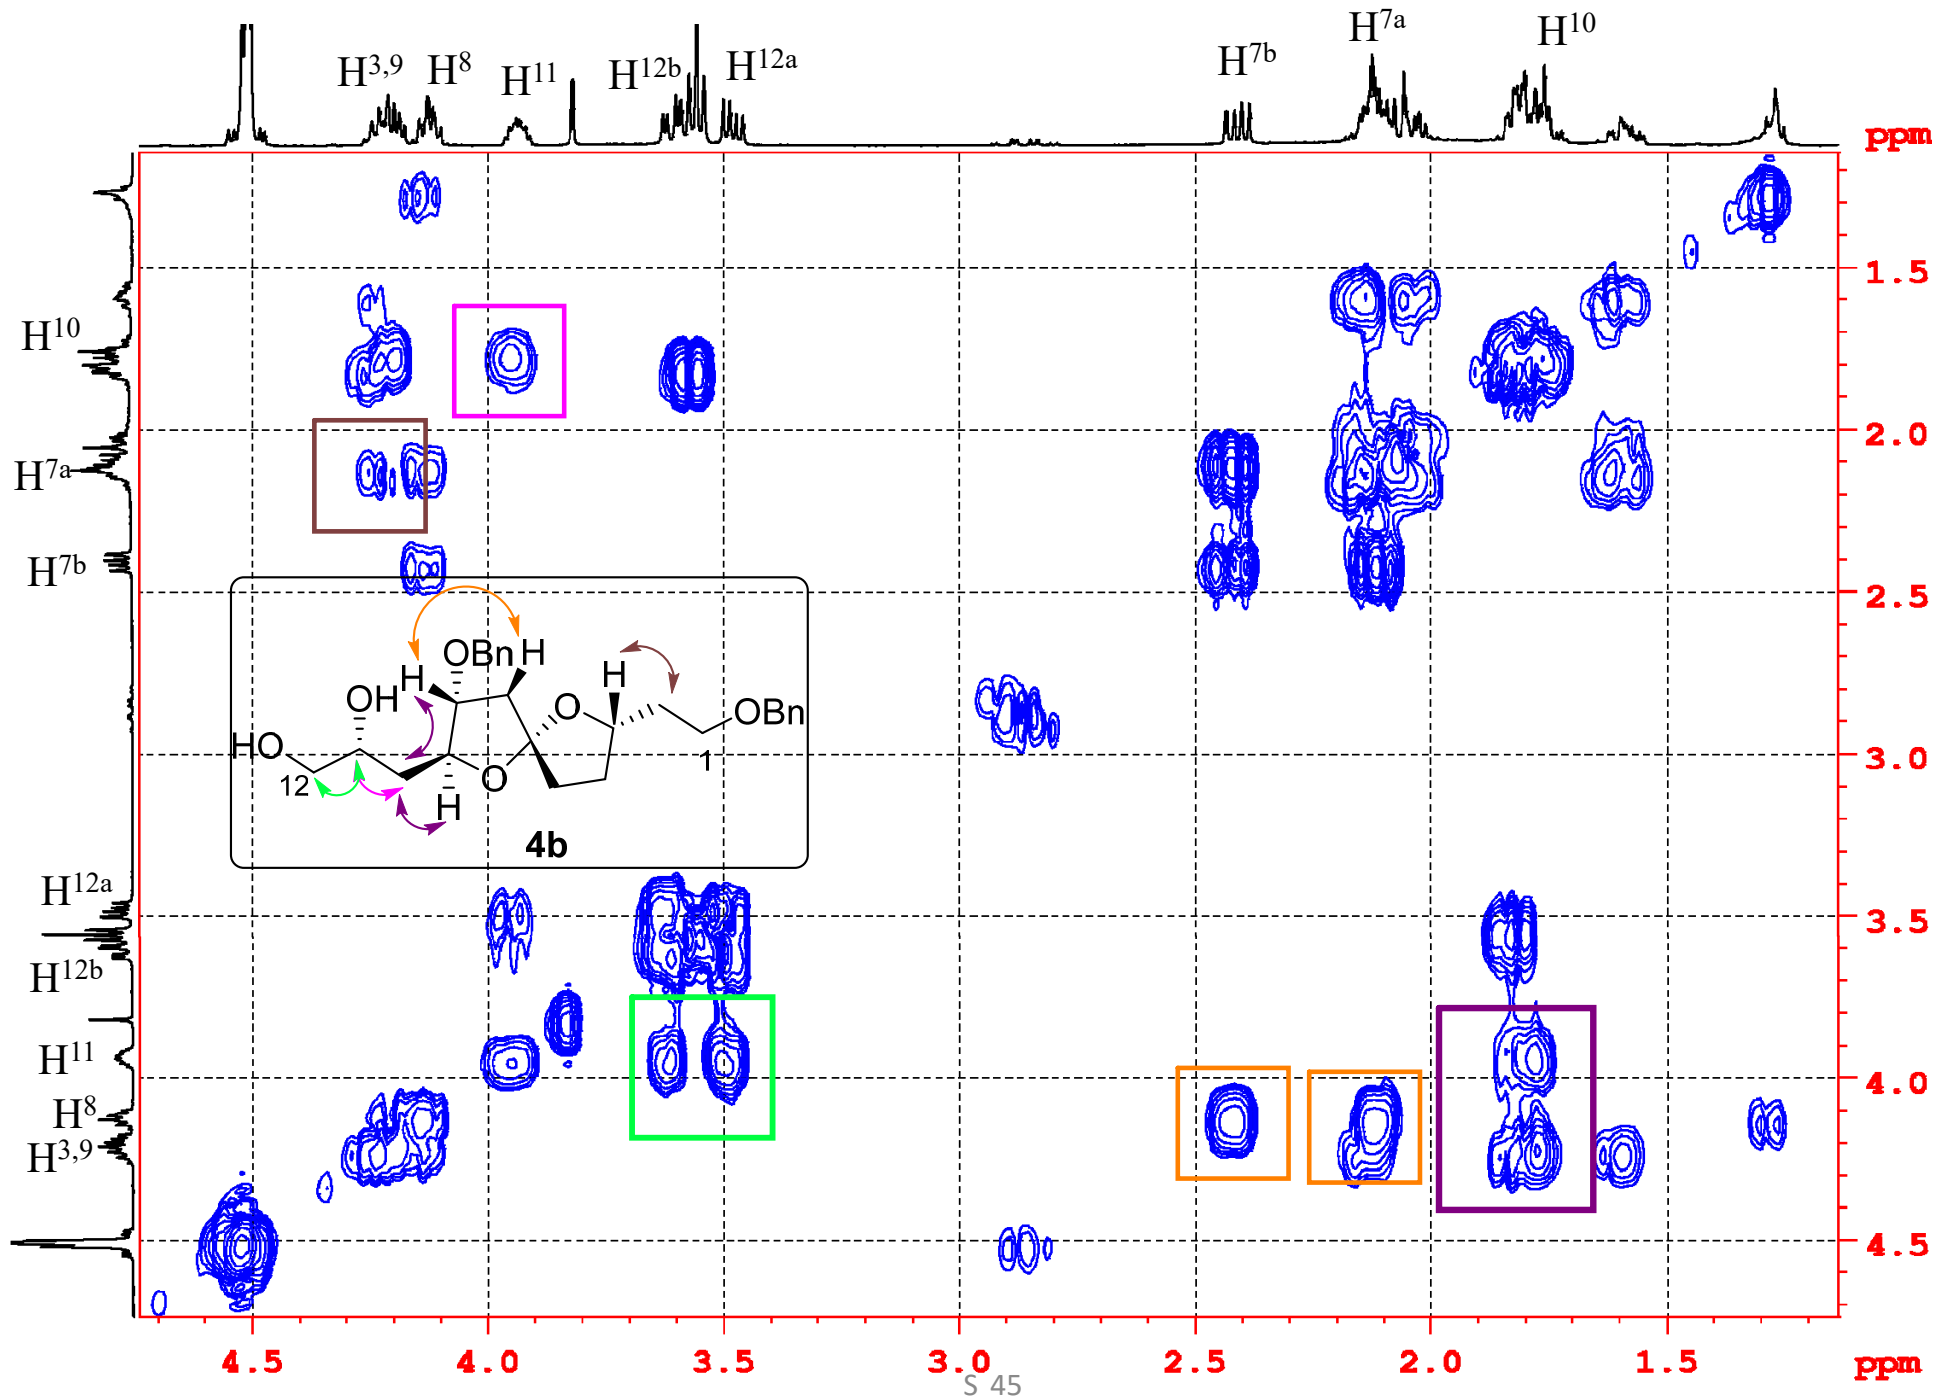

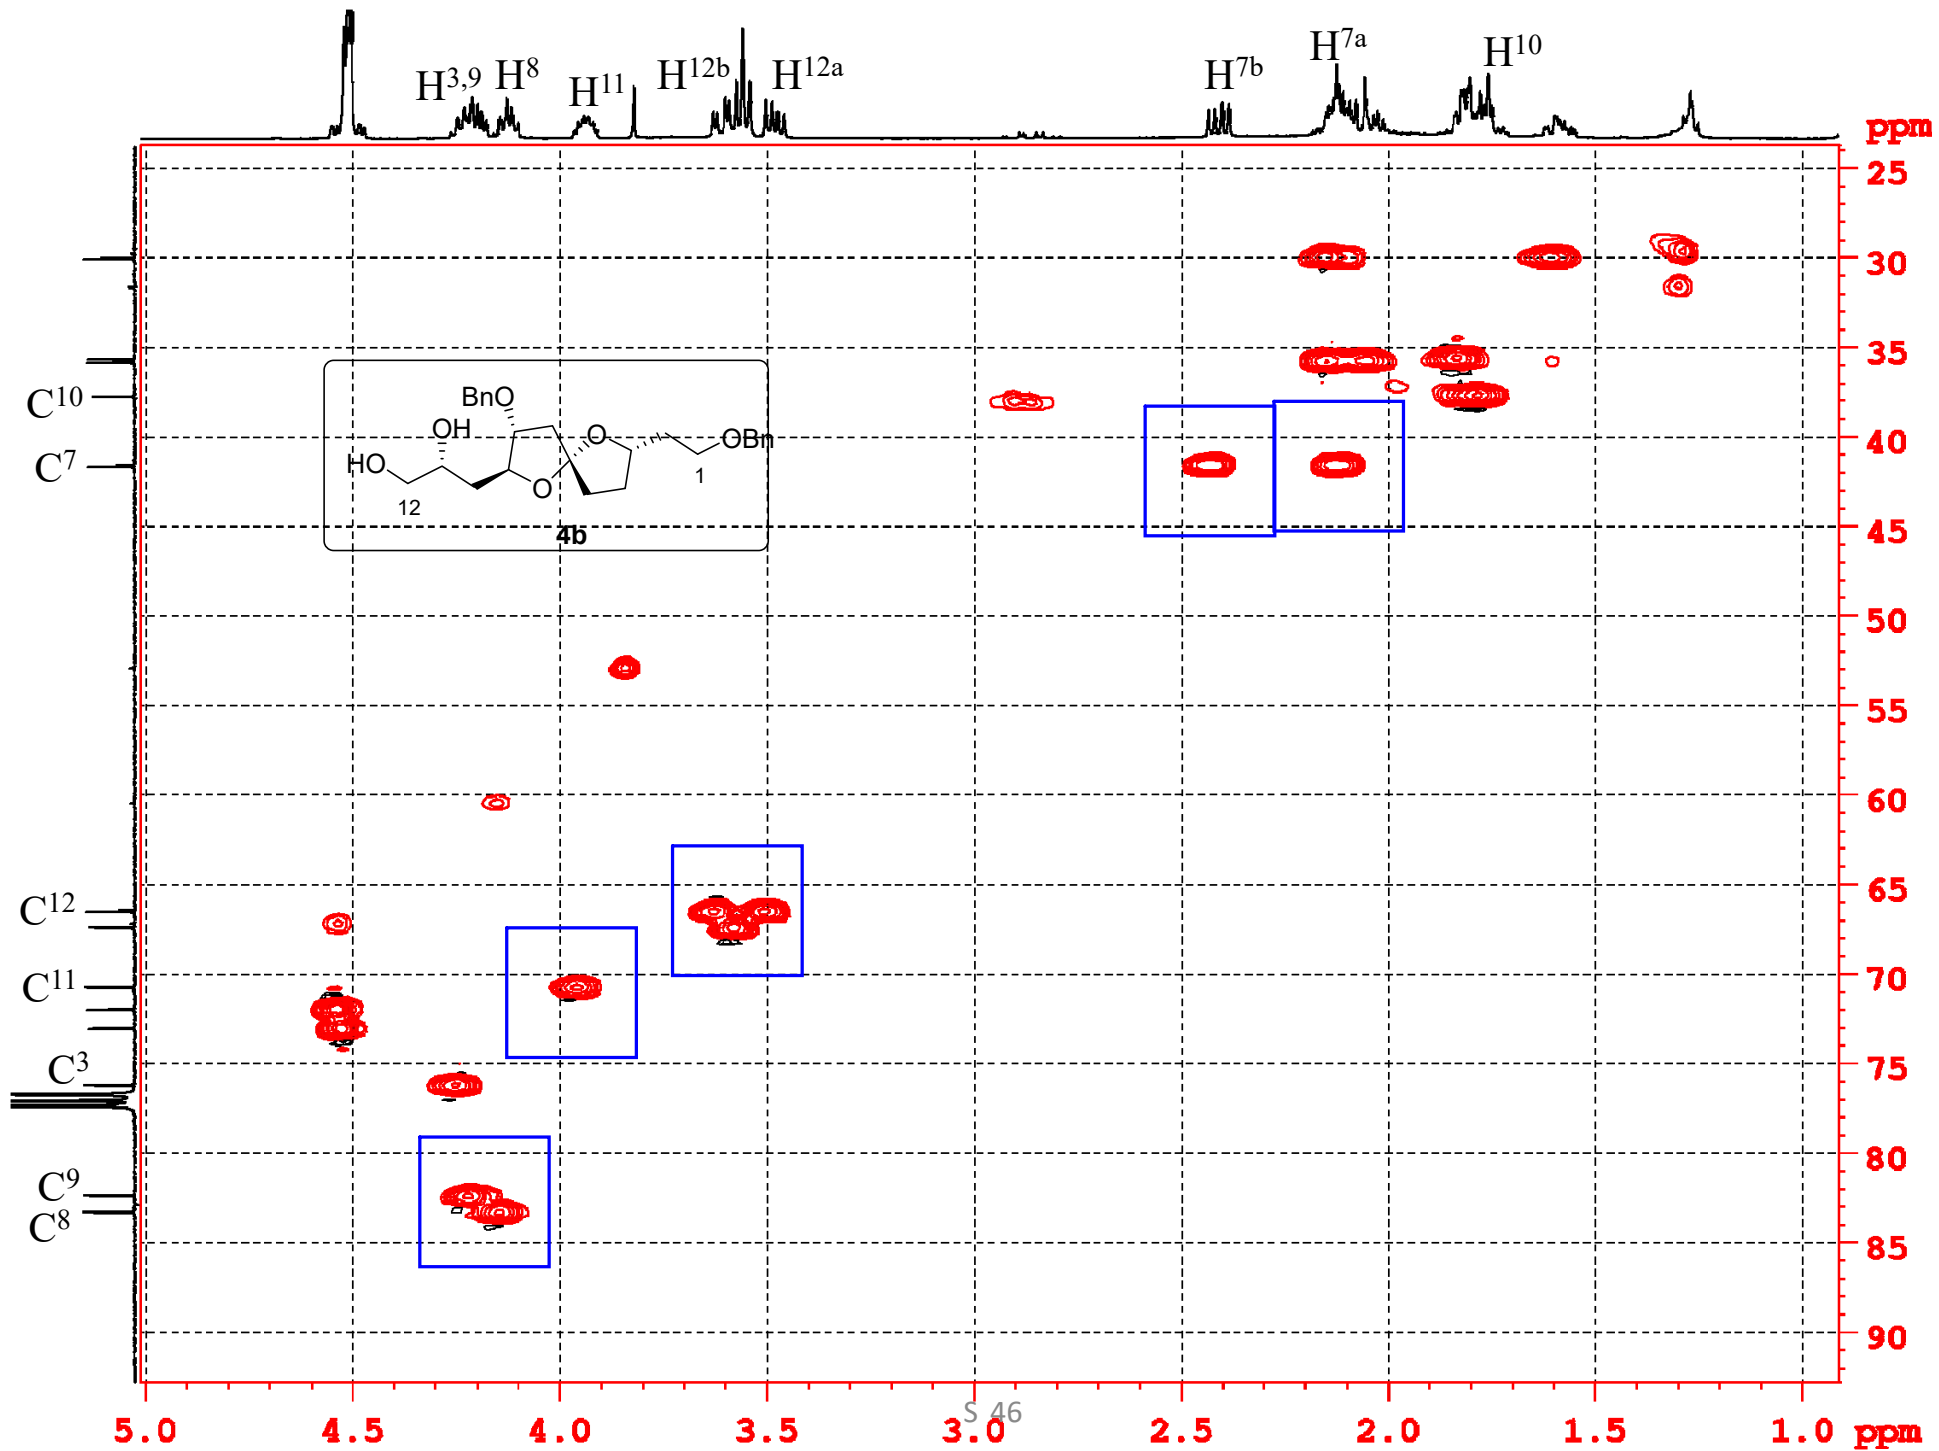

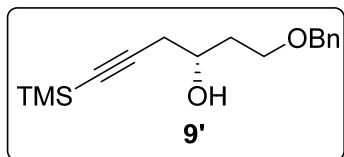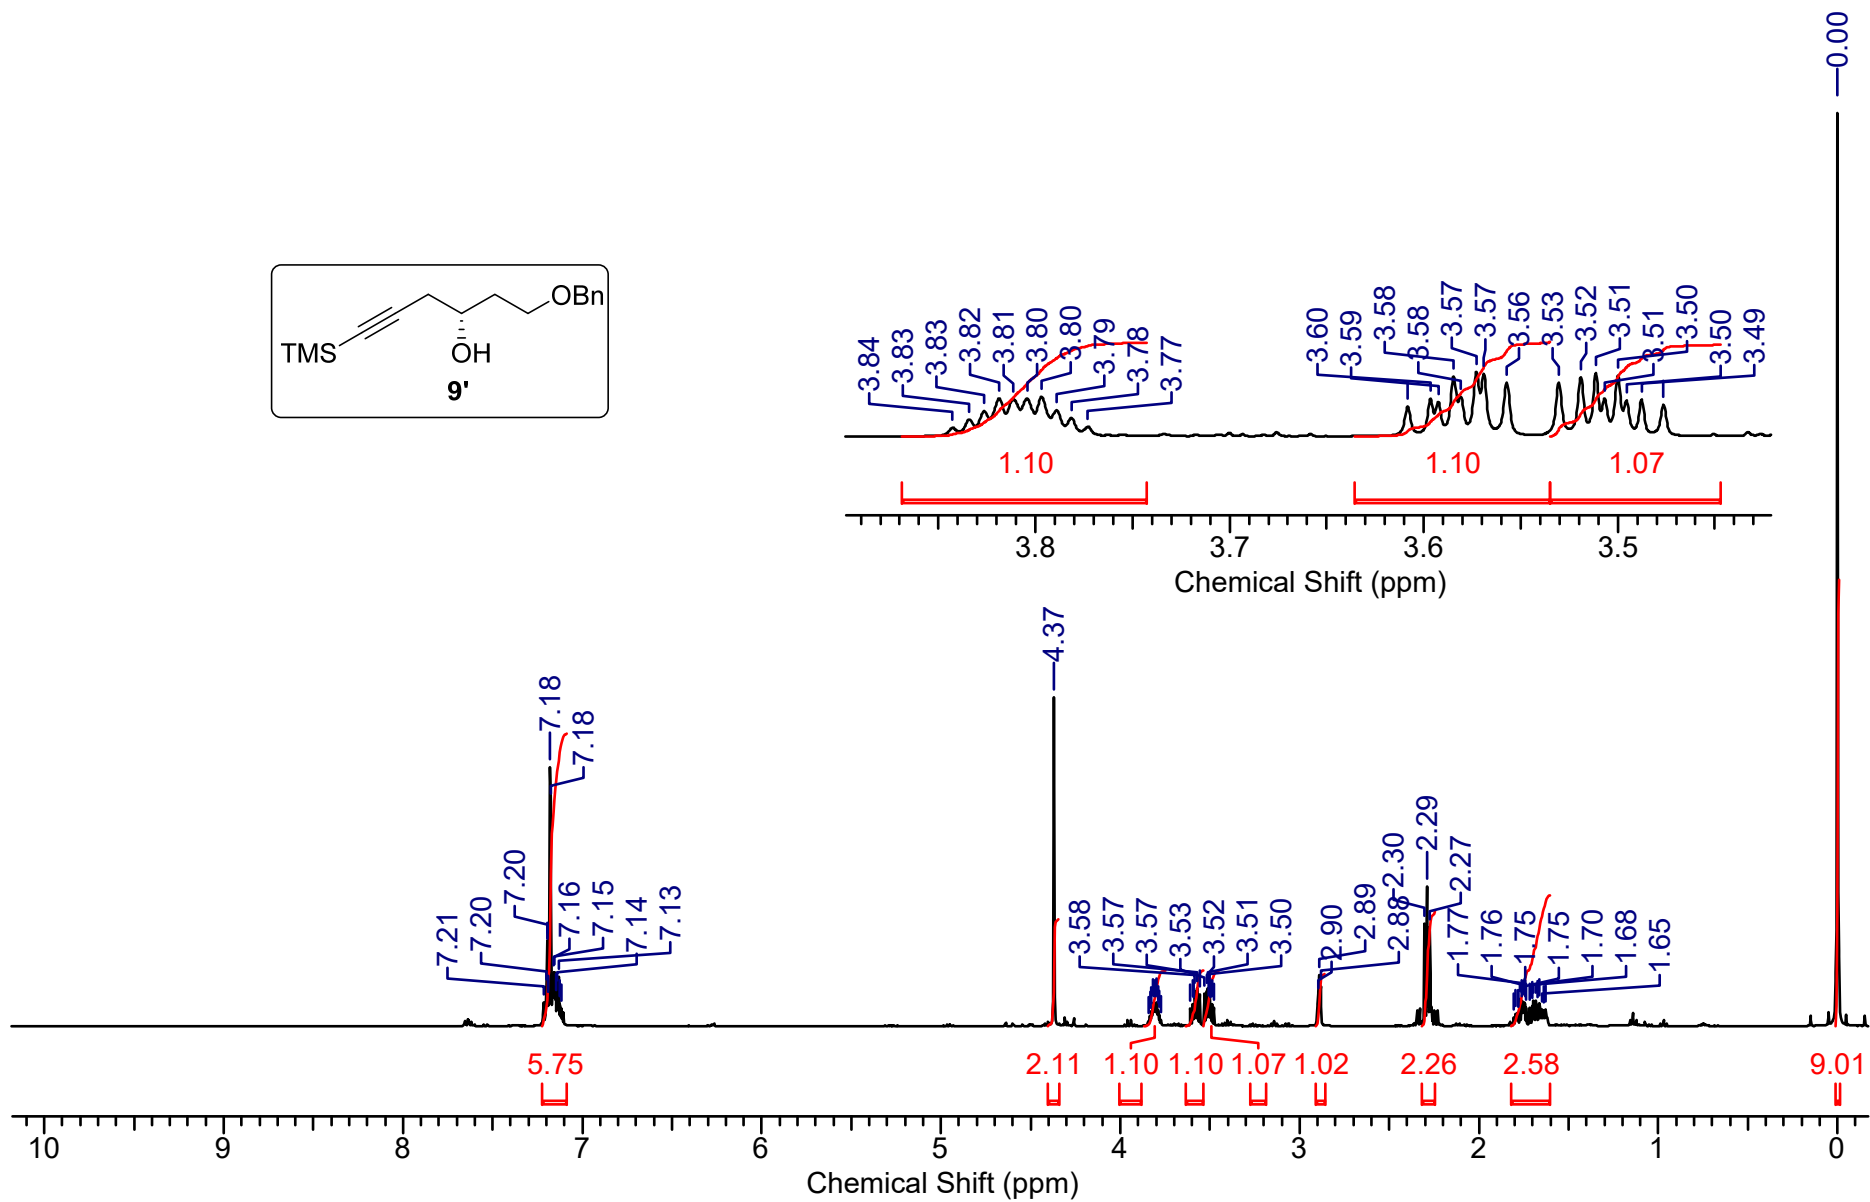

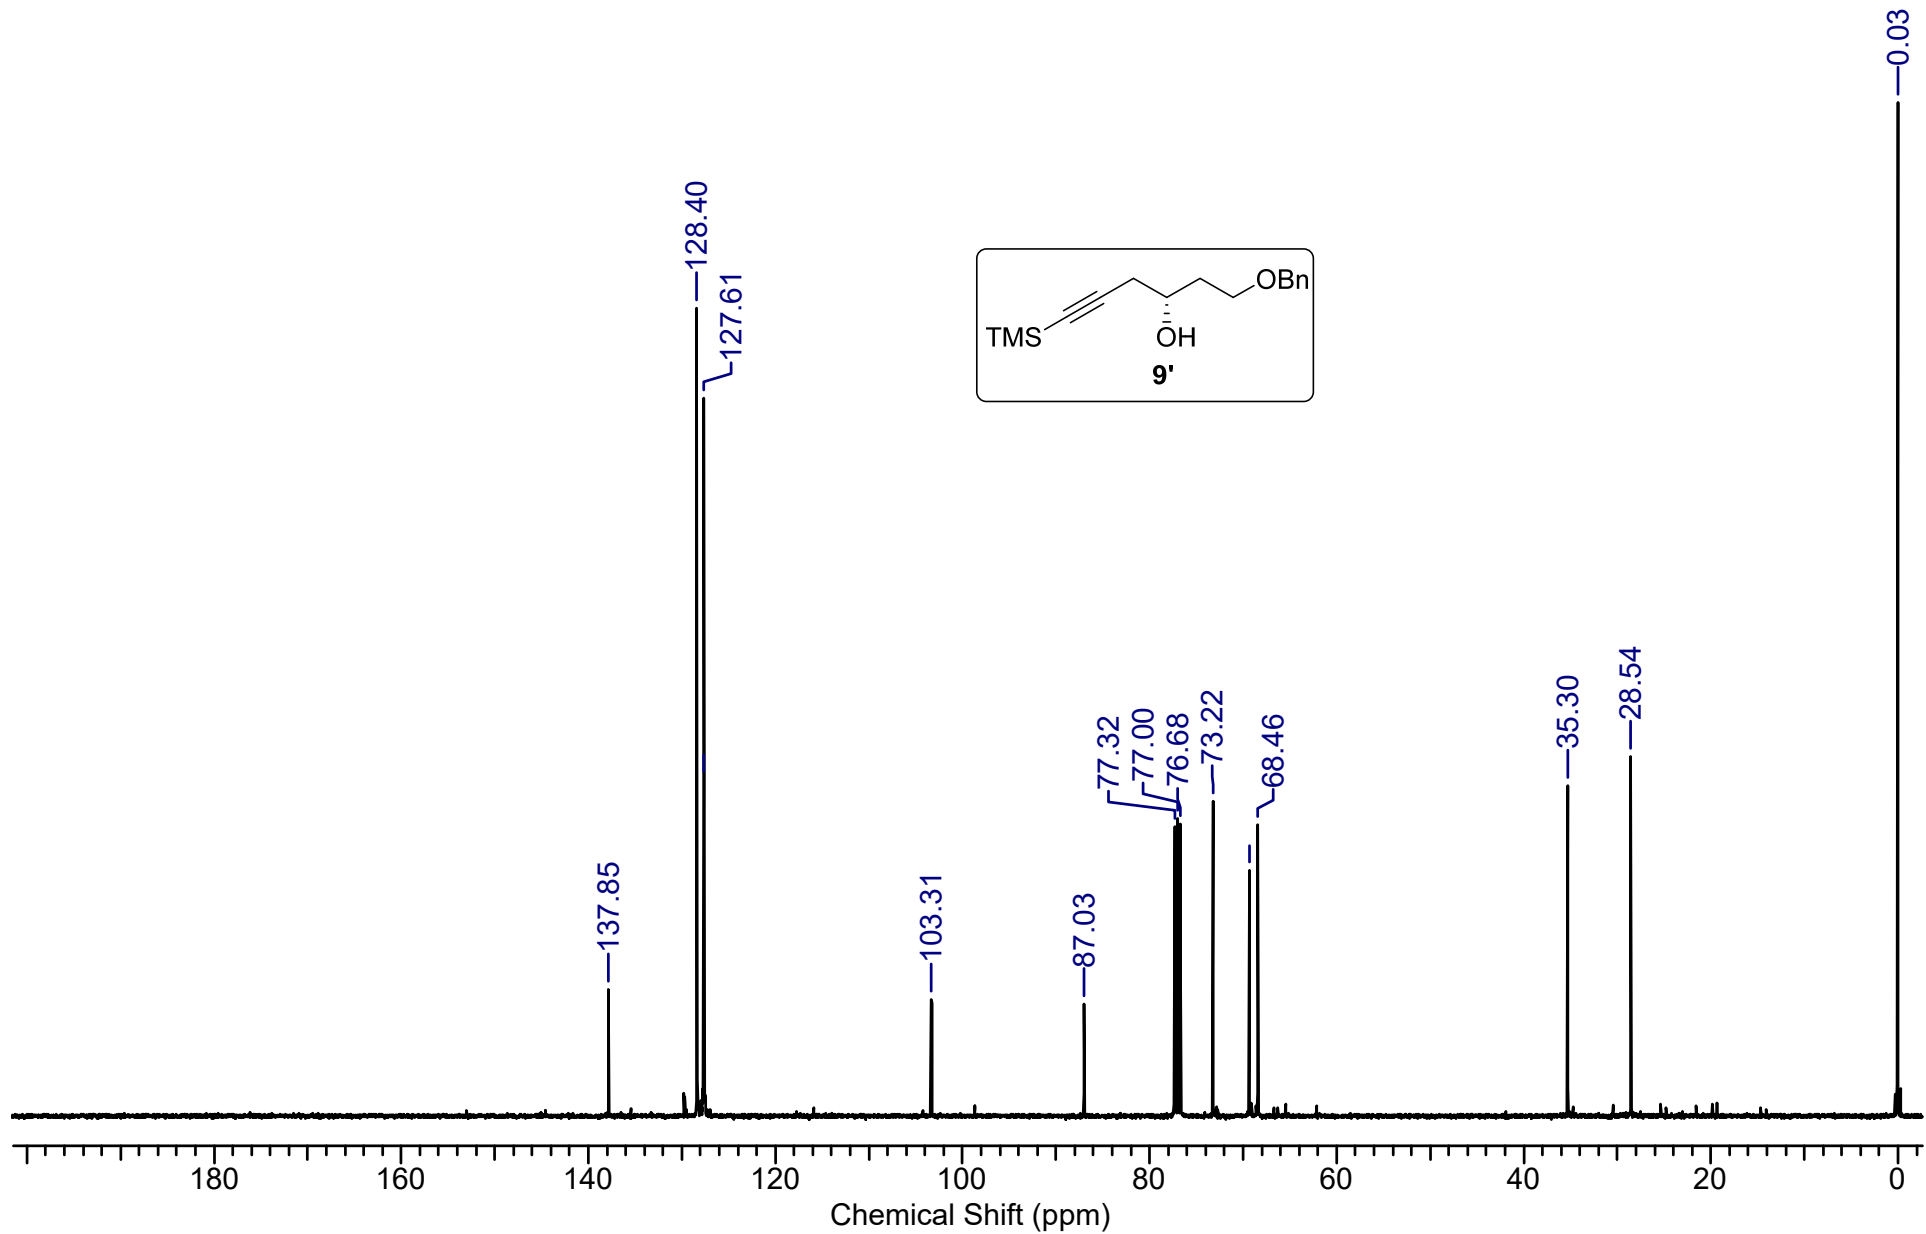



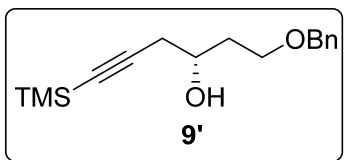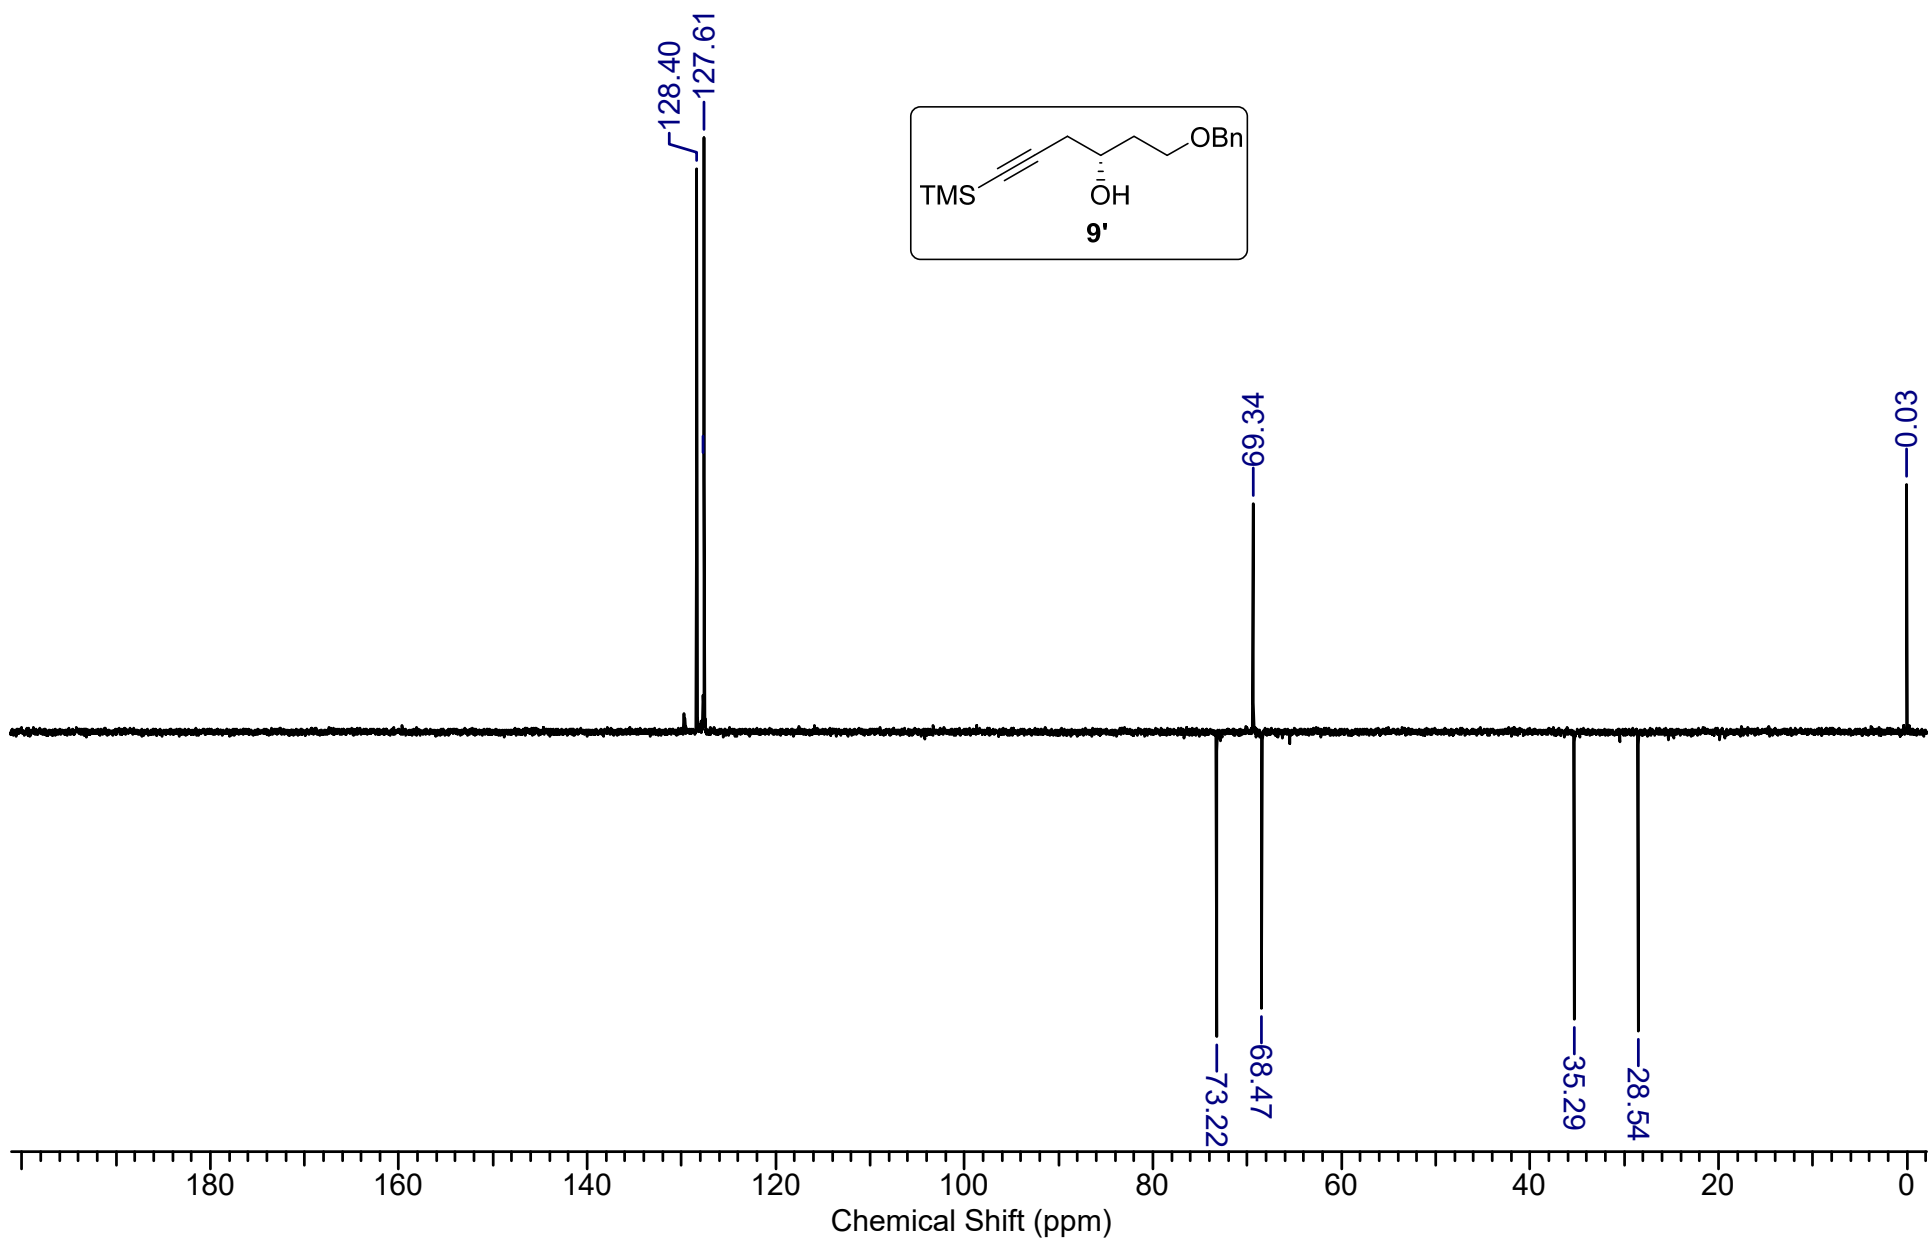

MSH-304 #363 RT: 1.99 AV: 1 NL: 2.25E9  
T: FTMS + p ESIFull ms [100.0000-1500.0000]

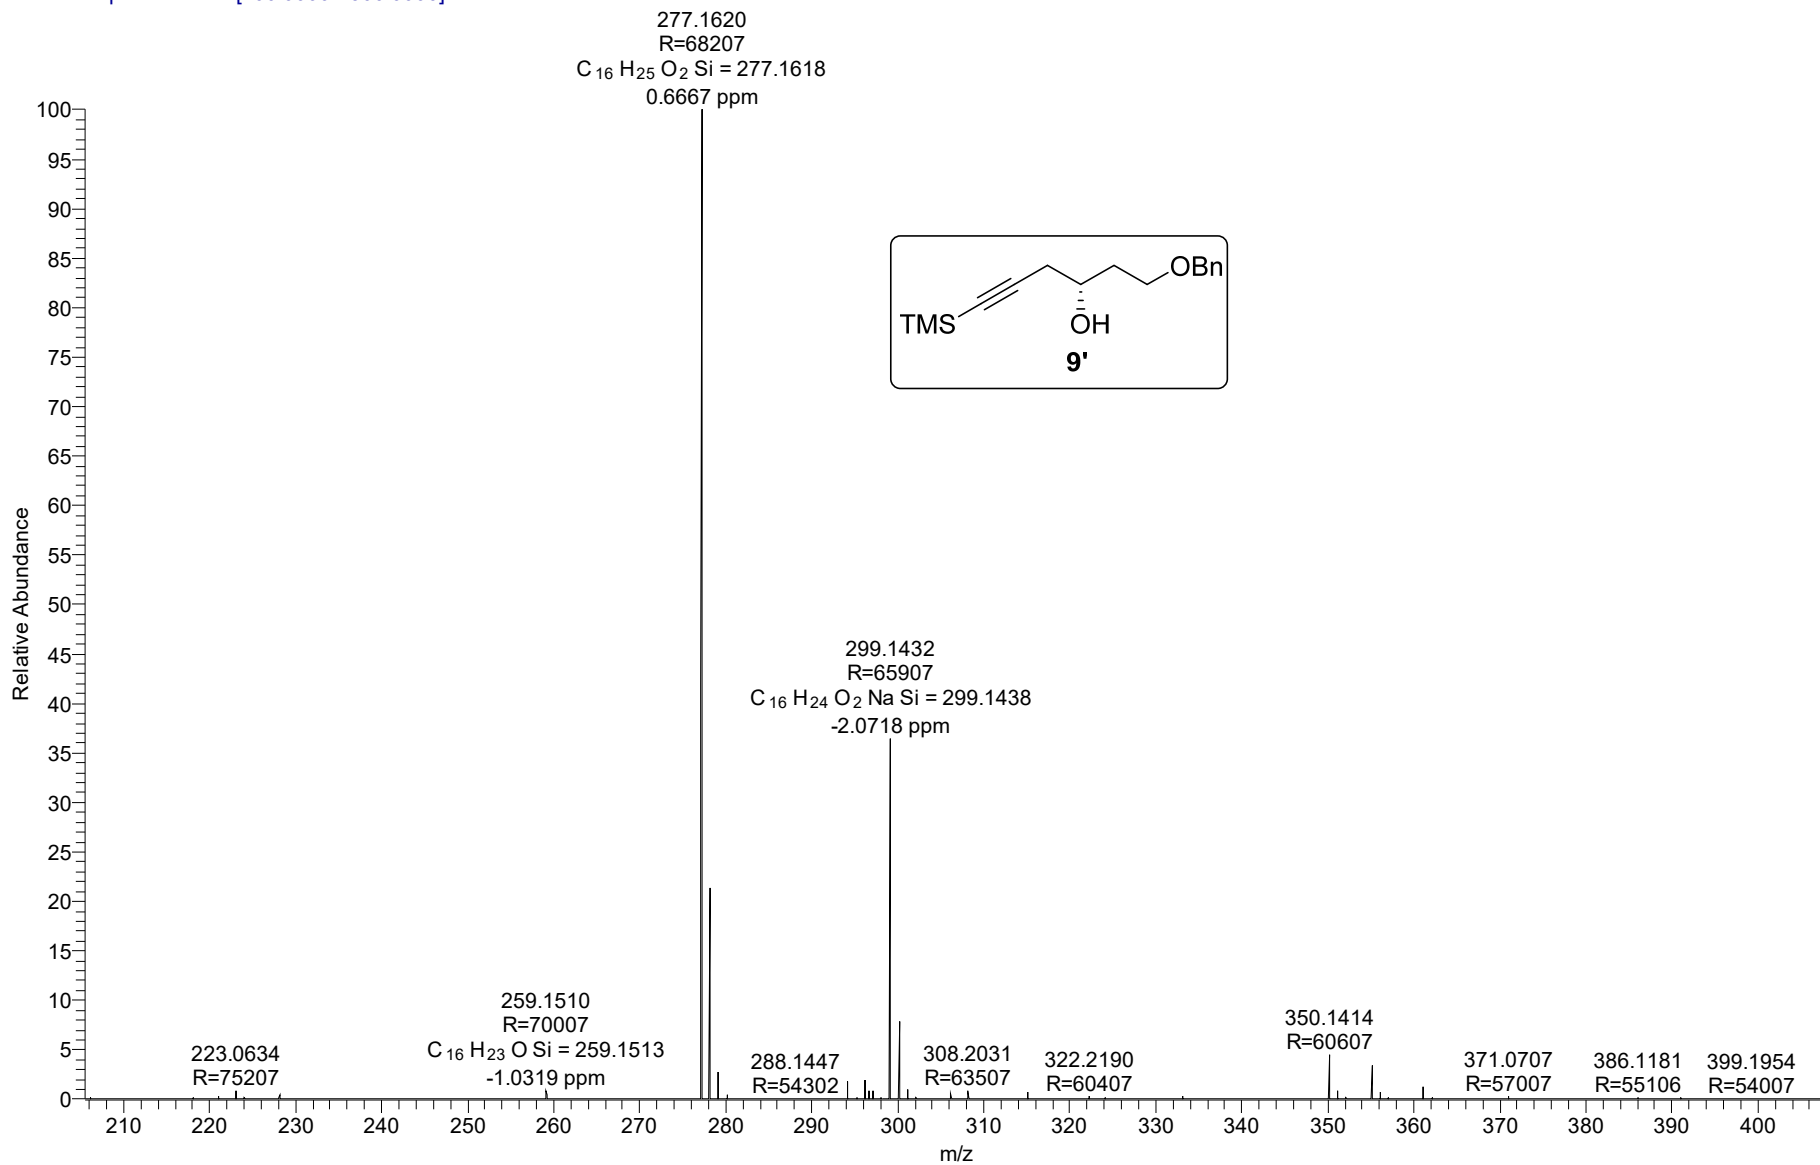

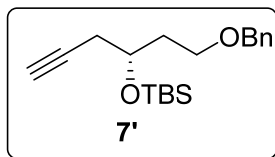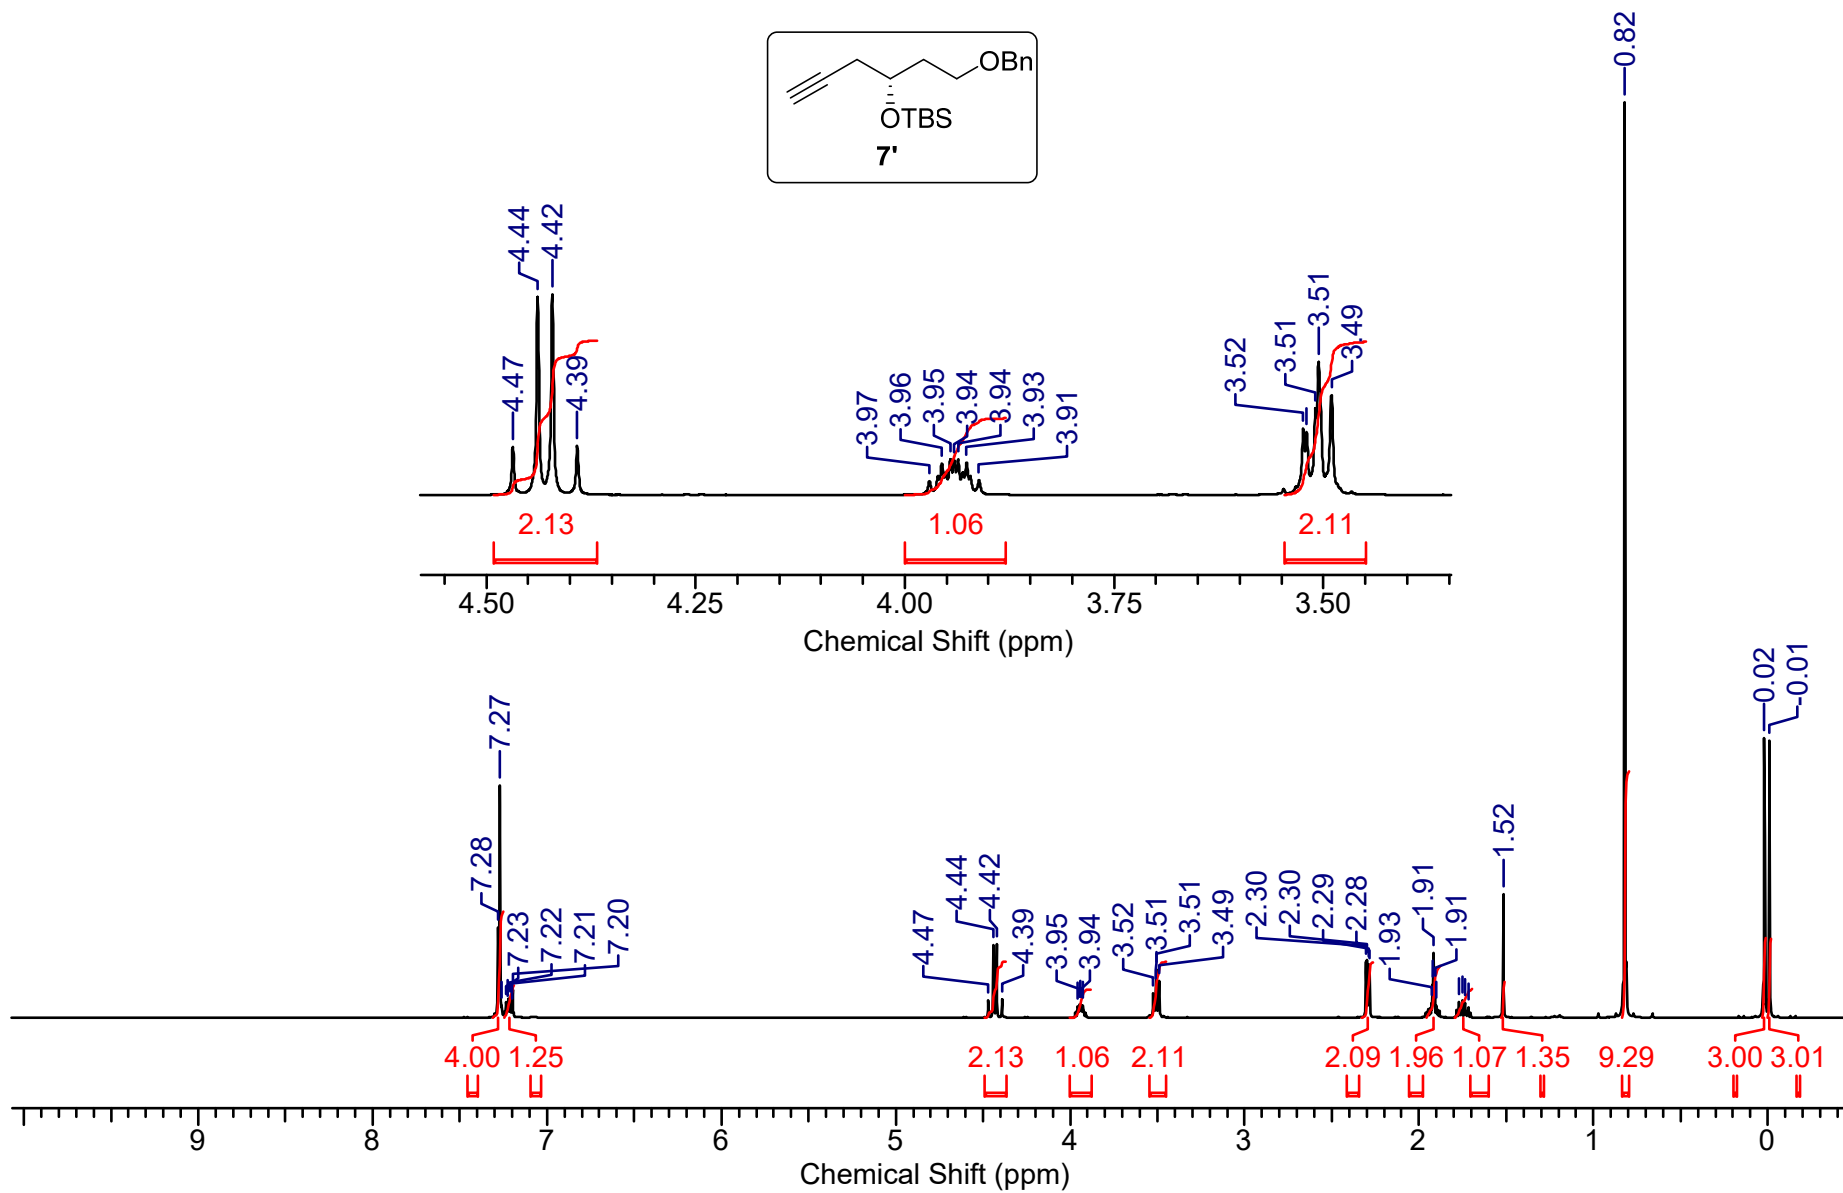

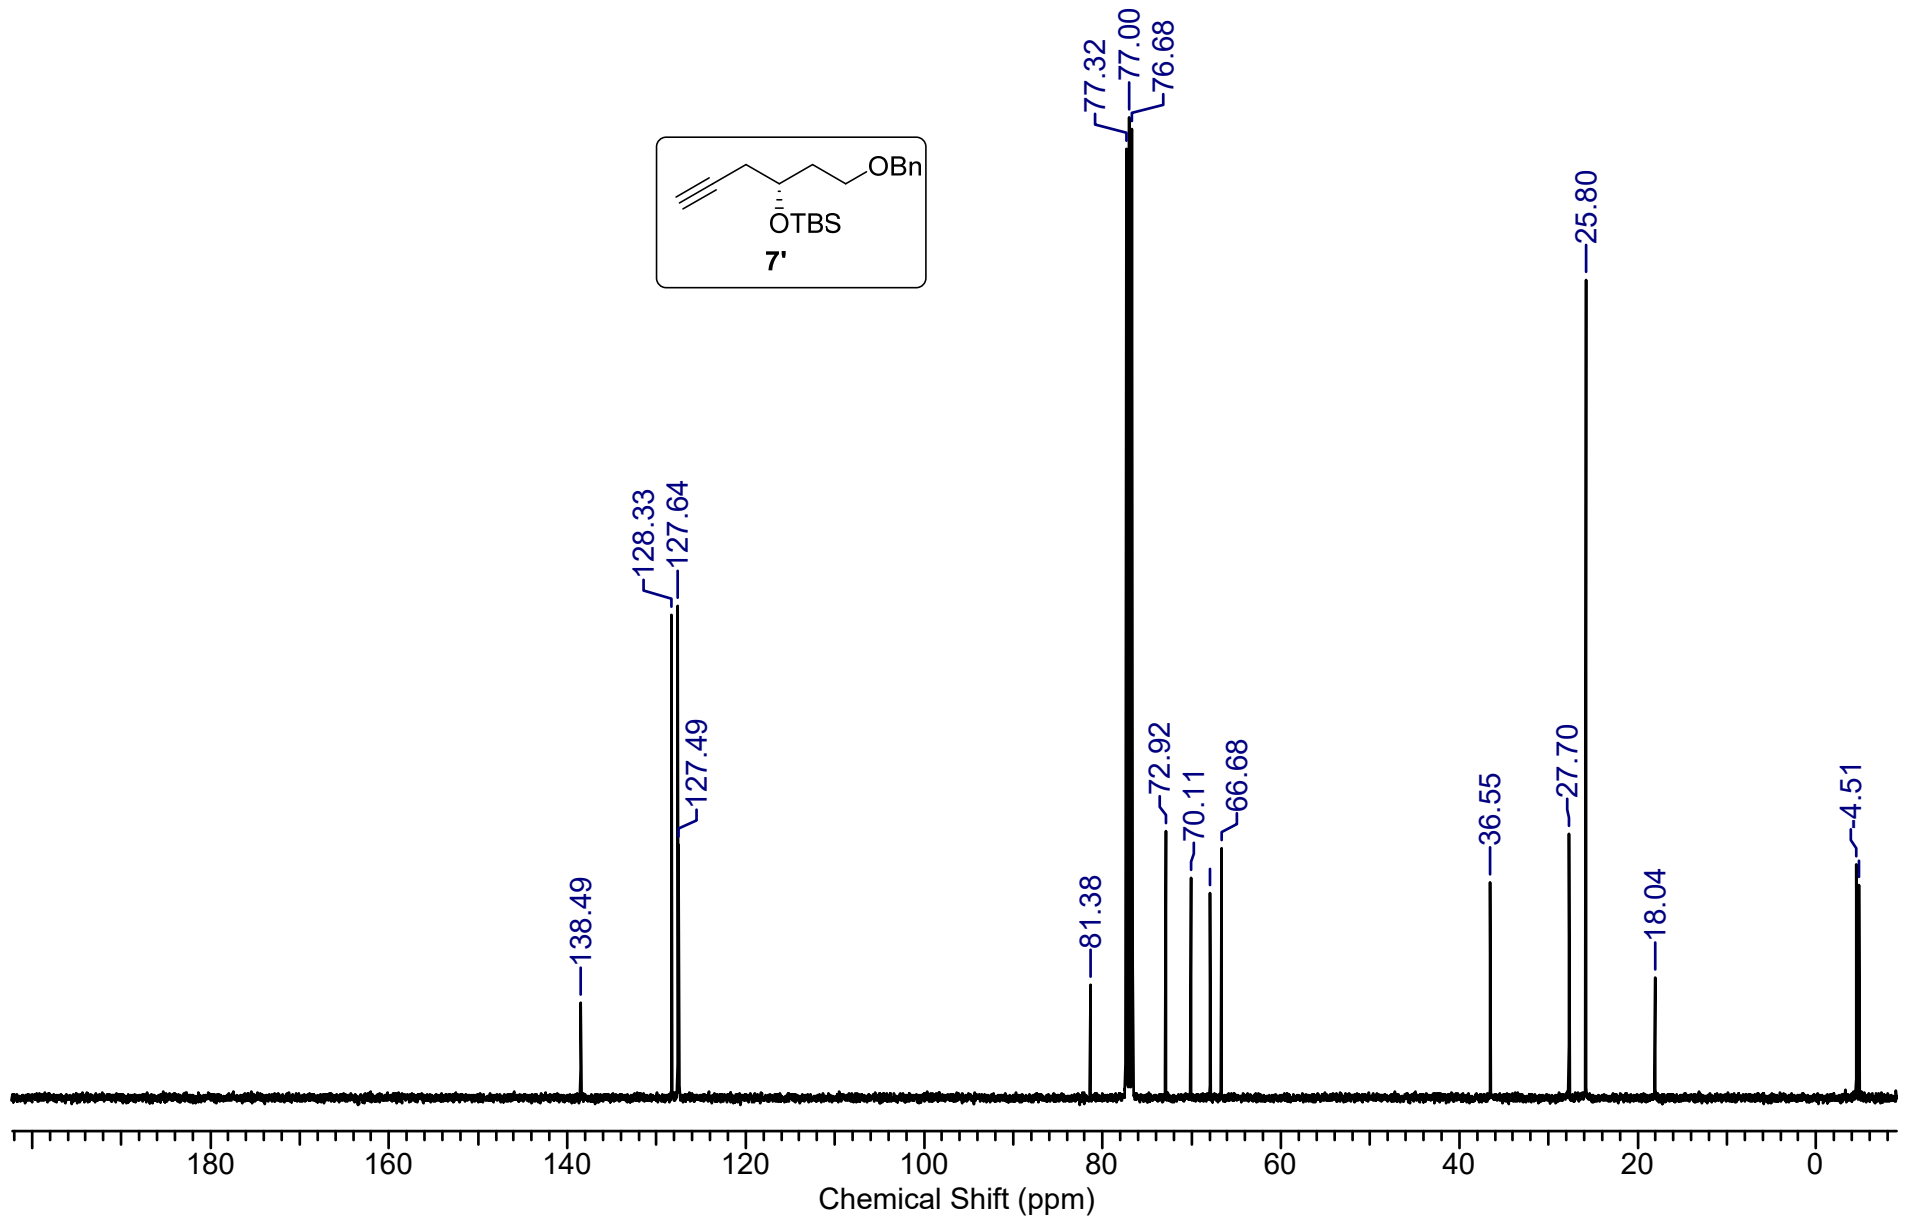

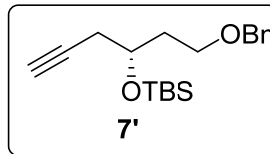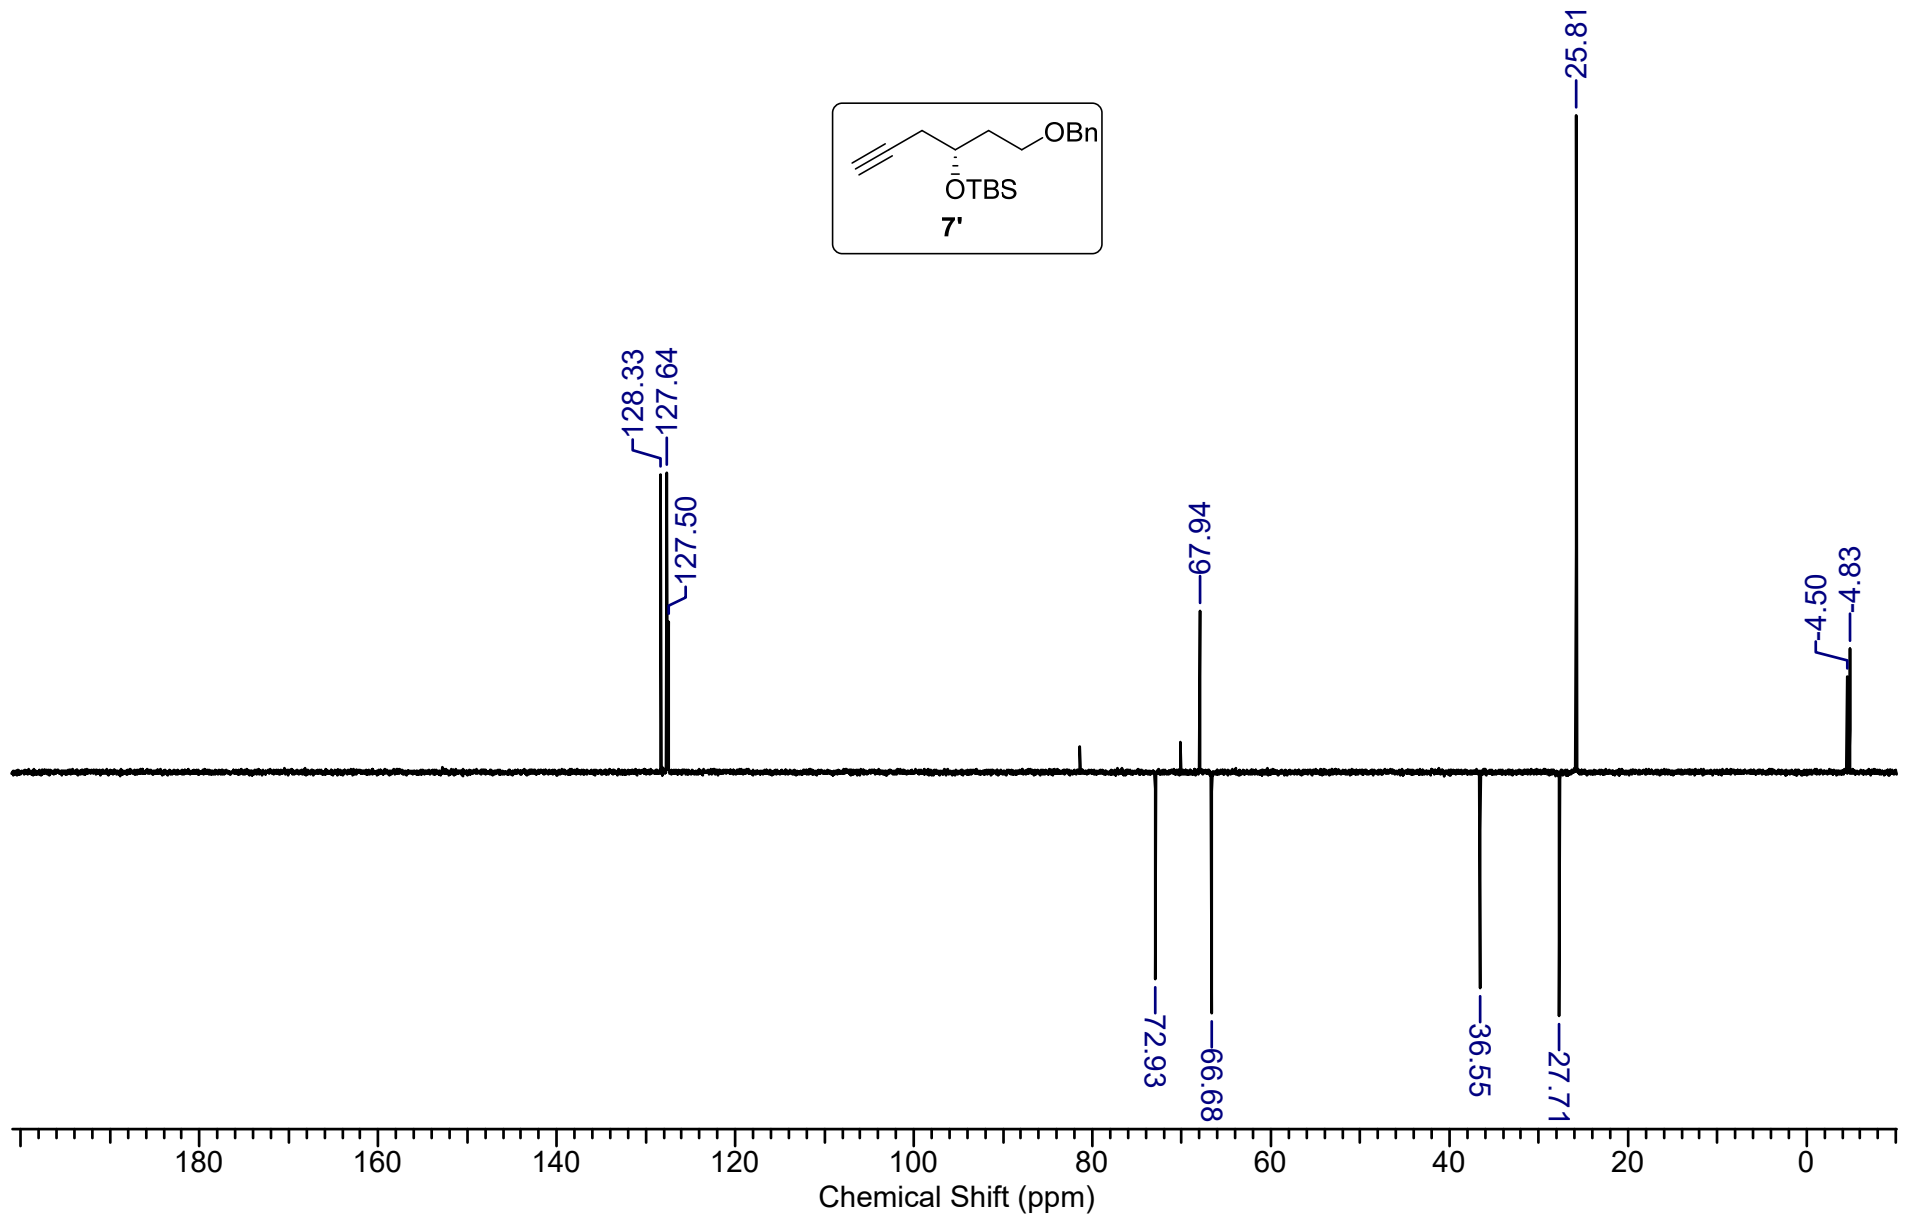

MSH-305 #542 RT: 2.97 AV: 1 NL: 1.37E9  
T: FTMS + p ESI Full ms [100.0000-1500.0000]

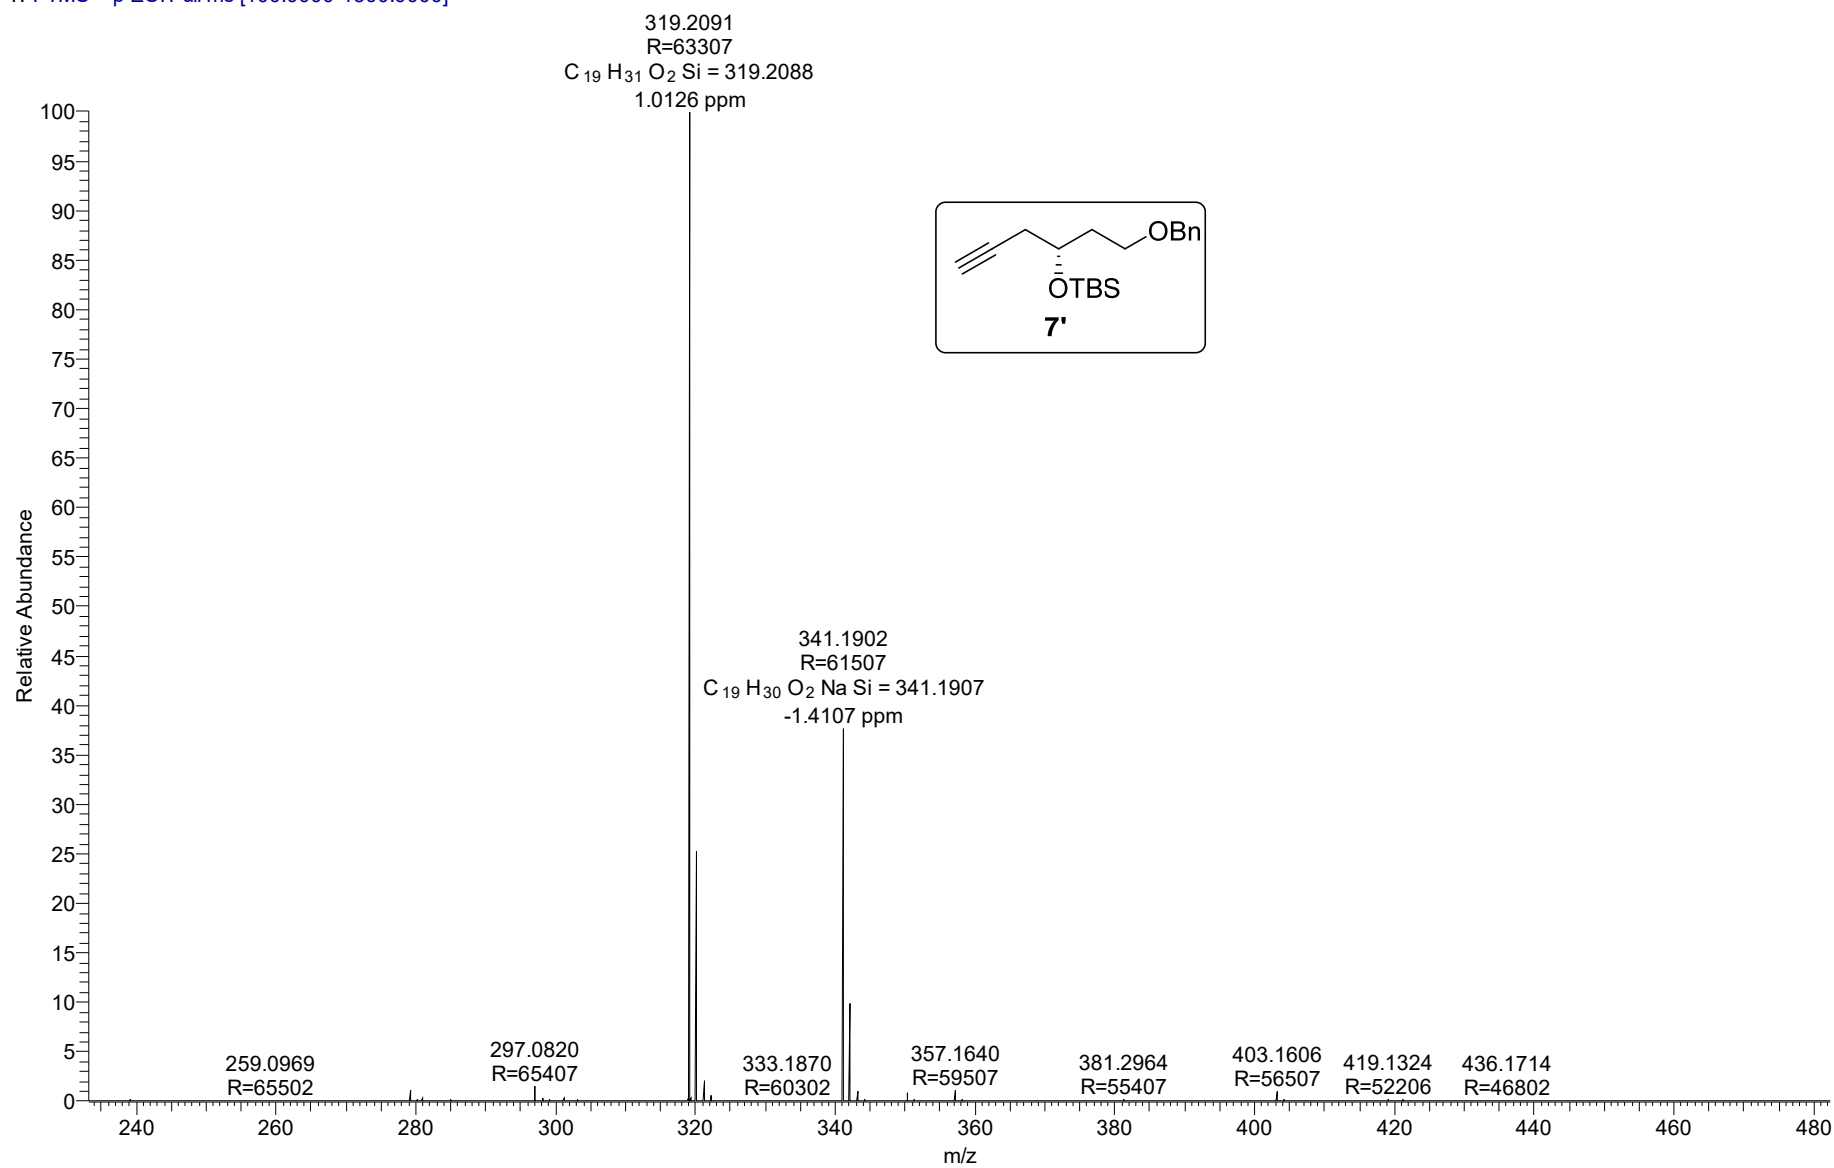

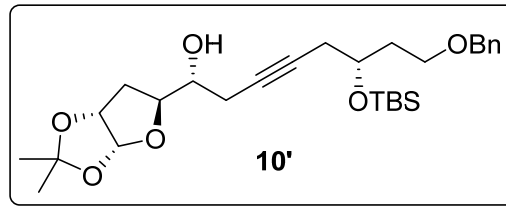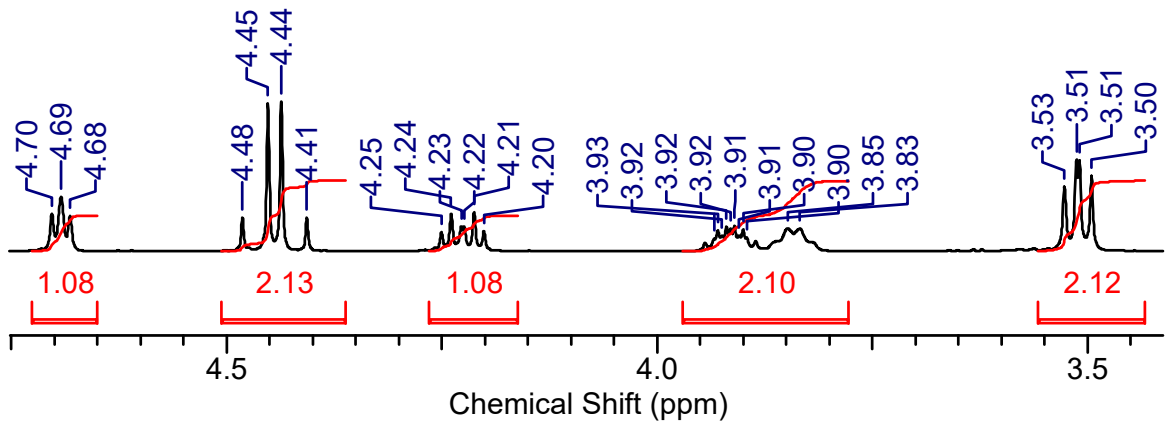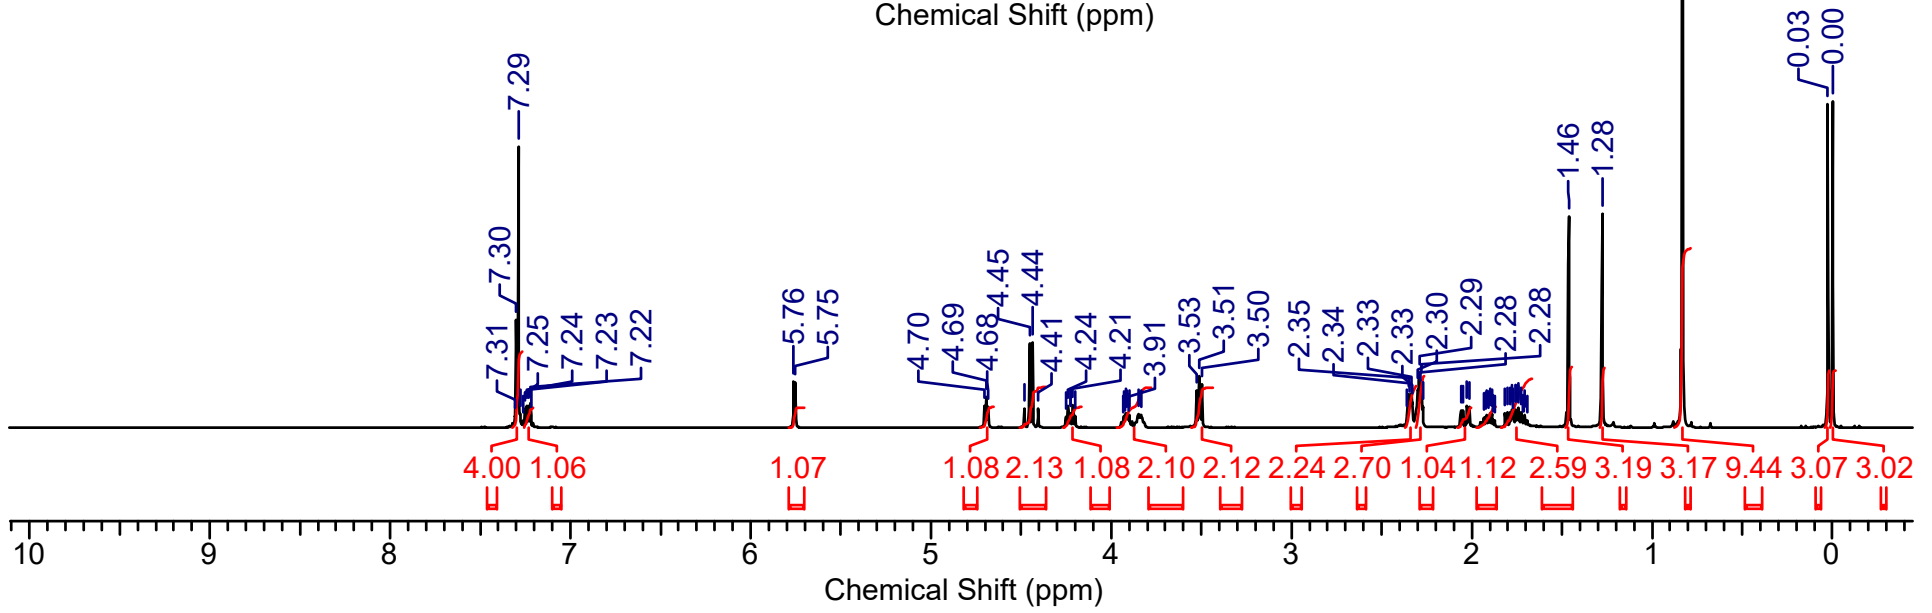

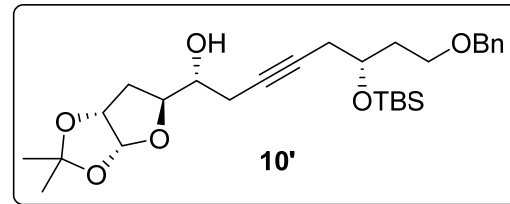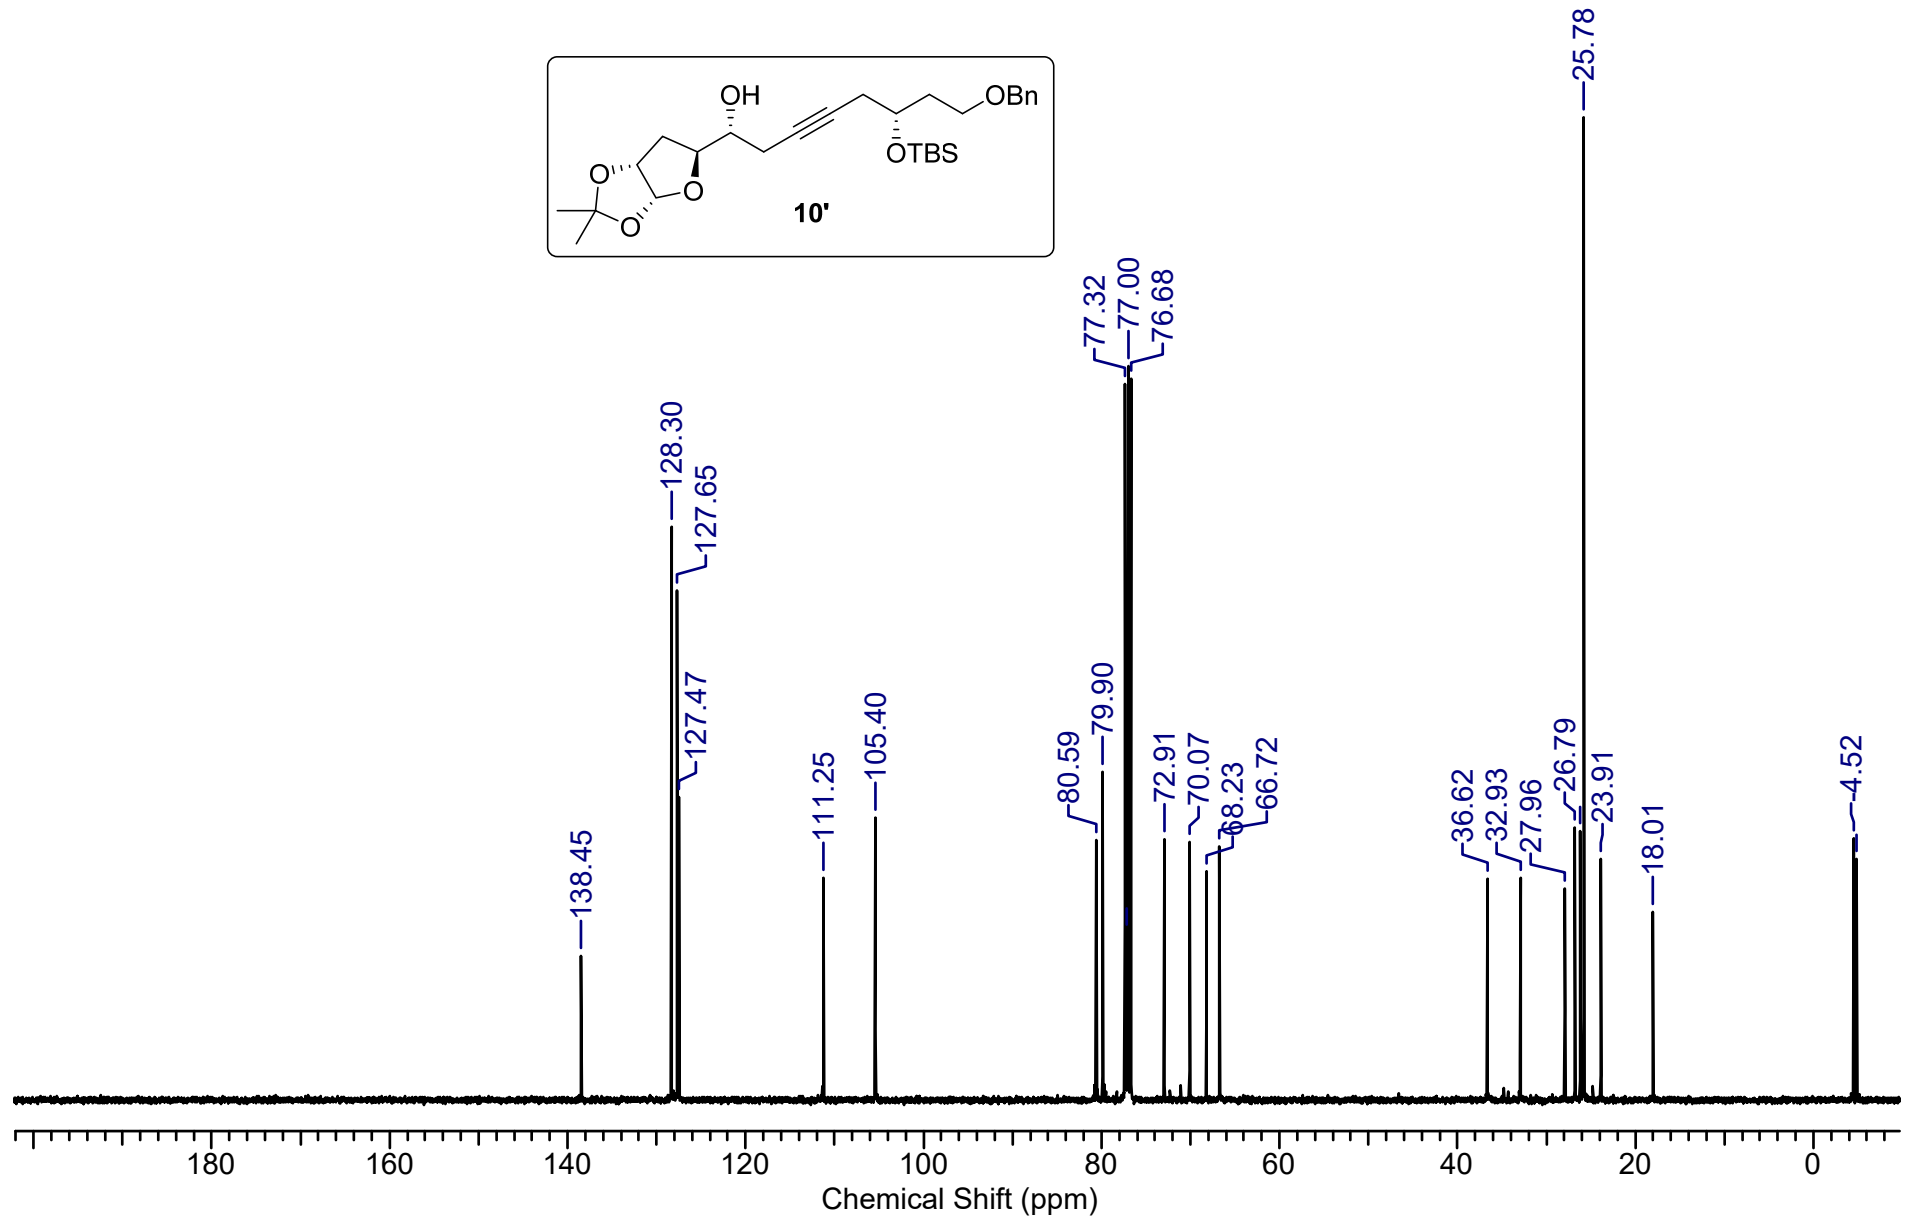



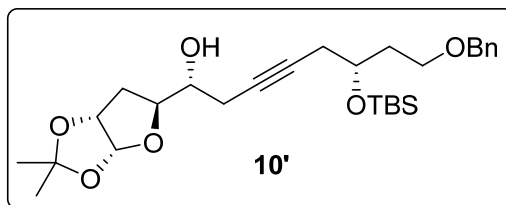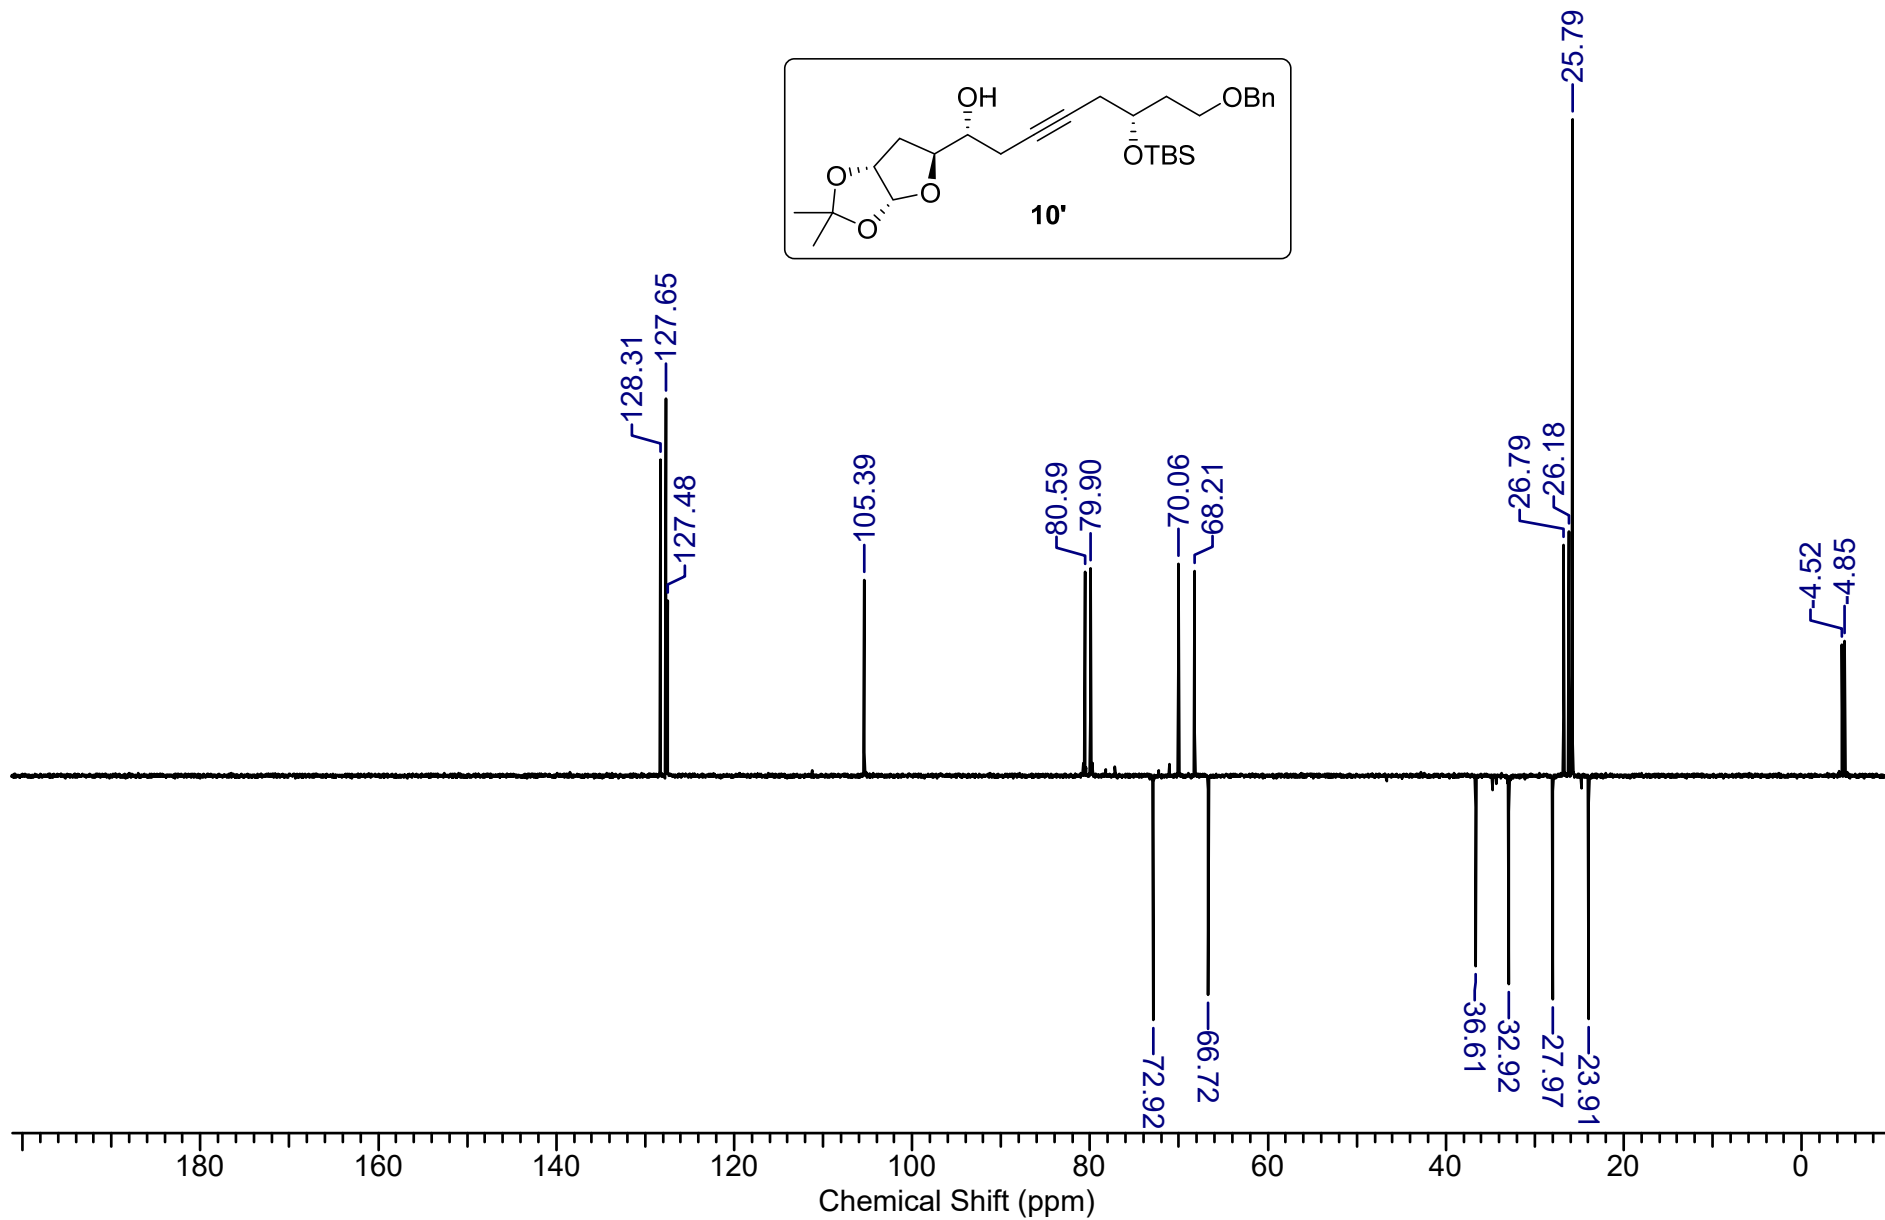

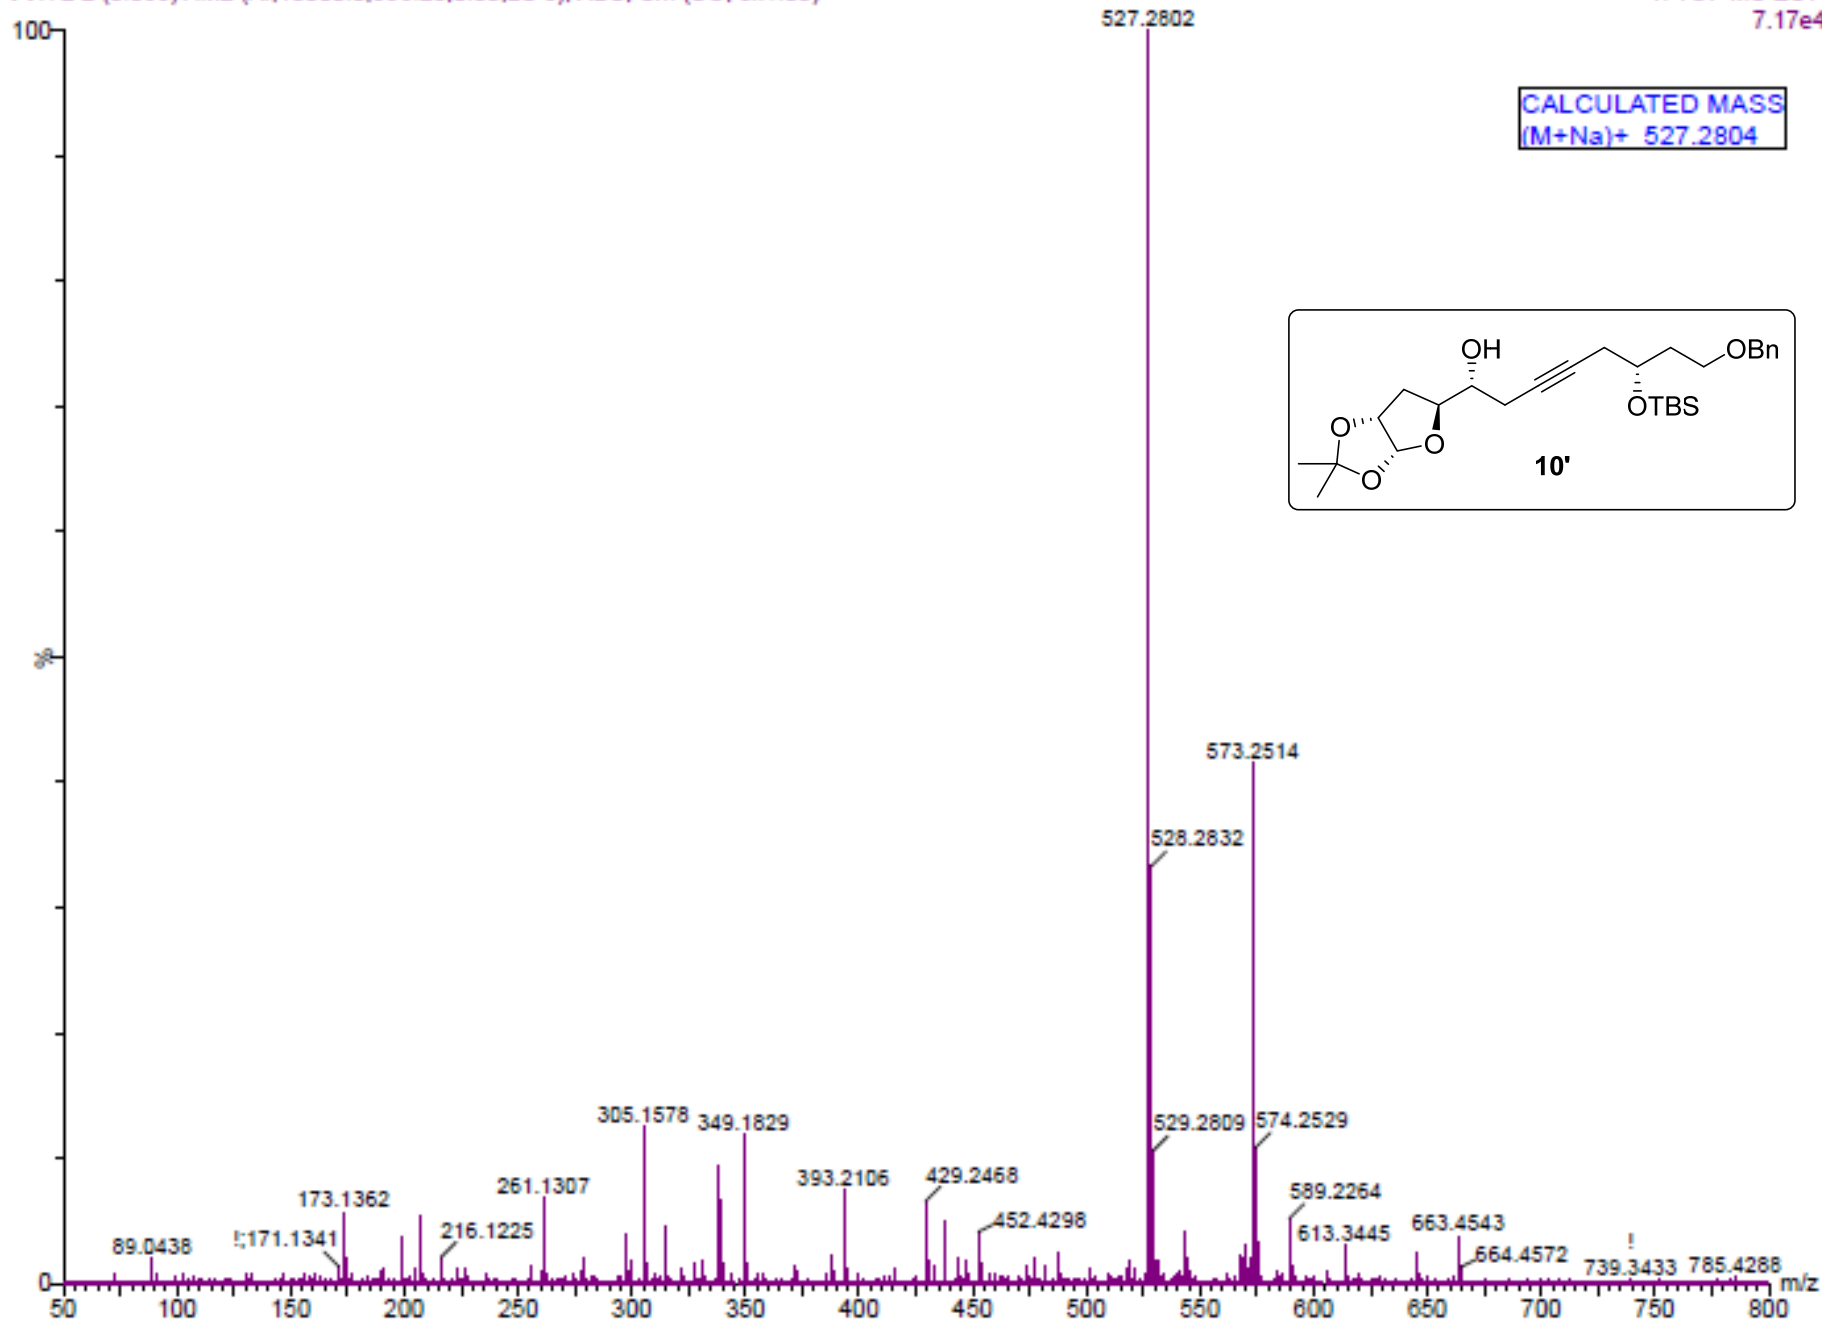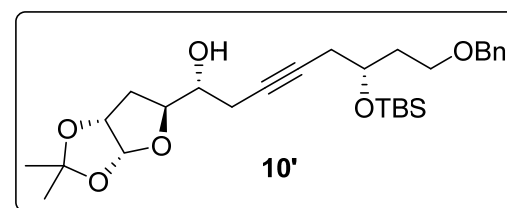

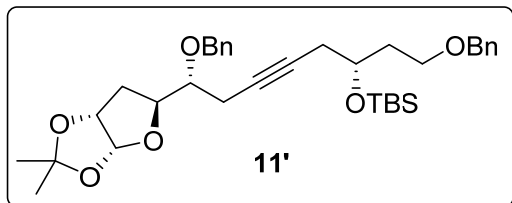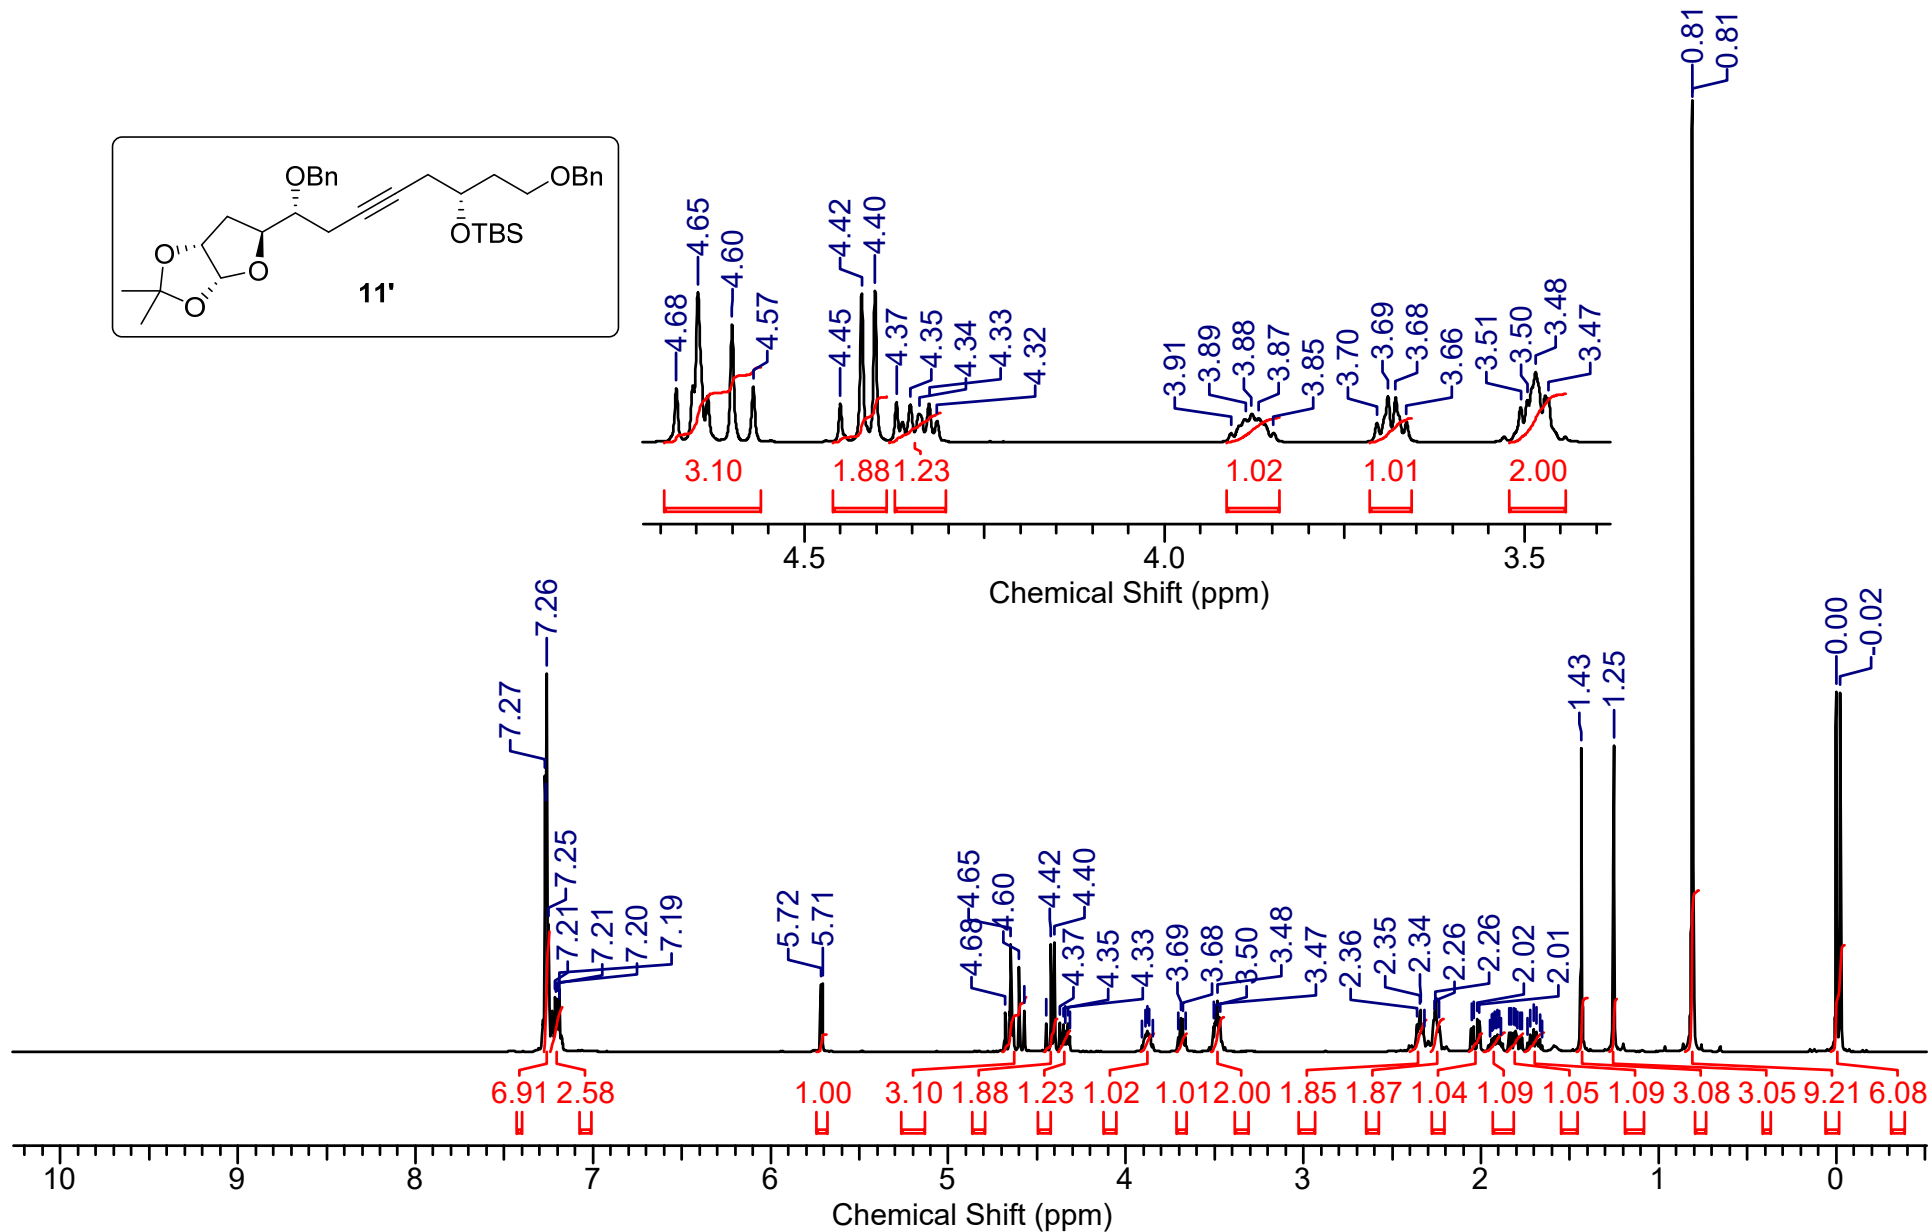

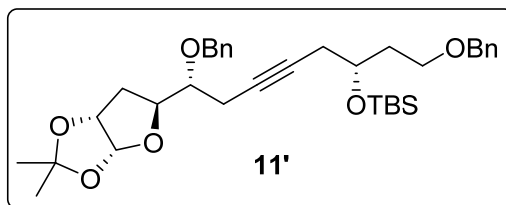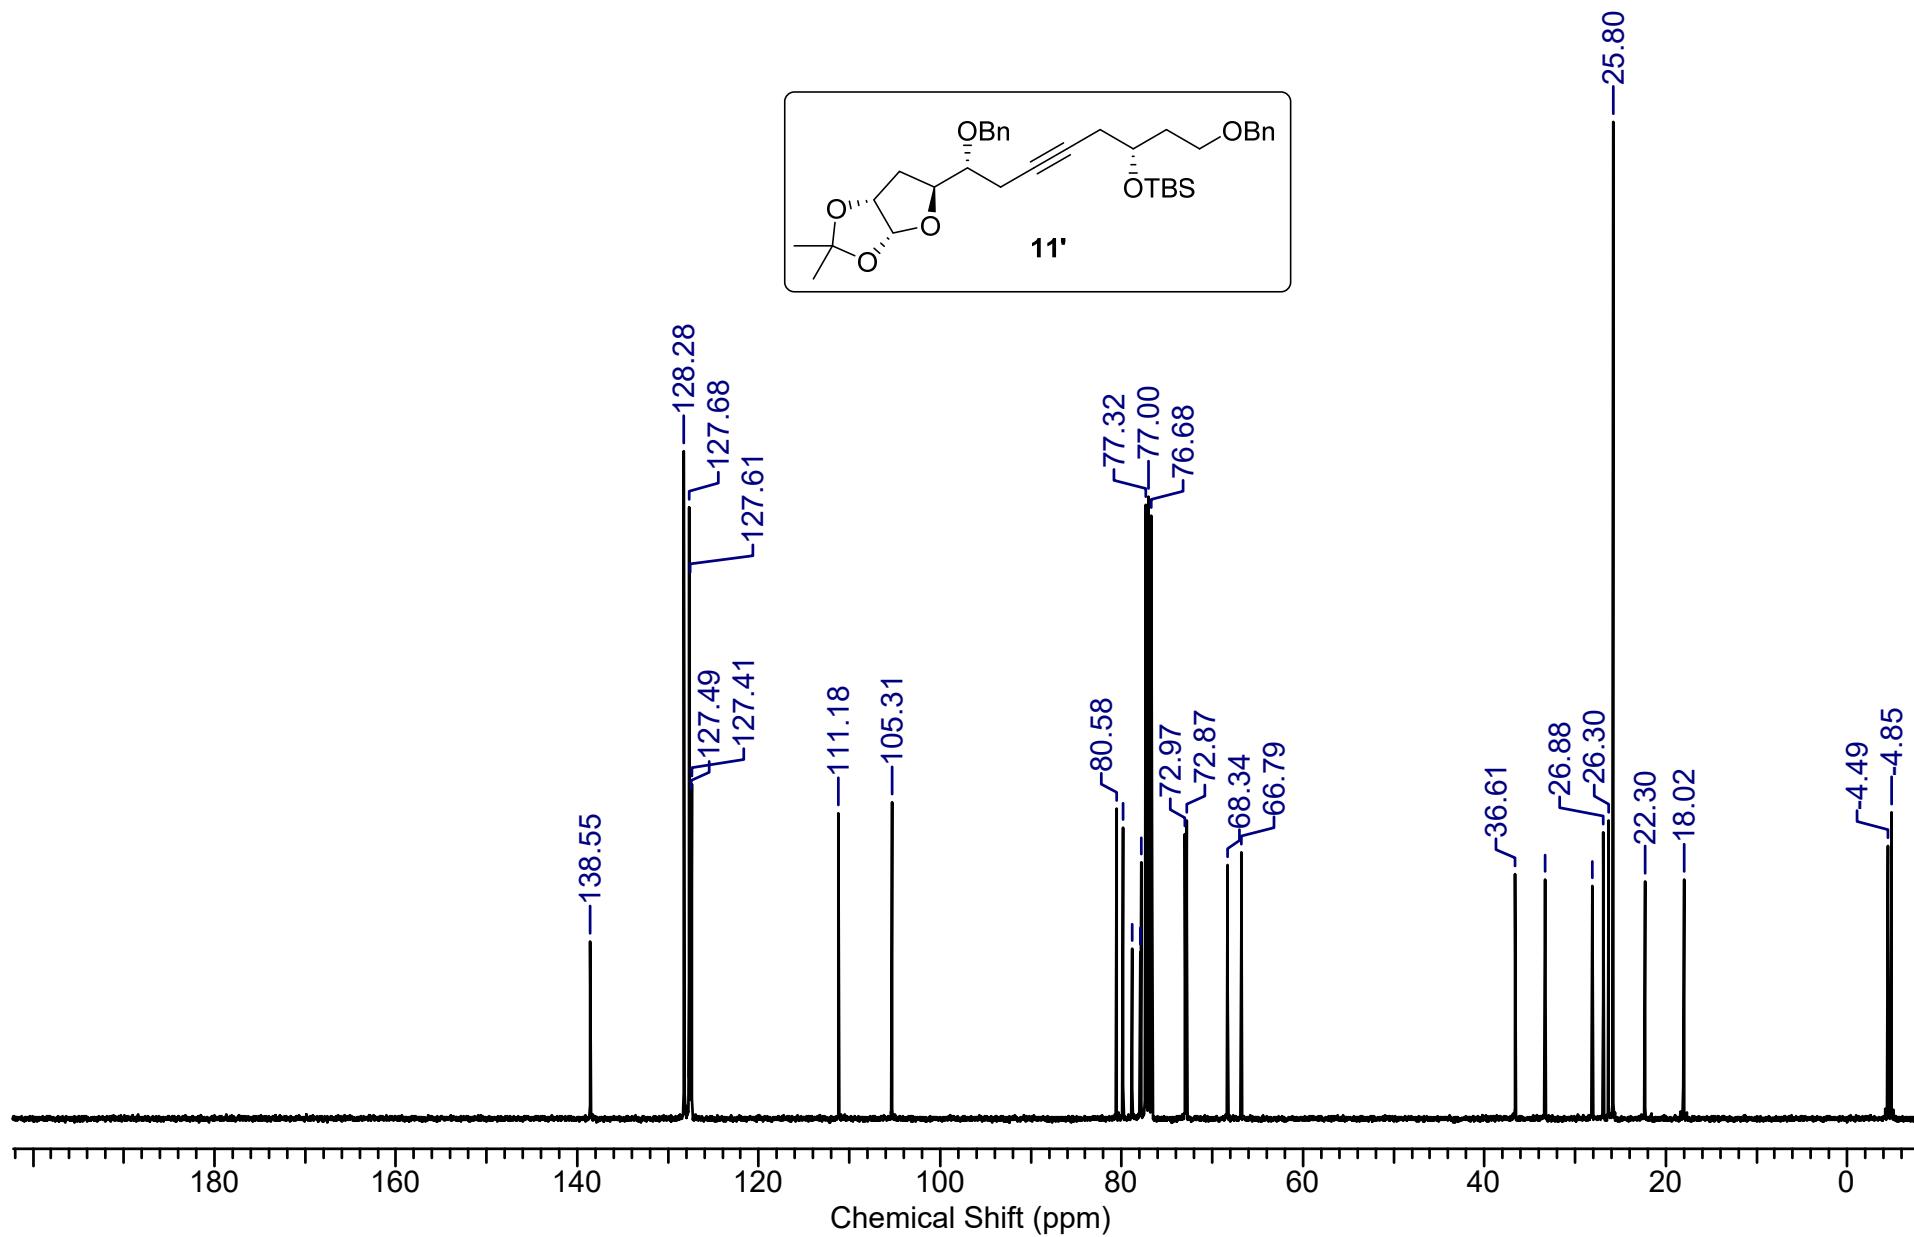

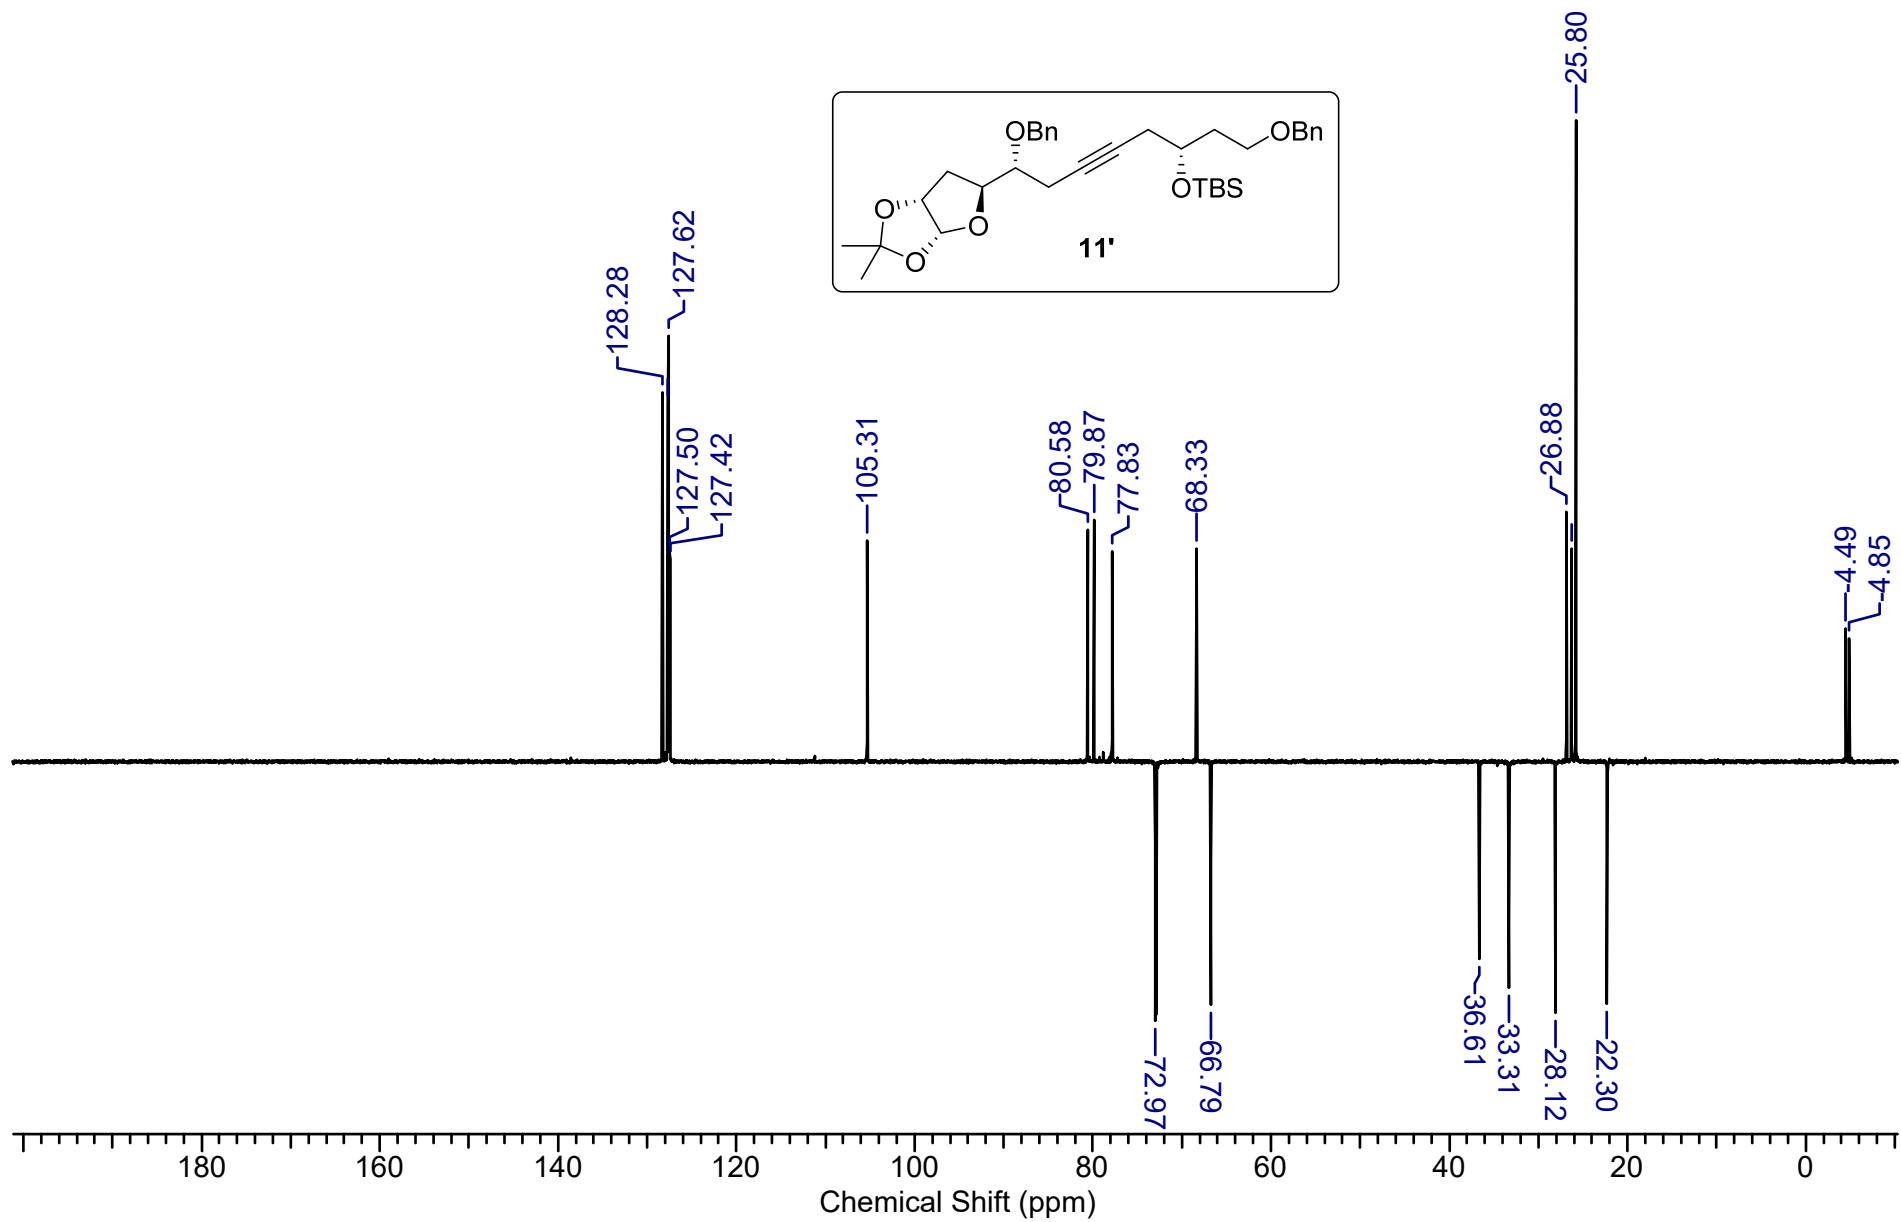

VVK 3 1 (0.052) AM2 (Ar,10000.0,556.28,0.00,LS 3); ABS; Sm (SG, 3x1.00)

1: TOF MS ES+  
7.15e4

CALCULATED MASS  
(M+Na)+ 617.3274

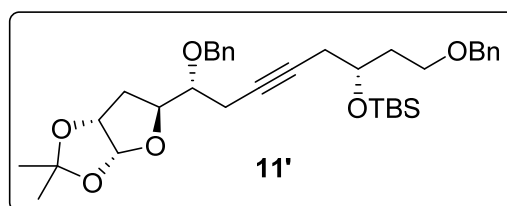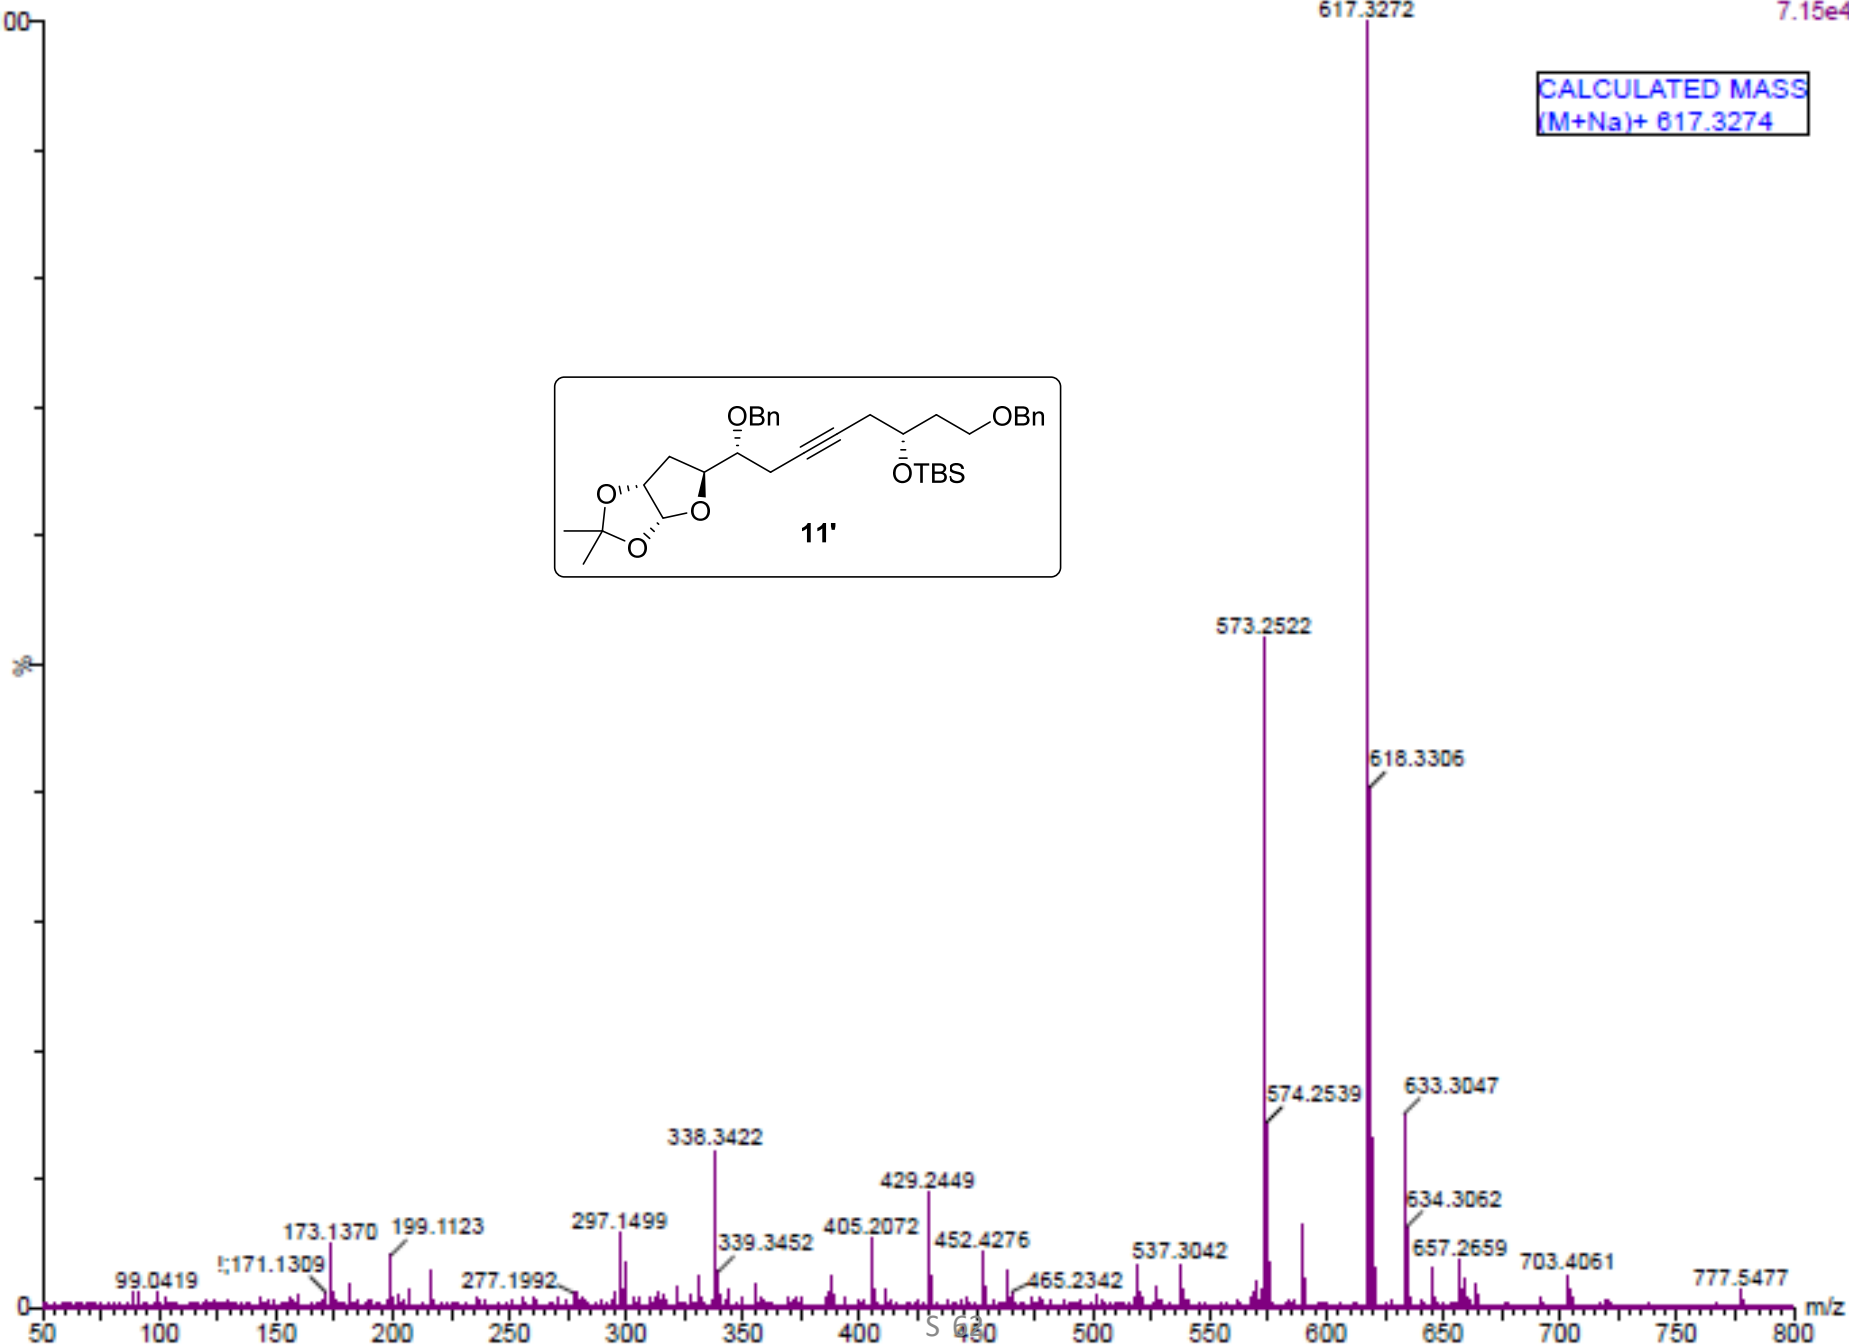

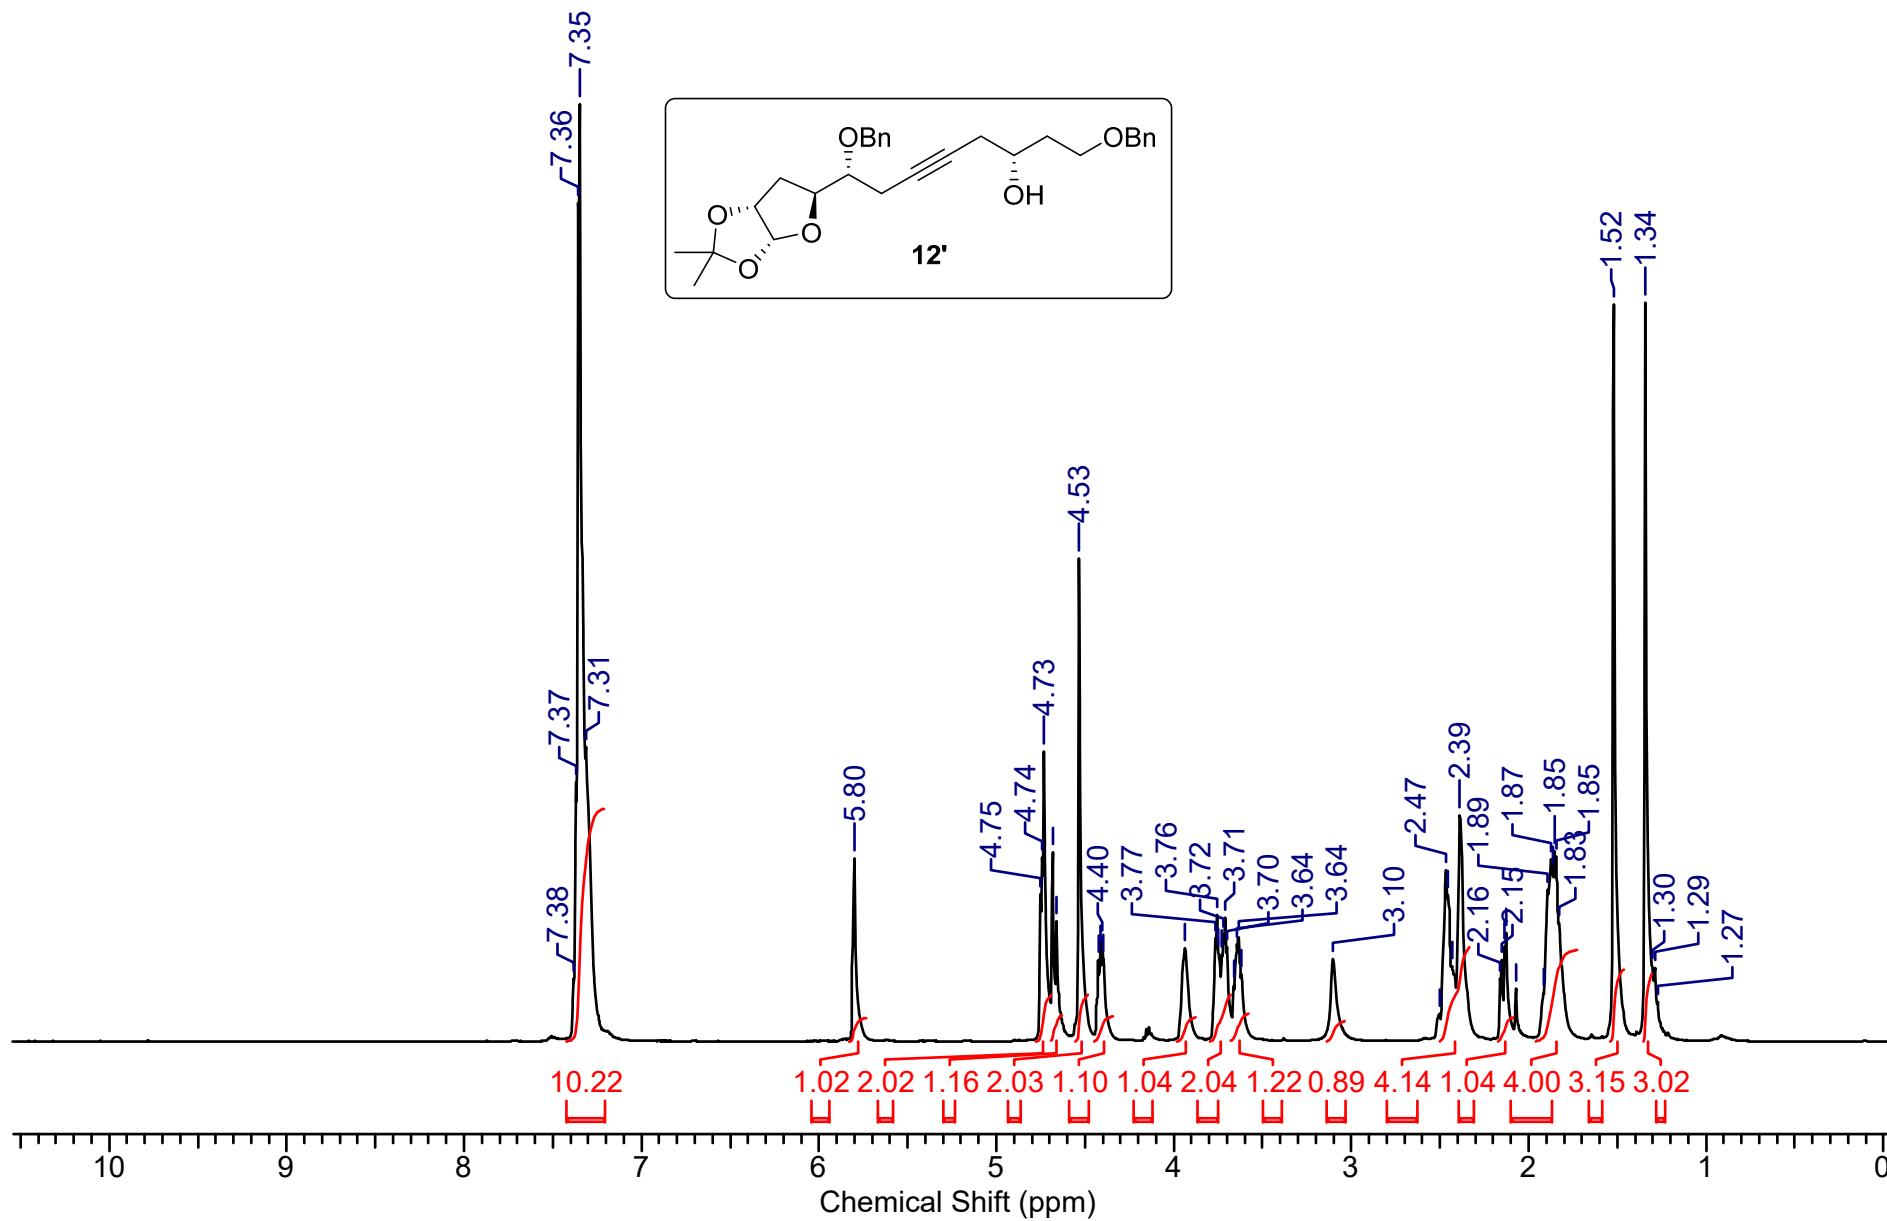

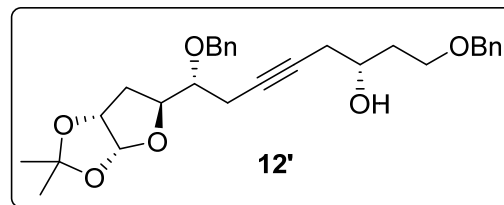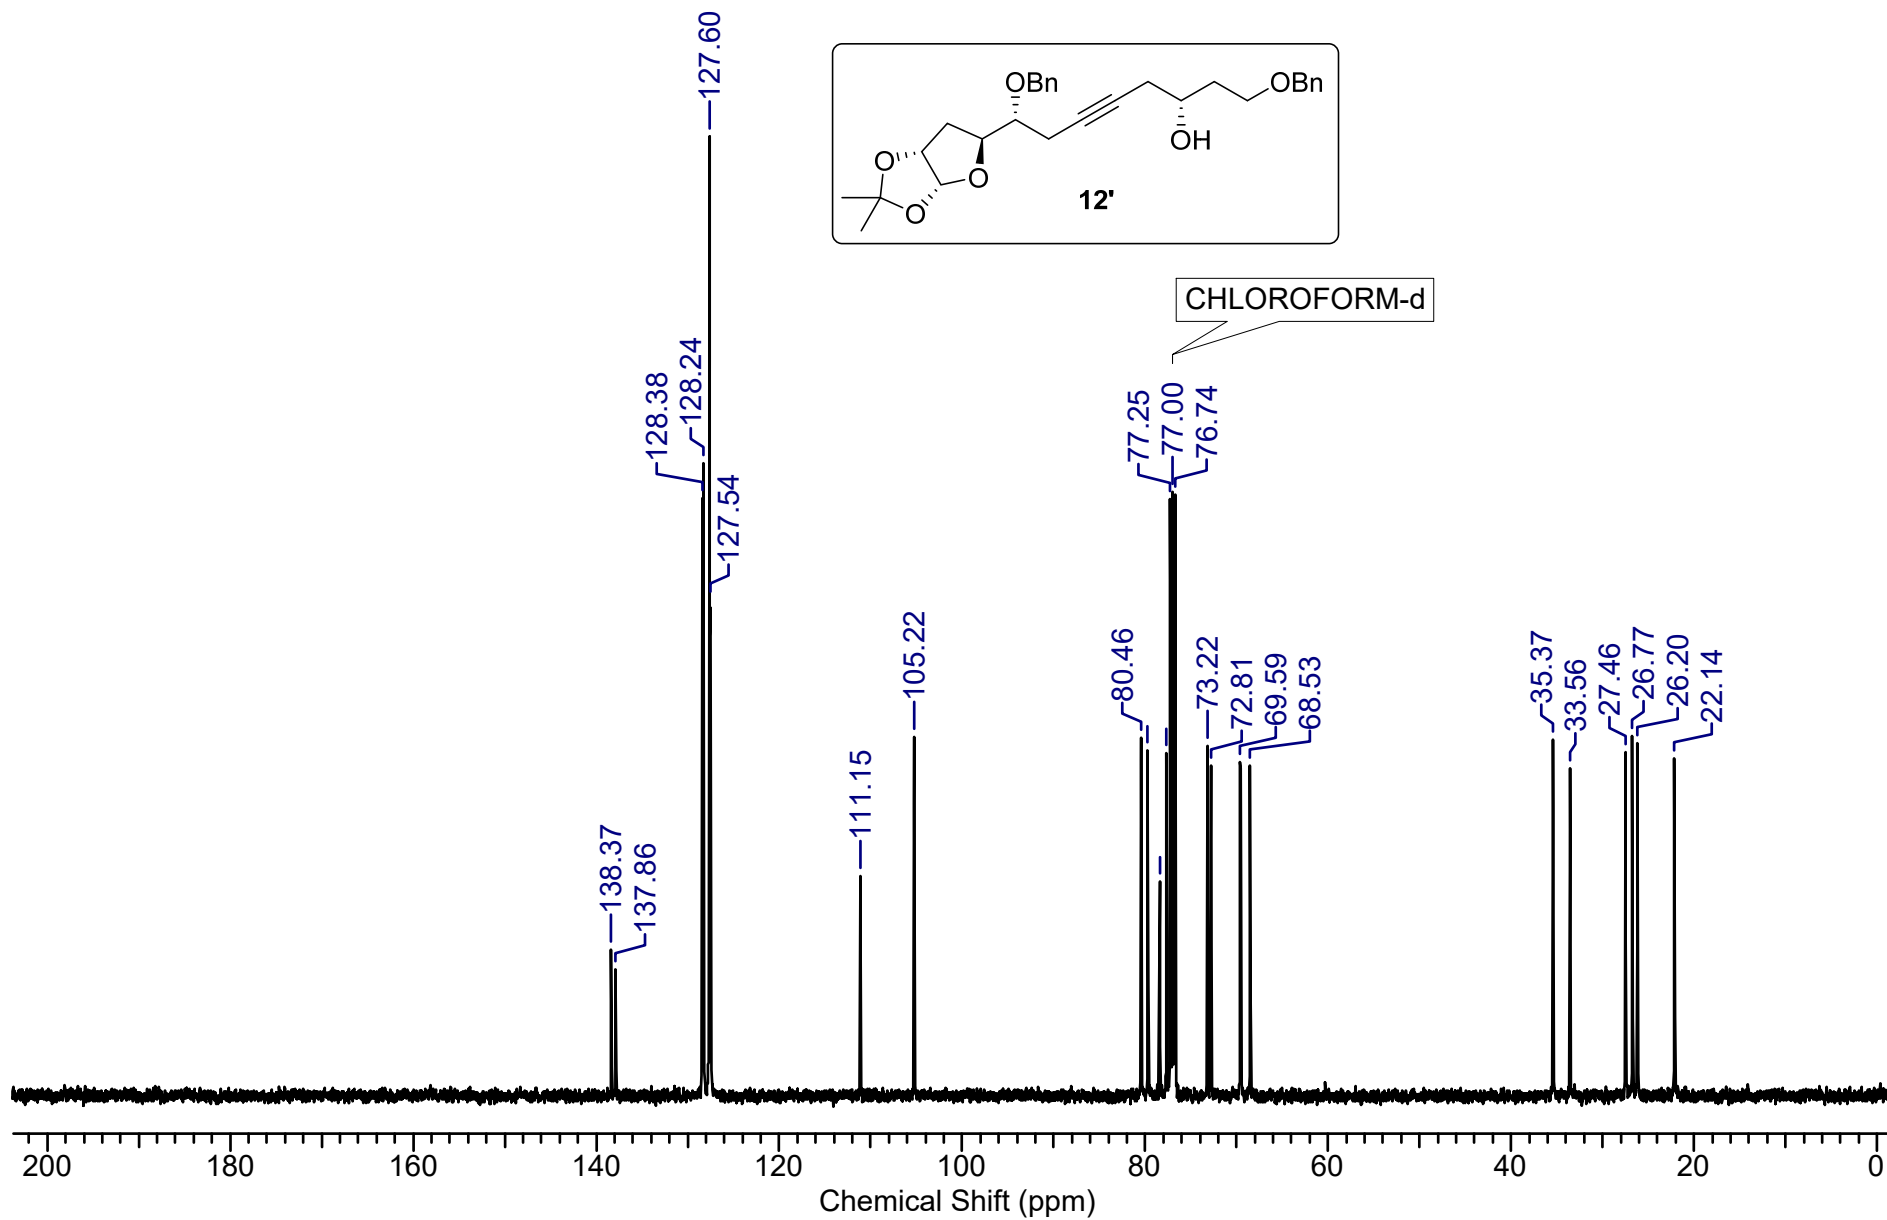



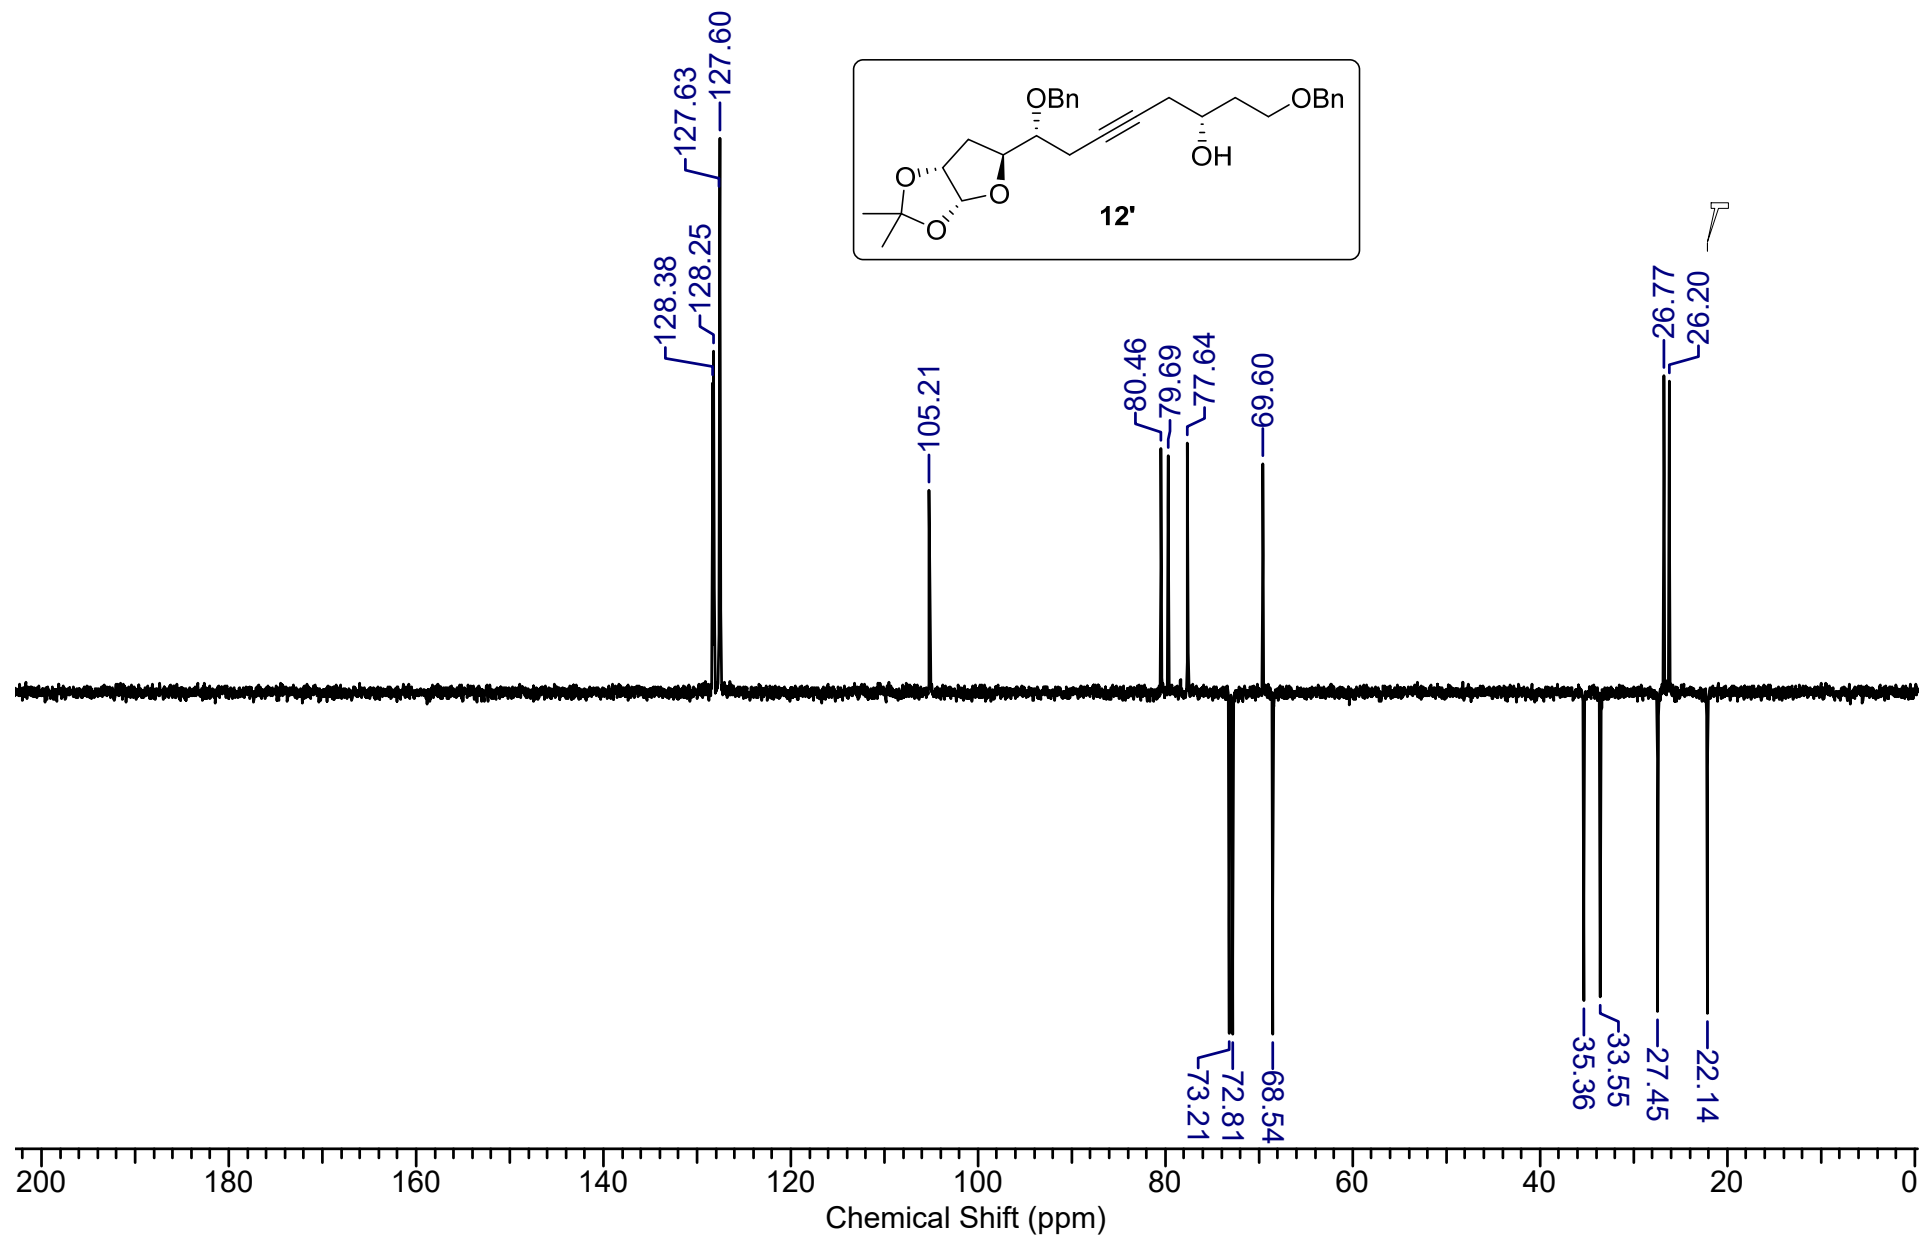

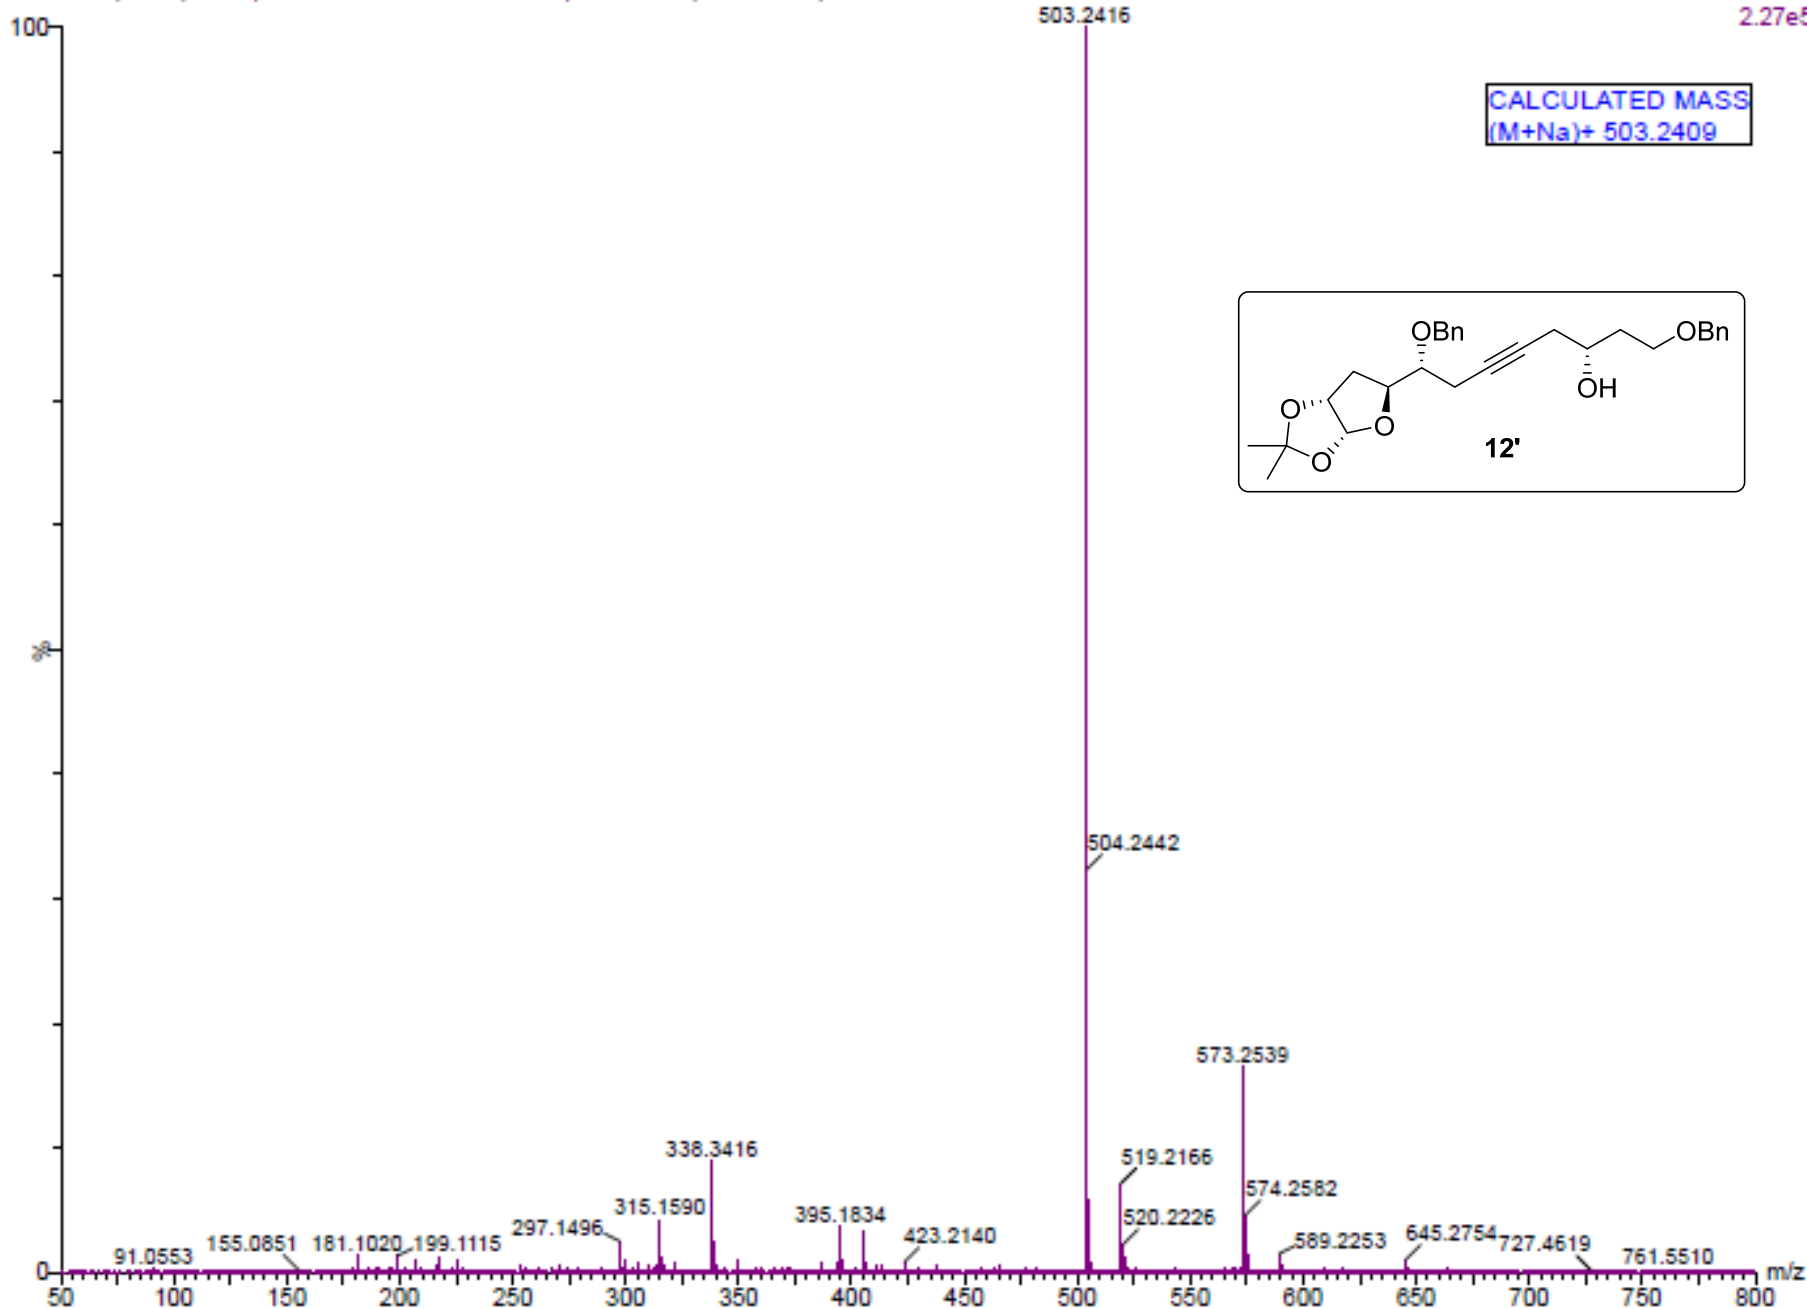

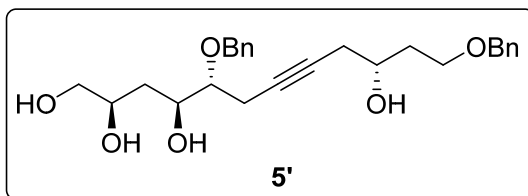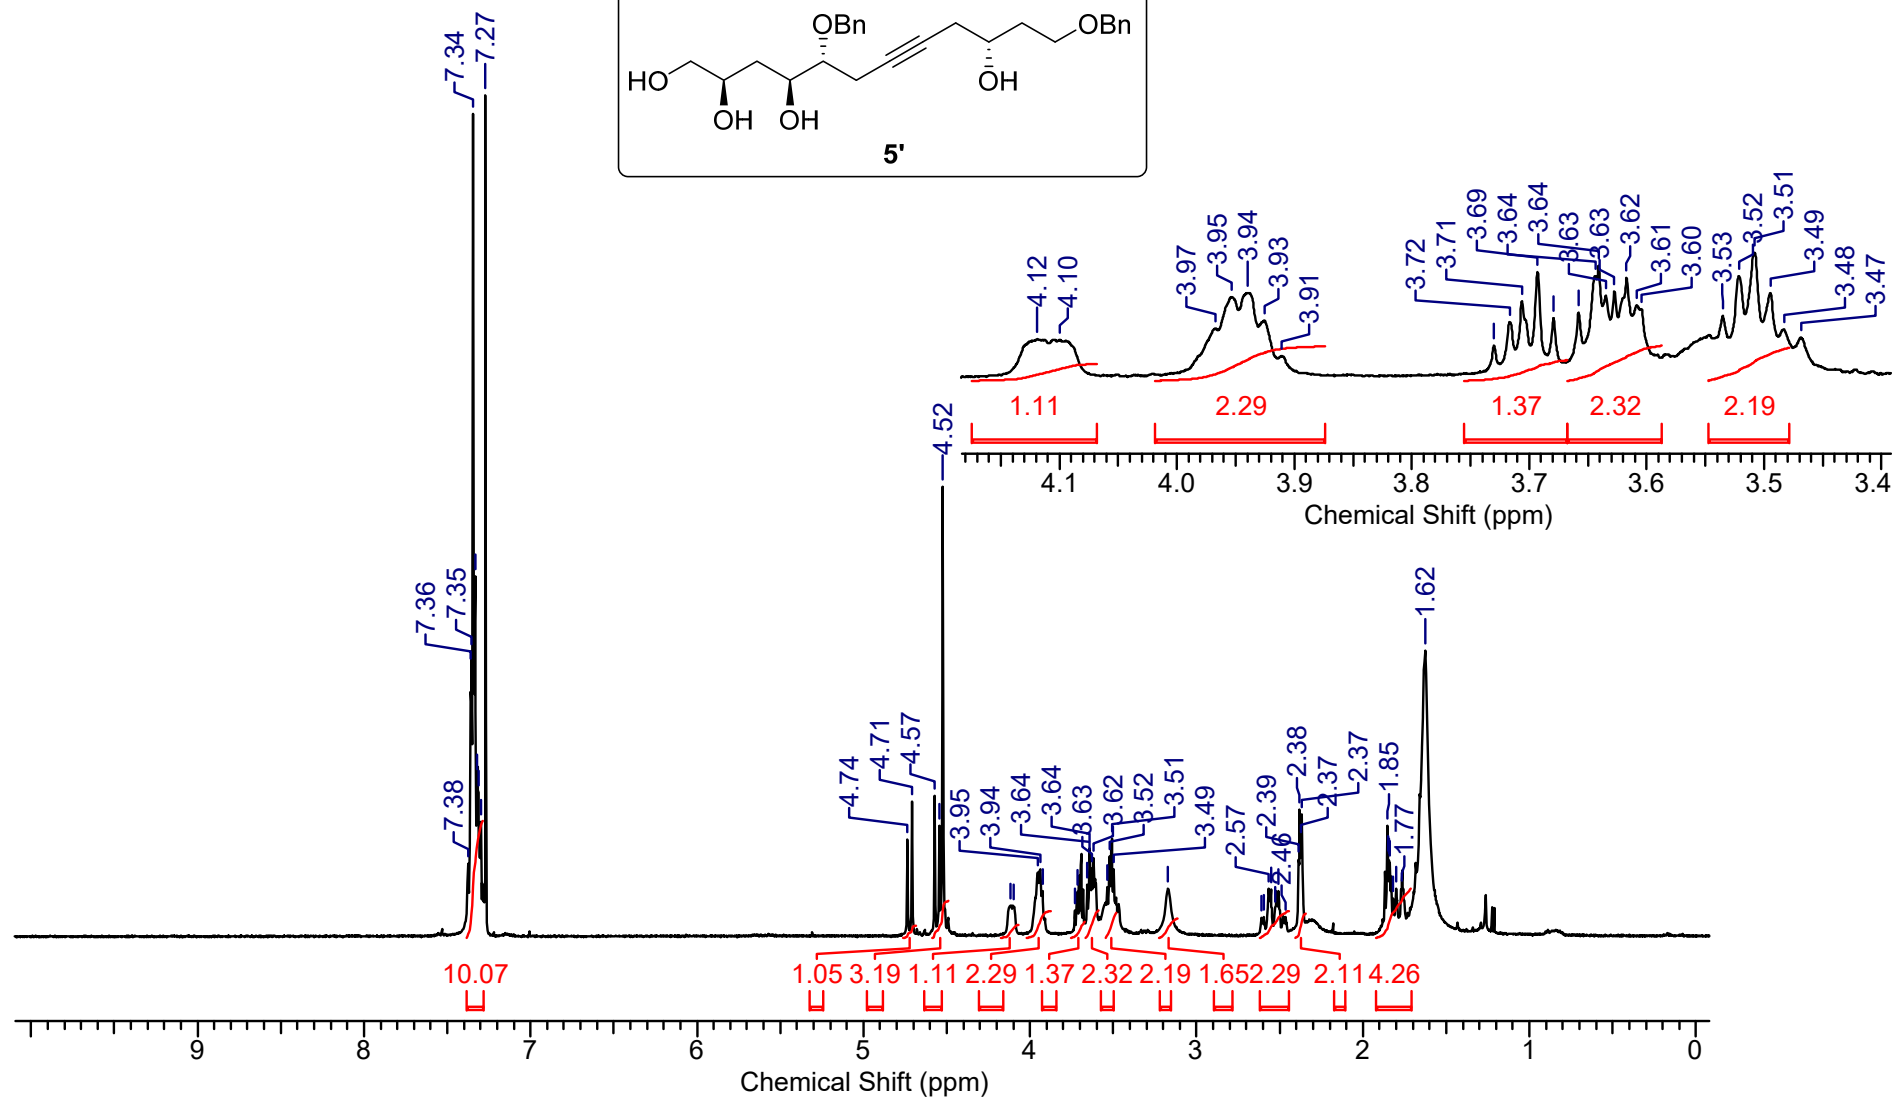

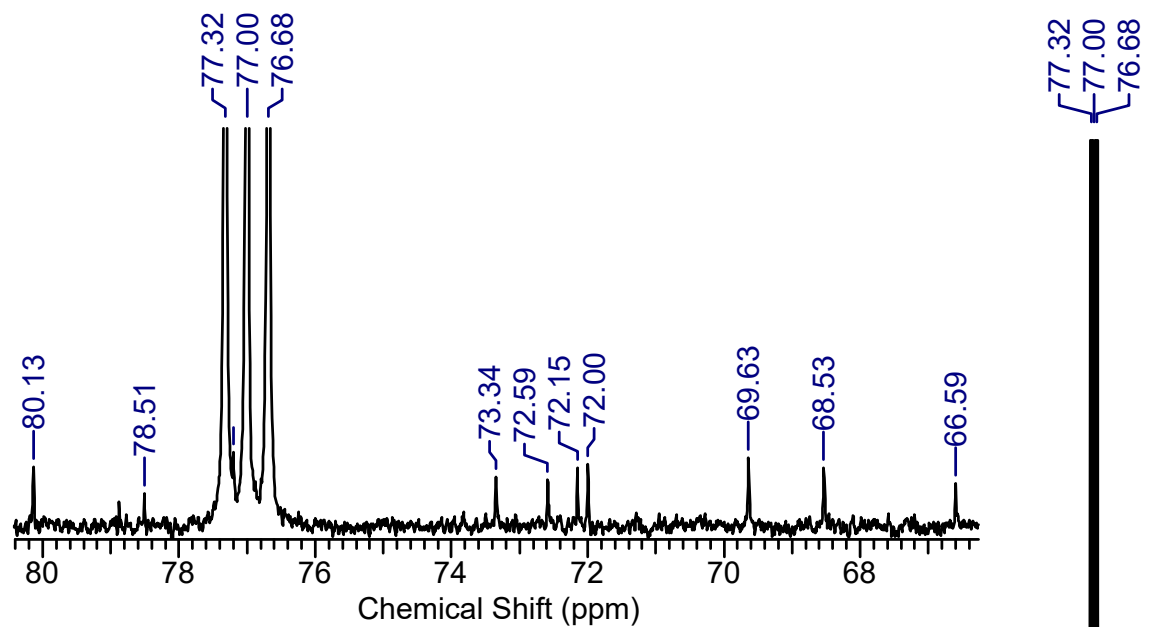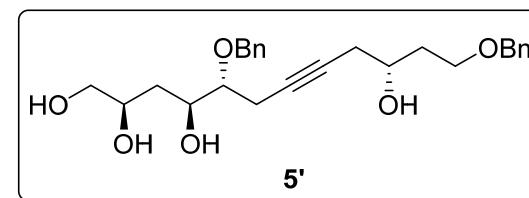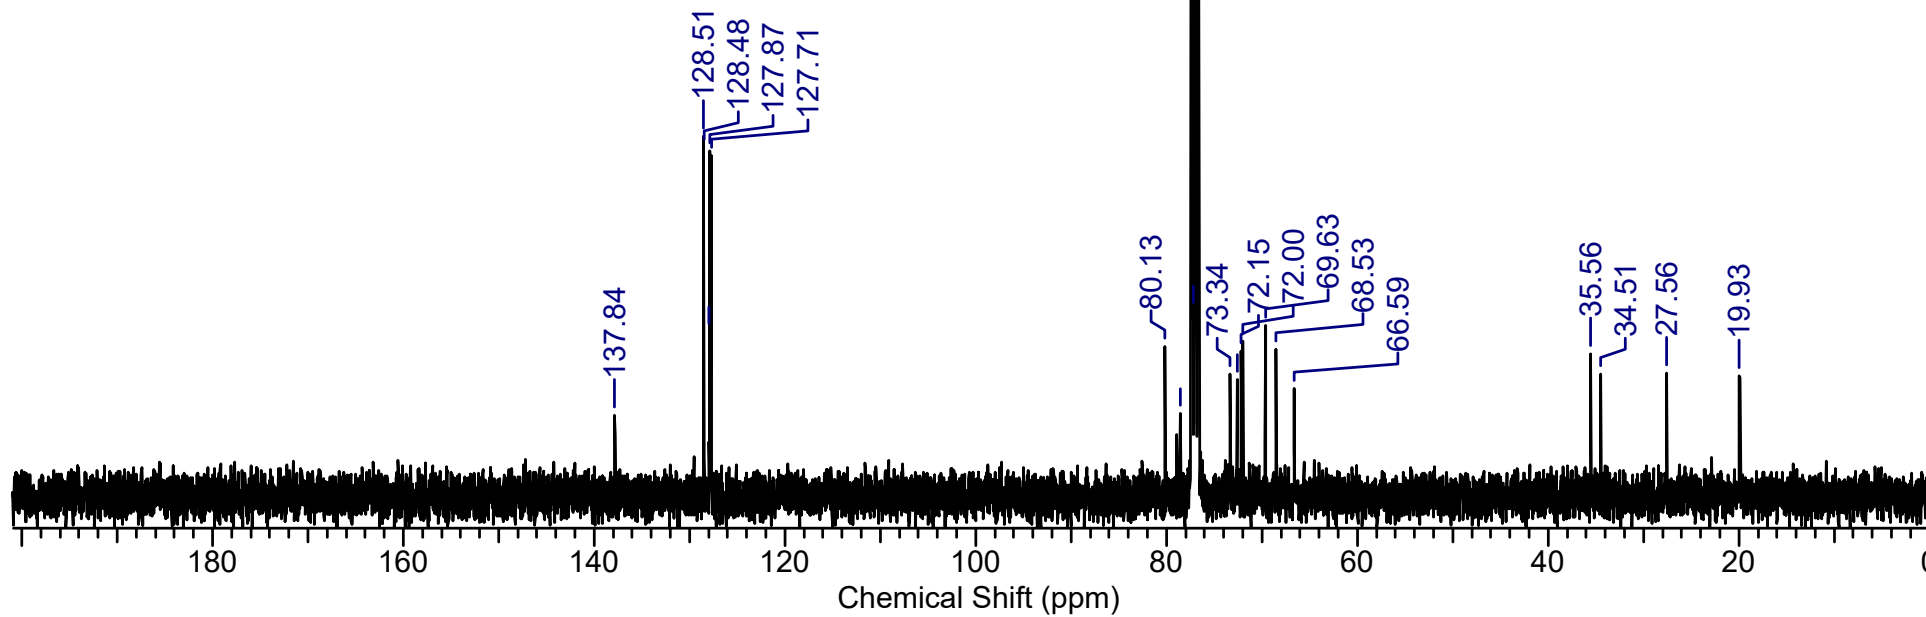

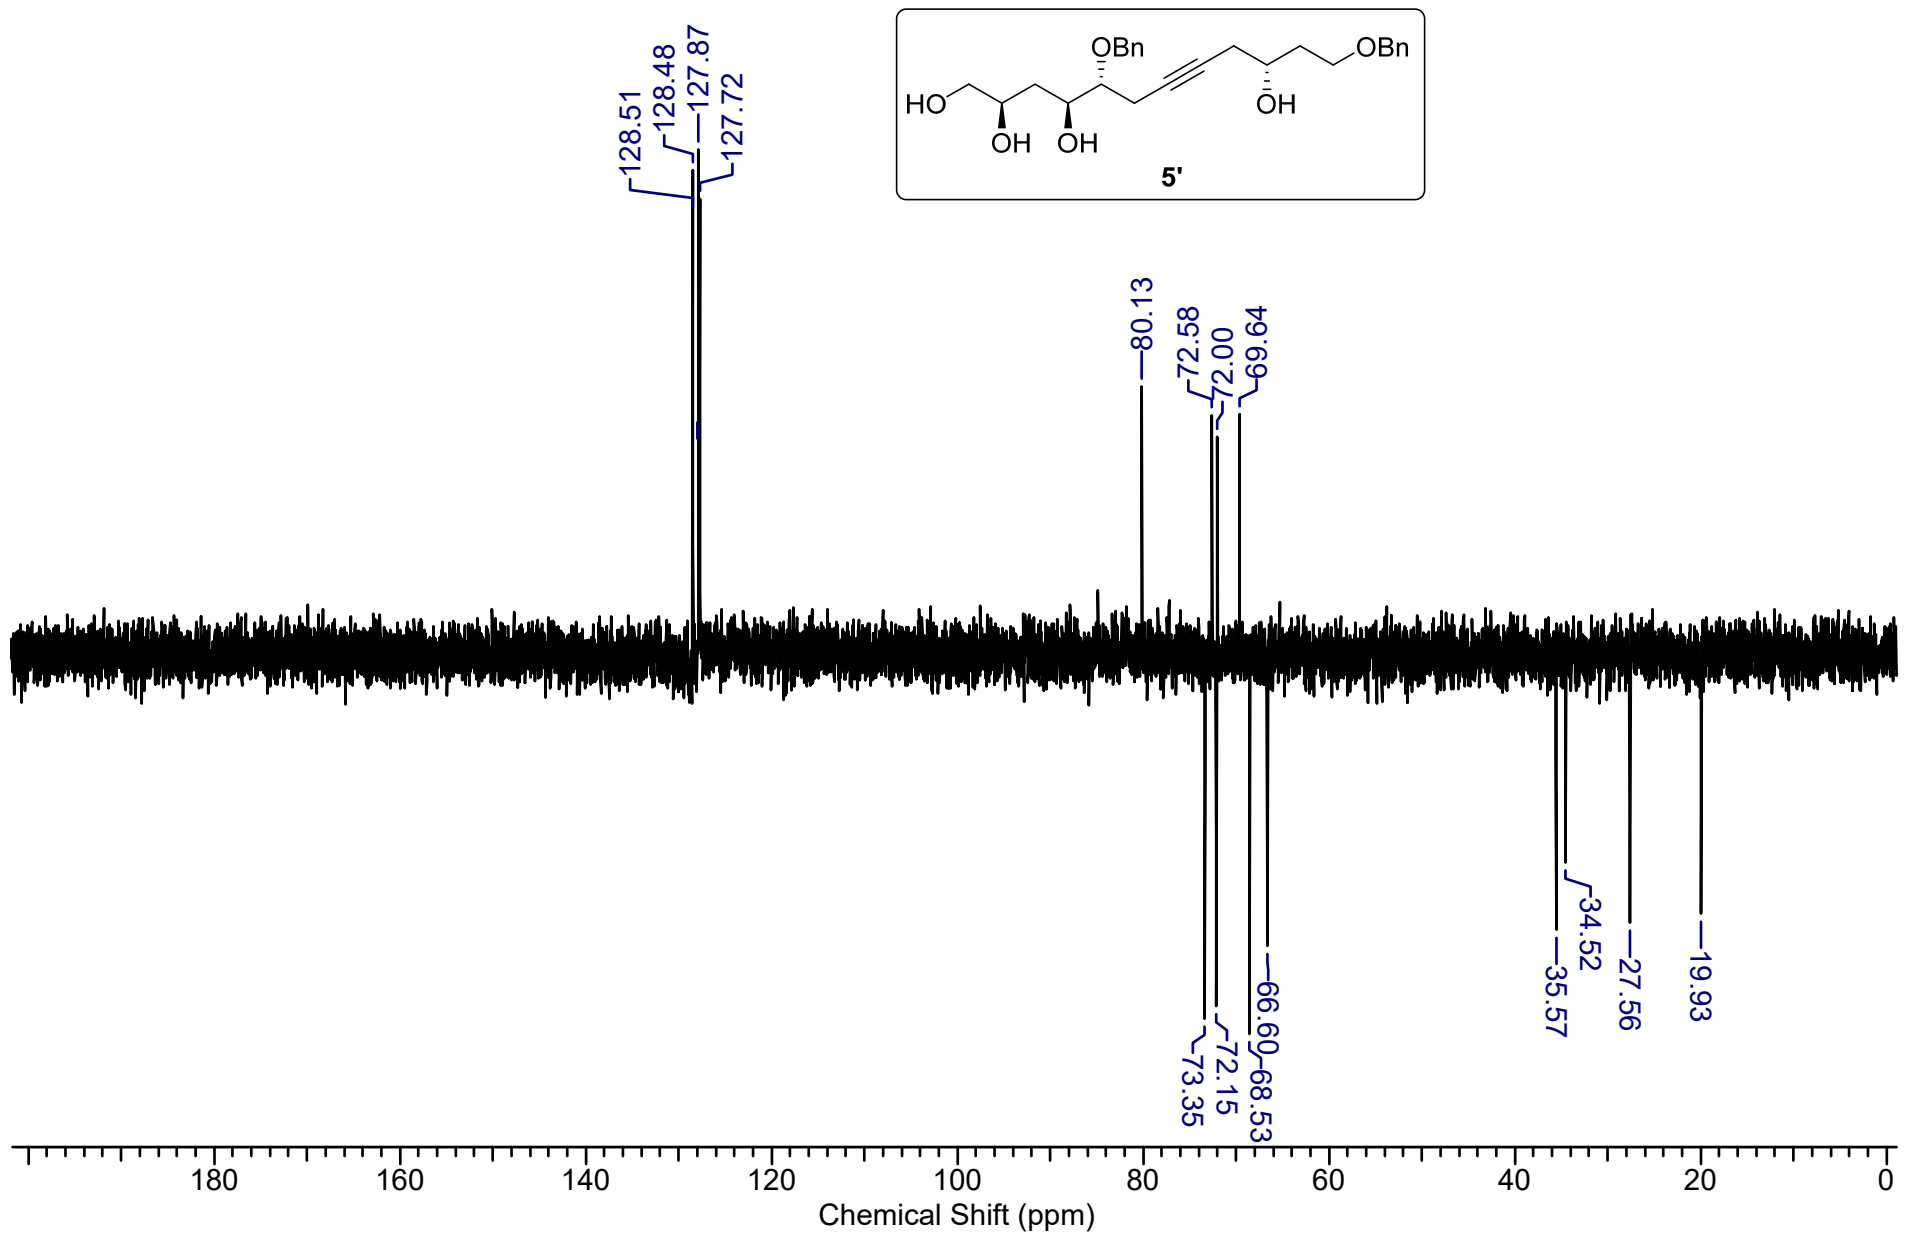

CALCULATED MASS  
(M+H)+ 443.2433

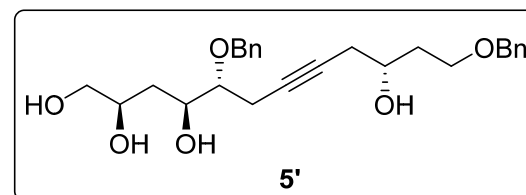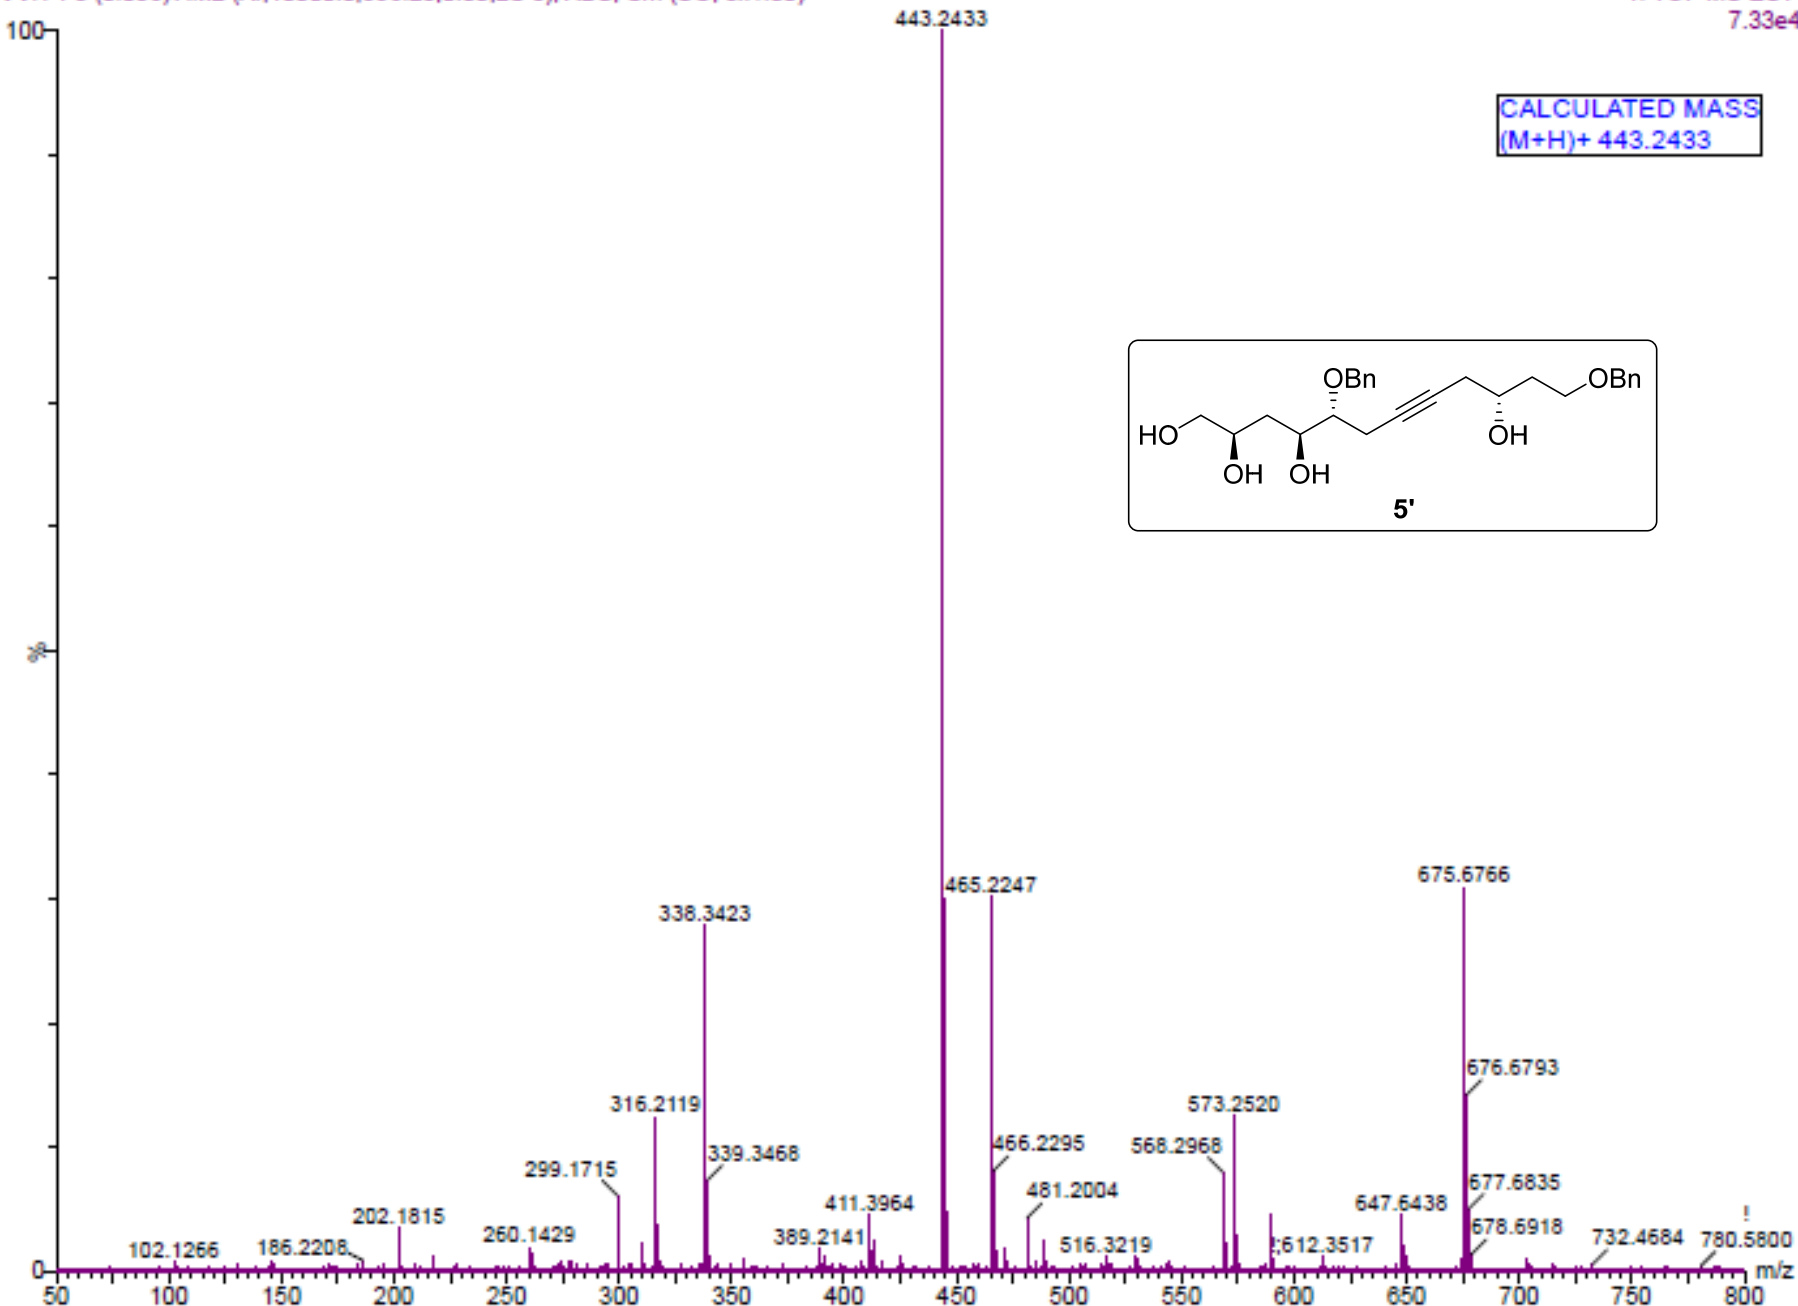

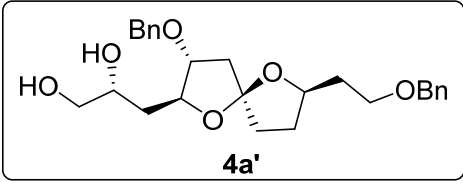

CHLOROFORM-d

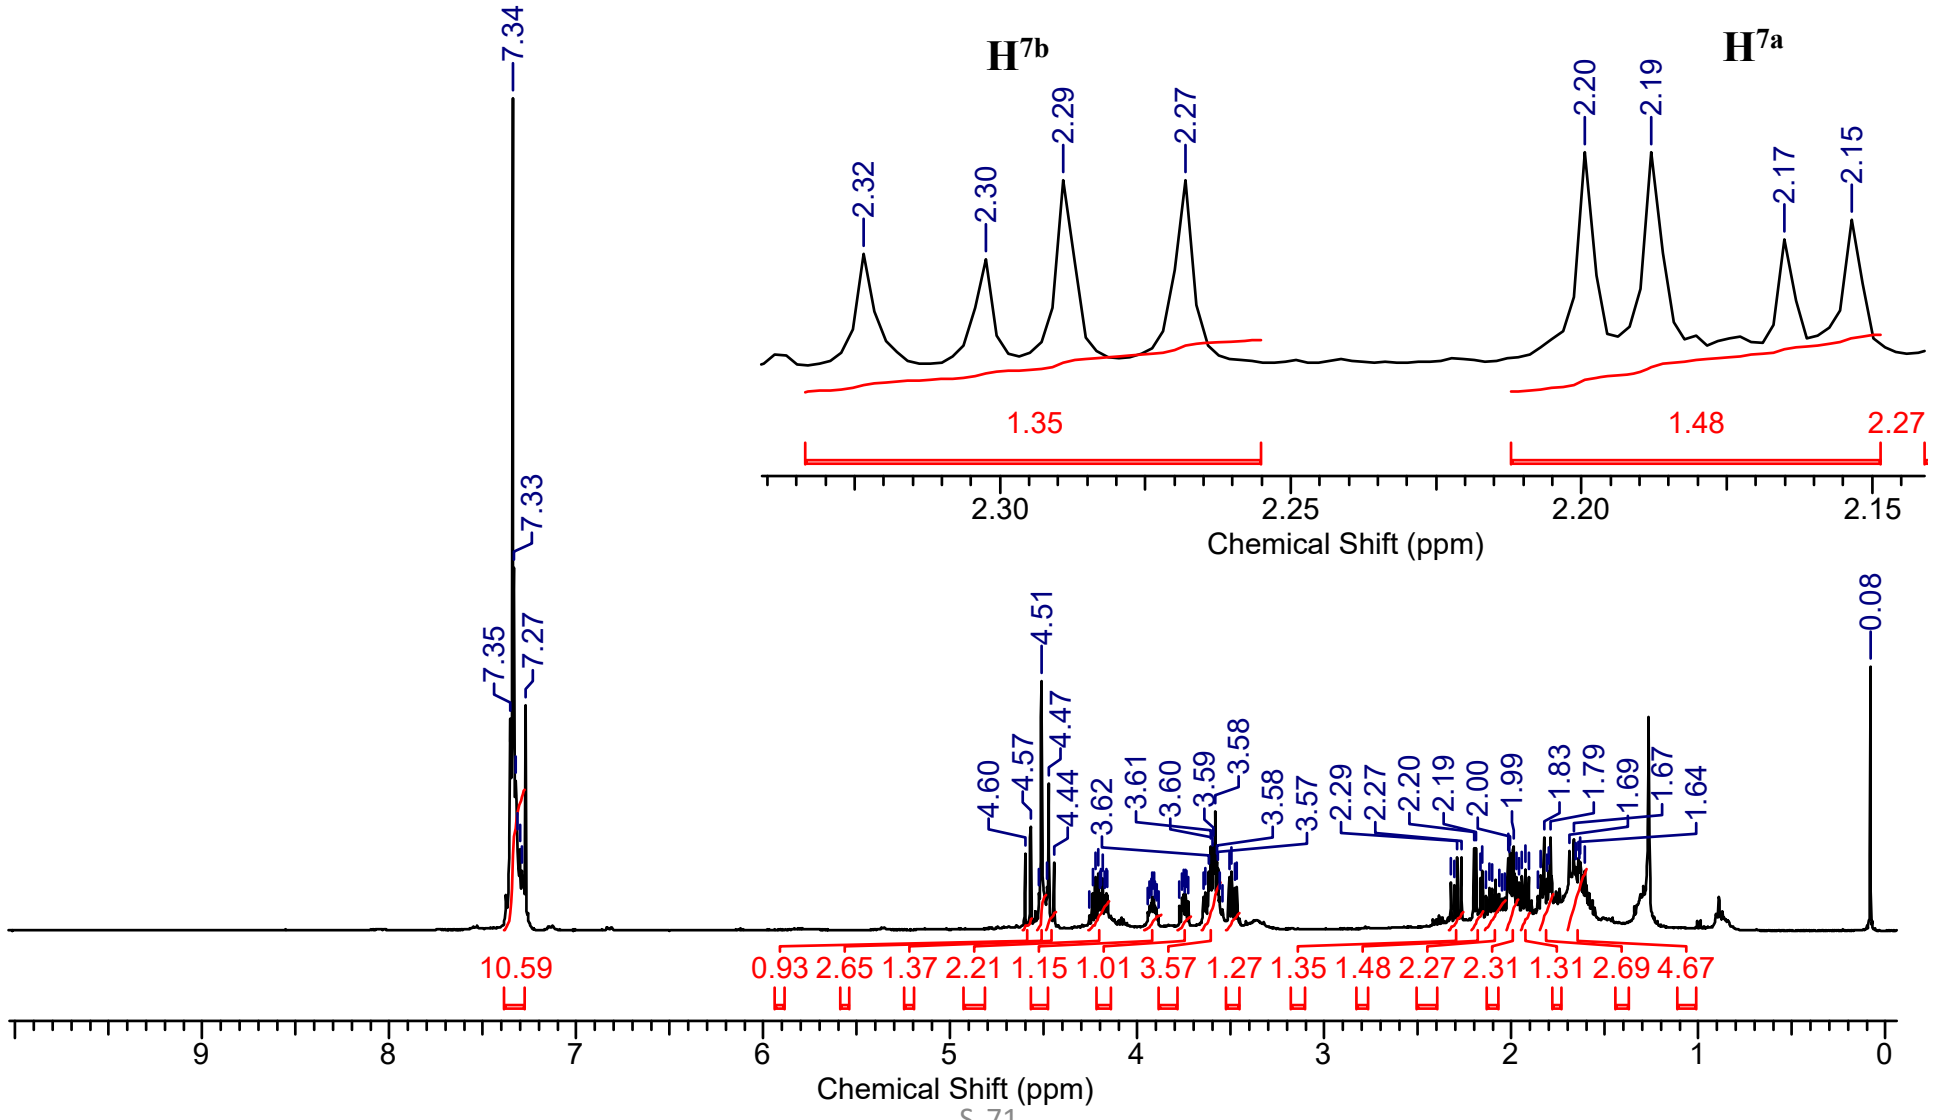

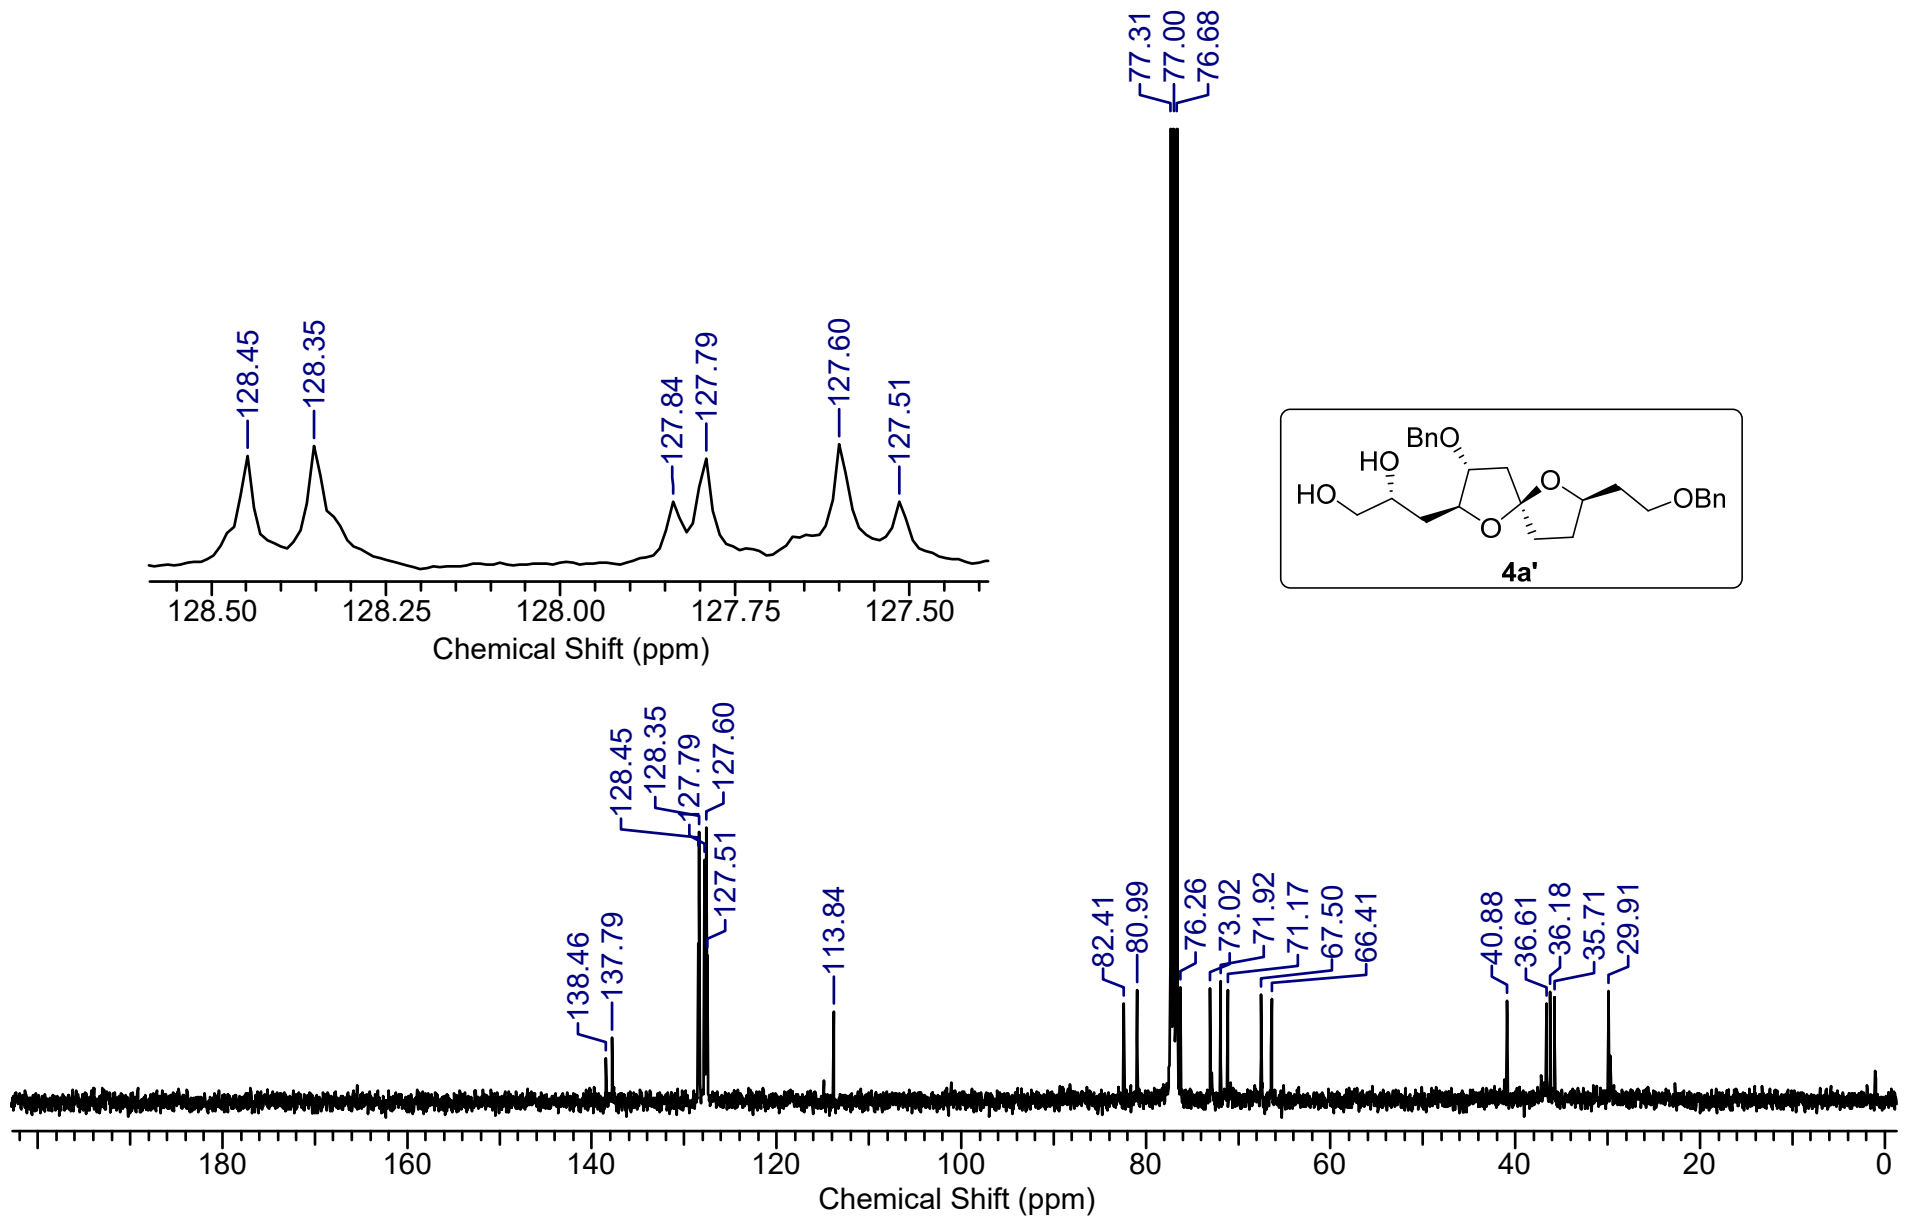



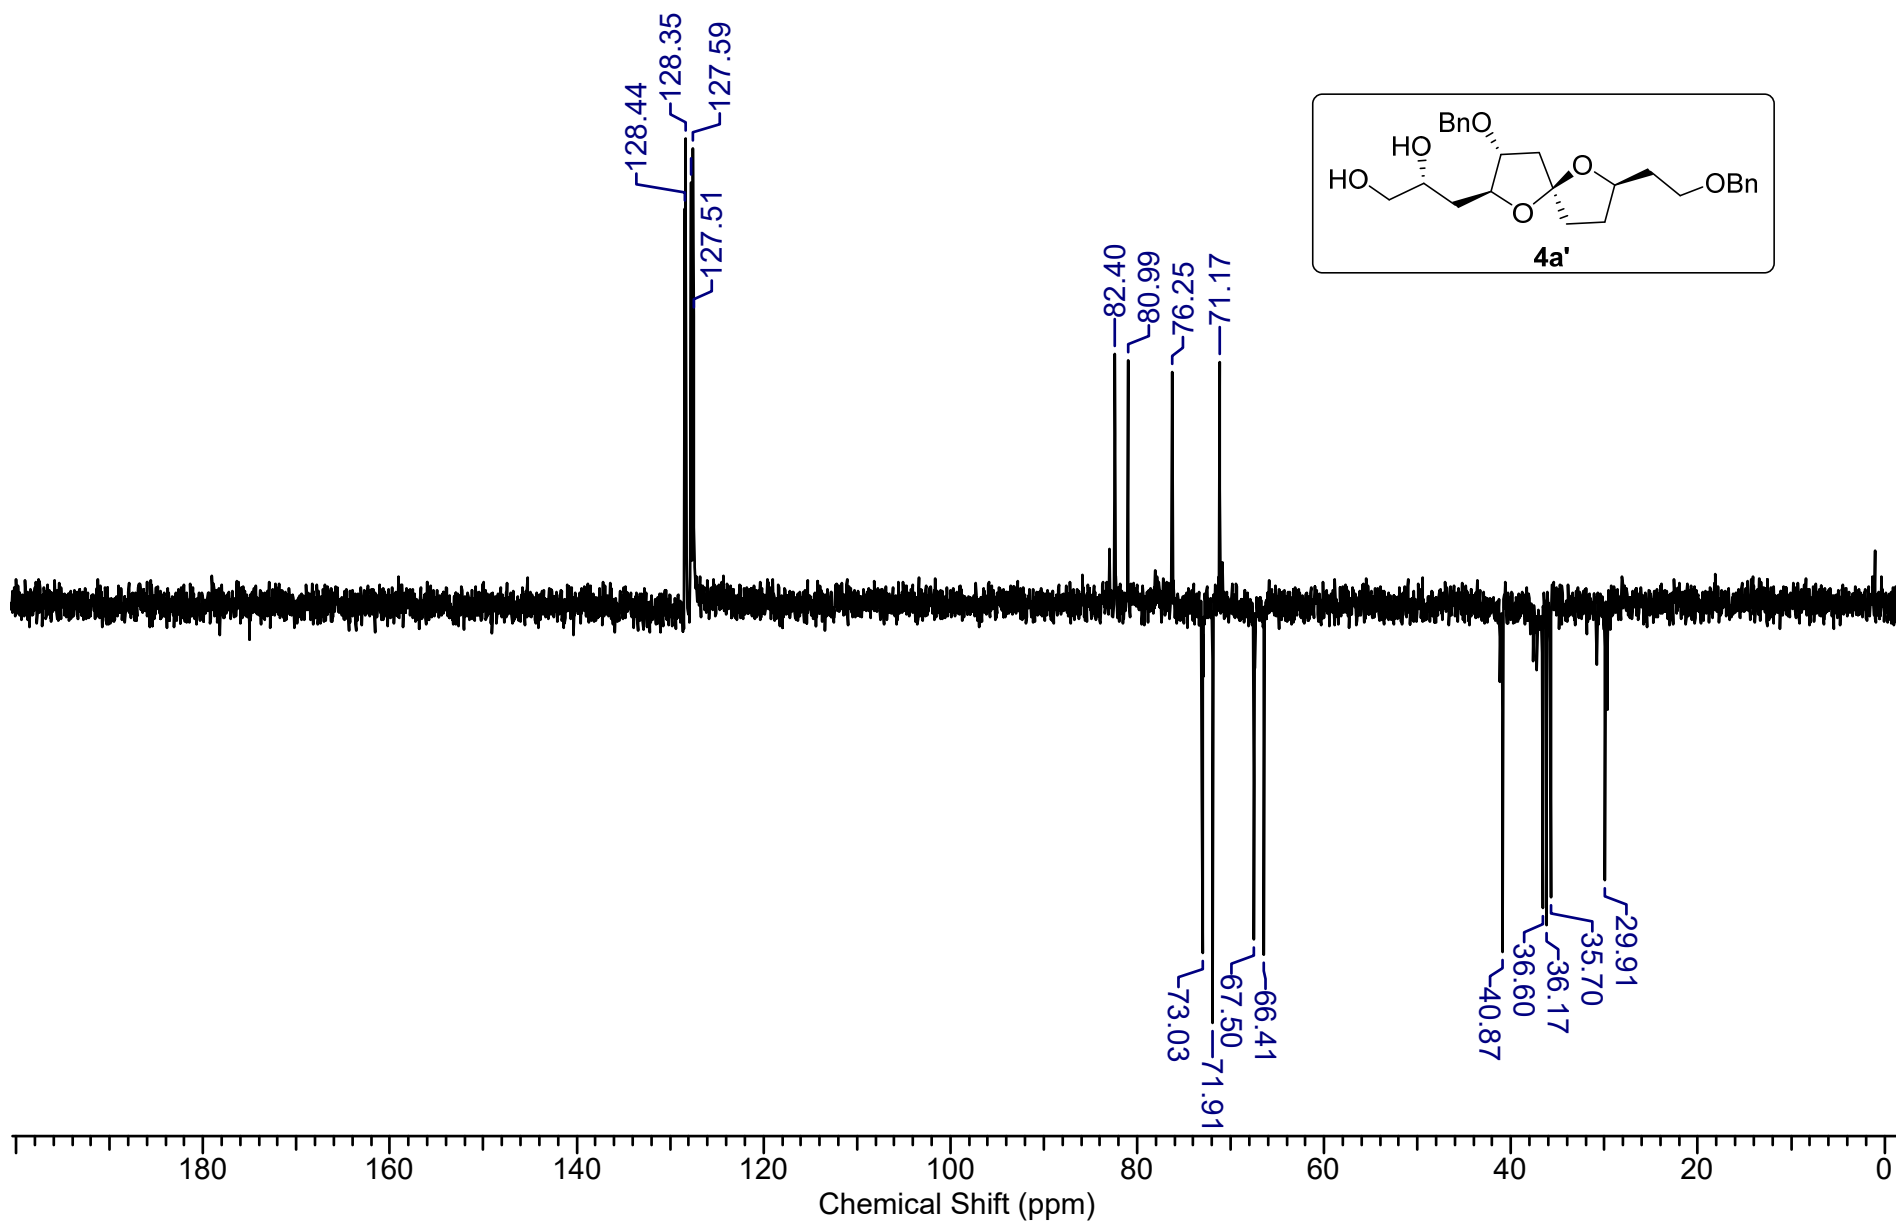

MS-10 #481 RT: 2.87 AV: 1 NL: 1.05E8  
T: FTMS + p ESI Full ms [100.0000-1500.0000]

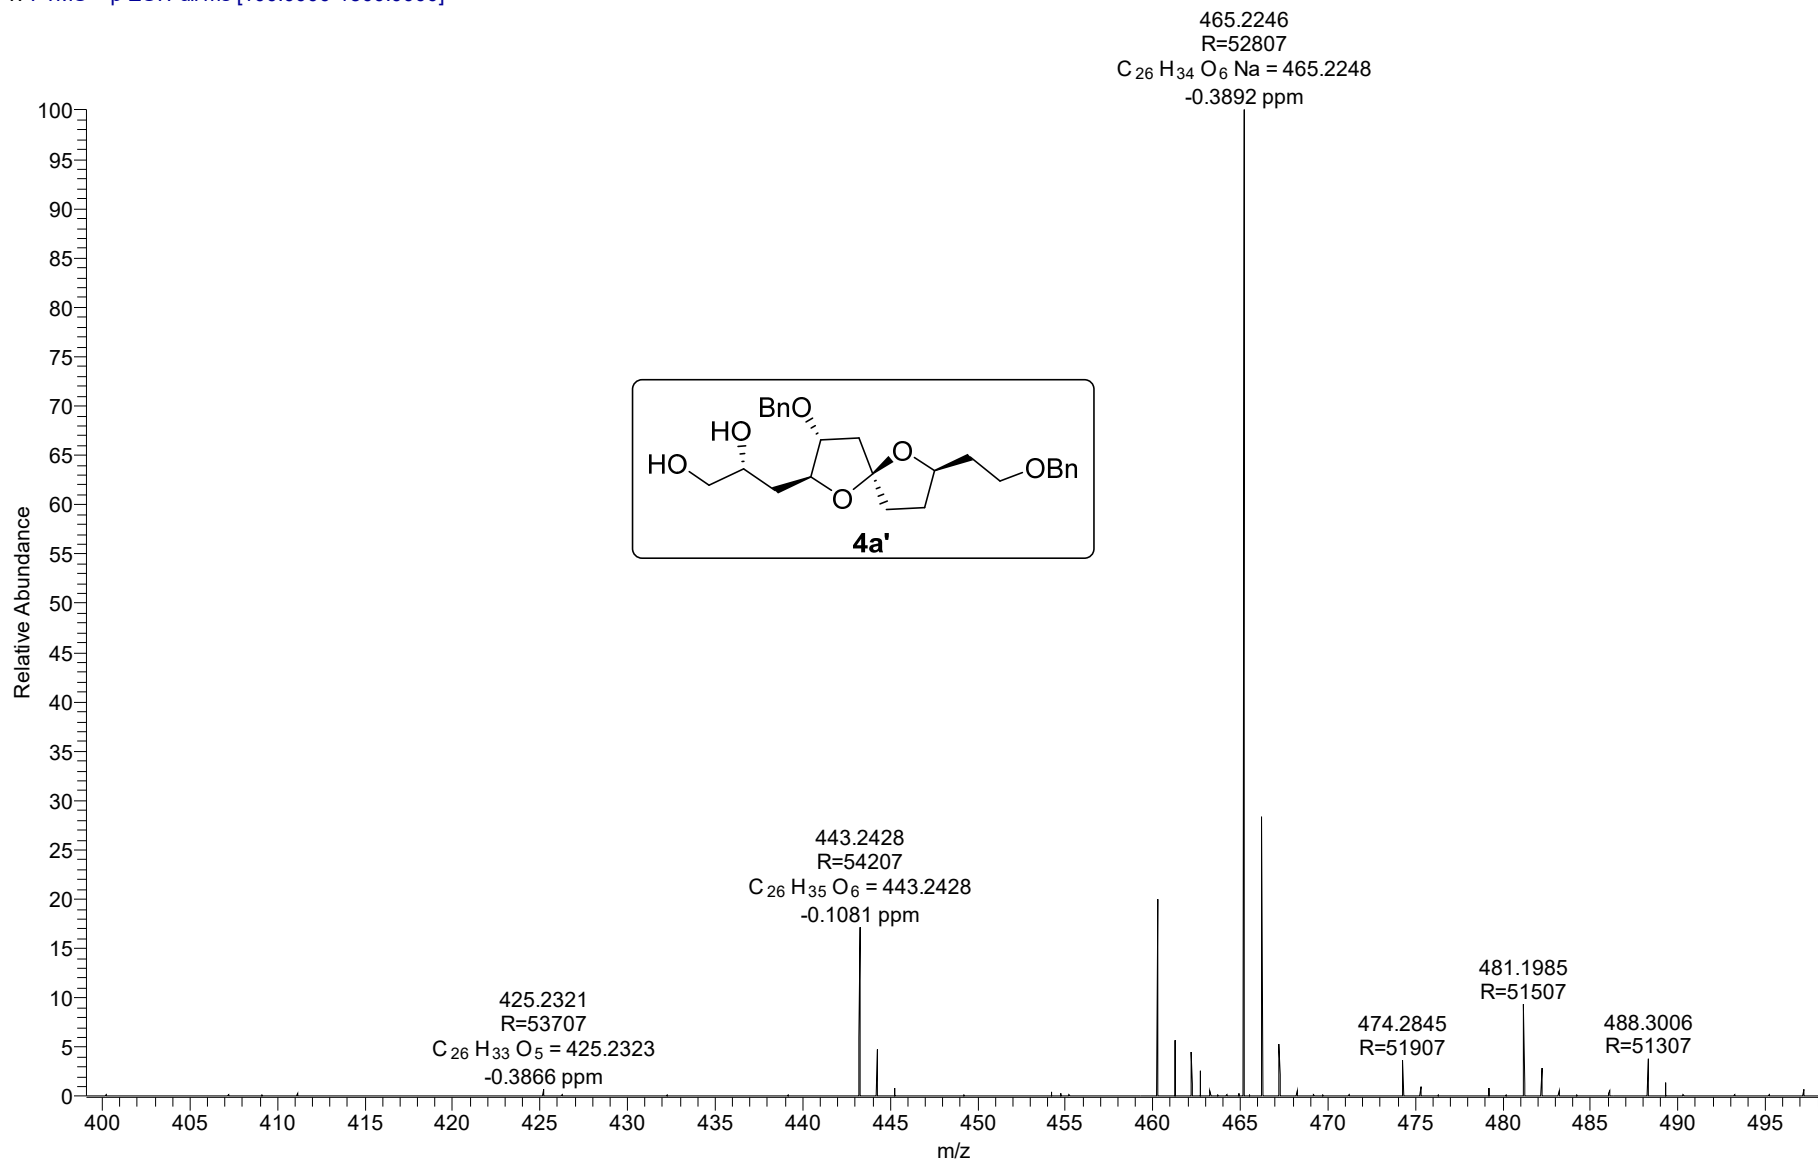

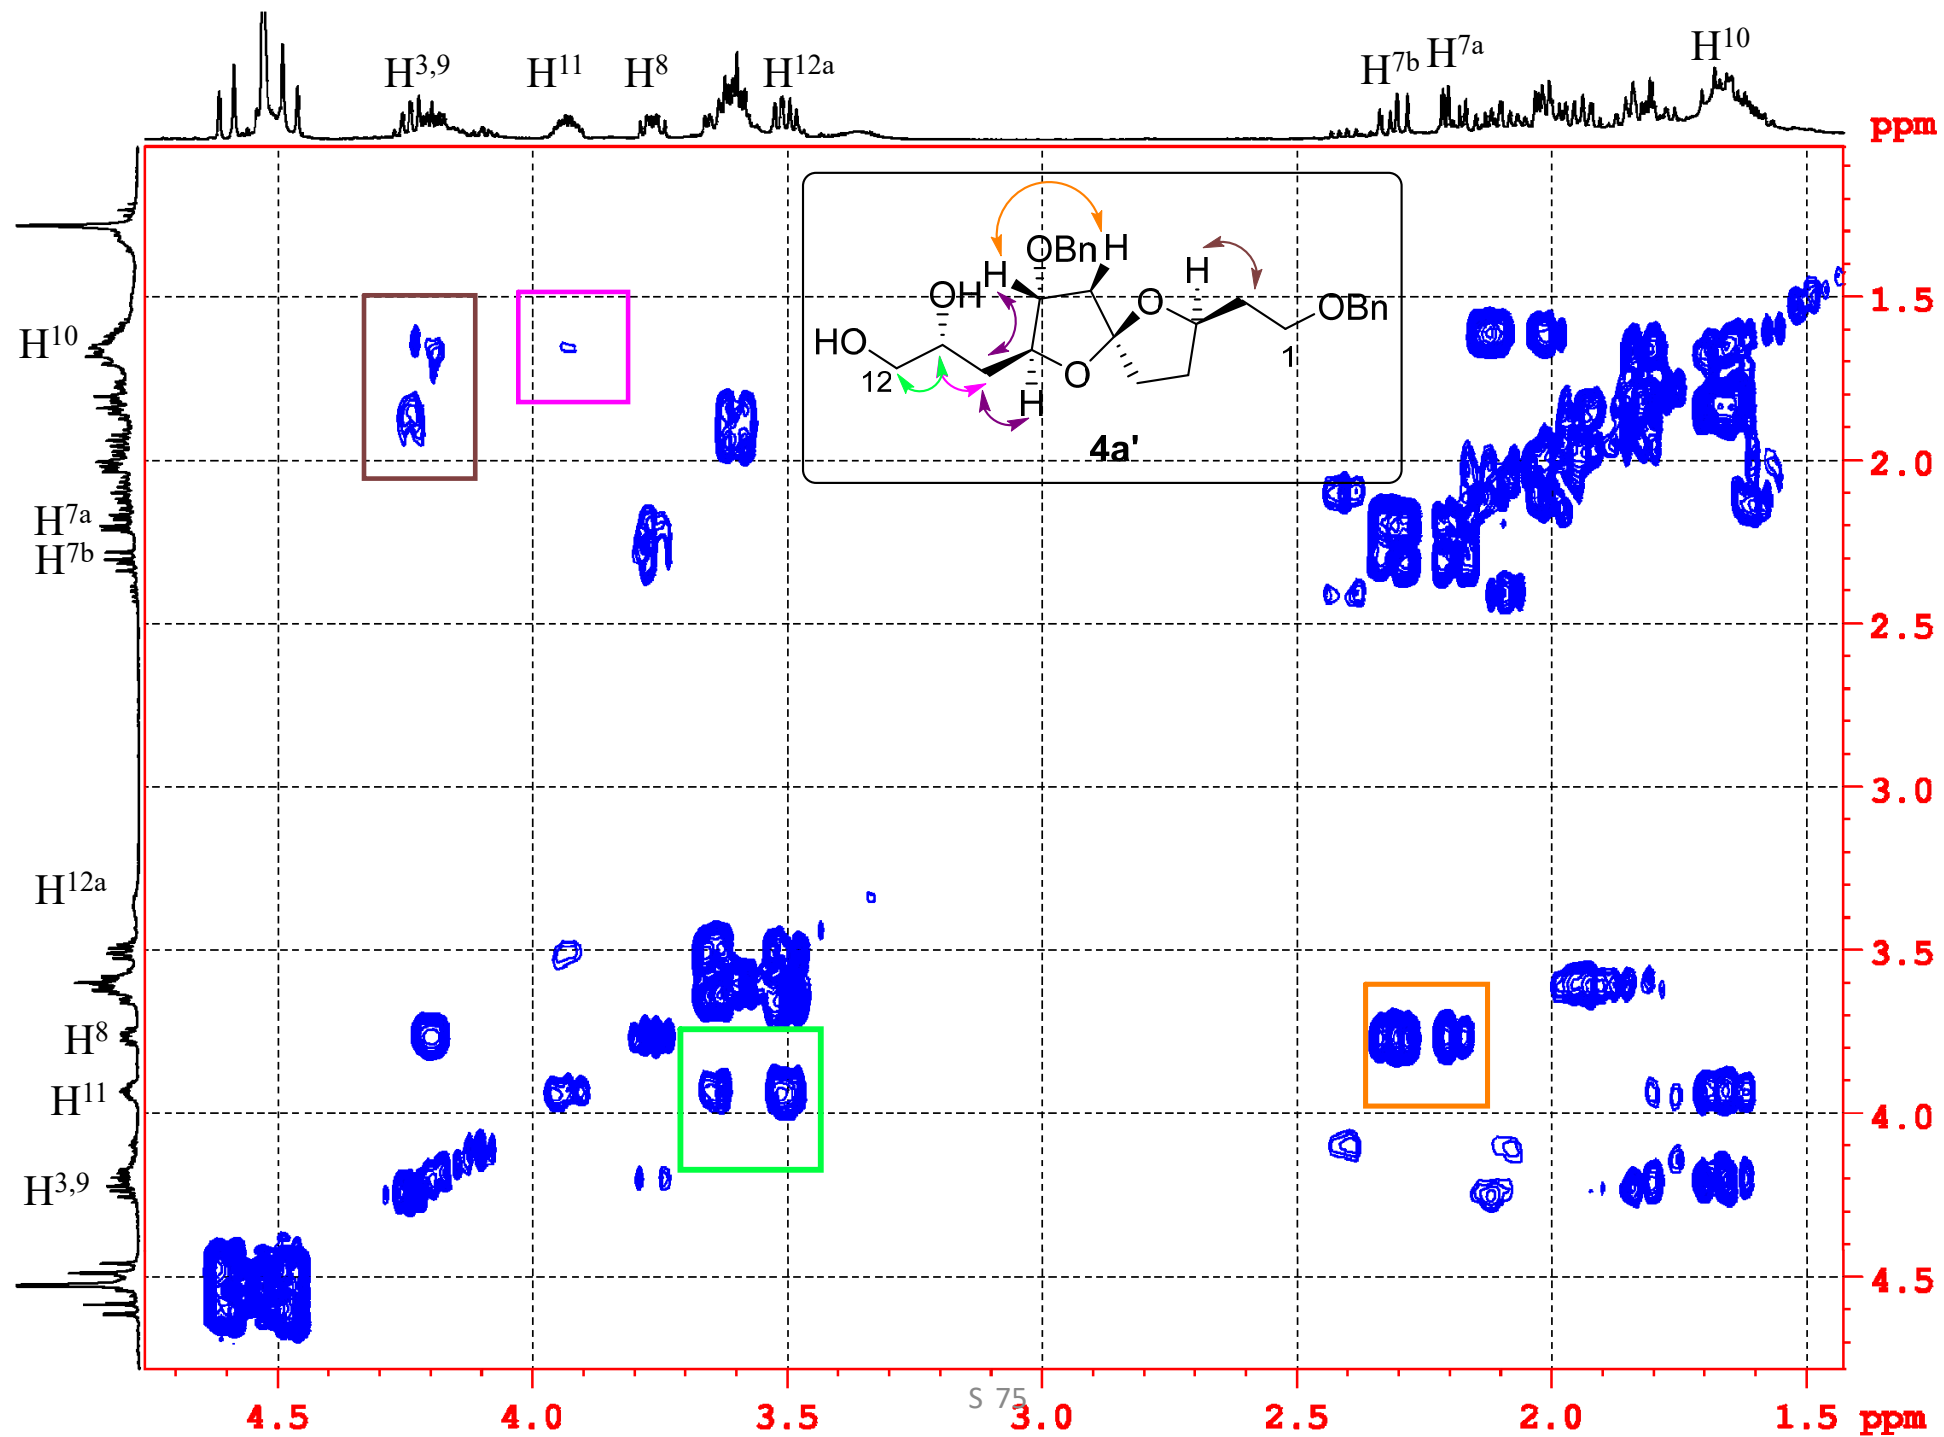

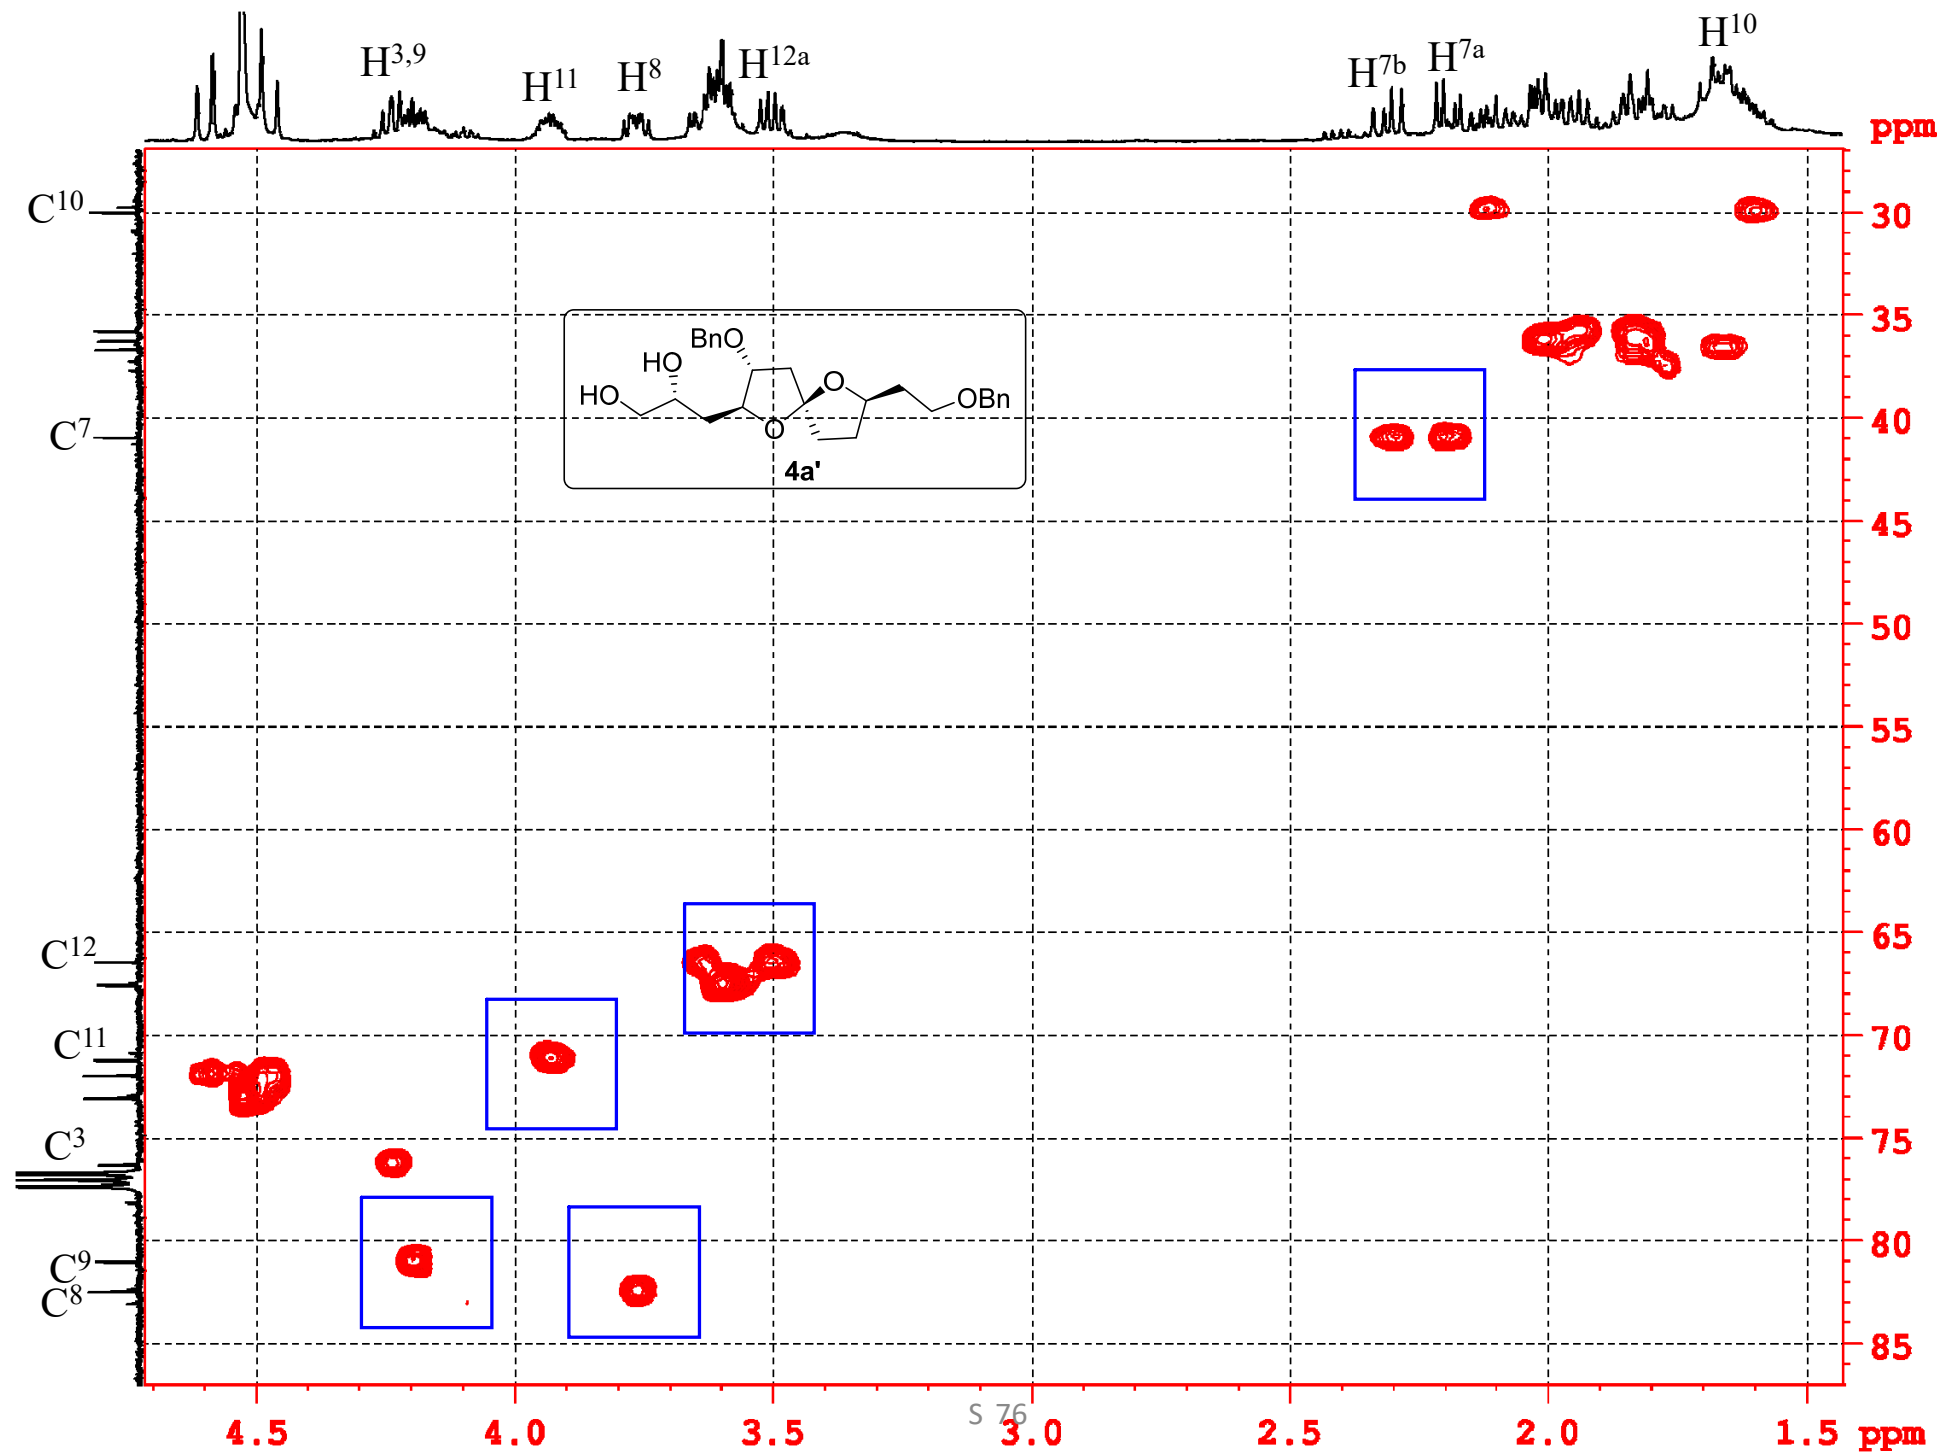

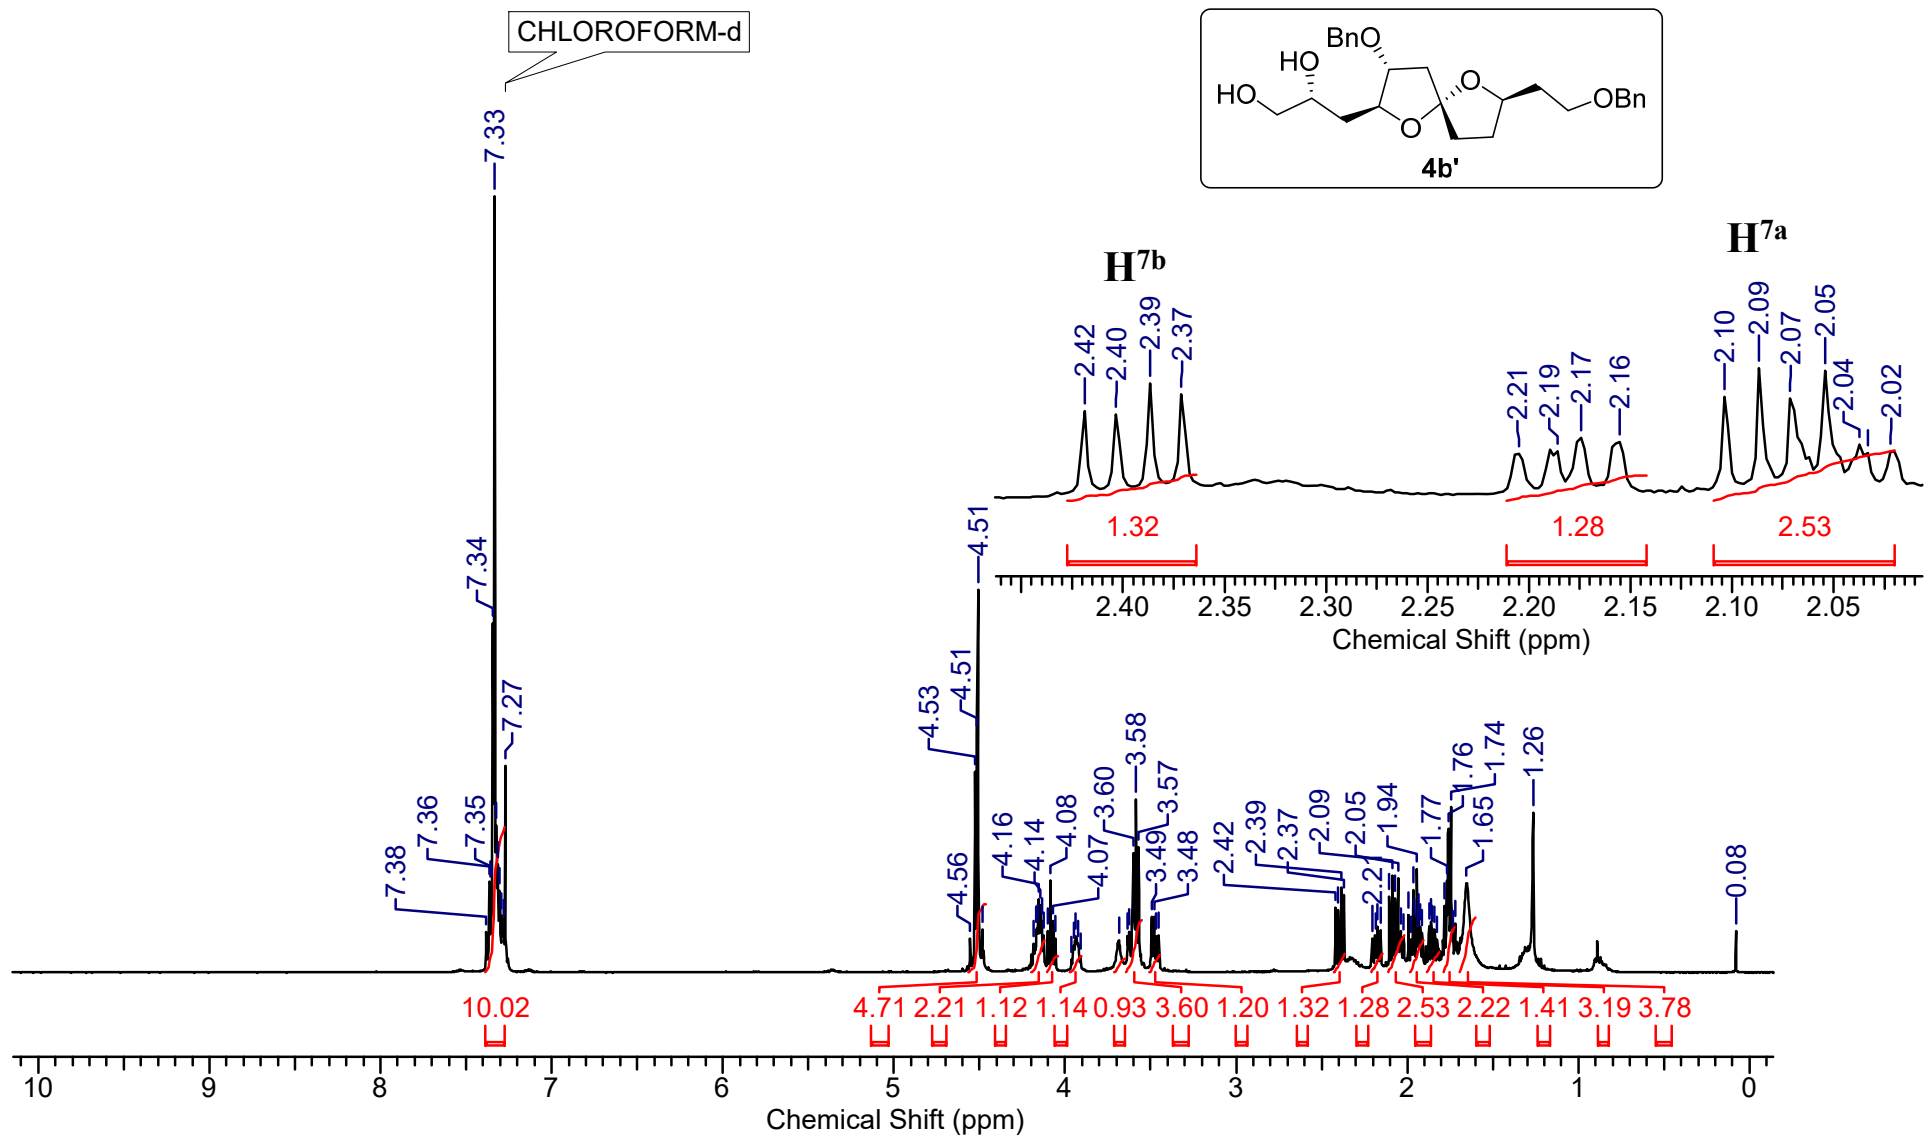

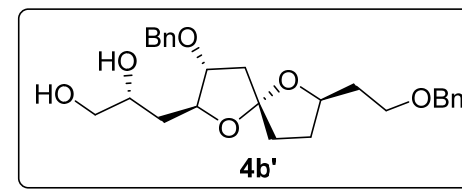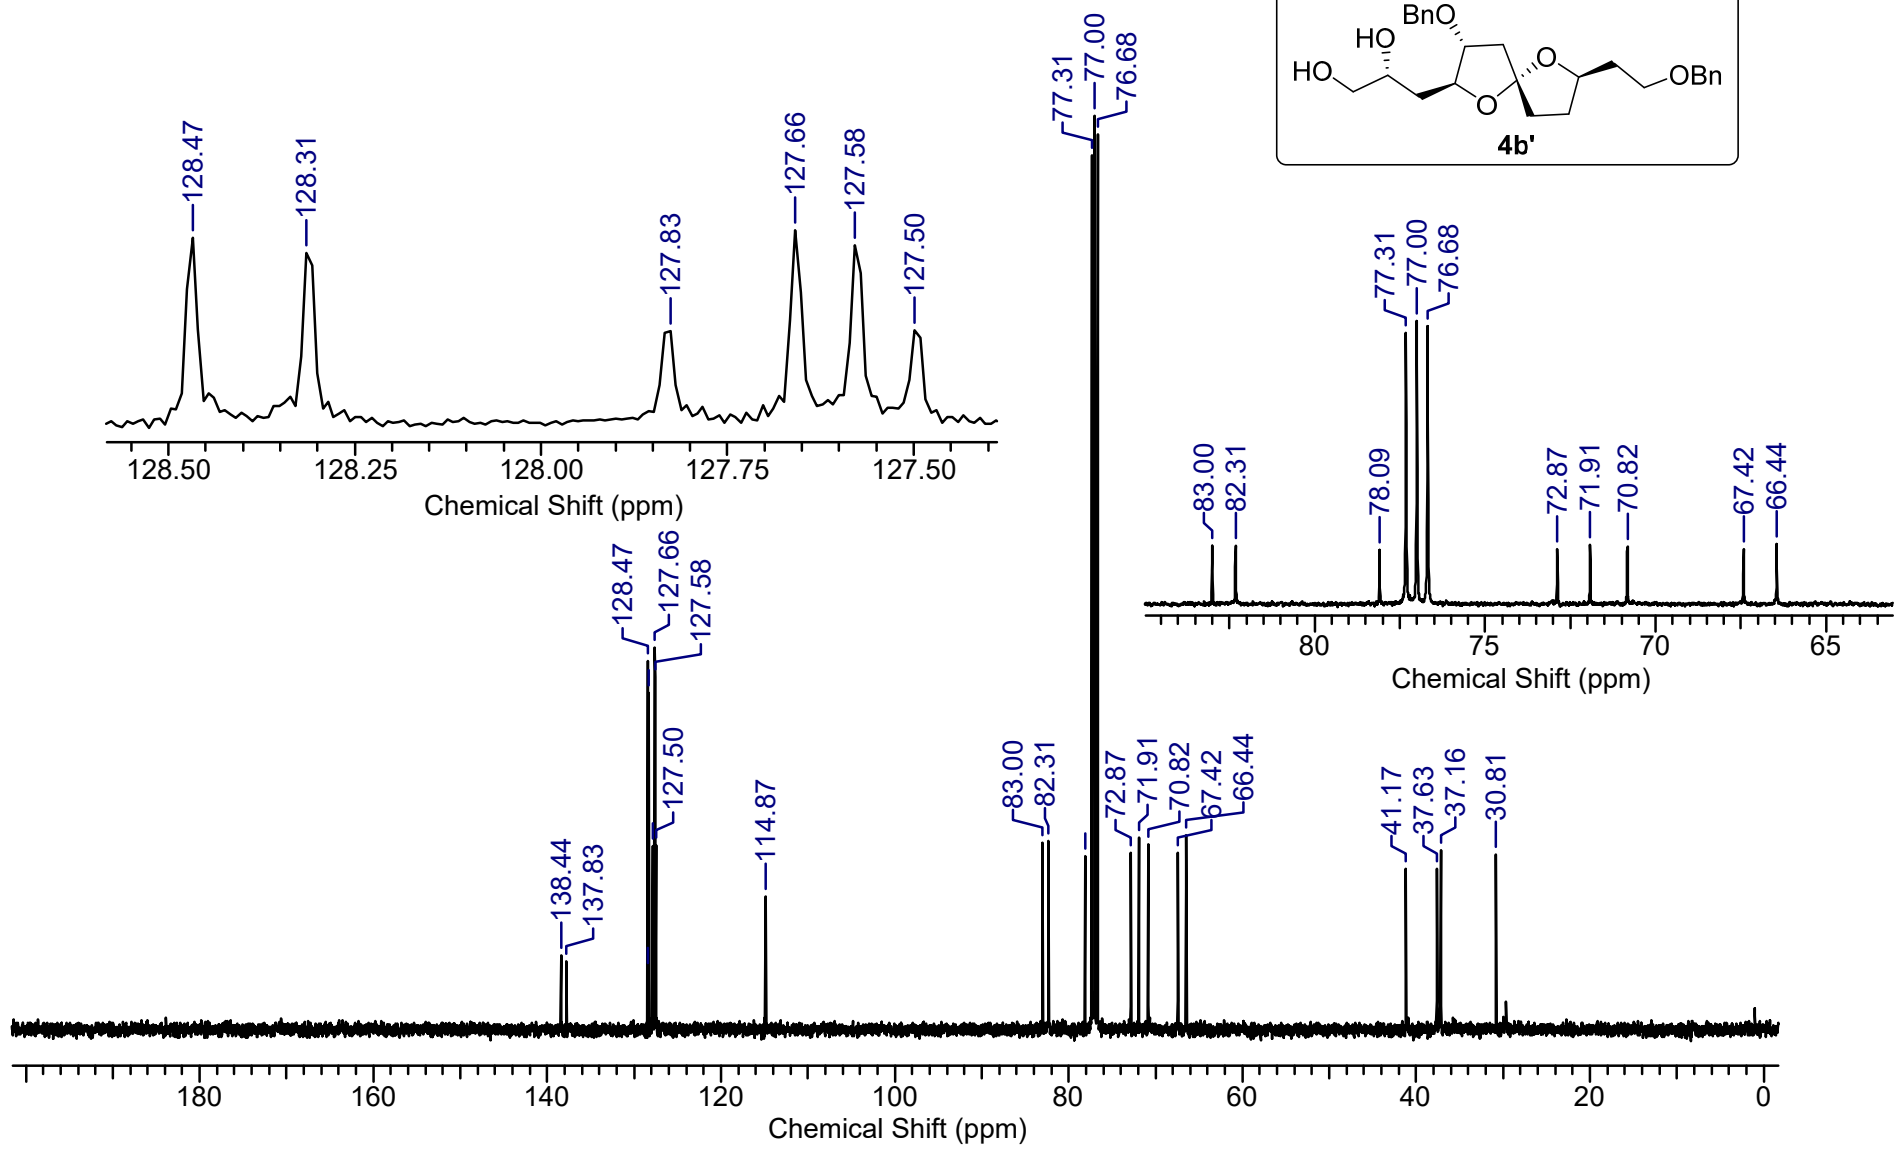

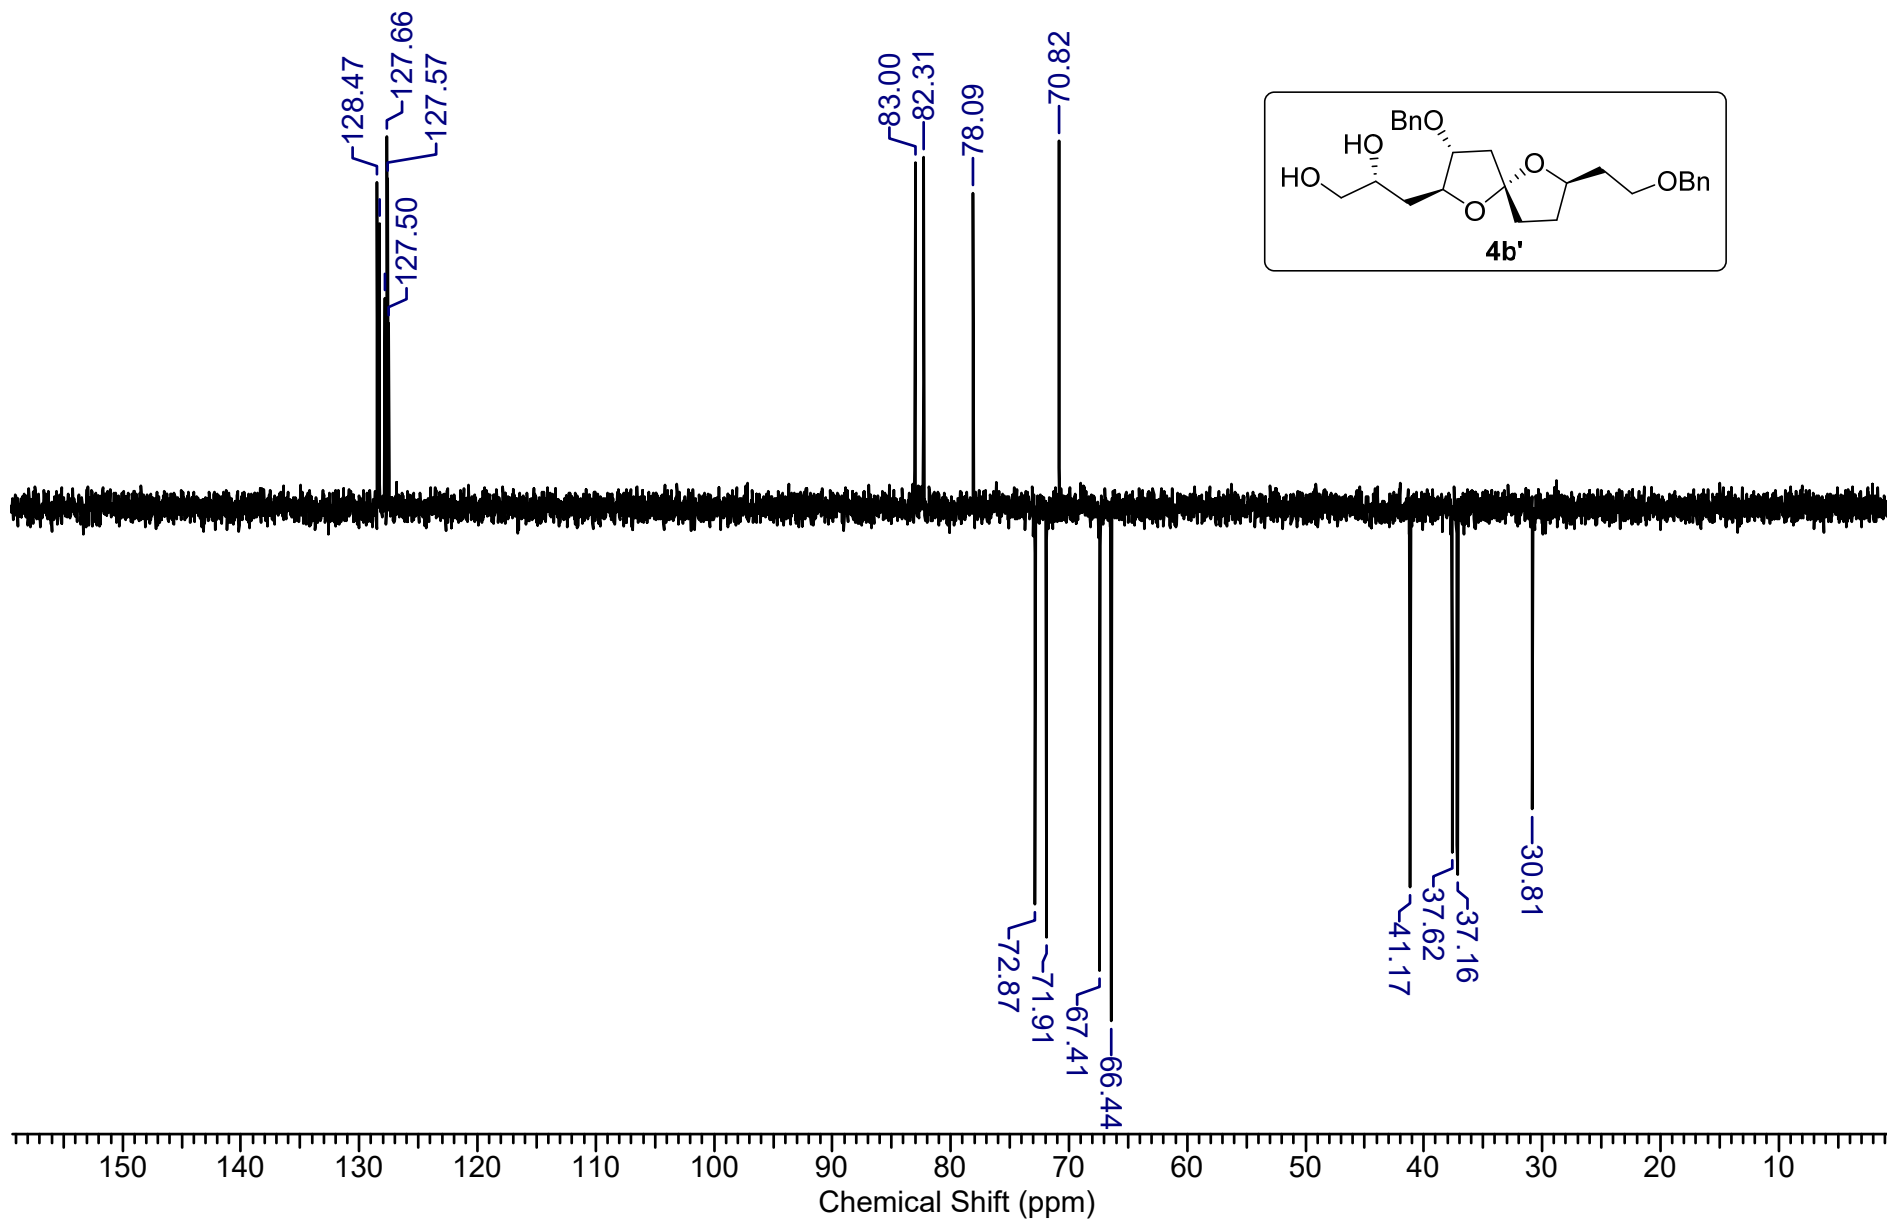

MS-10 #439 RT: 2.65 AV: 1 NL: 1.56E8  
T: FTMS + p ESI Full ms [100.0000-1500.0000]

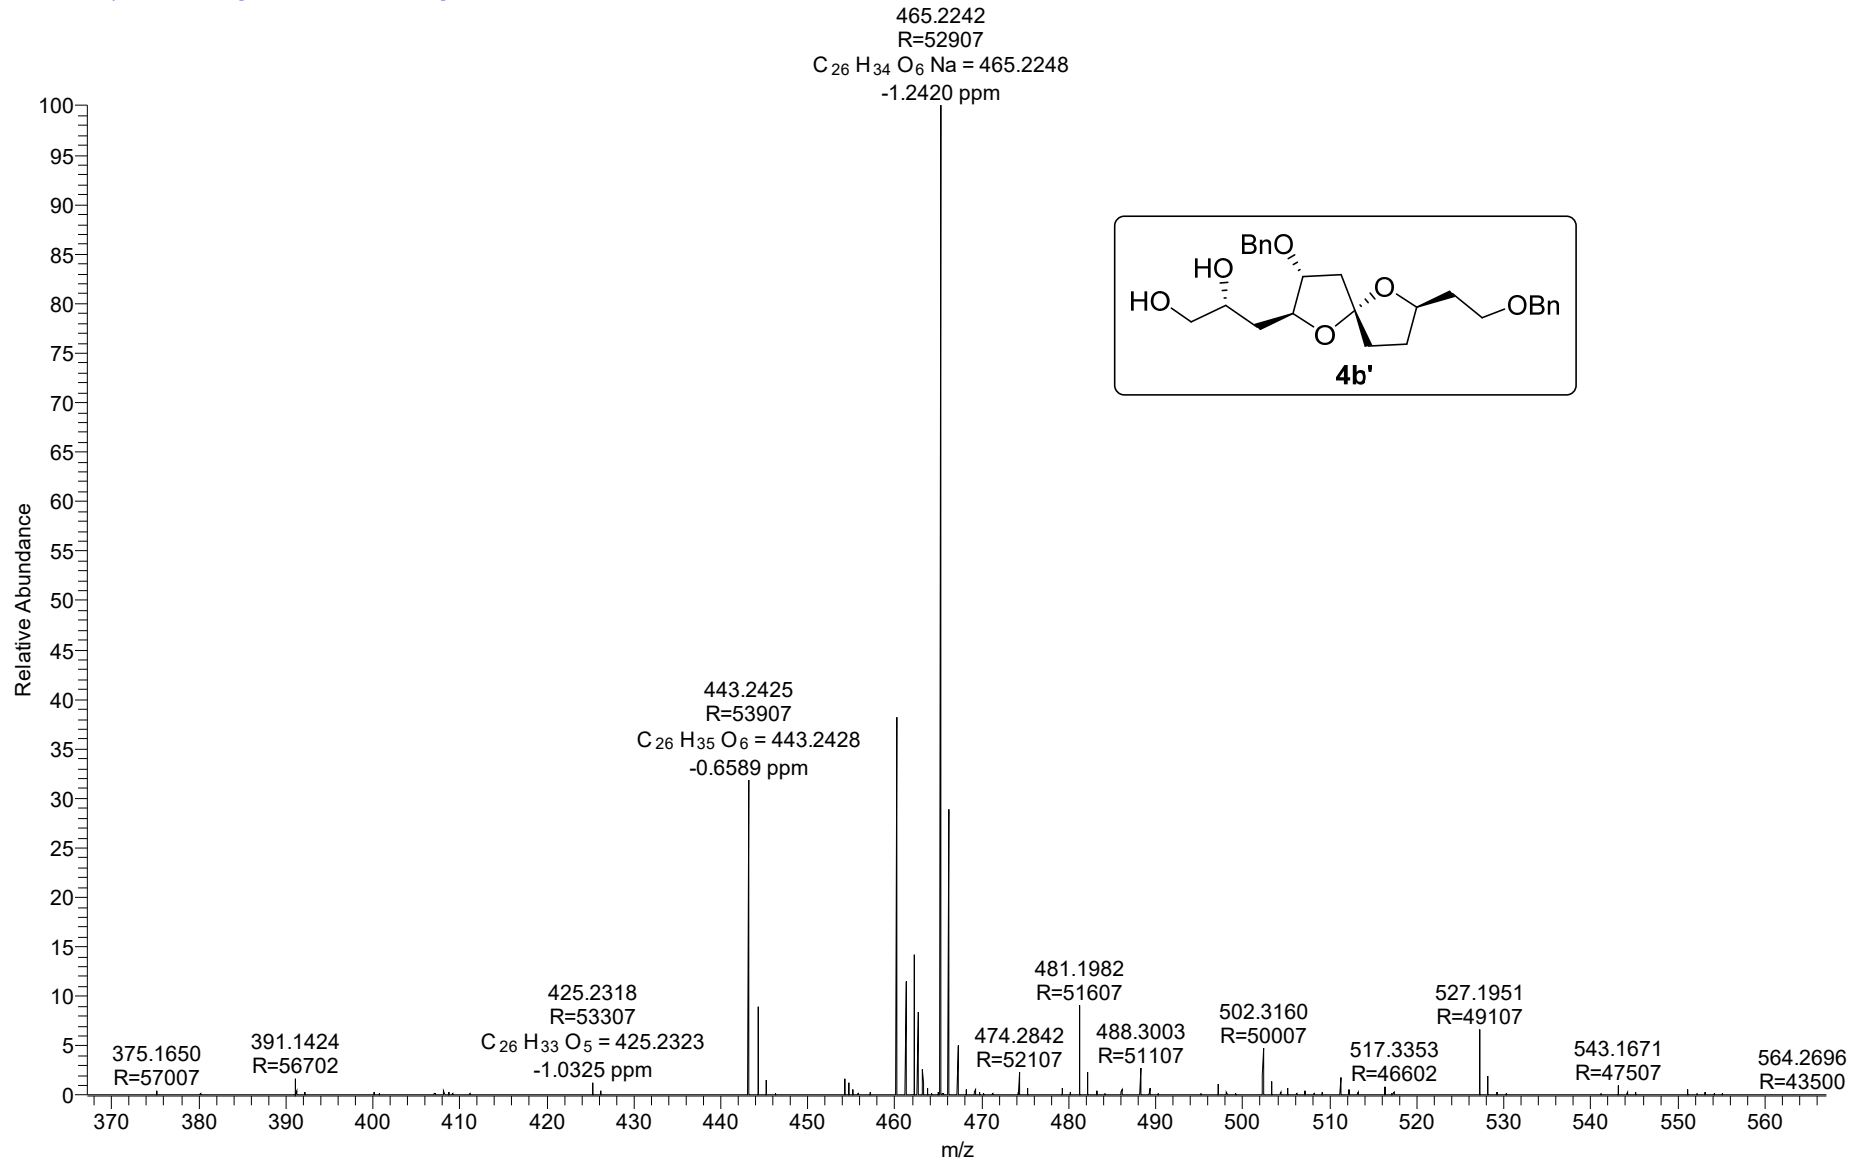



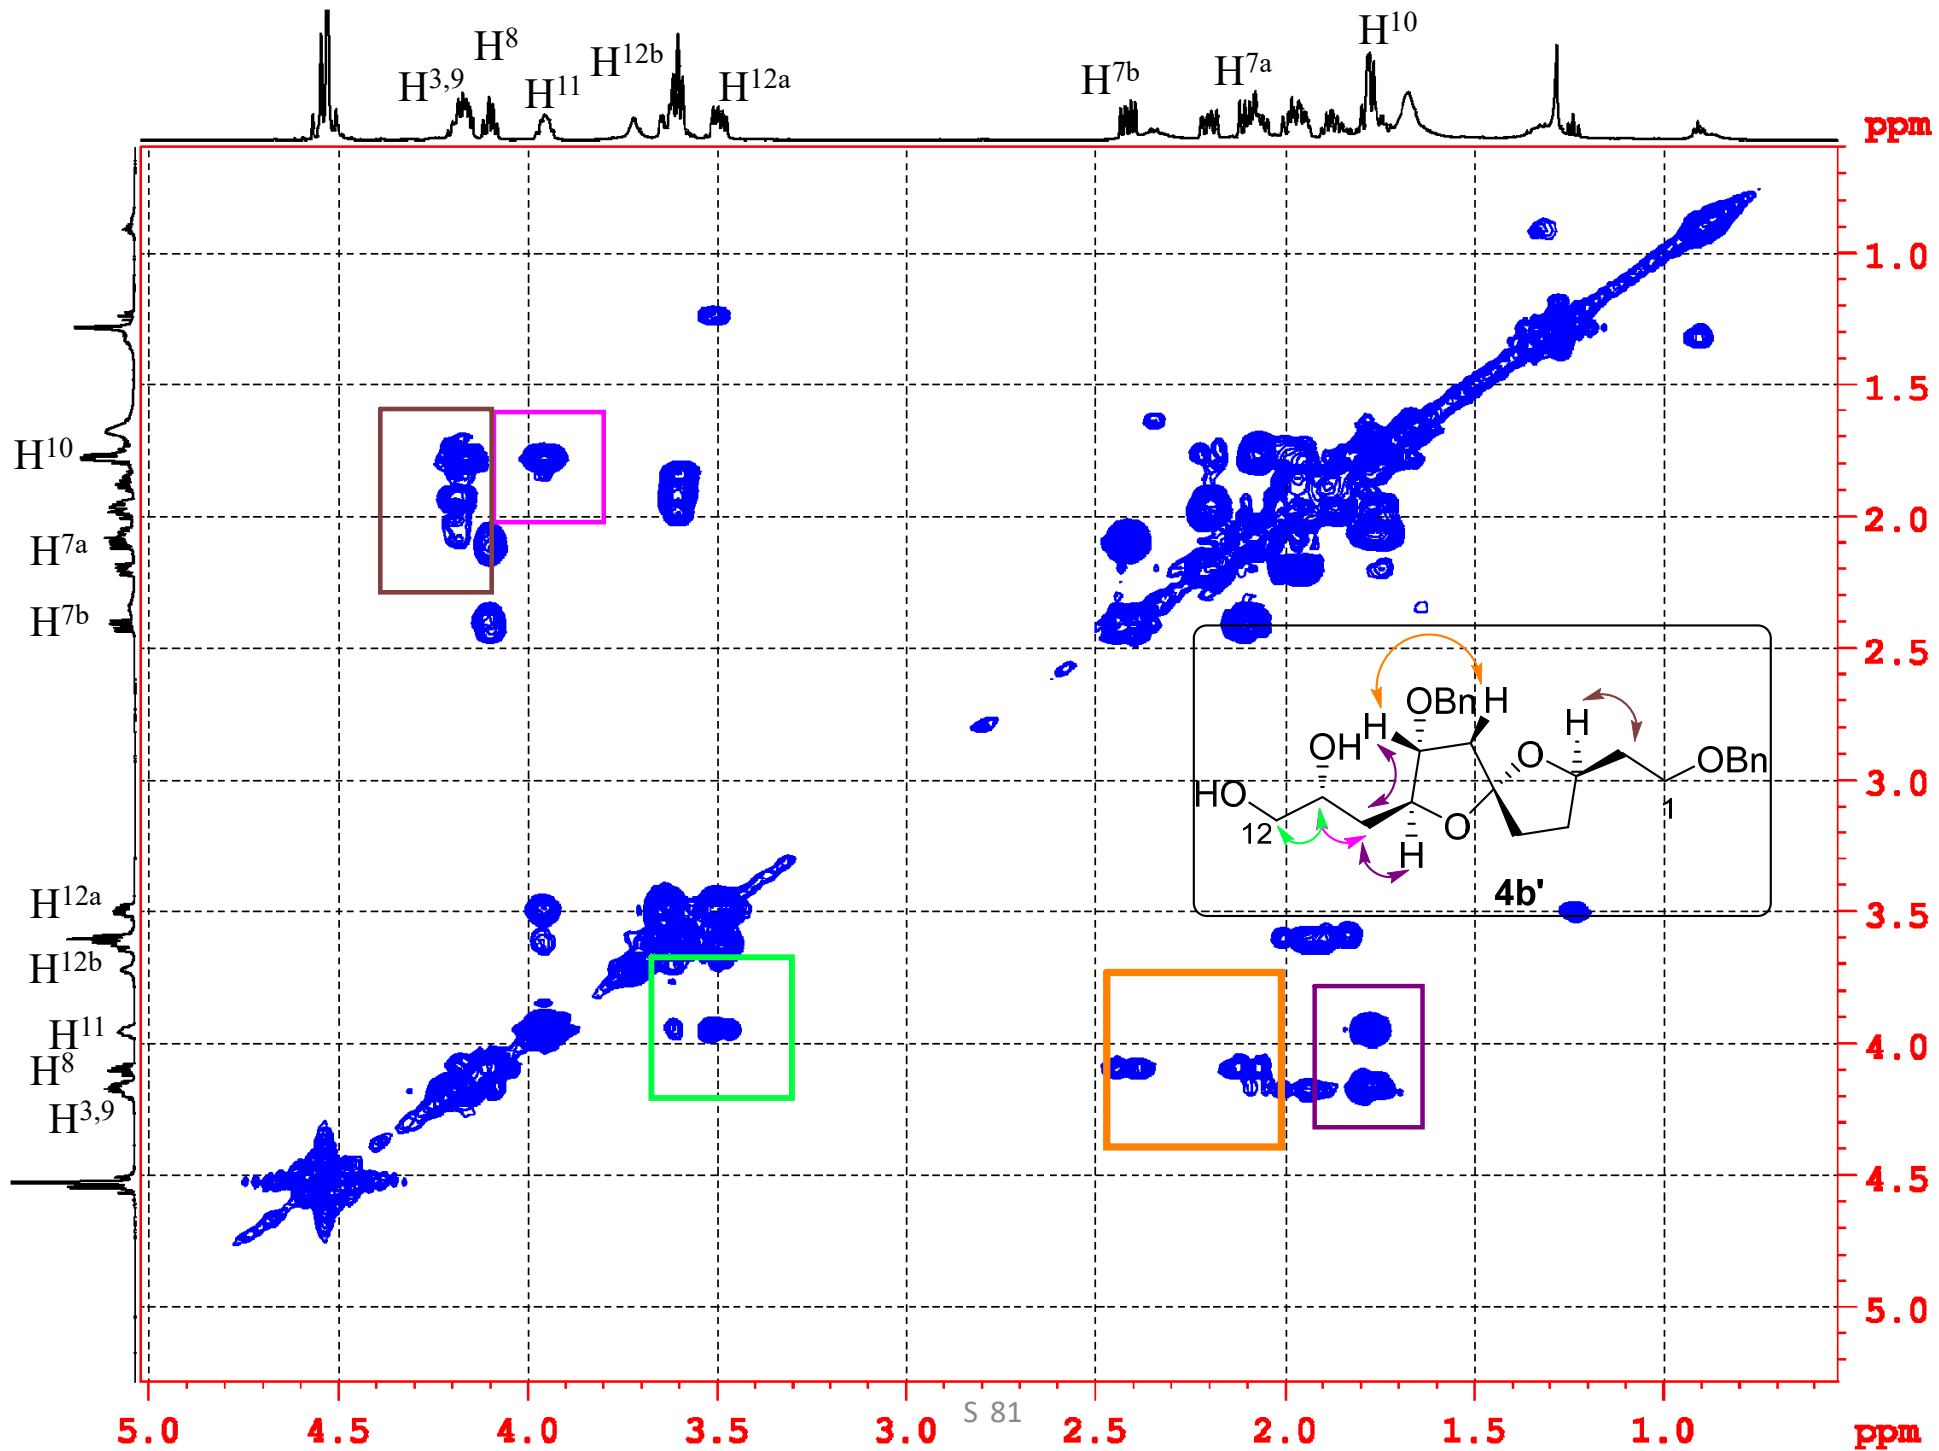

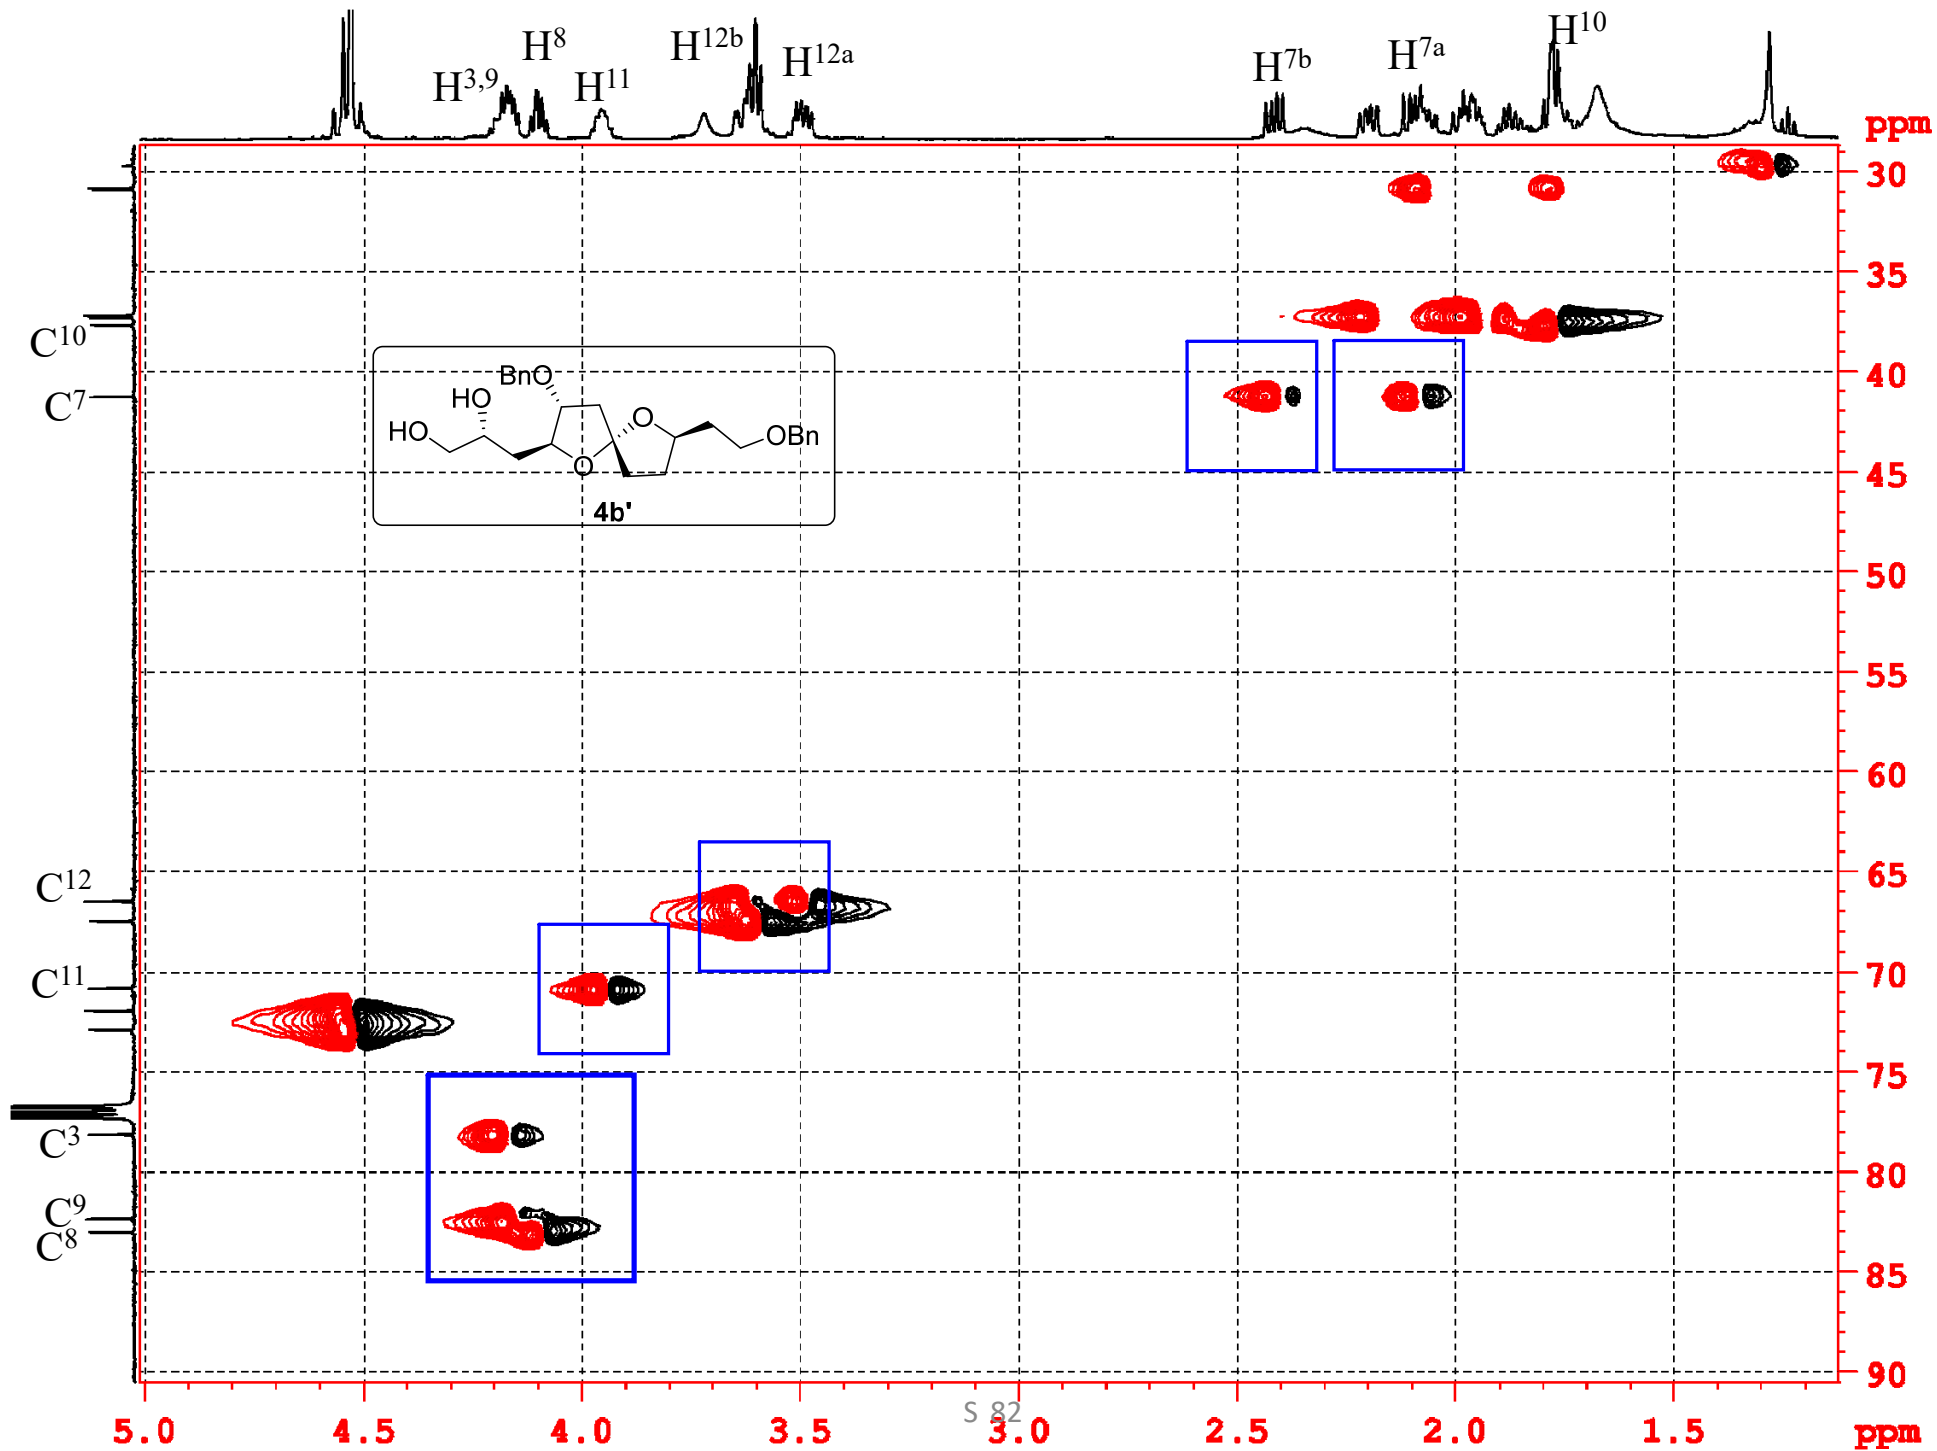

Supplement: d2nj02227c1.pdf [file d2nj02227c1.pdf]
